# Supplementary material for: Transcriptome profile of yeast reveals the essential role of PMA2 and uncharacterized gene YBR056W-A (MNC1) in adaptation to toxic manganese concentration
Source: Royal Society of Chemistry journal article supplement (doi:10.1039/c6mt00210b), 2017-01-01
Supplement: c6mt00210b2.xlsx [file c6mt00210b2.xlsx]

## Sheet: Reads statistics
Sample	Description	Total reads	Reads passed trimming	Mapped reads
ScK1	Control sample rep1	23260935	22888965	22086535
ScK2	Control sample rep2	20713245	20494125	19965905
ScM1	Mn2+ sample rep1	22492941	22251235	21584504
ScM2	Mn2+ sample rep2	20795550	20625294	20042554

## Sheet: edgeR DE genes
Gene	ScK1.count	ScK2.count	ScM1.count	ScM2.count	logFC	P-value	FDR	ID	Syst.name	Symbol	Description
YMR011W	25.9055	23.5871	774.252	808.275	4.9977	9.17344e-266	6.537e-262	S000004613	YMR011W	HXT2	HeXose Transporter
YER124C	1812.46	1892.75	103.991	90.0803	-4.25443	5.12036e-194	1.82439e-190	S000000926	YER124C	DSE1	Daughter Specific Expression
YMR303C	58.7474	53.8598	1743.87	1382.15	4.79453	6.71367e-191	1.59472e-187	S000004918	YMR303C	ADH2	Alcohol DeHydrogenase
YBR056W-A	2.90198	1.87796	83.8564	83.5275	5.11695	5.41205e-185	9.64157e-182	S000028736	YBR056W-A
YNR064C	24.136	18.8547	324.437	327.163	3.91942	5.61453e-183	8.00183e-180	S000005347	YNR064C
YOR385W	26.9672	30.8736	608.531	747.327	4.55113	1.08345e-181	1.28678e-178	S000005912	YOR385W
YHR143W	2107.33	2296.44	141.752	125.765	-4.04073	3.77783e-177	3.84583e-174	S000001186	YHR143W	DSE2	Daughter Specific Expression
YMR316W	29.0198	28.6201	337.122	360.4	3.59652	2.40972e-176	2.14645e-173	S000004935	YMR316W	DIA1	Digs Into Agar
YBR296C	36.027	31.5497	363.968	325.268	3.34942	2.03526e-146	1.61148e-143	S000000500	YBR296C	PHO89	PHOsphate metabolism
YPL036W	31.5679	22.6857	810.17	646.115	4.74466	2.28819e-145	1.63056e-142	S000005957	YPL036W	PMA2	Plasma Membrane ATPase
YGL205W	38.3627	37.1835	292.871	280.346	2.92321	7.23708e-145	4.68831e-142	S000003173	YGL205W	POX1
YER184C	21.9418	18.8547	160.928	160.739	2.97707	5.87836e-137	3.49077e-134	S000000986	YER184C	TOG1	Transcriptional regulator of Oleate utilization Genes
YJL153C	86.1392	67.2308	1031.87	1110.33	3.80332	1.46945e-136	8.05487e-134	S000003689	YJL153C	INO1	INOsitol requiring
YGL028C	907.682	941.833	111.292	103.659	-3.10477	2.19883e-130	1.1192e-127	S000002996	YGL028C	SCW11	Soluble Cell Wall protein
YDL218W	22.1541	19.8312	185.93	159.16	3.03782	4.67298e-124	2.21998e-121	S000002377	YDL218W
YGL255W	53.8635	49.2025	380.931	377.216	2.87832	1.13958e-121	5.07541e-119	S000003224	YGL255W	ZRT1	Zinc-Regulated Transporter
YOL016C	238.387	245.712	1747.64	1754.08	2.85467	1.06155e-112	4.44977e-110	S000005376	YOL016C	CMK2	CalModulin dependent protein Kinase
YMR096W	166.899	138.969	1338.75	1280.31	3.09777	1.3595e-109	5.3821e-107	S000004702	YMR096W	SNZ1	SNooZe
YPL275W	3.11432	3.60568	58.2644	52.6587	4.04393	1.46015e-109	5.47634e-107	S000006196	YPL275W	FDH2
YOL104C	6.22864	6.46017	71.171	66.001	3.43322	1.66938e-107	5.94801e-105	S000005464	YOL104C	NDJ1	NonDisJunction
YDL227C	252.331	362.821	21.2407	23.2109	-3.79044	5.98341e-105	2.03037e-102	S000002386	YDL227C	HO	HOmothallic switching endonuclease
YEL065W	39.1413	35.6812	187.773	194.766	2.3531	1.09511e-104	3.54715e-102	S000000791	YEL065W	SIT1	Siderophore Iron Transport
YPR145C-A	4.2468	3.15497	55.5355	62.922	3.99207	1.78644e-104	5.53486e-102	S000113589	YPR145C-A
YNL277W-A	61.1539	66.0289	5.67893	6.00009	-3.44348	1.85591e-103	5.51052e-101	S000028852	YNL277W-A
YOR383C	47.1394	41.5404	220.667	218.845	2.30828	1.30326e-100	3.7148e-98	S000005910	YOR383C	FIT3	Facilitator of Iron Transport
YHR139C	31.6386	21.3336	351.577	301.662	3.62219	1.92581e-100	5.2782e-98	S000001181	YHR139C	SPS100	SPorulation Specific
YOR388C	6.3702	4.50709	62.9108	64.3431	3.54125	1.04495e-98	2.7579e-96	S000005915	YOR388C	FDH1	Formate DeHydrogenase
YER096W	35.4608	30.0473	175.309	183.634	2.45249	1.23055e-97	3.13175e-95	S000000898	YER096W	SHC1	Sporulation-specific Homolog of CSD4
YEL069C	8.91827	8.11277	70.3597	78.0011	3.11995	4.452e-97	1.09396e-94	S000000795	YEL069C	HXT13	HeXose Transporter
YLR054C	17.2703	15.6246	96.0256	108.712	2.63575	4.78577e-97	1.13678e-94	S000004044	YLR054C	OSW2	Outer Spore Wall
YBR182C	25.5516	28.9205	143.153	151.107	2.43393	1.21865e-96	2.80133e-94	S000000386	YBR182C	SMP1	Second MEF2-like Protein 1
YIL067C	39.9907	36.0568	177.964	185.055	2.25406	2.91613e-95	6.49386e-93	S000001329	YIL067C
YNL066W	622.368	650.374	113.431	105.396	-2.53978	6.72517e-95	1.45223e-92	S000005010	YNL066W	SUN4
YHL024W	80.6184	74.1417	417.733	415.98	2.42913	1.57642e-93	3.30399e-91	S000001016	YHL024W	RIM4	Regulator of IME2
YKR102W	54.8545	47.4747	266.689	258.399	2.35852	1.58355e-91	3.22412e-89	S000001810	YKR102W	FLO10	FLOcculation
YPL277C	24.136	21.7092	135.114	117.633	2.46187	8.53155e-90	1.68877e-87	S000006198	YPL277C
YPL141C	62.4279	53.1086	311.677	323.847	2.45879	2.19941e-88	4.23594e-86	S000006062	YPL141C	FRK1	Fatty acyl-CoA synthetase and RNA processing-associated Kinase
YKL216W	353.121	368.68	63.5008	71.1326	-2.42281	9.90894e-87	1.85819e-84	S000001699	YKL216W	URA1	URAcil requiring
YBR284W	31.214	28.5449	171.917	218.214	2.70555	2.66112e-86	4.86235e-84	S000000488	YBR284W
YLR286C	3453.42	3631.67	539.572	439.27	-2.85552	4.6952e-86	8.3645e-84	S000004276	YLR286C	CTS1	ChiTinaSe
YFL020C	14.7222	14.6481	85.184	102.554	2.67493	6.33788e-85	1.10155e-82	S000001874	YFL020C	PAU5	seriPAUperin family
YKL096W	928.775	1132.86	158.936	146.528	-2.75449	8.19946e-84	1.39117e-81	S000001579	YKL096W	CWP1	Cell Wall Protein
YGR213C	19.4645	19.2303	89.1666	91.5803	2.22298	1.67048e-83	2.76833e-81	S000003445	YGR213C	RTA1	Resistance To 7-Aminocholesterol
YIL101C	119.123	115.983	624.387	571.193	2.34623	8.04338e-82	1.30266e-79	S000001363	YIL101C	XBP1	XhoI site-Binding Protein
YDL055C	3669.3	4372.56	637.663	607.43	-2.69123	1.69798e-81	2.68885e-79	S000002213	YDL055C	PSA1
YLR234W	19.5353	14.2725	100.967	102.002	2.58238	1.0054e-80	1.5575e-78	S000004224	YLR234W	TOP3	TOPoisomerase
YOR264W	184.24	211.458	46.0215	45.0796	-2.1183	5.12736e-79	7.77395e-77	S000005790	YOR264W	DSE3	Daughter Specific Expression
YOR328W	106.028	92.6208	498.861	503.928	2.33531	5.47524e-79	8.12846e-77	S000005855	YOR328W	PDR10	Pleiotropic Drug Resistance
YJR094C	19.3937	18.9298	88.5766	100.817	2.30385	1.47098e-78	2.13923e-76	S000003854	YJR094C	IME1	Inducer of MEiosis
YMR085W	40.1322	39.8127	155.691	152.529	1.94663	2.0691e-78	2.94888e-76	S000004690	YMR085W
YNL192W	248.65	248.641	1147.07	1198.99	2.23802	9.97802e-75	1.39418e-72	S000005136	YNL192W	CHS1	CHitin Synthase
YNL270C	44.5914	39.6624	164.468	161.844	1.95254	3.75185e-73	5.14148e-71	S000005214	YNL270C	ALP1
YCR010C	168.315	134.161	949.119	875.223	2.59217	4.44608e-73	5.97788e-71	S000000603	YCR010C	ADY2	Accumulation of DYads
YMR058W	58.6058	52.4325	259.608	228.003	2.13421	3.35581e-72	4.42843e-70	S000004662	YMR058W	FET3	FErrous Transport
YMR095C	33.2666	27.7186	135.483	135.318	2.14913	4.92808e-72	6.385e-70	S000004701	YMR095C	SNO1	SNZ proximal Open reading frame
YAL054C	378.956	331.872	2240.74	1904.08	2.54366	6.69797e-72	8.52316e-70	S000000050	YAL054C	ACS1	Acetyl CoA Synthetase
YMR251W	10.5462	9.61514	63.8695	60.3167	2.6209	3.24064e-71	4.05137e-69	S000004863	YMR251W	GTO3	Glutathione Transferase Omega-like
YDR213W	25.3392	23.3618	99.4182	109.265	2.09787	4.26388e-71	5.2387e-69	S000002621	YDR213W	UPC2	UPtake Control
YBR158W	645.301	702.581	149.865	149.055	-2.17275	4.94223e-71	5.9692e-69	S000000362	YBR158W	AMN1	Antagonist of Mitotic exit Network
YNR063W	12.3157	11.0424	65.4921	68.2905	2.51559	8.53348e-71	1.01349e-68	S000005346	YNR063W
YMR147W	14.5807	13.0706	70.6548	72.7905	2.37304	4.34522e-70	5.07608e-68	S000004755	YMR147W
YOR382W	52.4479	56.8645	200.606	193.661	1.85101	1.25329e-69	1.44047e-67	S000005909	YOR382W	FIT2	Facilitator of Iron Transport
YIR019C	8.84749	9.69025	55.9043	55.6587	2.58922	1.69325e-68	1.91526e-66	S000001458	YIR019C	FLO11	FLOcculation
YJL056C	34.9653	33.5779	124.273	130.976	1.8961	1.42505e-67	1.58671e-65	S000003592	YJL056C	ZAP1	Zinc-responsive Activator Protein
YDR384C	24.2067	23.8125	95.5093	90.2382	1.95133	3.25068e-67	3.56375e-65	S000002792	YDR384C	ATO3	Ammonia (Ammonium) Transport Outward
YDL234C	258.276	242.857	1072.58	1110.17	2.12278	6.82086e-67	7.36446e-65	S000002393	YDL234C	GYP7	Gtpase-activating protein for Ypt7 Protein
YOR058C	60.4461	46.1977	292.354	352.505	2.59512	1.08928e-66	1.15854e-64	S000005584	YOR058C	ASE1	Anaphase Spindle Elongation
YIL159W	56.8363	53.1837	239.843	305.215	2.30802	4.0252e-65	4.21818e-63	S000001421	YIL159W	BNR1	BNi1 Related
YMR015C	109.497	105.917	405.269	414.006	1.92706	2.73988e-63	2.82962e-61	S000004617	YMR015C	ERG5	ERGosterol biosynthesis
YMR084W	10.9709	10.5917	64.4596	57.5535	2.49947	5.48554e-63	5.58428e-61	S000004689	YMR084W
YGL147C	455.469	631.369	88.2816	86.0539	-2.63993	1.94917e-62	1.9563e-60	S000003115	YGL147C	RPL9A	Ribosomal Protein of the Large subunit
YOL101C	159.043	135.664	38.2775	38.6848	-1.93716	3.10629e-62	3.07436e-60	S000005461	YOL101C	IZH4	Implicated in Zinc Homeostasis
YOL152W	41.6186	36.8079	137.622	140.134	1.82335	3.56239e-62	3.47747e-60	S000005512	YOL152W	FRE7	Ferric REductase
YJR106W	39.0705	38.1601	131.795	131.055	1.76661	4.45902e-62	4.29391e-60	S000003867	YJR106W	ECM27	ExtraCellular Mutant
YNL301C	134.057	163.532	35.4011	37.1058	-2.03683	9.42093e-60	8.95114e-58	S000005245	YNL301C	RPL18B	Ribosomal Protein of the Large subunit
YDR040C	17.7658	16.0002	71.2448	72.4748	2.08792	1.14354e-59	1.07221e-57	S000002447	YDR040C	ENA1	Exitus NAtru (Latin
YPR002W	231.521	192.303	1017.12	945.172	2.21081	2.45459e-59	2.27161e-57	S000006206	YPR002W	PDH1	prpD Homolog
YLR198C	23.2866	26.8172	1.32754	2.28951	-3.79488	1.7174e-58	1.569e-56	S000004188	YLR198C
YOR338W	52.0233	39.0615	200.901	193.819	2.11423	1.98744e-58	1.79272e-56	S000005865	YOR338W
YJR150C	2.54808	2.25355	24.6333	29.211	3.47922	3.08705e-58	2.74979e-56	S000003911	YJR150C	DAN1	Delayed ANaerobic
YFR052C-A	182.471	200.791	60.3294	57.0008	-1.70713	5.12243e-57	4.50648e-55	S000028768	YFR052C-A
YDL024C	29.3737	30.3478	96.2468	98.5278	1.70535	5.27077e-57	4.58043e-55	S000002182	YDL024C	DIA3	Digs Into Agar
YBR005W	69.0105	70.9116	272.589	236.53	1.8635	5.93093e-57	5.09203e-55	S000000209	YBR005W	RCR1	Resistance to Congo Red
YNR067C	811.563	812.629	218.528	194.924	-1.97374	1.75779e-56	1.49119e-54	S000005350	YNR067C	DSE4	Daughter Specific Expression
YDR111C	50.8908	49.2025	157.535	152.686	1.63167	2.05655e-56	1.72411e-54	S000002518	YDR111C	ALT2	ALanine Transaminase
YFR032C-A	189.124	198.688	63.427	57.5535	-1.67983	2.61236e-56	2.16461e-54	S000006437	YFR032C-A	RPL29	Ribosomal Protein of the Large subunit
YOR180C	13.9437	14.3476	62.247	68.8431	2.21128	4.92593e-56	4.03473e-54	S000005706	YOR180C	DCI1	delta(3
YDL003W	125.847	148.734	37.9825	34.1058	-1.92812	1.14566e-55	9.27723e-54	S000002161	YDL003W	MCD1	Mitotic Chromosome Determinant
YOL015W	9.55529	9.69025	47.939	52.4218	2.38123	1.96113e-55	1.57023e-53	S000005375	YOL015W	IRC10	Increased Recombination Centers
YOR188W	48.1304	42.3667	144.997	150.002	1.70377	2.62682e-55	2.07985e-53	S000005714	YOR188W	MSB1	Multicopy Suppression of a Budding defect
YKL050C	33.762	30.7234	123.461	107.054	1.8373	1.34717e-54	1.05494e-52	S000001533	YKL050C
YLR056W	116.645	127.401	474.228	431.296	1.89174	2.08371e-54	1.61397e-52	S000004046	YLR056W	ERG3	ERGosterol biosynthesis
YBL034C	46.8563	47.3245	145.218	167.45	1.73067	1.65384e-53	1.26723e-51	S000000130	YBL034C	STU1	Suppressor of TUbulin
YKL107W	36.3809	29.3712	121.913	115.265	1.84937	2.59279e-53	1.96556e-51	S000001590	YKL107W
YGR138C	20.1723	20.8078	73.1623	75.5537	1.85924	6.3216e-53	4.74186e-51	S000003370	YGR138C	TPO2	Transporter of POlyamines
YGR020C	235.768	277.562	74.1211	72.5537	-1.80689	7.83966e-53	5.81931e-51	S000003252	YGR020C	VMA7	Vacuolar Membrane Atpase
YHR183W	377.257	525.903	85.3315	86.7644	-2.39157	9.07007e-53	6.66323e-51	S000001226	YHR183W	GND1	6-phosphoGlucoNateDehydrogenase
YDR497C	396.58	346.07	1590.99	1435.84	2.02697	2.05267e-52	1.49258e-50	S000002905	YDR497C	ITR1	myo-Inositol TRansporter
YOR028C	25.9055	26.3665	82.5289	85.7381	1.68627	3.31353e-52	2.38507e-50	S000005554	YOR028C	CIN5	Chromosome INstability
YJL189W	64.1974	64.3763	16.078	15.4739	-2.02571	3.39241e-52	2.41743e-50	S000003725	YJL189W	RPL39	Ribosomal Protein of the Large subunit
YGR142W	221.824	220.247	779.784	884.539	1.91249	4.42928e-52	3.12506e-50	S000003374	YGR142W	BTN2	BaTteN disease
YLR120C	78.495	92.0199	336.901	306.557	1.91629	9.62212e-52	6.72228e-50	S000004110	YLR120C	YPS1	YaPSin
YIL166C	53.4389	56.0382	163.656	158.45	1.55707	3.4777e-51	2.40603e-49	S000001428	YIL166C
YFL011W	7.71502	6.1597	40.0475	39.4743	2.5146	4.71958e-51	3.23382e-49	S000001883	YFL011W	HXT10	HeXose Transporter
YOL158C	62.9942	58.8176	190.06	175.345	1.58455	1.22104e-50	8.28678e-49	S000005518	YOL158C	ENB1	ENteroBactin
YER020W	318.581	291.459	1366.7	1141.91	2.03986	1.61593e-50	1.08633e-48	S000000822	YER020W	GPA2	G Protein Alpha subunit
YJL133C-A	52.7311	45.5217	151.266	157.187	1.64947	1.79252e-50	1.19378e-48	S000028805	YJL133C-A
YPL147W	97.2517	89.5409	304.007	308.847	1.71378	1.0263e-49	6.77166e-48	S000006068	YPL147W	PXA1	PeroXisomal ABC-transporter
YHR084W	38.0088	42.1413	122.355	124.897	1.62555	1.13136e-49	7.39638e-48	S000001126	YHR084W	STE12	STErile
YDR535C	3.46822	3.07985	24.1908	24.0793	2.87661	1.21686e-49	7.88303e-48	S000002943	YDR535C
YIL160C	135.473	125.823	426.657	438.085	1.72636	1.29488e-49	8.31291e-48	S000001422	YIL160C	POT1	Peroxisomal Oxoacyl Thiolase
YDL223C	318.014	251.947	1464.21	1225.36	2.2383	6.92202e-49	4.40414e-47	S000002382	YDL223C	HBT1	HuB1 Target
YOL084W	150.549	122.142	533.598	511.665	1.93818	3.70812e-48	2.33842e-46	S000005444	YOL084W	PHM7	PHosphate Metabolism
YDR223W	40.6277	39.1366	113.874	114.791	1.51892	4.24801e-48	2.65538e-46	S000002631	YDR223W	CRF1	Co-Repressor with FHL1
YLL009C	203.28	172.922	51.9217	60.0009	-1.74971	1.34167e-47	8.31369e-46	S000003932	YLL009C	COX17	Cytochrome c OXidase
YOR342C	140.357	151.514	51.7004	47.606	-1.55452	3.30965e-47	2.03315e-45	S000005869	YOR342C
YER011W	8.13969	7.51182	37.6137	38.8427	2.28581	9.99711e-47	6.08884e-45	S000000813	YER011W	TIR1	TIp1-Related
YOR167C	423.689	510.428	129.878	127.818	-1.85775	1.06412e-46	6.42622e-45	S000005693	YOR167C	RPS28A	Ribosomal Protein of the Small subunit
YBL043W	233.857	227.383	79.0625	81.0012	-1.5269	1.08195e-46	6.47898e-45	S000000139	YBL043W	ECM13	ExtraCellular Mutant
YDL233W	63.702	61.6721	170.81	179.845	1.48341	1.29325e-46	7.67972e-45	S000002392	YDL233W	MFG1	Morphogenetic regulator of Filamentous Growth
YOR315W	18.332	20.5073	70.876	67.422	1.83289	1.76616e-46	1.04013e-44	S000005842	YOR315W	SFG1	SuperFicial pseudohyphal Growth
YPR001W	150.407	114.33	587.732	535.508	2.08466	2.44377e-46	1.4274e-44	S000006205	YPR001W	CIT3	CITrate synthase
YNL093W	94.0666	78.799	289.699	287.294	1.73836	4.39272e-46	2.54492e-44	S000005037	YNL093W	YPT53	Yeast Protein Two
YEL020C-B	131.721	115.983	32.746	39.4743	-1.77929	5.42206e-46	3.11593e-44	S000028544	YEL020C-B
YLR414C	138.587	138.218	423.043	428.691	1.62145	6.84057e-46	3.87942e-44	S000004406	YLR414C	PUN1	Plasma membrane protein Upregulated during Nitrogen stress
YLR431C	41.831	41.6155	124.051	116.923	1.5299	6.85949e-46	3.87942e-44	S000004423	YLR431C	ATG23	AuTophaGy related
YDL184C	326.154	250.519	71.3185	76.1064	-1.96798	3.7564e-45	2.10772e-43	S000002343	YDL184C	RPL41A	Ribosomal Protein of the Large subunit
YPL143W	116.787	157.373	32.0823	33.711	-2.05858	4.42932e-45	2.46589e-43	S000006064	YPL143W	RPL33A	Ribosomal Protein of the Large subunit
YEL020W-A	156.07	134.762	47.4228	49.027	-1.59263	6.49046e-45	3.58535e-43	S000007256	YEL020W-A	TIM9	Translocase of the Inner Mitochondrial membrane
YGR283C	136.676	163.007	46.6852	48.7902	-1.64998	7.13937e-45	3.91347e-43	S000003515	YGR283C
YMR189W	78.495	85.109	247.66	232.819	1.5545	7.30577e-45	3.97412e-43	S000004801	YMR189W	GCV2	GlyCine cleaVage
YLR110C	5075.42	5954.62	1508.83	1473.65	-1.88684	9.14323e-45	4.93596e-43	S000004100	YLR110C	CCW12	Covalently linked Cell Wall protein
YDR447C	612.954	686.956	192.715	199.819	-1.72749	1.12308e-44	6.01732e-43	S000002855	YDR447C	RPS17B	Ribosomal Protein of the Small subunit
YGR060W	177.516	182.012	597.099	549.719	1.67348	1.17325e-44	6.23925e-43	S000003292	YGR060W	ERG25	ERGosterol biosynthesis
YOR373W	72.2663	67.3811	187.405	190.266	1.43489	1.55692e-44	8.21824e-43	S000005900	YOR373W	NUD1
YJR154W	15.0054	13.8969	56.5681	53.9218	1.93345	2.39414e-44	1.25446e-42	S000003915	YJR154W
YGL006W	345.123	303.553	1095.07	1093.67	1.75442	3.45551e-44	1.79737e-42	S000002974	YGL006W	PMC1	Plasma Membrane Calcium
YDL085W	212.34	192.228	673.801	640.588	1.69981	4.59577e-44	2.37315e-42	S000002243	YDL085W	NDE2	NADH Dehydrogenase
YLR070C	46.7148	43.4183	134.451	124.107	1.51998	5.28638e-44	2.71013e-42	S000004060	YLR070C	XYL2
YJL190C	887.935	1304.5	201.786	215.608	-2.393	8.01662e-44	4.08046e-42	S000003726	YJL190C	RPS22A	Ribosomal Protein of the Small subunit
YLR367W	334.435	408.493	108.121	106.502	-1.79119	8.31481e-44	4.20222e-42	S000004359	YLR367W	RPS22B	Ribosomal Protein of the Small subunit
YBR230W-A	152.318	151.964	49.1928	57.0008	-1.51939	1.37217e-43	6.88598e-42	S000029722	YBR230W-A
YFR022W	43.4589	41.3902	116.824	119.607	1.47787	1.53309e-43	7.63971e-42	S000001918	YFR022W	ROG3	Revertant Of Glycogen synthase kinase mutation
YER145C	137.738	120.264	474.08	413.217	1.78183	1.55886e-43	7.71418e-42	S000000947	YER145C	FTR1	Fe TRansporter
YPR111W	38.8582	34.5544	101.852	109.186	1.52216	2.03204e-43	9.98644e-42	S000006315	YPR111W	DBF20	DumbBell Forming
YJR115W	49.6167	45.3714	130.91	131.923	1.46763	2.04735e-43	9.99274e-42	S000003876	YJR115W
YBR004C	64.976	60.0946	180.693	223.503	1.69161	5.43704e-43	2.63567e-41	S000000208	YBR004C	GPI18	GlycosylPhosphatidylInositol
YAR020C	4.9546	5.03292	28.0259	26.5267	2.44783	1.05174e-42	5.06397e-41	S000000073	YAR020C	PAU7	seriPAUperin family
YLR213C	13.0235	10.817	49.1928	49.6586	2.0491	1.12387e-42	5.37495e-41	S000004203	YLR213C	CRR1	CRH-Related
YJL165C	116.504	111.776	331.001	346.821	1.56989	2.16017e-42	1.02622e-40	S000003701	YJL165C	HAL5	HALotolerance
YJR092W	35.4608	27.5684	106.72	101.291	1.72091	2.94866e-42	1.39153e-40	S000003852	YJR092W	BUD4	BUD site selection
YCR048W	56.1285	50.179	172.728	148.423	1.59466	3.20889e-42	1.50438e-40	S000000644	YCR048W	ARE1	Acyl-coenzyme A: cholesterol acyl transferase-Related Enzyme
YEL040W	254.949	300.773	88.0603	88.896	-1.65075	3.63105e-42	1.69117e-40	S000000766	YEL040W	UTR2	Unidentified TRanscript
YNL300W	111.125	153.917	32.3035	30.5531	-2.07508	4.50353e-42	2.0839e-40	S000005244	YNL300W	TOS6
YBL003C	219.206	260.51	79.2838	74.6853	-1.63904	5.10918e-42	2.3489e-40	S000000099	YBL003C	HTA2	Histone h Two A
YGL158W	1.69872	1.50236	14.4555	16.0266	3.24079	5.56355e-42	2.5414e-40	S000003126	YGL158W	RCK1	Radiation sensitivity Complementing Kinase
YNL327W	1041.46	1038.28	341.99	305.136	-1.68417	7.01817e-42	3.18544e-40	S000005271	YNL327W	EGT2
YGR161C	161.874	160.302	464.714	495.639	1.5756	1.43983e-41	6.49381e-40	S000003393	YGR161C	RTS3
YOR192C	27.9581	26.3665	80.8326	77.7643	1.54506	1.67356e-41	7.50049e-40	S000005718	YOR192C	THI72	THI7 homologue 2
YOL143C	371.099	388.962	133.639	125.923	-1.5498	1.71472e-41	7.63692e-40	S000005503	YOL143C	RIB4	RIBoflavin biosynthesis
YPR154W	104.754	110.799	309.244	317.215	1.53919	3.06822e-41	1.35802e-39	S000006358	YPR154W	PIN3	Psi+ INducibility
YHR092C	134.977	142.725	47.1278	53.2903	-1.46797	3.57355e-41	1.57192e-39	S000001134	YHR092C	HXT4	HeXose Transporter
YJL051W	35.1776	30.8736	96.2468	91.1066	1.50312	5.01779e-41	2.19367e-39	S000003587	YJL051W	IRC8	Increased Recombination Centers
YPL249C-A	90.7399	119.663	29.3534	27.0793	-1.8972	9.22195e-41	4.00705e-39	S000006438	YPL249C-A	RPL36B	Ribosomal Protein of the Large subunit
YHR141C	510.819	603.124	167.934	173.766	-1.70481	1.23931e-40	5.35232e-39	S000001183	YHR141C	RPL42B	Ribosomal Protein of the Large subunit
YHL020C	116.999	99.6068	364.853	333.242	1.68803	1.25197e-40	5.37441e-39	S000001012	YHL020C	OPI1	OverProducer of Inositol
YOR369C	1111.39	1354.01	350.471	354.953	-1.80521	1.28918e-40	5.50104e-39	S000005896	YOR369C	RPS12	Ribosomal Protein of the Small subunit
YNL172W	64.4098	57.3152	160.559	168.792	1.43524	2.09639e-40	8.8922e-39	S000005116	YNL172W	APC1	Anaphase Promoting Complex subunit
YJR005C-A	1.20326	1.12677	14.8242	21.7108	3.95732	2.21457e-40	9.33789e-39	S000028523	YJR005C-A	LSO1	Late-annotated Small Open reading frame
YLL031C	58.3227	48.6015	157.093	149.844	1.52049	2.59651e-40	1.08839e-38	S000003954	YLL031C	GPI13	GlycosylPhosphatidylInositol anchor biosynthesis
YCL012C	221.258	229.411	76.5549	85.6592	-1.47444	2.76996e-40	1.15431e-38	S000029705	YCL012C
YDR207C	42.9634	43.3432	114.537	110.212	1.38077	2.79716e-40	1.15887e-38	S000002615	YDR207C	UME6	Unscheduled Meiotic gene Expression
YMR036C	65.0468	59.4185	161.591	180.871	1.45947	9.15663e-40	3.77168e-38	S000004639	YMR036C	MIH1	Mitotic Inducer Homolog
YIL099W	47.9888	43.2681	151.487	126.712	1.60782	1.38112e-39	5.65623e-38	S000001361	YIL099W	SGA1	Sporulation-specific GlycoAmylase
YIL066C	25.9055	26.7421	73.8999	77.6854	1.52539	3.17511e-39	1.29291e-37	S000001328	YIL066C	RNR3	RiboNucleotide Reductase
YJL188C	77.2209	81.6535	27.9521	23.2109	-1.63258	5.43563e-39	2.20081e-37	S000003724	YJL188C	BUD19	BUD site selection
YDL133C-A	167.465	145.729	38.13	51.3955	-1.80792	1.2875e-38	5.18346e-37	S000002293	YDL133C-A	RPL41B	Ribosomal Protein of the Large subunit
YER074W-A	171.571	153.992	57.6006	62.922	-1.43413	1.48036e-38	5.92642e-37	S000007651	YER074W-A	YOS1	Yip One Suppressor
YHL028W	61.7201	51.6062	177.079	156.792	1.55818	1.68953e-38	6.72603e-37	S000001020	YHL028W	WSC4	cell Wall integrity and Stress response Component
YKL056C	1408.24	1431.23	472.236	486.797	-1.56596	1.79023e-38	7.08732e-37	S000001539	YKL056C	TMA19	Translation Machinery Associated
YGR144W	7.078	7.36159	32.0823	31.0268	2.12708	1.8228e-38	7.17639e-37	S000003376	YGR144W	THI4	THIamine metabolism
YHR005C-A	337.054	359.516	114.464	127.423	-1.52607	2.31033e-38	9.04582e-37	S000003530	YHR005C-A	TIM10	Translocase of the Inner Membrane
YLR267W	137.101	120.415	367.729	372.716	1.52342	8.52744e-38	3.32058e-36	S000004257	YLR267W	BOP2	Bypass Of Pam1
YER152C	219.984	224.303	88.3553	83.1328	-1.37303	9.21175e-38	3.56755e-36	S000000954	YER152C
YDL081C	412.647	520.119	133.123	142.186	-1.7604	9.78505e-38	3.7691e-36	S000002239	YDL081C	RPP1A	Ribosomal Protein P1 Alpha
YPR073C	115.867	107.119	39.9	43.9743	-1.41133	1.04997e-37	4.02264e-36	S000006277	YPR073C	LTP1
YMR306W	35.6731	36.207	94.2555	90.8698	1.36487	1.2502e-37	4.76414e-36	S000004923	YMR306W	FKS3
YMR244W	4.10524	2.32867	23.1582	22.5003	2.81601	1.76514e-37	6.69064e-36	S000004858	YMR244W
YER009W	267.973	307.759	93.518	101.765	-1.55986	1.90888e-37	7.1972e-36	S000000811	YER009W	NTF2	Nuclear Transport Factor
YML118W	44.7329	37.0333	116.676	111.949	1.48229	2.01122e-37	7.54315e-36	S000004587	YML118W	NGL3
YDL039C	23.6405	20.8829	67.8522	66.8694	1.59599	5.96317e-37	2.22479e-35	S000002197	YDL039C	PRM7	Pheromone-Regulated Membrane protein
YPL119C	89.2535	79.0244	229.222	220.345	1.41728	6.35394e-37	2.35824e-35	S000006040	YPL119C	DBP1	Dead Box Protein
YOL085W-A	30.2938	25.7656	81.7176	99.7909	1.69316	9.26256e-37	3.41995e-35	S000028708	YOL085W-A
YHR033W	66.6039	58.0664	224.06	175.187	1.67891	1.20667e-36	4.43234e-35	S000001075	YHR033W
YBR295W	77.3625	69.4844	184.381	209.45	1.42257	1.26636e-36	4.62774e-35	S000000499	YBR295W	PCA1	P-type Cation-transporting ATPase
YLR185W	232.654	313.168	74.4161	80.6854	-1.81511	1.28102e-36	4.65744e-35	S000004175	YLR185W	RPL37A	Ribosomal Protein of the Large subunit
YGR108W	31.4971	26.9674	80.0213	81.5538	1.46505	1.48343e-36	5.36594e-35	S000003340	YGR108W	CLB1	CycLin B
YHL040C	55.9869	53.1837	147.21	132.949	1.35953	1.54224e-36	5.55051e-35	S000001032	YHL040C	ARN1	AFT1 ReguloN
YCR007C	47.9888	41.9911	117.93	131.844	1.47182	2.06598e-36	7.39809e-35	S000000600	YCR007C
YDR523C	8.98905	9.91561	36.2124	40.5006	2.02015	2.15164e-36	7.66628e-35	S000002931	YDR523C	SPS1	SPorulation Specific
YBR301W	0.778579	0.600946	9.21904	10.737	3.83016	2.46798e-36	8.74968e-35	S000000505	YBR301W	PAU24	seriPAUperin family
YHR137W	83.4496	79.9258	210.563	199.74	1.32835	2.70919e-36	9.55726e-35	S000001179	YHR137W	ARO9	AROmatic amino acid requiring
YBR294W	43.6005	44.47	106.867	115.66	1.33691	2.8129e-36	9.87424e-35	S000000498	YBR294W	SUL1	SULfate
YMR001C	28.2412	25.9158	73.9736	76.4222	1.47241	2.91185e-36	1.01715e-34	S000004603	YMR001C	CDC5	Cell Division Cycle
YMR316C-A	1.0617	1.57748	11.8004	13.3423	3.24881	3.92644e-36	1.36487e-34	S000004933	YMR316C-A
YLR179C	143.4	186.519	50.1516	53.5271	-1.66976	4.87609e-36	1.68675e-34	S000004169	YLR179C
YNL162W	296.922	394.596	100.082	97.7383	-1.8053	5.32604e-36	1.8335e-34	S000005106	YNL162W	RPL42A	Ribosomal Protein of the Large subunit
YHR021C	356.66	502.015	107.9	113.212	-1.9572	5.89333e-36	2.01903e-34	S000001063	YHR021C	RPS27B	Ribosomal Protein of the Small subunit
YOL014W	7.21956	8.71372	33.4836	38.369	2.17308	7.30901e-36	2.49206e-34	S000005374	YOL014W
YDR308C	74.3897	74.4422	28.0259	27.0793	-1.43279	7.48186e-36	2.53884e-34	S000002716	YDR308C	SRB7	Suppressor of RNA polymerase B
YIL169C	401.676	299.421	1578.67	1295.94	2.03556	7.77766e-36	2.62671e-34	S000001431	YIL169C		Condition Specific Secretion
YER158C	82.2463	79.2497	209.088	195.477	1.32477	1.0646e-35	3.57847e-34	S000000960	YER158C
YDR086C	155.857	176.903	60.1082	66.0799	-1.39901	1.26332e-35	4.22649e-34	S000002493	YDR086C	SSS1	Sec Sixty-one Suppressor
YPR113W	197.972	211.308	81.4963	82.6591	-1.31788	1.35523e-35	4.51279e-34	S000006317	YPR113W	PIS1	Phosphatidyl Inositol Synthase
TLC1	278.944	268.623	107.088	98.8436	-1.41059	1.52748e-35	5.06272e-34	S000006657	TLC1	TLC1	TeLomerase Component
YGR206W	103.056	93.2969	35.0324	39.3953	-1.40046	2.55189e-35	8.41887e-34	S000003438	YGR206W	MVB12	MultiVesicular Body sorting factor of 12 kilodaltons
YGR249W	22.0833	17.127	71.2448	64.6588	1.7913	3.31516e-35	1.08866e-33	S000003481	YGR249W	MGA1
YKL178C	6.44098	5.40851	26.6246	30.1583	2.25599	3.39965e-35	1.11128e-33	S000001661	YKL178C	STE3	STErile
YMR195W	86.0684	76.9962	31.1235	28.0267	-1.46218	3.89663e-35	1.26792e-33	S000004808	YMR195W	ICY1	Interacting with the CYtoskeleton
YLR061W	63.2773	87.8883	18.9544	16.9739	-2.07099	4.32078e-35	1.39954e-33	S000004051	YLR061W	RPL22A	Ribosomal Protein of the Large subunit
YDR270W	61.9325	52.3574	149.054	148.107	1.37769	5.38289e-35	1.73568e-33	S000002678	YDR270W	CCC2	Cross-Complements Ca(2+) phenotype of csg1
YGR154C	40.7693	38.2352	99.5657	95.054	1.3002	5.60754e-35	1.79997e-33	S000003386	YGR154C	GTO1	Glutathione Transferase Omega-like
YKL080W	256.436	313.243	93.7392	97.5804	-1.57402	9.06936e-35	2.89813e-33	S000001563	YKL080W	VMA5	Vacuolar Membrane Atpase
YLR448W	264.859	352.83	89.6091	91.4224	-1.77042	1.00483e-34	3.19663e-33	S000004440	YLR448W	RPL6B	Ribosomal Protein of the Large subunit
YPR159W	155.928	150.988	415.004	397.348	1.40419	1.18425e-34	3.75065e-33	S000006363	YPR159W	KRE6	Killer toxin REsistant
YPR192W	50.183	52.0569	184.16	139.107	1.66111	1.38993e-34	4.38258e-33	S000006396	YPR192W	AQY1	AQuaporin of Yeast
YLL051C	60.0214	55.6626	137.179	142.897	1.27501	1.77291e-34	5.56555e-33	S000003974	YLL051C	FRE6	Ferric REductase
YLR390W	98.2426	90.8931	39.0887	35.9216	-1.33364	2.67726e-34	8.36762e-33	S000004382	YLR390W	ECM19	ExtraCellular Mutant
YNL278W	54.6421	48.9771	138.064	126.87	1.35388	3.8428e-34	1.1958e-32	S000005222	YNL278W	CAF120	CCR4 Associated Factor
YNR015W	40.9816	39.9629	109.375	96.3962	1.34611	3.89994e-34	1.2083e-32	S000005298	YNR015W	SMM1	Suppressor of Mitochondrial Mutation
YLR337C	136.676	136.264	355.56	346.584	1.36314	4.35902e-34	1.34469e-32	S000004329	YLR337C	VRP1	VeRProlin
YKL033W-A	115.796	130.48	48.8241	47.2902	-1.35682	4.63086e-34	1.42239e-32	S000007242	YKL033W-A
YMR074C	336.134	315.797	123.535	124.581	-1.39371	4.75392e-34	1.45392e-32	S000004678	YMR074C	SDD2	Suppressor of Degenerative Death
YOR182C	156.141	187.495	63.2058	65.0536	-1.42154	6.44167e-34	1.96168e-32	S000005708	YOR182C	RPS30B	Ribosomal Protein of the Small subunit
YLL057C	34.9653	34.93	84.0777	95.7646	1.36273	6.6147e-34	2.0058e-32	S000003980	YLL057C	JLP1	dnaJ-Like Protein
YLL050C	536.441	575.706	200.975	210.161	-1.43565	7.56379e-34	2.28388e-32	S000003973	YLL050C	COF1	COFilin
YLR340W	301.593	410.596	101.262	102.712	-1.80367	8.78031e-34	2.64002e-32	S000004332	YLR340W	RPP0	Ribosomal Protein P0
YDL235C	101.428	110.048	44.1777	43.6585	-1.26709	1.5744e-33	4.71394e-32	S000002394	YDL235C	YPD1	tYrosine Phosphatase Dependent
YGL183C	2.40652	2.40378	14.7505	17.6055	2.74373	1.66337e-33	4.95948e-32	S000003151	YGL183C	MND1	Meiotic Nuclear Divisions
YPL220W	174.473	214.688	66.3771	73.1063	-1.48025	1.7973e-33	5.33647e-32	S000006141	YPL220W	RPL1A	Ribosomal Protein of the Large subunit
YIL052C	349.795	473.32	117.635	122.765	-1.77553	2.21174e-33	6.53977e-32	S000001314	YIL052C	RPL34B	Ribosomal Protein of the Large subunit
YGR059W	5.80396	5.85922	24.8545	24.8688	2.09032	2.2286e-33	6.56239e-32	S000003291	YGR059W	SPR3	SPorulation Regulated
YLR121C	140.286	147.908	381.005	364.584	1.37141	2.53208e-33	7.42534e-32	S000004111	YLR121C	YPS3	YaPSin
YKL149C	28.8074	30.5731	79.6525	74.8432	1.37995	2.74335e-33	8.01193e-32	S000001632	YKL149C	DBR1	DeBRanching
YHR097C	323.677	303.778	908.186	837.091	1.47583	2.89646e-33	8.42456e-32	S000001139	YHR097C
YGR146C	76.23	80.3765	179.587	197.529	1.26777	2.92067e-33	8.46045e-32	S000003378	YGR146C	ECL1	Extends Chronological Lifespan
YCR068W	82.1047	63.3998	250.979	212.608	1.67121	3.70301e-33	1.0682e-31	S000000664	YCR068W	ATG15	AuTophaGy related
YDL219W	44.1667	49.578	11.5054	13.8949	-1.8847	3.71755e-33	1.0682e-31	S000002378	YDL219W	DTD1	D-Tyr-tRNA(Tyr) Deacylase
YMR158W	156.707	157.072	65.0496	68.7642	-1.22969	4.05312e-33	1.15994e-31	S000004767	YMR158W	MRPS8	Mitochondrial Ribosomal Protein
YER070W	310.441	430.878	108.195	97.2646	-1.85084	4.40509e-33	1.25563e-31	S000000872	YER070W	RNR1	RiboNucleotide Reductase
YAL018C	15.5008	11.2677	50.8154	53.685	1.96146	5.29753e-33	1.50399e-31	S000000016	YAL018C	LDS1	Lipid Droplets in Sporulation
YGR208W	54.4298	71.137	16.2993	16.1844	-1.94937	5.67983e-33	1.60613e-31	S000003440	YGR208W	SER2	SERine requiring
YDR533C	695.696	721.586	233.869	268.267	-1.49707	5.70247e-33	1.60616e-31	S000002941	YDR533C	HSP31	Heat-Shock Protein
YGR212W	21.1632	22.9862	61.8782	71.3695	1.59331	5.84222e-33	1.63904e-31	S000003444	YGR212W	SLI1	Sphingosine-Like Immunosuppressant resistant gene
YDR019C	151.469	149.11	390.592	376.348	1.35132	6.82147e-33	1.90627e-31	S000002426	YDR019C	GCV1	GlyCine cleaVage
YDL130W	335.497	461.076	117.93	111.475	-1.79561	7.96127e-33	2.21609e-31	S000002288	YDL130W	RPP1B	Ribosomal Protein P1 Beta
YBR157C	62.8526	60.6204	146.251	141.081	1.21833	9.87565e-33	2.73828e-31	S000000361	YBR157C	ICS2	Increased Copper Sensitivity
YIL057C	253.605	197.411	739.515	704.063	1.67819	1.01403e-32	2.80078e-31	S000001319	YIL057C	RGI2	Respiratory growth induced
YLR420W	119.335	130.856	50.3729	52.3429	-1.28423	1.14323e-32	3.14543e-31	S000004412	YLR420W	URA4	URAcil requiring
YAL051W	85.0775	81.0526	194.411	199.819	1.24641	1.19298e-32	3.26969e-31	S000000048	YAL051W	OAF1	Oleate-Activated transcription Factor
YPL276W	1.69872	1.57748	11.6529	13.816	2.94873	1.32955e-32	3.63004e-31	S000006197	YPL276W
YMR232W	13.9437	13.0706	43.0714	46.3428	1.7251	1.33664e-32	3.63545e-31	S000004845	YMR232W	FUS2	cell FUSion
YKL006W	286.517	390.69	101.041	93.9488	-1.79583	1.56834e-32	4.24943e-31	S000001489	YKL006W	RPL14A	Ribosomal Protein of the Large subunit
YER015W	103.905	101.41	253.856	241.346	1.27011	1.86848e-32	5.04349e-31	S000000817	YER015W	FAA2	Fatty Acid Activation
YGL045W	126.271	115.983	315.218	315.478	1.38019	2.38395e-32	6.41059e-31	S000003013	YGL045W	RIM8	Regulator of IME2
YJL144W	109.992	114.63	293.903	276.951	1.34571	3.07723e-32	8.24375e-31	S000003680	YJL144W
YGL236C	36.027	36.6577	99.1969	86.5276	1.3538	3.57737e-32	9.5477e-31	S000003205	YGL236C	MTO1	Mitochondrial Translation Optimization
YDR256C	321.836	270.2	899.41	841.512	1.55597	3.81133e-32	1.01341e-30	S000002664	YDR256C	CTA1	CaTalase A
YOL105C	41.6894	43.3432	118.52	100.107	1.36289	3.95213e-32	1.04695e-30	S000005465	YOL105C	WSC3	cell Wall integrity and Stress response Component
YGR209C	738.801	703.407	253.044	279.004	-1.43873	5.25972e-32	1.38818e-30	S000003441	YGR209C	TRX2	ThioRedoXin
YKR009C	250.136	220.472	675.277	627.878	1.46929	5.74784e-32	1.51141e-30	S000001717	YKR009C	FOX2	Fatty acid OXidation
YOL002C	126.767	127.325	51.4791	56.0535	-1.24094	5.86525e-32	1.53661e-30	S000005362	YOL002C	IZH2	Implicated in Zinc Homeostasis
YFL055W	42.8219	34.7797	99.7132	102.791	1.38234	8.58898e-32	2.24194e-30	S000001839	YFL055W	AGP3	high-Affinity Glutamine Permease
YLR131C	52.094	42.3667	130.984	121.739	1.41884	1.03303e-31	2.68663e-30	S000004121	YLR131C	ACE2	Activator of CUP1 Expression
YDR348C	94.2081	97.6537	224.723	231.951	1.25107	1.34813e-31	3.49337e-30	S000002756	YDR348C	PAL1	Pears And Lemons
YLR154W-F	59.6675	43.0428	153.11	170.45	1.65413	1.41414e-31	3.65114e-30	S000028843	YLR154W-F
YCL036W	27.4626	25.2397	79.1363	68.6852	1.48753	1.44969e-31	3.72943e-30	S000000541	YCL036W	GFD2	Great for Full DEAD box protein activity
YEL073C	40.5569	35.606	95.0668	116.686	1.47384	2.91144e-31	7.46293e-30	S000000799	YEL073C
YGR148C	516.127	654.505	183.57	197.687	-1.61841	2.98961e-31	7.63582e-30	S000003380	YGR148C	RPL24B	Ribosomal Protein of the Large subunit
YEL033W	210.358	239.477	92.7067	85.6592	-1.33406	3.90986e-31	9.9506e-30	S000000759	YEL033W	MTC7	Maintenance of Telomere Capping
YBR108W	106.807	98.2547	273.4	246.714	1.34262	3.99857e-31	1.01402e-29	S000000312	YBR108W	AIM3	Altered Inheritance rate of Mitochondria
YBL087C	294.728	388.737	111.44	104.37	-1.66277	4.0751e-31	1.02976e-29	S000000183	YBL087C	RPL23A	Ribosomal Protein of the Large subunit
YOR234C	296.356	405.338	101.188	108.317	-1.74374	5.12386e-31	1.2902e-29	S000005760	YOR234C	RPL33B	Ribosomal Protein of the Large subunit
YPL164C	69.0105	58.0664	171.843	154.423	1.3598	5.21108e-31	1.30754e-29	S000006085	YPL164C	MLH3	MutL Homolog
YLR167W	1884.3	2231.01	711.415	713.221	-1.53038	5.66418e-31	1.41624e-29	S000004157	YLR167W	RPS31	Ribosomal Protein of the Small subunit
YGL103W	328.773	415.103	130.615	120.318	-1.56743	6.16499e-31	1.53607e-29	S000003071	YGL103W	RPL28	Ribosomal Protein of the Large subunit
YMR292W	77.7164	74.7427	27.3621	31.5005	-1.37404	6.91119e-31	1.716e-29	S000004906	YMR292W	GOT1	GOlgi Transport
YOL019W	105.958	103.513	284.094	249.635	1.34938	7.0136e-31	1.73538e-29	S000005379	YOL019W
YDR378C	164.917	164.509	68.8109	74.7643	-1.19845	7.2729e-31	1.79331e-29	S000002786	YDR378C	LSM6	Like SM
YLR043C	268.61	289.431	109.153	114.16	-1.32128	7.32063e-31	1.79886e-29	S000004033	YLR043C	TRX1	ThioRedoXin
YGL180W	47.3518	49.9536	111.735	117.554	1.23654	7.8753e-31	1.9285e-29	S000003148	YGL180W	ATG1	AuTophaGy related
YNL122C	172.774	160.227	56.8631	70.4221	-1.38831	9.80154e-31	2.39198e-29	S000005066	YNL122C
YBR150C	73.6819	65.6533	160.854	164.608	1.22331	9.99128e-31	2.42996e-29	S000000354	YBR150C	TBS1	ThiaBendazole Sensitive
YOR263C	24.2775	27.1177	6.49021	5.60535	-2.08275	1.31219e-30	3.1805e-29	S000005789	YOR263C
YOR378W	29.7984	26.3665	73.0148	70.9747	1.35714	1.52318e-30	3.67938e-29	S000005905	YOR378W	AMF1	AMmonium Facilitator
YDR115W	156.636	182.012	66.1559	70.9747	-1.30418	1.58359e-30	3.81239e-29	S000002522	YDR115W	MRX14	Mitochondrial oRganization of gene eXpression (MIOREX)
YDR123C	32.7003	26.066	89.0191	78.159	1.50708	1.62254e-30	3.893e-29	S000002530	YDR123C	INO2	INOsitol requiring
YPL258C	42.6095	45.747	99.0494	109.738	1.24051	2.99304e-30	7.15718e-29	S000006179	YPL258C	THI21	THIamine metabolism
YOR096W	732.997	922.828	277.899	276.004	-1.57976	3.24121e-30	7.72469e-29	S000005622	YOR096W	RPS7A	Ribosomal Protein of the Small subunit
YBL098W	44.8037	42.4418	97.0581	102.554	1.19332	3.83935e-30	9.11973e-29	S000000194	YBL098W	BNA4	Biosynthesis of Nicotinic Acid
YDR234W	105.108	106.367	243.604	243.083	1.20246	4.12944e-30	9.77622e-29	S000002642	YDR234W	LYS4	LYSine requiring
YER117W	744.11	900.518	290.953	287.136	-1.50831	4.74129e-30	1.11876e-28	S000000919	YER117W	RPL23B	Ribosomal Protein of the Large subunit
YDR218C	16.6333	13.2208	51.4791	66.7115	1.98229	5.95432e-30	1.40035e-28	S000002626	YDR218C	SPR28	SPorulation Regulated
YFL050C	62.2864	60.3951	133.861	141.081	1.16379	6.07431e-30	1.42387e-28	S000001844	YFL050C	ALR2	ALuminum Resistance
YHL047C	105.25	96.5269	238.589	232.582	1.22322	6.46027e-30	1.50937e-28	S000001039	YHL047C	ARN2	AFT1 ReguloN
YPR187W	213.543	232.791	96.6156	90.7908	-1.25156	6.97137e-30	1.62346e-28	S000006391	YPR187W	RPO26	RNA POlymerase
YGR034W	442.445	625.96	155.396	154.818	-1.78397	7.96705e-30	1.84929e-28	S000003266	YGR034W	RPL26B	Ribosomal Protein of the Large subunit
YNL034W	7.078	6.68552	27.9521	25.4214	1.95375	1.01221e-29	2.34189e-28	S000004979	YNL034W
YMR230W	489.443	554.448	178.849	204.635	-1.44481	1.55319e-29	3.58189e-28	S000004843	YMR230W	RPS10B	Ribosomal Protein of the Small subunit
YNL096C	232.866	319.027	84.2989	89.9224	-1.66331	1.89722e-29	4.36115e-28	S000005040	YNL096C	RPS7B	Ribosomal Protein of the Small subunit
YCR031C	735.545	948.969	283.652	259.03	-1.63401	1.95782e-29	4.48599e-28	S000000627	YCR031C	RPS14A	Ribosomal Protein of the Small subunit
YBL106C	36.027	32.0755	79.9476	80.8433	1.23831	2.03799e-29	4.65472e-28	S000000202	YBL106C	SRO77	Suppressor of rho3
YJR061W	61.6493	64.3763	137.696	141.555	1.14785	2.17888e-29	4.96061e-28	S000003822	YJR061W		MaNNosyltransferase regulator
YPR098C	251.977	248.491	104.507	109.502	-1.22569	2.28499e-29	5.18563e-28	S000006302	YPR098C
YJL136C	377.965	498.935	144.407	144.16	-1.60333	2.75039e-29	6.22199e-28	S000003672	YJL136C	RPS21B	Ribosomal Protein of the Small subunit
YGR085C	128.607	165.035	55.1668	52.0271	-1.45308	2.87107e-29	6.47445e-28	S000003317	YGR085C	RPL11B	Ribosomal Protein of the Large subunit
YIL155C	808.944	782.582	2461.71	2059.06	1.50615	2.89124e-29	6.49935e-28	S000001417	YIL155C	GUT2	Glycerol UTilization
YDR528W	52.3772	59.3434	19.0281	18.7898	-1.56173	3.85329e-29	8.63477e-28	S000002936	YDR528W	HLR1	Homologue of LRe1
YNL092W	21.7294	20.5824	56.6418	62.5272	1.49263	4.28916e-29	9.58136e-28	S000005036	YNL092W
YCL005W-A	33.4789	39.2117	10.3253	10.0265	-1.83466	5.34588e-29	1.19046e-27	S000028508	YCL005W-A	VMA9	Vacuolar Membrane Atpase
YOR384W	63.4188	50.5546	149.644	141.397	1.35164	5.53318e-29	1.22833e-27	S000005911	YOR384W	FRE5	Ferric REductase
YPR035W	929.765	1000.42	362.714	284.767	-1.57564	6.58893e-29	1.45816e-27	S000006239	YPR035W	GLN1	GLutamiNe metabolism
YLR388W	64.976	84.0573	24.707	23.8425	-1.61687	6.73784e-29	1.4865e-27	S000004380	YLR388W	RPS29A	Ribosomal Protein of the Small subunit
YKL137W	235.06	187.044	72.9411	81.7117	-1.44901	7.14601e-29	1.57168e-27	S000001620	YKL137W	CMC1	Cx9C Mitochondrial protein necessary for full assembly of Cytochrome c oxidase
YHR039C-A	459.433	462.954	181.873	194.529	-1.29315	8.21358e-29	1.80092e-27	S000002100	YHR039C-A	VMA10
YPR020W	387.166	395.122	143.67	165.476	-1.3396	8.62079e-29	1.88441e-27	S000006224	YPR020W	ATP20	ATP synthase
YDL136W	107.302	137.091	44.3252	44.6059	-1.45787	8.84387e-29	1.92726e-27	S000002295	YDL136W	RPL35B	Ribosomal Protein of the Large subunit
YJR151C	48.555	48.902	130.763	110.212	1.30634	1.5243e-28	3.31164e-27	S000003912	YJR151C	DAN4	Delayed ANaerobic
YDL133W	80.6184	79.7756	170.294	190.661	1.16984	1.90118e-28	4.11787e-27	S000002291	YDL133W	SRF1	Spo14 Regulatory Factor
YKR057W	569.496	659.087	239.4	230.846	-1.38538	1.97536e-28	4.26558e-27	S000001765	YKR057W	RPS21A	Ribosomal Protein of the Small subunit
YDR453C	117.919	122.668	50.5941	55.185	-1.18578	1.99158e-28	4.28762e-27	S000002861	YDR453C	TSA2	Thiol-Specific Antioxidant
YNL009W	69.6475	57.841	152.151	153.239	1.25945	2.01825e-28	4.33194e-27	S000004954	YNL009W	IDP3	Isocitrate Dehydrogenase
YPR099C	86.1392	96.9777	35.2536	39.6322	-1.29026	2.09072e-28	4.47401e-27	S000006303	YPR099C
YFR044C	273.918	321.281	118.373	112.739	-1.36449	2.11848e-28	4.51985e-27	S000001940	YFR044C	DUG1	Deficient in Utilization of Glutathione
YPR006C	128.961	116.283	298.107	297.873	1.28078	2.7191e-28	5.77874e-27	S000006210	YPR006C	ICL2	IsoCitrate Lyase
YPR106W	114.168	127.926	52.5117	51.8692	-1.21322	2.72475e-28	5.77874e-27	S000006310	YPR106W	ISR1	Inhibition of Staurosporine Resistance
YML026C	669.72	898.414	252.012	250.898	-1.64058	2.82988e-28	5.9839e-27	S000004488	YML026C	RPS18B	Ribosomal Protein of the Small subunit
YGL030W	1173.11	1455.19	456.38	465.954	-1.51073	2.8909e-28	6.09483e-27	S000002998	YGL030W	RPL30	Ribosomal Protein of the Large subunit
YMR194W	191.035	241.956	74.4161	83.6065	-1.45421	2.90298e-28	6.10225e-27	S000004807	YMR194W	RPL36A	Ribosomal Protein of the Large subunit
YOR189W	106.382	117.635	48.8978	47.7639	-1.21203	2.98016e-28	6.24606e-27	S000005715	YOR189W	IES4	Ino Eighty Subunit
YNL014W	152.46	130.405	359.321	352.189	1.33048	3.28847e-28	6.87203e-27	S000004959	YNL014W	HEF3	Homolog of EF-3
YML001W	216.304	216.04	97.3531	96.9488	-1.15379	3.96855e-28	8.26898e-27	S000004460	YML001W	YPT7	Yeast Protein Two
YCL035C	619.183	649.623	231.73	263.53	-1.3573	4.45906e-28	9.26393e-27	S000000540	YCL035C	GRX1	GlutaRedoXin
YMR225C	136.676	135.739	59.5181	64.5799	-1.13467	4.55915e-28	9.41987e-27	S000004838	YMR225C	MRPL44	Mitochondrial Ribosomal Protein
YML099C	65.2591	69.1088	144.038	150.95	1.13448	4.56056e-28	9.41987e-27	S000004565	YML099C	ARG81	ARGinine requiring
YDL211C	21.5879	24.2632	59.7394	69.4747	1.49461	6.09502e-28	1.25529e-26	S000002370	YDL211C
YGL232W	83.945	87.2123	36.4337	39.3953	-1.17479	6.1656e-28	1.26617e-26	S000003201	YGL232W	TAN1	Trna AcetylatioN
YGL226C-A	69.5059	91.8696	24.117	27.553	-1.64294	6.30582e-28	1.29124e-26	S000003194	YGL226C-A	OST5	OligoSaccharylTransferase
YOR116C	100.578	97.804	217.569	229.661	1.1725	6.62056e-28	1.35181e-26	S000005642	YOR116C	RPO31	RNA POlymerase
YBL036C	142.197	140.696	60.5507	67.0273	-1.14932	7.24691e-28	1.47547e-26	S000000132	YBL036C
YJL094C	143.683	113.654	347.447	347.847	1.43355	7.40838e-28	1.50405e-26	S000003630	YJL094C	KHA1
YHR010W	881.989	979.993	375.104	354.795	-1.35098	7.94248e-28	1.6079e-26	S000001052	YHR010W	RPL27A	Ribosomal Protein of the Large subunit
YLR106C	211.703	175.251	499.967	537.955	1.4232	8.27661e-28	1.6708e-26	S000004096	YLR106C	MDN1	MiDasiN
YER131W	402.455	535.142	158.273	155.923	-1.57713	8.69712e-28	1.75072e-26	S000000933	YER131W	RPS26B	Ribosomal Protein of the Small subunit
YJR078W	92.651	74.6675	237.999	207.793	1.41333	8.91472e-28	1.78947e-26	S000003839	YJR078W	BNA2	Biosynthesis of Nicotinic Acid
YGR185C	165.837	208.378	74.1949	73.58	-1.34005	9.09163e-28	1.81986e-26	S000003417	YGR185C	TYS1	TYrosyl-tRNA Synthetase
YDR418W	127.899	171.42	54.503	49.4218	-1.52526	9.57434e-28	1.91111e-26	S000002826	YDR418W	RPL12B	Ribosomal Protein of the Large subunit
YIL162W	273.281	298.895	698.14	732.721	1.32237	1.12029e-27	2.22994e-26	S000001424	YIL162W	SUC2	SUCrose
YBR114W	65.1883	63.4749	135.778	149.134	1.14644	1.17569e-27	2.33369e-26	S000000318	YBR114W	RAD16	RADiation sensitive
YDR382W	475.146	663.97	167.492	181.424	-1.70691	1.31164e-27	2.59633e-26	S000002790	YDR382W	RPP2B	Ribosomal Protein P2 Beta
YMR191W	425.529	355.685	1049.27	1039.99	1.4191	1.36798e-27	2.70033e-26	S000004803	YMR191W	SPG5	Stationary Phase Gene
YNL212W	150.974	153.617	346.046	371.453	1.23602	1.75058e-27	3.44602e-26	S000005156	YNL212W	VID27	Vacuolar Import and Degradation
YOL154W	13.8729	12.695	39.0887	43.8164	1.63972	2.14291e-27	4.20671e-26	S000005514	YOL154W	ZPS1	Zinc- and pH-regulated Surface protein
YLR262C-A	178.79	150.312	69.7697	69.08	-1.24513	2.19084e-27	4.28898e-26	S000007246	YLR262C-A	TMA7	Translation Machinery Associated
YDR380W	247.801	239.853	652.487	574.193	1.33082	2.56036e-27	4.99866e-26	S000002788	YDR380W	ARO10	AROmatic amino acid requiring
YJL079C	176.525	151.964	549.971	428.059	1.57393	2.64169e-27	5.14335e-26	S000003615	YJL079C	PRY1	Pathogen Related in Yeast
YBL059C-A	383.557	303.928	100.524	125.054	-1.60807	2.82278e-27	5.48097e-26	S000007488	YBL059C-A	CMC2	Cx9C Motif-Containing protein
YOR100C	278.024	241.731	687.224	645.957	1.35885	2.93407e-27	5.68157e-26	S000005626	YOR100C	CRC1	CaRnitine Carrier
YOL077W-A	448.037	349.45	129.583	147.16	-1.52714	3.30669e-27	6.38576e-26	S000007339	YOL077W-A	ATP19	ATP synthase
YLR325C	499.211	612.139	209.162	206.056	-1.42024	3.81133e-27	7.34041e-26	S000004317	YLR325C	RPL38	Ribosomal Protein of the Large subunit
YBL026W	220.48	174.8	68.7372	78.8696	-1.42165	3.98844e-27	7.66082e-26	S000000122	YBL026W	LSM2	Like SM
YLR273C	30.8601	28.0942	75.0799	69.4747	1.29335	4.10483e-27	7.85985e-26	S000004263	YLR273C	PIG1	Protein Interacting with Gsy2p
YHR202W	86.7762	77.1464	179.439	179.766	1.13129	4.11412e-27	7.85985e-26	S000001245	YHR202W
YLR438W	72.9034	70.3858	184.602	154.897	1.24457	4.12558e-27	7.86066e-26	S000004430	YLR438W	CAR2	Catabolism of ARginine
YKL156W	200.378	252.022	81.8651	89.6855	-1.3989	4.53373e-27	8.61529e-26	S000001639	YKL156W	RPS27A	Ribosomal Protein of the Small subunit
YLL045C	273.14	362.821	112.104	102.002	-1.57023	4.66149e-27	8.83452e-26	S000003968	YLL045C	RPL8B	Ribosomal Protein of the Large subunit
YMR190C	52.1648	48.1508	109.596	119.923	1.19325	4.88115e-27	9.22628e-26	S000004802	YMR190C	SGS1	Slow Growth Suppressor
YER057C	179.852	187.12	88.2816	81.9486	-1.10772	5.48817e-27	1.03462e-25	S000000859	YER057C	HMF1	Homologous Mmf1p Factor
YGR032W	546.28	421.338	1447.76	1388.31	1.55128	6.25236e-27	1.17558e-25	S000003264	YGR032W	GSC2	Glucan Synthase of Cerevisiae
YCR089W	30.9308	33.3525	72.4986	77.7643	1.22496	6.33033e-27	1.1871e-25	S000000685	YCR089W	FIG2	Factor-Induced Gene
YKL167C	155.362	163.157	65.1971	75.3169	-1.1811	6.40617e-27	1.19817e-25	S000001650	YKL167C	MRP49	Mitochondrial Ribosomal Protein
YLR308W	1.0617	1.05166	8.40777	8.68434	3.00408	6.88522e-27	1.2844e-25	S000004299	YLR308W	CDA2	Chitin DeAcetylase
YLR081W	7.92735	7.8123	26.1821	27.4741	1.76763	8.57481e-27	1.59541e-25	S000004071	YLR081W	GAL2	GALactose metabolism
YKL122C	108.01	117.936	45.7265	51.4744	-1.21725	9.04867e-27	1.67919e-25	S000001605	YKL122C	SRP21	Signal Recognition Particle
YML082W	45.5115	42.2165	96.5418	94.3435	1.12106	1.25939e-26	2.33101e-25	S000004547	YML082W
YFL014W	7345.97	7212.33	2918.38	2967.04	-1.30662	1.60587e-26	2.96461e-25	S000001880	YFL014W	HSP12	Heat Shock Protein
YKL172W	169.235	174.65	82.8976	80.3696	-1.0744	1.64872e-26	3.03586e-25	S000001655	YKL172W	EBP2	EBNA1-binding protein (homolog)
YDR071C	268.185	277.787	117.93	121.107	-1.19156	1.93459e-26	3.55306e-25	S000002478	YDR071C	PAA1	PolyAmine Acetyltransferase
YGR105W	68.6566	69.7848	27.2884	30.3952	-1.26364	2.45288e-26	4.4794e-25	S000003337	YGR105W	VMA21	Vacuolar Membrane Atpase
YKL003C	170.863	177.955	69.0322	82.6591	-1.20187	2.45599e-26	4.4794e-25	S000001486	YKL003C	MRP17	Mitochondrial Ribosomal Protein
YBR117C	198.538	179.533	533.451	448.822	1.37741	2.45782e-26	4.4794e-25	S000000321	YBR117C	TKL2	TransKetoLase
YPL267W	55.2791	68.2074	15.193	20.2898	-1.8002	2.61913e-26	4.7612e-25	S000006188	YPL267W	ACM1	APC/C[Cdh1] Modulator
YKR103W	16.8456	15.3241	44.5464	51.4744	1.5757	2.72982e-26	4.94979e-25	S000001811	YKR103W	NFT1	New Full-length MRP-type Transporter
YPL021W	0.849359	0.600946	6.85897	8.92118	3.41802	2.97947e-26	5.38876e-25	S000005942	YPL021W	ECM23	ExtraCellular Mutant
YLR372W	146.515	168.415	69.0322	71.1326	-1.16768	4.0363e-26	7.28169e-25	S000004364	YLR372W	ELO3	fatty acid ELOngation
YNL318C	0.42468	0.901419	7.00647	7.10537	3.4071	4.14471e-26	7.45838e-25	S000005262	YNL318C	HXT14	HeXose Transporter
YNL070W	67.878	72.2638	28.6897	31.0268	-1.23086	4.91482e-26	8.82191e-25	S000005014	YNL070W	TOM7	Translocase of the Outer Mitochondrial membrane
YER056C-A	272.857	380.324	103.991	108.633	-1.61901	4.98543e-26	8.92617e-25	S000002135	YER056C-A	RPL34A	Ribosomal Protein of the Large subunit
YML073C	342.787	454.315	141.162	140.923	-1.49845	5.18993e-26	9.26904e-25	S000004538	YML073C	RPL6A	Ribosomal Protein of the Large subunit
YCR003W	104.825	98.9307	39.9	48.0007	-1.21402	5.24168e-26	9.33805e-25	S000000596	YCR003W	MRPL32	Mitochondrial Ribosomal Protein
YLR417W	30.6477	29.5215	70.7285	67.6589	1.2013	5.84236e-26	1.03822e-24	S000004409	YLR417W	VPS36	Vacuolar Protein Sorting
YBR008C	66.6039	77.1464	156.355	167.371	1.17148	6.12889e-26	1.08643e-24	S000000212	YBR008C	FLR1	FLuconazole Resistance
YJL096W	178.861	184.866	84.6677	88.896	-1.06745	6.98126e-26	1.23445e-24	S000003632	YJL096W	MRPL49	Mitochondrial Ribosomal Protein
YKL053C-A	166.262	163.683	74.1949	80.4486	-1.09358	7.99443e-26	1.41011e-24	S000007243	YKL053C-A	MDM35	Mitochondrial Distribution and Morphology
YLR194C	354.608	388.887	889.232	902.934	1.26934	1.01152e-25	1.77978e-24	S000004184	YLR194C		Novel Cell Wall protein
YIL002W-A	62.3571	68.5078	25.002	27.553	-1.31635	1.08613e-25	1.90635e-24	S000028835	YIL002W-A
YER067W	775.678	842	263.886	329.61	-1.44672	1.24447e-25	2.1789e-24	S000000869	YER067W	RGI1	Respiratory Growth Induced
YBL042C	74.7436	72.4891	164.689	150.239	1.09693	1.48595e-25	2.59532e-24	S000000138	YBL042C	FUI1	5-FlUorourIdine resistance
YML024W	686.707	899.09	282.25	276.32	-1.5053	1.79703e-25	3.13096e-24	S000004486	YML024W	RPS17A	Ribosomal Protein of the Small subunit
YOL067C	43.2466	38.0098	91.0104	89.6855	1.15211	1.86152e-25	3.23541e-24	S000005428	YOL067C	RTG1	ReTroGrade regulation
YKR085C	146.868	157.598	72.6461	71.4484	-1.07894	1.87038e-25	3.2429e-24	S000001793	YKR085C	MRPL20	Mitochondrial Ribosomal Protein
YBL063W	34.3283	37.2586	76.4812	83.5275	1.16034	2.28557e-25	3.95315e-24	S000000159	YBL063W	KIP1	KInesin related Protein
YDR077W	6108.66	6536.86	17777.5	15253.3	1.38518	2.33485e-25	4.0286e-24	S000002484	YDR077W	SED1	Suppression of Exponential Defect
YNR007C	133.066	130.18	293.313	302.847	1.17915	2.8148e-25	4.845e-24	S000005290	YNR007C	ATG3	AuTophaGy related
YKL188C	88.6165	86.4611	179.587	191.055	1.08174	3.02646e-25	5.19677e-24	S000001671	YKL188C	PXA2	PeroXisomal ABC-transporter
YFL034C-A	74.319	96.6772	24.707	31.8163	-1.59765	3.22216e-25	5.51873e-24	S000006436	YFL034C-A	RPL22B	Ribosomal Protein of the Large subunit
YHR147C	187.355	188.772	88.2816	90.475	-1.07323	3.22946e-25	5.51873e-24	S000001190	YHR147C	MRPL6	Mitochondrial Ribosomal Protein
YBL075C	934.295	810.225	2404.7	2152.14	1.38517	3.42912e-25	5.84591e-24	S000000171	YBL075C	SSA3	Stress-Seventy subfamily A
YDL191W	351.706	408.869	160.928	156.239	-1.26166	3.70688e-25	6.30435e-24	S000002350	YDL191W	RPL35A	Ribosomal Protein of the Large subunit
YIL046W	190.186	161.129	463.755	417.48	1.32659	4.23074e-25	7.17815e-24	S000001308	YIL046W	MET30	METhionine requiring
YDR034C-D	1.7695	1.72772	10.6203	9.86857	2.54458	4.24214e-25	7.18041e-24	S000007345	YDR034C-D
YLR133W	81.8924	77.522	176.489	161.055	1.08221	5.14467e-25	8.68741e-24	S000004123	YLR133W	CKI1	Choline KInase
YLR307W	11.254	9.31466	34.7374	31.9742	1.69516	5.69514e-25	9.59423e-24	S000004298	YLR307W	CDA1	Chitin DeAcetylase
YIL131C	16.5625	16.0753	46.759	42.948	1.45833	5.72397e-25	9.62006e-24	S000001393	YIL131C	FKH1	ForK head Homolog
YLL024C	499.353	709.792	200.68	177.634	-1.67611	5.82958e-25	9.77449e-24	S000003947	YLL024C	SSA2	Stress-Seventy subfamily A
YEL026W	70.0014	98.5551	25.9608	28.8162	-1.62123	6.73244e-25	1.12369e-23	S000000752	YEL026W	SNU13	Small NUclear ribonucleoprotein associated
YHR018C	321.907	282.369	786.421	714.958	1.31292	6.7333e-25	1.12369e-23	S000001060	YHR018C	ARG4	ARGinine requiring
YPL079W	380.584	510.804	162.181	142.186	-1.54993	6.93253e-25	1.15423e-23	S000006000	YPL079W	RPL21B	Ribosomal Protein of the Large subunit
YGR041W	129.74	141.222	65.0496	63.6325	-1.07385	7.58362e-25	1.25966e-23	S000003273	YGR041W	BUD9	BUD site selection
YLR107W	76.23	74.0666	151.414	162.239	1.06098	7.60108e-25	1.25966e-23	S000004097	YLR107W	REX3	Rna EXonuclease
YHL015W	891.474	1236.9	338.376	359.453	-1.60876	8.05228e-25	1.33134e-23	S000001007	YHL015W	RPS20	Ribosomal Protein of the Small subunit
YHR063W-A	15.0761	14.4978	3.68762	2.84215	-2.17179	8.72953e-25	1.43997e-23	S000028778	YHR063W-A
YHR060W	115.654	117.41	55.9043	55.4219	-1.06571	9.13617e-25	1.50356e-23	S000001102	YHR060W	VMA22	Vacuolar Membrane Atpase
YAL063C	83.8742	70.9867	173.392	167.845	1.13922	9.17392e-25	1.5063e-23	S000000059	YAL063C	FLO9	FLOcculation
YKL161C	134.482	160.302	62.4682	66.3957	-1.19365	1.038e-24	1.70041e-23	S000001644	YKL161C	KDX1	Kinase Dead X-talker
YBL101C	79.4151	74.8178	158.863	159.555	1.04548	1.22449e-24	2.0013e-23	S000000197	YBL101C	ECM21	ExtraCellular Mutant
YDR450W	646.858	809.399	283.357	265.741	-1.407	1.40358e-24	2.28877e-23	S000002858	YDR450W	RPS18A	Ribosomal Protein of the Small subunit
YNL058C	40.84	35.0802	85.9952	83.0539	1.15389	1.45207e-24	2.36243e-23	S000005003	YNL058C
YLR214W	52.3064	42.9676	107.973	117.318	1.2404	1.45959e-24	2.36926e-23	S000004204	YLR214W	FRE1	Ferric REductase
YKL015W	61.8617	61.4467	124.273	129.712	1.04219	1.65833e-24	2.68575e-23	S000001498	YKL015W	PUT3	Proline UTilization
YIL148W	766.051	892.405	333.803	339.873	-1.29966	1.71606e-24	2.77294e-23	S000001410	YIL148W	RPL40A	Ribosomal Protein of the Large subunit
YIL133C	391.979	501.414	170.147	169.502	-1.3951	1.96911e-24	3.17463e-23	S000001395	YIL133C	RPL16A	Ribosomal Protein of the Large subunit
YJL130C	483.427	471.292	214.693	210.477	-1.16699	2.01907e-24	3.24783e-23	S000003666	YJL130C	URA2	URAcil requiring
YGL126W	49.8291	49.6532	129.288	106.028	1.24239	2.18831e-24	3.51214e-23	S000003094	YGL126W	SCS3	Suppressor of Choline Sensitivity
YBR088C	28.0289	42.9676	5.97394	7.34221	-2.41394	2.74153e-24	4.39014e-23	S000000292	YBR088C	POL30	POLymerase
YFL033C	80.3352	77.522	158.42	166.818	1.04253	2.94274e-24	4.70179e-23	S000001861	YFL033C	RIM15	Regulator of IME2
YCL014W	50.82	39.5873	107.531	106.738	1.24364	3.22827e-24	5.14646e-23	S000000520	YCL014W	BUD3	BUD site selection
YBR137W	118.769	116.208	54.4292	57.9482	-1.06447	3.46135e-24	5.50572e-23	S000000341	YBR137W
YHR072W-A	61.9325	62.0477	27.3621	24.474	-1.25679	3.80235e-24	6.03464e-23	S000007455	YHR072W-A	NOP10	NucleOlar Protein
YDR114C	67.3825	76.4704	31.0497	30.711	-1.21905	4.81748e-24	7.62541e-23	S000002521	YDR114C
YPR063C	163.997	166.763	83.5614	79.8959	-1.01655	4.82607e-24	7.62541e-23	S000006267	YPR063C
YNL185C	76.6547	83.3813	38.0562	36.2374	-1.10619	4.92666e-24	7.75909e-23	S000005129	YNL185C	MRPL19	Mitochondrial Ribosomal Protein
YHR096C	586.058	370.558	1948.17	1691	1.92749	4.93246e-24	7.75909e-23	S000001138	YHR096C	HXT5	HeXose Transporter
YDR274C	69.2228	55.888	23.3795	20.8424	-1.49971	5.06817e-24	7.95502e-23	S000002682	YDR274C
YAL012W	140.074	188.697	63.2795	62.1325	-1.38988	5.08279e-24	7.96043e-23	S000000010	YAL012W	CYS3	CYStathionine gamma-lyase
YLR351C	138.587	160.903	70.1385	65.1325	-1.14596	5.39938e-24	8.43771e-23	S000004343	YLR351C	NIT3	NITrilase superfamily
YGR037C	193.017	224.754	83.7827	95.9225	-1.21722	5.43257e-24	8.47101e-23	S000003269	YGR037C	ACB1	Acyl-CoA-Binding
YOR324C	45.9362	43.193	91.2317	93.4751	1.05063	5.52894e-24	8.60245e-23	S000005851	YOR324C	FRT1	Functionally Related to TCP1
YKL221W	105.462	81.5033	226.788	243.556	1.33028	5.7401e-24	8.91154e-23	S000001704	YKL221W	MCH2	MonoCarboxylate transporter Homologue
YHR211W	50.4661	47.7752	101.704	99.3962	1.03315	5.90858e-24	9.15316e-23	S000001254	YHR211W	FLO5	FLOcculation
YHR191C	52.0233	53.1086	20.2819	21.474	-1.33222	6.0098e-24	9.28976e-23	S000001234	YHR191C	CTF8	Chromosome Transmission Fidelity
YLR237W	94.562	82.4047	217.422	189.003	1.19927	6.26363e-24	9.66118e-23	S000004227	YLR237W	THI7	THIamine metabolism
YIL153W	77.5748	74.8178	184.086	154.344	1.15118	7.25331e-24	1.11635e-22	S000001415	YIL153W	RRD1	Resistant to Rapamycin Deletion
YKL192C	406.277	419.235	179.513	190.74	-1.15682	8.67602e-24	1.33244e-22	S000001675	YKL192C	ACP1	Acyl Carrier Protein
YBL082C	24.2067	22.235	61.8045	55.4219	1.33531	9.72704e-24	1.49064e-22	S000000178	YBL082C	ALG3	Asparagine Linked Glycosylation
YDR248C	97.7471	108.696	47.054	50.3692	-1.08339	1.11184e-23	1.70021e-22	S000002656	YDR248C
YOR115C	105.745	103.137	43.8826	52.185	-1.12153	1.24591e-23	1.90115e-22	S000005641	YOR115C	TRS33	TRapp Subunit
YJL177W	360.765	476.851	160.264	148.897	-1.43768	1.30986e-23	1.99446e-22	S000003713	YJL177W	RPL17B	Ribosomal Protein of the Large subunit
YBR038W	51.1739	40.7892	121.47	105.633	1.30345	1.40715e-23	2.13803e-22	S000000242	YBR038W	CHS2	CHitin Synthase
YML089C	4.31758	4.50709	23.1582	17.2897	2.19614	1.41142e-23	2.13996e-22	S000004554	YML089C
YHR216W	24.2775	28.4698	62.1732	66.6326	1.28853	1.47437e-23	2.23064e-22	S000001259	YHR216W	IMD2	IMP Dehydrogenase
YNL332W	6.0163	4.58221	19.9869	19.5792	1.89524	1.90459e-23	2.87544e-22	S000005276	YNL332W	THI12	THIamine metabolism
YBL052C	39.1413	39.7376	79.8	90.0013	1.10556	1.94447e-23	2.92946e-22	S000000148	YBL052C	SAS3	Something About Silencing
YAL067C	23.5697	20.5073	55.1668	56.4482	1.33893	2.04098e-23	3.06837e-22	S000000062	YAL067C	SEO1	Suppressor of sulfoxyde EthiOnine resistance
YOL109W	4487.59	4072.54	1491.79	1798.92	-1.37926	2.47339e-23	3.7106e-22	S000005469	YOL109W	ZEO1	ZEOcin resistance
YNL110C	66.1085	71.7379	29.0584	31.8163	-1.17934	2.53944e-23	3.8017e-22	S000005054	YNL110C	NOP15	NucleOlar Protein
YDR303C	66.8871	77.7474	29.7222	31.5794	-1.23813	2.77561e-23	4.14654e-22	S000002711	YDR303C	RSC3	Remodel the Structure of Chromatin
YJL127C-B	89.8198	68.7332	30.3122	30.9478	-1.37244	3.49527e-23	5.21073e-22	S000028522	YJL127C-B
YKL067W	945.549	916.142	392.141	423.006	-1.19152	3.67988e-23	5.4745e-22	S000001550	YKL067W	YNK1	Yeast Nucleoside diphosphate Kinase
YJL105W	17.8365	17.127	44.1777	45.6323	1.36003	3.70311e-23	5.49757e-22	S000003641	YJL105W	SET4	SET domain-containing
YKR061W	50.82	50.179	102.811	118.896	1.13369	3.74774e-23	5.55226e-22	S000001769	YKR061W	KTR2	Kre Two Related
YOL157C	12.5988	10.4414	33.6311	39.3164	1.65957	4.03519e-23	5.96573e-22	S000005517	YOL157C	IMA2	IsoMAltase
YGL245W	346.397	411.122	166.017	149.371	-1.26385	4.3767e-23	6.45325e-22	S000003214	YGL245W	GUS1	GlUtamyl-tRNA Synthetase
YFL053W	12.0326	13.8218	36.5812	36.0795	1.4915	4.38307e-23	6.45325e-22	S000001841	YFL053W	DAK2	DihydroxyAcetone Kinase
YCL007C	51.3155	58.5171	14.308	19.974	-1.68133	4.39881e-23	6.46307e-22	S000000513	YCL007C
YIL016W	49.1213	55.4373	20.7982	18.7898	-1.39944	5.96475e-23	8.74585e-22	S000001278	YIL016W	SNL1	Suppressor of Nup116-C Lethal
YDR002W	364.021	413.301	164.468	176.134	-1.19041	6.34366e-23	9.28232e-22	S000002409	YDR002W	YRB1	Yeast Ran Binder
YHR102W	88.121	88.6395	182.611	170.924	1.00015	6.75343e-23	9.86167e-22	S000001144	YHR102W	KIC1	Kinase that Interacts with Cdc31p
YLR301W	62.711	63.2496	28.3209	27.8688	-1.16415	7.01956e-23	1.02293e-21	S000004292	YLR301W	HRI1	HRr25 Interacting
YMR101C	9.76763	8.86395	27.7309	28.0267	1.57931	7.31152e-23	1.0633e-21	S000004707	YMR101C	SRT1	Suppressor of Rer-Two
YGR027C	606.867	715.276	282.84	269.057	-1.26028	7.40102e-23	1.07413e-21	S000003259	YGR027C	RPS25A	Ribosomal Protein of the Small subunit
YBR092C	39.9907	38.6108	104.286	82.6591	1.25026	8.21868e-23	1.19037e-21	S000000296	YBR092C	PHO3	PHOsphate metabolism
YBR214W	344.911	348.474	859.805	756.801	1.22127	8.41125e-23	1.21579e-21	S000000418	YBR214W	SDS24	homolog of S. pombe SDS23
YGL229C	50.6784	59.0429	20.7982	21.2372	-1.38343	9.24642e-23	1.33381e-21	S000003198	YGL229C	SAP4	Sit4 Associated Protein
YBR111W-A	139.507	116.809	45.0627	57.2377	-1.32618	9.68053e-23	1.39361e-21	S000028510	YBR111W-A	SUS1	Sl gene Upstream of ySa1
YIL072W	32.9127	31.1741	67.8522	74.6853	1.15222	1.11079e-22	1.59587e-21	S000001334	YIL072W	HOP1	HOmolog Pairing
YLR197W	159.609	202.894	75.8912	79.1854	-1.22476	1.13403e-22	1.62598e-21	S000004187	YLR197W	NOP56	NucleOlar Protein of 56.8 kDa
YLL014W	158.83	139.645	59.3706	71.6853	-1.18825	1.13691e-22	1.62683e-21	S000003937	YLL014W	EMC6	ER Membrane protein Complex
YER053C	803.99	838.32	375.547	345.716	-1.18703	1.16999e-22	1.67082e-21	S000000855	YER053C	PIC2	PI Carrier
YGR110W	105.321	100.358	217.938	206.687	1.04569	1.1859e-22	1.69015e-21	S000003342	YGR110W	CLD1	CardioLipin-specific Deacylase
YGL068W	47.8472	46.9489	19.6919	17.3687	-1.35338	1.56064e-22	2.21978e-21	S000003036	YGL068W	MNP1	Mitochondrial-Nucleoid Protein
YLR136C	7.85657	8.86395	25.5183	30.632	1.74679	1.62981e-22	2.31355e-21	S000004126	YLR136C	TIS11	similar to the mammalian TPA Induced Sequence gene family
YNL077W	162.935	145.204	336.163	339.4	1.13227	1.85553e-22	2.62872e-21	S000005021	YNL077W	APJ1	Anti-Prion DnaJ
YJL213W	29.8691	28.7703	63.132	68.0536	1.16079	1.98846e-22	2.81146e-21	S000003749	YJL213W
YIL027C	83.7327	72.414	32.5985	36.7111	-1.17285	2.26507e-22	3.19621e-21	S000001289	YIL027C	EMC5	ER Membrane protein Complex
YPR028W	525.47	499.386	231.73	237.319	-1.12763	2.32268e-22	3.27104e-21	S000006232	YPR028W	YOP1	YIP One Partner
YEL051W	232.937	255.102	111.44	117.318	-1.09315	2.34335e-22	3.29363e-21	S000000777	YEL051W	VMA8	Vacuolar Membrane Atpase
YOL155C	1451.27	1301.57	3851.35	3189.13	1.35474	2.38348e-22	3.34344e-21	S000005515	YOL155C	HPF1	Haze Protective Factor
YDR363W-A	206.04	191.476	85.6265	99.0804	-1.10626	2.42172e-22	3.39041e-21	S000007235	YDR363W-A	SEM1	Suppressor of Exocyst Mutations
YJL219W	5.94552	5.03292	18.5118	20.4477	1.82267	2.46975e-22	3.45087e-21	S000003755	YJL219W	HXT9	HeXose Transporter
YGR118W	653.653	754.638	309.391	292.11	-1.22719	2.4937e-22	3.47751e-21	S000003350	YGR118W	RPS23A	Ribosomal Protein of the Small subunit
YPR133W-A	41.1232	48.6015	15.0455	16.7371	-1.4971	2.74579e-22	3.82159e-21	S000006433	YPR133W-A	TOM5	Translocase of the Outer Mitochondrial membrane
YOL127W	940.029	1239.68	399.369	416.375	-1.4179	2.83191e-22	3.93376e-21	S000005487	YOL127W	RPL25	Ribosomal Protein of the Large subunit
YOR237W	13.7313	10.3663	37.835	48.7902	1.84246	2.87602e-22	3.98726e-21	S000005763	YOR237W	HES1	Homologous to kES1
YBR126W-B	67.0994	84.9587	27.8046	31.5005	-1.35833	2.8979e-22	4.0098e-21	S000028738	YBR126W-B
YNL046W	161.024	165.035	84.0039	73.8169	-1.04619	3.01927e-22	4.16964e-21	S000004991	YNL046W
YAL007C	84.2281	82.0291	41.7438	41.1322	-1.00422	3.16379e-22	4.36077e-21	S000000005	YAL007C	ERP2	Emp24p/Erv25p Related Protein
YDR277C	131.509	110.724	282.398	270.399	1.19003	3.21991e-22	4.42955e-21	S000002685	YDR277C	MTH1	MSN Three Homolog
YNL202W	47.2102	38.6859	100.967	91.8961	1.16604	3.41006e-22	4.6821e-21	S000005146	YNL202W	SPS19	SPorulation-Specific
YPR132W	640.771	737.811	302.532	293.294	-1.21013	3.75371e-22	5.14402e-21	S000006336	YPR132W	RPS23B	Ribosomal Protein of the Small subunit
YJL163C	132.217	105.616	311.161	276.557	1.30486	3.84867e-22	5.26404e-21	S000003699	YJL163C
YOR255W	2.54808	2.55402	11.0629	14.1318	2.2978	4.36866e-22	5.9638e-21	S000005781	YOR255W	OSW1	Outer Spore Wall
YIR014W	20.3846	17.3523	49.6353	47.606	1.3641	4.56497e-22	6.21988e-21	S000001453	YIR014W
YER047C	82.8125	69.1088	167.934	159.002	1.10512	4.72507e-22	6.42574e-21	S000000849	YER047C	SAP1	Sin1 Associated Protein
YDR381C-A	408.967	359.666	157.904	177.397	-1.19704	4.78738e-22	6.49808e-21	S000007650	YDR381C-A
YOR232W	283.969	293.262	124.568	139.502	-1.12839	5.28281e-22	7.1569e-21	S000005758	YOR232W	MGE1	Mitochondrial GrpE
YHL034W-A	19.606	19.9815	5.08891	6.31588	-1.79681	5.51392e-22	7.45582e-21	S000028774	YHL034W-A
YMR006C	117.99	99.4566	282.472	238.03	1.25903	5.93533e-22	8.01044e-21	S000004608	YMR006C	PLB2	PhosphoLipase B
YLR312W-A	171.004	177.73	84.9627	91.5013	-0.982908	6.42486e-22	8.65473e-21	S000004304	YLR312W-A	MRPL15	Mitochondrial Ribosomal Protein
YML056C	102.277	148.959	36.5074	45.0796	-1.62274	6.67758e-22	8.97819e-21	S000004520	YML056C	IMD4	IMP Dehydrogenase
YNR032C-A	67.9488	62.6486	27.8046	30.1583	-1.17264	6.96935e-22	9.35284e-21	S000007251	YNR032C-A	HUB1	Homologous to UBiquitin
YBR046C	332.1	280.792	790.404	698.852	1.2808	7.37083e-22	9.87303e-21	S000000250	YBR046C	ZTA1	ZeTA-crystallin
YNL168C	127.475	129.429	65.8609	65.1325	-0.97153	7.62863e-22	1.01992e-20	S000005112	YNL168C	FMP41	Found in Mitochondrial Proteome
YJL019W	34.9653	35.3807	72.5723	71.8432	1.03763	7.84971e-22	1.04751e-20	S000003556	YJL019W	MPS3	MonoPolar Spindle
YHR063C	94.6328	107.494	50.1516	44.8428	-1.08819	8.47858e-22	1.12931e-20	S000001105	YHR063C	PAN5	PANtothenate biosynthesis
YOL090W	105.816	131.757	48.6766	53.1324	-1.22236	8.67563e-22	1.15315e-20	S000005450	YOL090W	MSH2	MutS Homolog
YGR014W	110.841	118.086	255.847	231.24	1.0895	8.68991e-22	1.15315e-20	S000003246	YGR014W	MSB2	Multicopy Suppression of a Budding defect
YER066C-A	1171.13	1293.84	393.911	521.139	-1.42972	9.17971e-22	1.21589e-20	S000002959	YER066C-A
YPL088W	149.7	159.626	78.1775	78.3959	-0.98208	9.85917e-22	1.30346e-20	S000006009	YPL088W
YMR123W	52.0233	58.2166	22.642	22.5793	-1.28478	9.88589e-22	1.30457e-20	S000004730	YMR123W	PKR1	Pichia farinosa Killer toxin Resistance
YJR058C	83.4496	82.9305	42.9976	39.869	-1.0049	1.07155e-21	1.41143e-20	S000003819	YJR058C	APS2	clathrin Associated Protein complex Small subunit
YLR353W	22.9327	18.9298	55.7568	52.0271	1.36296	1.08944e-21	1.43236e-20	S000004345	YLR353W	BUD8	BUD site selection
YLR264C-A	32.1341	43.6437	10.6941	10.9738	-1.80468	1.1158e-21	1.46431e-20	S000028808	YLR264C-A
YFR026C	11.5371	13.8969	34.8111	39.7111	1.55118	1.16568e-21	1.52695e-20	S000001922	YFR026C	ULI1	Upr-L-Inducible gene
YAL030W	163.643	177.73	81.2751	88.1855	-1.01049	1.22593e-21	1.60293e-20	S000000028	YAL030W	SNC1	Suppressor of the Null allele of CAP
YOL051W	166.899	157.072	389.781	334.9	1.16146	1.87027e-21	2.44095e-20	S000005411	YOL051W	GAL11	GALactose metabolism
YDR410C	37.7965	40.038	15.193	15.0792	-1.36152	2.01765e-21	2.62848e-20	S000002818	YDR410C	STE14	STErile
YEL017C-A	103.976	100.208	49.1928	52.8955	-1.0005	2.16484e-21	2.81508e-20	S000002103	YEL017C-A	PMP2	Plasma Membrane Proteolipid
YGL041W-A	99.3751	96.3016	44.0302	51.0797	-1.04169	2.17918e-21	2.82857e-20	S000028826	YGL041W-A
YEL021W	283.757	311.59	138.581	137.291	-1.10958	2.20144e-21	2.85226e-20	S000000747	YEL021W	URA3	URAcil requiring
YMR136W	386.812	316.999	851.397	832.275	1.25823	2.27185e-21	2.93816e-20	S000004744	YMR136W	GAT2
YLR171W	30.1523	28.8454	8.33402	10.737	-1.63144	2.28369e-21	2.94811e-20	S000004161	YLR171W
YOR293W	660.589	801.812	315.513	293.767	-1.26303	2.47702e-21	3.19191e-20	S000005819	YOR293W	RPS10A	Ribosomal Protein of the Small subunit
YIL047C	155.999	123.269	373.556	321.715	1.31567	2.50252e-21	3.21895e-20	S000001309	YIL047C	SYG1	Suppressor of Yeast Gpa1
YBR071W	176.667	192.152	385.651	414.085	1.11663	2.51324e-21	3.22319e-20	S000000275	YBR071W
YNR022C	228.195	222.35	105.466	116.133	-1.02397	2.51487e-21	3.22319e-20	S000005305	YNR022C	MRPL50	Mitochondrial Ribosomal Protein
YIL013C	72.1956	57.5406	140.867	144.871	1.13818	2.54501e-21	3.25596e-20	S000001275	YIL013C	PDR11	Pleiotropic Drug Resistance
YBR021W	45.2992	40.639	87.9866	87.5539	1.02965	2.59997e-21	3.32032e-20	S000000225	YBR021W	FUR4	5-FlUoRouridine sensitivity
YDL072C	524.338	502.541	232.467	245.293	-1.10396	2.61082e-21	3.32821e-20	S000002230	YDL072C	YET3	Yeast Endoplasmic reticulum Transmembrane protein
YHL001W	177.728	215.589	90.1254	89.7645	-1.12825	2.76454e-21	3.51787e-20	S000000993	YHL001W	RPL14B	Ribosomal Protein of the Large subunit
YIL059C	56.8363	50.6297	20.2819	22.6582	-1.32445	2.78871e-21	3.54231e-20	S000001321	YIL059C
YJL097W	88.8288	86.2357	43.1451	45.0796	-0.988916	2.91702e-21	3.6987e-20	S000003633	YJL097W	PHS1	PTPLA Homolog involved in Sphingolipid biosynthesis 1
YJL200C	59.2428	59.0429	118.373	114.16	0.975147	2.94572e-21	3.72845e-20	S000003736	YJL200C	ACO2	ACOnitase
YCR073C	157.981	166.086	78.1037	85.6592	-0.984896	3.06081e-21	3.86725e-20	S000000669	YCR073C	SSK22	Suppressor of Sensor Kinase
YOR169C	9.34295	10.4414	1.77006	2.13161	-2.33928	3.07297e-21	3.87574e-20	S000005695	YOR169C
YPR060C	35.1069	49.1273	7.37524	11.3686	-2.1694	3.12634e-21	3.93609e-20	S000006264	YPR060C	ARO7	AROmatic amino acid requiring
YDR471W	410.948	515.461	197.73	170.055	-1.3325	3.19577e-21	4.01642e-20	S000002879	YDR471W	RPL27B	Ribosomal Protein of the Large subunit
YOR253W	76.1592	70.6863	33.2623	36.5532	-1.0735	3.34135e-21	4.19199e-20	S000005779	YOR253W	NAT5	N-terminal AcetylTransferase
YDR402C	6.86566	5.18316	20.2819	23.9214	1.8696	3.41807e-21	4.2807e-20	S000002810	YDR402C	DIT2	DITyrosine
YMR244C-A	44.0251	42.4418	16.4468	18.0792	-1.32511	3.74383e-21	4.68045e-20	S000004857	YMR244C-A	COA6	Cytochrome Oxidase Assembly
YML066C	13.6605	14.3476	35.4749	37.1058	1.37335	4.09196e-21	5.10671e-20	S000004531	YML066C	SMA2	Spore Membrane Assembly
YBR164C	70.0722	78.5737	33.5573	36.4742	-1.08582	4.10677e-21	5.11623e-20	S000000368	YBR164C	ARL1	ADP-Ribosylation factor-Like
YLR303W	419.513	526.278	184.823	203.056	-1.28589	4.4053e-21	5.47856e-20	S000004294	YLR303W	MET17	METhionine requiring
YJL216C	13.5898	12.8452	33.9998	35.4479	1.39205	4.77834e-21	5.93214e-20	S000003752	YJL216C	IMA5	IsoMAltase
YPL059W	181.692	184.19	83.0451	95.5277	-1.03526	4.86992e-21	6.03531e-20	S000005980	YPL059W	GRX5	GlutaRedoXin
YLR142W	564.329	483.912	1255.34	1176.1	1.21378	5.28446e-21	6.53768e-20	S000004132	YLR142W	PUT1	Proline UTilization
YEL060C	1052.5	1058.34	2491.06	2264.48	1.1718	5.32876e-21	6.58106e-20	S000000786	YEL060C	PRB1	PRoteinase B
YKL105C	95.9068	79.3249	185.34	187.74	1.0896	5.38627e-21	6.64058e-20	S000001588	YKL105C	SEG2	Stability of Eisosomes Guaranteed
YBR282W	89.3243	93.0715	45.8002	47.0533	-0.973948	5.55988e-21	6.84278e-20	S000000486	YBR282W	MRPL27	Mitochondrial Ribosomal Protein
YPL027W	6.51176	6.986	20.3556	23.3688	1.69421	5.74707e-21	7.06096e-20	S000005948	YPL027W	SMA1	Spore Membrane Assembly
YNR019W	134.977	126.274	268.606	279.715	1.06936	5.86037e-21	7.18778e-20	S000005302	YNR019W	ARE2	Acyl-coenzyme A: cholesterol acyl transferase-Related Enzyme
YPL130W	0.63702	1.35213	6.93272	7.10537	2.82049	6.19525e-21	7.58546e-20	S000006051	YPL130W	SPO19	SPOrulation
YPR166C	155.999	132.809	58.8544	70.501	-1.15959	6.51128e-21	7.95873e-20	S000006370	YPR166C	MRP2	Mitochondrial Ribosomal Protein
YHL035C	65.0468	67.0806	124.936	140.923	1.00844	6.67716e-21	8.1475e-20	S000001027	YHL035C	VMR1	Vacuolar Multidrug Resistance
YOR071C	48.8382	47.9254	99.3444	91.6592	0.981139	7.00643e-21	8.53467e-20	S000005597	YOR071C	NRT1	Nicotinamide Riboside Transporter
YML063W	833.08	1061.65	384.914	381.637	-1.30547	7.1135e-21	8.6503e-20	S000004528	YML063W	RPS1B	Ribosomal Protein of the Small subunit
YBR031W	134.977	177.955	68.0734	61.2641	-1.27393	7.21415e-21	8.75775e-20	S000000235	YBR031W	RPL4A	Ribosomal Protein of the Large subunit
YBR082C	338.541	394.221	165.722	168.002	-1.13457	7.65059e-21	9.27179e-20	S000000286	YBR082C	UBC4	UBiquitin-Conjugating
YDL181W	340.168	336.755	161.296	166.976	-1.04413	8.11503e-21	9.81795e-20	S000002340	YDL181W	INH1	INHibitor (of F1F0-ATPase)
YDR174W	329.41	364.399	162.476	165.555	-1.08062	8.14373e-21	9.83597e-20	S000002581	YDR174W	HMO1	High MObility group (HMG) family
YLR381W	37.2303	37.484	77.3662	72.6326	1.00567	8.54051e-21	1.02977e-19	S000004373	YLR381W	CTF3	Chromosome Transmission Fidelity
YER102W	161.803	217.017	79.21	78.6327	-1.26261	8.67354e-21	1.04405e-19	S000000904	YER102W	RPS8B	Ribosomal Protein of the Small subunit
YPL273W	118.769	134.612	62.9108	62.4483	-1.0148	8.90418e-21	1.07e-19	S000006194	YPL273W	SAM4	S-AdenosylMethionine metabolism
YFL041W	129.952	108.321	271.409	258.241	1.15209	8.92649e-21	1.07088e-19	S000001853	YFL041W	FET5	FErrous Transport
YLR287C-A	602.833	690.412	225.461	287.215	-1.33499	1.11994e-20	1.34129e-19	S000004278	YLR287C-A	RPS30A	Ribosomal Protein of the Small subunit
YIR032C	41.7602	40.4887	17.0368	14.0528	-1.40129	1.19602e-20	1.43001e-19	S000001471	YIR032C	DAL3	Degradation of Allantoin
YHR209W	270.875	316.098	124.346	137.134	-1.16661	1.27844e-20	1.52599e-19	S000001252	YHR209W	CRG1	Cantharidin Resistance Gene
YGL135W	125.21	170.594	60.4032	60.1588	-1.29435	1.28594e-20	1.53237e-19	S000003103	YGL135W	RPL1B	Ribosomal Protein of the Large subunit
YLR057W	52.8726	51.2306	99.9344	99.633	0.938569	1.31362e-20	1.56274e-19	S000004047	YLR057W	MNL2	MaNnosidase-Like protein
YGL189C	680.974	904.048	306.367	311.215	-1.35973	1.35501e-20	1.6093e-19	S000003157	YGL189C	RPS26A	Ribosomal Protein of the Small subunit
YER145C-A	35.4608	37.7845	13.3492	14.7634	-1.38172	1.36728e-20	1.62117e-19	S000028758	YER145C-A
YDL061C	113.814	143.551	58.4119	48.6323	-1.26443	1.3752e-20	1.62785e-19	S000002219	YDL061C	RPS29B	Ribosomal Protein of the Small subunit
YPR109W	155.433	143.326	71.3923	78.3959	-0.996535	1.57072e-20	1.85621e-19	S000006313	YPR109W
YPR102C	153.876	216.941	72.1298	73.1853	-1.35115	1.64638e-20	1.9424e-19	S000006306	YPR102C	RPL11A	Ribosomal Protein of the Large subunit
YBR175W	19.5353	20.0566	6.63771	5.84219	-1.66206	1.68661e-20	1.98658e-19	S000000379	YBR175W	SWD3	Set1c
YER075C	46.2901	45.3714	87.249	90.9487	0.958642	1.73298e-20	2.03783e-19	S000000877	YER075C	PTP3	Protein Tyrosine Phosphatase
YGL139W	68.9397	61.8223	139.982	125.686	1.02242	1.73765e-20	2.03995e-19	S000003107	YGL139W	FLC3	FLavin Carrier
YBL092W	783.534	1060.07	359.321	341.768	-1.39476	1.77132e-20	2.07606e-19	S000000188	YBL092W	RPL32	Ribosomal Protein of the Large subunit
YGL178W	36.8764	36.8831	71.3923	75.9485	0.99777	1.78555e-20	2.0893e-19	S000003146	YGL178W	MPT5	Multicopy suppressor of Pop Two
YPL265W	867.408	648.346	2140	1917.58	1.42053	2.03322e-20	2.37243e-19	S000006186	YPL265W	DIP5	DIcarboxylic amino acid Permease
YJR155W	171.854	145.204	350.619	342.716	1.12855	2.03418e-20	2.37243e-19	S000003916	YJR155W	AAD10	Aryl-Alcohol Dehydrogenase
YNR056C	15.9963	18.7044	42.8501	44.9217	1.33935	2.05801e-20	2.3963e-19	S000005339	YNR056C	BIO5	BIOtin
YBR105C	74.1066	69.4844	137.032	139.423	0.944671	2.13106e-20	2.47732e-19	S000000309	YBR105C	VID24	Vacuolar Import and Degradation
YDR424C	139.72	114.105	52.8067	60.0798	-1.1697	2.19348e-20	2.54572e-19	S000002832	YDR424C	DYN2	DYNein
YOR389W	48.6258	45.4465	91.8954	91.3435	0.961366	2.44559e-20	2.83371e-19	S000005916	YOR389W
YGR258C	110.488	98.9307	206.58	221.845	1.03221	2.75076e-20	3.18213e-19	S000003490	YGR258C	RAD2	RADiation sensitivity
YGL021W	53.7928	41.9911	106.646	103.265	1.13079	3.08844e-20	3.56697e-19	S000002989	YGL021W	ALK1
YLR183C	70.0722	90.3672	31.566	35.0531	-1.2678	3.1069e-20	3.58249e-19	S000004173	YLR183C	TOS4	Target Of Sbf
YPL222W	242.846	204.397	533.746	485.77	1.18861	3.23498e-20	3.72414e-19	S000006143	YPL222W	FMP40	Found in Mitochondrial Proteome
YLR258W	1556.88	1519.34	731.845	689.536	-1.11383	3.52512e-20	4.05162e-19	S000004248	YLR258W	GSY2	Glycogen SYnthase
YOR343W-B	2.05262	2.10331	9.66156	9.47382	2.19858	3.91194e-20	4.48897e-19	S000007356	YOR343W-B
YOR224C	97.6763	122.217	51.0366	42.7901	-1.2274	4.07839e-20	4.67245e-19	S000005750	YOR224C	RPB8	RNA Polymerase B
YOR045W	87.6256	85.1841	44.6939	44.0533	-0.961262	4.73219e-20	5.41278e-19	S000005571	YOR045W	TOM6	Translocase of the Outer Mitochondrial membrane
YBL095W	40.5569	39.5873	81.2751	76.5011	0.977168	4.91905e-20	5.61749e-19	S000000191	YBL095W	MRX3	Mitochondrial oRganization of gene eXpression (MIOREX)
YKR075C	107.09	77.1464	234.09	223.03	1.31041	5.02242e-20	5.72637e-19	S000001783	YKR075C
YBR045C	34.0452	35.9816	69.3272	73.1063	1.02424	5.23294e-20	5.95685e-19	S000000249	YBR045C	GIP1	Glc7-Interacting Protein
YML124C	81.1846	95.8509	189.175	174.555	1.03935	5.46344e-20	6.20932e-19	S000004593	YML124C	TUB3	TUBulin
YLR344W	320.138	443.573	147.136	148.581	-1.36864	5.72725e-20	6.49878e-19	S000004336	YLR344W	RPL26A	Ribosomal Protein of the Large subunit
YDL010W	74.0358	59.9444	138.212	144.95	1.07869	6.00918e-20	6.80786e-19	S000002168	YDL010W	GRX6	GlutaRedoXin
YGR008C	2086.03	1725.09	760.092	839.46	-1.25258	6.56689e-20	7.42788e-19	S000003240	YGR008C	STF2	STabilizing Factor
YBL028C	44.0251	45.5217	16.668	19.5003	-1.3088	6.80254e-20	7.68223e-19	S000000124	YBL028C
YDR510W	184.665	199.439	92.1167	100.975	-0.99233	6.96633e-20	7.85475e-19	S000002918	YDR510W	SMT3	Suppressor of Mif Two
YLR278C	150.124	141.222	292.944	305.452	1.03817	7.12398e-20	8.01051e-19	S000004268	YLR278C
YDR475C	142.976	130.706	309.465	277.188	1.09992	7.12694e-20	8.01051e-19	S000002883	YDR475C	JIP4	Jumonji domain Interacting Protein
YLR228C	77.2209	71.5877	142.416	143.055	0.939485	7.1999e-20	8.07976e-19	S000004218	YLR228C	ECM22	ExtraCellular Mutant
YHL050C	8.06891	9.91561	25.8871	26.6846	1.54852	7.5836e-20	8.49697e-19	S000001042	YHL050C
YNL303W	9.41373	9.23954	1.6963	2.21056	-2.25525	7.85232e-20	8.78424e-19	S000005247	YNL303W
YPL098C	114.805	124.321	62.3945	60.3167	-0.962007	7.96911e-20	8.90093e-19	S000006019	YPL098C	MGR2	Mitochondrial Genome Required
YNL020C	63.8435	65.8036	125.895	120.949	0.929182	8.02761e-20	8.95223e-19	S000004965	YNL020C	ARK1	Actin Regulating Kinase
YOL159C	97.9595	106.142	45.4314	53.8429	-1.0404	8.64483e-20	9.62548e-19	S000005519	YOL159C		Condition Specific Secretion
YOR129C	18.332	16.3007	41.1538	44.8428	1.31031	9.31388e-20	1.03542e-18	S000005655	YOR129C	AFI1	ArF3-Interacting protein
YLR263W	30.0107	26.7421	62.4682	60.8693	1.11891	9.6818e-20	1.07465e-18	S000004253	YLR263W	RED1	REDuctional division
YOR273C	117.212	113.879	251.201	219.793	1.0273	9.80264e-20	1.08637e-18	S000005799	YOR273C	TPO4	Transporter of POlyamines
YER109C	54.2882	51.9818	101.926	119.607	1.05903	9.90719e-20	1.09625e-18	S000000911	YER109C	FLO8	FLOcculation
YOL139C	309.096	364.023	157.314	155.213	-1.1067	1.02419e-19	1.13153e-18	S000005499	YOL139C	CDC33	Cell Division Cycle
YGL123W	658.749	895.259	311.456	274.504	-1.40696	1.0472e-19	1.15517e-18	S000003091	YGL123W	RPS2	Ribosomal Protein of the Small subunit
YDR513W	806.891	827.578	366.254	398.848	-1.09513	1.08455e-19	1.19451e-18	S000002921	YDR513W	GRX2	GlutaRedoXin
YOR310C	140.215	192.152	65.7133	70.58	-1.28583	1.12891e-19	1.24145e-18	S000005837	YOR310C	NOP58	NucleOlar Protein of 58 kDa
YOL039W	273.14	395.347	124.051	122.37	-1.43954	1.46275e-19	1.60609e-18	S000005399	YOL039W	RPP2A	Ribosomal Protein P2 Alpha
YKL160W	228.336	221.298	111.071	119.291	-0.965041	1.53632e-19	1.68428e-18	S000001643	YKL160W	ELF1	ELongation Factor
YDL192W	309.662	372.662	159.01	152.292	-1.13191	1.61881e-19	1.77198e-18	S000002351	YDL192W	ARF1	ADP-Ribosylation Factor
YFR023W	10.8293	8.18789	27.7309	30.2373	1.60399	1.64147e-19	1.79404e-18	S000001919	YFR023W	PES4	Polymerase Epsilon Suppressor
YHR121W	188.629	178.105	92.8542	97.0277	-0.949818	1.69692e-19	1.8518e-18	S000001163	YHR121W	LSM12	Like SM
YGR225W	18.1197	19.6059	44.1039	44.6849	1.23501	1.72662e-19	1.88133e-18	S000003457	YGR225W	AMA1	Activator of Meiotic APC/C
YNL178W	856.721	1104.09	415.595	389.769	-1.28364	1.94063e-19	2.11129e-18	S000005122	YNL178W	RPS3	Ribosomal Protein of the Small subunit
YBL066C	125.847	110.274	239.843	242.609	1.03051	2.12665e-19	2.31014e-18	S000000162	YBL066C	SEF1	Suppressor of Essential Function
YPR062W	302.938	298.67	153.11	142.028	-1.02725	2.23987e-19	2.42943e-18	S000006266	YPR062W	FCY1	FluoroCYtosine resistance
YBR052C	415.266	437.639	207.613	210.161	-1.02962	2.39874e-19	2.59778e-18	S000000256	YBR052C	RFS1	Rad55 (Fifty-five) Suppressor
YHR087W	319.005	375.065	159.231	165.002	-1.09796	2.48782e-19	2.69016e-18	S000001129	YHR087W	RTC3	Restriction of Telomere Capping
YOR009W	12.7404	11.6433	30.9022	32.4478	1.37556	2.49315e-19	2.69185e-18	S000005535	YOR009W	TIR4	TIp1-Related
YOR204W	146.302	148.659	299.066	292.899	1.00499	2.56971e-19	2.77031e-18	S000005730	YOR204W	DED1	Defines Essential Domain
YMR184W	95.5529	115.682	46.6115	51.8692	-1.10091	2.61109e-19	2.81067e-18	S000004796	YMR184W	ADD37	Alpha1-proteinase inhibitor-Degradation Deficient
YKL062W	213.048	221.599	115.275	110.607	-0.944035	2.68869e-19	2.88984e-18	S000001545	YKL062W	MSN4	Multicopy suppressor of SNF1 mutation
YLR343W	10.3339	10.3663	26.7721	30.2373	1.46	2.79765e-19	3.00242e-18	S000004335	YLR343W	GAS2	Glycophospholipid-Anchored Surface protein
YDL092W	113.885	128.602	55.388	63.0799	-1.03365	3.2056e-19	3.43506e-18	S000002250	YDL092W	SRP14	Signal Recognition Particle
YDL232W	38.0088	42.7423	15.488	16.7371	-1.32505	3.26332e-19	3.49165e-18	S000002391	YDL232W	OST4	OligoSaccharylTransferase
YLR164W	61.7909	54.9114	122.576	111.238	1.00219	3.48423e-19	3.72243e-18	S000004154	YLR164W	SHH4	SDH4 Homolog
YKL095W	43.742	37.6342	86.8065	79.5801	1.03118	3.81318e-19	4.06777e-18	S000001578	YKL095W	YJU2
YPR052C	68.0903	75.1182	36.2124	31.8952	-1.07076	3.85996e-19	4.11153e-18	S000006256	YPR052C	NHP6A	Non-Histone Protein
YMR178W	165.979	156.997	85.2577	87.396	-0.903694	3.90848e-19	4.15699e-18	S000004790	YMR178W
YGR205W	71.2046	84.508	35.8436	38.1321	-1.07345	4.13155e-19	4.3877e-18	S000003437	YGR205W	TDA10	Topoisomerase I Damage Affected
YCR098C	49.8999	46.4231	100.746	89.6066	0.982625	4.14569e-19	4.39616e-18	S000000695	YCR098C	GIT1	GlycerophosphoInosiTol
YPL092W	82.3879	68.8834	148.463	160.266	1.0284	4.4601e-19	4.72253e-18	S000006013	YPL092W	SSU1	Sensitive to SUlfite
YDL075W	659.598	810.301	330.927	308.215	-1.20138	4.61074e-19	4.87479e-18	S000002233	YDL075W	RPL31A	Ribosomal Protein of the Large subunit
YLR038C	775.465	705.961	318.241	360.242	-1.1267	4.63213e-19	4.89016e-18	S000004028	YLR038C	COX12	Cytochrome c OXidase
YGL122C	212.765	213.787	453.946	420.243	1.03525	4.67941e-19	4.93276e-18	S000003090	YGL122C	NAB2	Nuclear polyAdenylated RNA-Binding
YJL062W-A	163.502	168.791	89.3141	89.6855	-0.892379	5.03965e-19	5.30466e-18	S000007611	YJL062W-A	COA3	Cytochrome Oxidase Assembly
YLR030W	23.4282	23.6622	53.3967	51.2376	1.15182	5.18606e-19	5.45072e-18	S000004020	YLR030W
YGR215W	108.86	111.4	50.0041	58.8167	-1.01792	5.34077e-19	5.60506e-18	S000003447	YGR215W	RSM27	Ribosomal Small subunit of Mitochondria
YKR053C	46.7855	40.4136	86.4378	87.8697	0.99822	5.46434e-19	5.72631e-18	S000001761	YKR053C	YSR3	Yeast Sphingolipid Resistance
YMR094W	14.156	13.5964	34.1473	34.0268	1.29567	5.61193e-19	5.87234e-18	S000004700	YMR094W	CTF13	Chromosome Transmission Fidelity
YJR086W	96.4023	91.494	42.3339	50.4481	-1.01907	5.71411e-19	5.97049e-18	S000003846	YJR086W	STE18	STErile
YPL187W	2.4773	1.95307	9.4403	10.0265	2.12631	5.94044e-19	6.19789e-18	S000006108	YPL187W	MF(ALPHA)1	Mating Factor ALPHA
YFL067W	4.74226	4.50709	18.9544	14.8423	1.86838	6.2884e-19	6.55134e-18	S000001827	YFL067W
YNL234W	20.0307	17.5777	43.3664	48.2376	1.28246	6.56375e-19	6.82821e-18	S000005178	YNL234W
YJR004C	53.722	52.5077	98.1644	103.028	0.920961	6.73362e-19	6.99472e-18	S000003764	YJR004C	SAG1	Sexual AGglutination
YOL047C	32.0633	34.329	67.6309	65.7641	1.00703	7.12729e-19	7.39288e-18	S000005407	YOL047C	LDS2	Lipid Droplets in Sporulation
YLR154W-E	38.0796	27.7938	74.7111	84.9486	1.27524	7.27824e-19	7.53848e-18	S000028676	YLR154W-E
YPL149W	53.5804	47.3996	100.893	95.3698	0.958155	7.33332e-19	7.58451e-18	S000006070	YPL149W	ATG5	AuTophaGy related
YGL115W	164.705	169.091	91.4529	88.5013	-0.89108	7.58131e-19	7.82962e-18	S000003083	YGL115W	SNF4	Sucrose NonFermenting
YOR019W	116.787	100.959	211.374	238.977	1.04788	8.25642e-19	8.51451e-18	S000005545	YOR019W
YBR280C	196.485	181.26	398.853	373.821	1.03236	9.13067e-19	9.40248e-18	S000000484	YBR280C	SAF1	SCF Associated Factor
YML131W	208.518	215.514	429.681	422.138	1.00639	9.22673e-19	9.48769e-18	S000004600	YML131W
YDR534C	14.4391	16.526	38.2775	37.5795	1.2934	9.4396e-19	9.69259e-18	S000002942	YDR534C	FIT1	Facilitator of Iron Transport
YBR211C	59.8798	59.1181	25.9608	29.2899	-1.10765	9.9736e-19	1.02262e-17	S000000415	YBR211C	AME1	Associated with Microtubules and Essential
YOR181W	79.9813	72.8647	159.6	141.397	0.977537	1.02618e-18	1.05066e-17	S000005707	YOR181W	LAS17
YPL016W	62.8526	61.2214	113.726	122.133	0.926279	1.03361e-18	1.05674e-17	S000005937	YPL016W	SWI1	SWItching deficient
YPL210C	131.368	150.537	70.3597	73.58	-0.969568	1.15015e-18	1.1742e-17	S000006131	YPL210C	SRP72	Signal Recognition Particle
YOR051C	70.0722	92.6959	34.3686	35.5268	-1.21888	1.19609e-18	1.21936e-17	S000005577	YOR051C	ETT1	Enhancer of Translation Termination 1
YOL156W	5.52084	5.3334	16.2255	18.6319	1.67995	1.31271e-18	1.33634e-17	S000005516	YOL156W	HXT11	HeXose Transporter
YPL201C	235.414	207.552	460.583	458.454	1.05277	1.38617e-18	1.40911e-17	S000006122	YPL201C	YIG1	Yeast protein Interacting with Glycerol 3-phosphatase
YCR020W-B	36.4517	38.4605	14.8242	16.1055	-1.2763	1.39765e-18	1.41876e-17	S000006439	YCR020W-B	HTL1	High-Temperature Lethal
YPR152C	30.6477	27.0426	60.5507	62.0535	1.0864	1.40329e-18	1.42246e-17	S000006356	YPR152C	URN1	U2-U5-U6 snRNP
YIL051C	645.584	676.44	324.658	322.189	-1.03121	1.41264e-18	1.4299e-17	S000001313	YIL051C	MMF1	Mitochondrial Matrix Factor
YCR043C	51.6694	68.2825	22.8632	23.4477	-1.37214	1.43751e-18	1.45301e-17	S000000639	YCR043C
YIL011W	10.6878	12.695	30.0172	33.1584	1.43422	1.49377e-18	1.50773e-17	S000001273	YIL011W	TIR3	TIp1-Related
YMR260C	263.938	316.022	134.672	135.949	-1.09951	1.52295e-18	1.53502e-17	S000004873	YMR260C	TIF11	Translation Initiation Factor
YDL156W	11.6079	12.3194	32.6723	29.4478	1.37691	1.60792e-18	1.61837e-17	S000002315	YDL156W	CMR1	Changed Mutation Rate
YDR379C-A	254.525	217.092	98.3856	118.502	-1.12115	1.65124e-18	1.65962e-17	S000007605	YDR379C-A	SDH6
YKL009W	85.0067	97.3532	46.3902	46.4217	-0.973848	2.01121e-18	2.01858e-17	S000001492	YKL009W	MRT4	mRNA Turnover 4
YGL166W	34.2575	27.2679	69.401	66.9484	1.14663	2.07279e-18	2.07745e-17	S000003134	YGL166W	CUP2
YDR063W	99.5166	110.198	53.5442	54.4745	-0.956844	2.1529e-18	2.15471e-17	S000002470	YDR063W	AIM7	Altered Inheritance rate of Mitochondria
YGR169C-A	79.769	97.6537	41.1538	43.1059	-1.07385	2.19177e-18	2.19054e-17	S000028521	YGR169C-A	LSO2	Late-annotated Small Open reading frame
YGL222C	73.6112	67.8318	36.2124	35.0531	-0.988823	2.23008e-18	2.22571e-17	S000003190	YGL222C	EDC1	Enhancer of mRNA DeCapping
YMR242C	386.954	520.945	187.036	189.082	-1.27121	2.24241e-18	2.23488e-17	S000004855	YMR242C	RPL20A	Ribosomal Protein of the Large subunit
YDR487C	152.318	175.927	86.069	82.817	-0.958255	2.27005e-18	2.25927e-17	S000002895	YDR487C	RIB3	RIBoflavin biosynthesis
YHR174W	1565.94	2227.41	733.393	596.377	-1.51222	2.27663e-18	2.26266e-17	S000001217	YHR174W	ENO2	ENOlase
YOR034C	70.6384	59.7941	125.674	132.16	0.982278	2.37398e-18	2.35309e-17	S000005560	YOR034C	AKR2	AnKyrin Repeat-containing protein
YGR065C	55.5623	51.9067	104.655	98.7646	0.920279	2.37422e-18	2.35309e-17	S000003297	YGR065C	VHT1	Vitamin H Transporter
YCR069W	124.927	119.213	253.339	229.74	0.984533	2.38696e-18	2.36243e-17	S000000665	YCR069W	CPR4	Cyclosporin-sensitive Proline Rotamase
YEL077C	42.6803	40.5639	81.3488	77.1327	0.928663	2.49583e-18	2.46675e-17	S000006409	YEL077C
YML022W	103.551	121.166	52.0692	57.4745	-1.03661	2.53004e-18	2.4971e-17	S000004484	YML022W	APT1	Adenine PhosphoribosylTransferase
YKR074W	272.644	237.975	115.349	129.081	-1.06313	2.55713e-18	2.52035e-17	S000001782	YKR074W	AIM29	Altered Inheritance rate of Mitochondria
YHR205W	123.369	113.504	231.582	223.661	0.942329	2.57711e-18	2.53653e-17	S000001248	YHR205W	SCH9
YOL026C	88.6873	95.0246	47.5703	49.7376	-0.916749	2.65532e-18	2.6099e-17	S000005386	YOL026C	MIM1	Mitochondrial IMport
YFR053C	2687.66	2915.19	1361.91	1222.75	-1.11615	3.21347e-18	3.15416e-17	S000001949	YFR053C	HXK1	HeXoKinase
YNL074C	162.582	163.758	340.072	309.873	0.994003	3.36189e-18	3.29346e-17	S000005018	YNL074C	MLF3	Multicopy suppressor of LeFlunomide sensitivity
YMR117C	12.9527	12.0189	30.386	32.6057	1.33306	3.36463e-18	3.29346e-17	S000004723	YMR117C	SPC24	Spindle Pole Component
YIL111W	203.563	234.068	97.2056	112.896	-1.05878	3.59125e-18	3.51045e-17	S000001373	YIL111W	COX5B	Cytochrome c OXidase
YBR252W	51.8109	64.0007	21.7569	25.1846	-1.30292	3.75716e-18	3.66761e-17	S000000456	YBR252W	DUT1	DUTp pyrophosphatase
YHR043C	78.495	90.217	39.6788	44.2901	-1.00675	3.92833e-18	3.82945e-17	S000001085	YHR043C	DOG2	DeOxyGlucose
YOR276W	82.8125	99.2312	41.7438	46.1849	-1.04982	4.04229e-18	3.93516e-17	S000005802	YOR276W	CAF20	Cap Associated Factor
YKL180W	536.512	666.75	277.899	250.346	-1.1875	4.32582e-18	4.20543e-17	S000001663	YKL180W	RPL17A	Ribosomal Protein of the Large subunit
YGR087C	18.2612	14.2725	47.939	40.5795	1.4425	4.41552e-18	4.28678e-17	S000003319	YGR087C	PDC6	Pyruvate DeCarboxylase
YOR020C	717.355	812.028	355.339	370.663	-1.07488	4.58711e-18	4.44731e-17	S000005546	YOR020C	HSP10	Heat Shock Protein
YOL120C	637.02	882.714	310.35	289.031	-1.34215	4.68111e-18	4.53228e-17	S000005480	YOL120C	RPL18A	Ribosomal Protein of the Large subunit
YPR007C	18.4028	15.4744	40.195	48.0797	1.3793	4.78729e-18	4.6288e-17	S000006211	YPR007C	REC8	RECombination
YNL321W	130.164	124.696	284.315	242.767	1.04836	5.0591e-18	4.88498e-17	S000005265	YNL321W	VNX1	Vacuolar Na+/H+ eXchanger
YMR143W	700.651	861.606	336.901	358.979	-1.16669	5.20701e-18	5.02099e-17	S000004751	YMR143W	RPS16A	Ribosomal Protein of the Small subunit
YNL147W	115.867	115.832	47.2015	61.1062	-1.09809	5.2882e-18	5.0924e-17	S000005091	YNL147W	LSM7	Like SM
YFR012W	6.3702	5.25828	17.3318	18.2371	1.60858	6.05567e-18	5.82358e-17	S000001908	YFR012W	DCV1	Demands Cdc28 kinase activity for Viability
YDL025C	190.752	170.969	383.365	354.005	1.0274	6.09763e-18	5.85603e-17	S000002183	YDL025C	RTK1	Ribosome biogenesis and TRNA synthetase-associated Kinase
YNL153C	60.7292	71.5126	31.1972	30.3162	-1.10322	6.27741e-18	6.02057e-17	S000005097	YNL153C	GIM3	Gene Involved in Microtubule biogenesis
YDR056C	236.759	225.805	123.093	118.502	-0.936971	6.51194e-18	6.23711e-17	S000002463	YDR056C	EMC10	ER Membrane protein Complex
YHL027W	164.847	151.438	356.519	304.347	1.0631	6.85297e-18	6.55494e-17	S000001019	YHL027W	RIM101	Regulator of IME2
YDL165W	91.023	97.804	51.1104	50.685	-0.890968	7.09893e-18	6.7811e-17	S000002324	YDL165W	CDC36	Cell Division Cycle
YLL038C	24.9145	19.7561	60.2557	51.5534	1.32245	7.13884e-18	6.81009e-17	S000003961	YLL038C	ENT4	Epsin N-Terminal homology
YML109W	33.8328	37.7094	68.0734	80.3696	1.05284	7.19353e-18	6.85309e-17	S000004577	YML109W	ZDS2	Zillion Different Screens
YDR226W	403.304	497.133	212.776	188.687	-1.16511	7.46346e-18	7.10075e-17	S000002634	YDR226W	ADK1	ADenylate Kinase
YNL018C	6.44098	4.50709	18.6593	17.6055	1.72245	8.53241e-18	8.10693e-17	S000004963	YNL018C
YGL031C	549.677	728.947	268.459	272.293	-1.24146	8.70604e-18	8.26088e-17	S000002999	YGL031C	RPL24A	Ribosomal Protein of the Large subunit
YNR046W	44.4498	54.6861	19.9131	20.6845	-1.28723	8.75113e-18	8.29263e-17	S000005329	YNR046W	TRM112	TRna Methyltransferase
YJR146W	23.9944	24.3383	55.9043	50.5271	1.13912	8.79567e-18	8.32376e-17	S000003907	YJR146W
YIR015W	26.9672	23.9627	56.3468	54.3166	1.11866	9.71108e-18	9.17788e-17	S000001454	YIR015W	RPR2	RNase P Ribonucleoprotein
YHR030C	237.891	309.863	122.65	119.37	-1.17812	1.02632e-17	9.68682e-17	S000001072	YHR030C	SLT2	Suppressor of the LyTic phenotype
YOR176W	131.438	153.767	301.647	289.031	1.0506	1.1305e-17	1.0656e-16	S000005702	YOR176W	HEM15	HEMe biosynthesis
YJL103C	114.805	102.762	206.949	209.529	0.936433	1.19825e-17	1.12797e-16	S000003639	YJL103C	GSM1	Glucose Starvation Modulator
YBR154C	99.729	111.926	54.2817	55.5798	-0.945733	1.28959e-17	1.21235e-16	S000000358	YBR154C	RPB5	RNA Polymerase B
YGL069C	86.9178	95.7006	49.5616	46.9744	-0.918898	1.43317e-17	1.34506e-16	S000003037	YGL069C
YLR284C	57.7564	50.4795	106.277	102.949	0.950244	1.43453e-17	1.34506e-16	S000004274	YLR284C	ECI1	Enoyl-CoA Isomerase
YDL199C	103.268	89.1654	188.659	182.924	0.948919	1.70428e-17	1.59588e-16	S000002358	YDL199C
YPR105C	92.1555	113.729	51.9954	47.7639	-1.04429	1.74813e-17	1.6348e-16	S000006309	YPR105C	COG4	Conserved Oligomeric Golgi complex
YPL272C	18.8275	25.2397	53.4705	69.9484	1.48613	1.82185e-17	1.70151e-16	S000006193	YPL272C	PBI1	PSTB2 Interacting protein 1
YML077W	39.2829	48.1508	17.1843	17.7634	-1.32209	1.93279e-17	1.80276e-16	S000004542	YML077W	BET5	Blocked Early in Transport
YJR069C	36.027	46.0475	14.7505	15.7897	-1.42544	2.14621e-17	1.9992e-16	S000003830	YJR069C	HAM1	6-n-HydroxylAMinopurine sensitive
YPL113C	27.9581	25.9909	55.7568	56.6061	1.05764	2.16811e-17	2.01696e-16	S000006034	YPL113C
YJL140W	270.875	273.881	134.672	144.871	-0.962643	2.17631e-17	2.02195e-16	S000003676	YJL140W	RPB4	RNA Polymerase B
YJR135W-A	171.571	135.513	62.1732	75.4748	-1.1584	2.20418e-17	2.04518e-16	S000007348	YJR135W-A	TIM8	Translocase of the Inner Mitochondrial membrane
YDR446W	1.69872	0.901419	6.71146	9.15803	2.58844	2.24022e-17	2.07592e-16	S000002854	YDR446W	ECM11	ExtraCellular Mutant
YIL156W	70.0014	73.3154	128.919	130.897	0.858348	2.26049e-17	2.09198e-16	S000001418	YIL156W	UBP7	UBiquitin-specific Protease
YGR165W	164.847	174.875	91.8954	95.6067	-0.857423	2.40389e-17	2.22181e-16	S000003397	YGR165W	MRPS35	Mitochondrial Ribosomal Protein
YJL198W	53.4389	42.8174	97.5006	95.9225	1.00571	2.47423e-17	2.28386e-16	S000003734	YJL198W	PHO90	PHOsphate metabolism
YBR268W	176.171	156.171	85.774	90.9487	-0.91154	2.53918e-17	2.34078e-16	S000000472	YBR268W	MRPL37	Mitochondrial Ribosomal Protein
YDL204W	1003.87	922.527	2066.25	1937.48	1.05542	2.58325e-17	2.37833e-16	S000002363	YDL204W	RTN2	ReTiculoN-like
YER154W	248.862	269.825	136.663	115.817	-1.03823	2.65279e-17	2.4392e-16	S000000956	YER154W	OXA1	cytochrome OXidase Activity
YLR354C	630.012	728.347	325.764	327.715	-1.05559	2.66191e-17	2.44442e-16	S000004346	YLR354C	TAL1	TransALdolase
YPL037C	375.134	459.874	201.713	177.713	-1.1377	2.69208e-17	2.46895e-16	S000005958	YPL037C	EGD1	Enhancer of Gal4 DNA binding
YNR058W	15.7839	19.0049	42.3339	40.5795	1.25416	2.72445e-17	2.49543e-16	S000005341	YNR058W	BIO3	BIOtin
YKR083C	71.1339	54.3856	18.5856	25.7372	-1.5036	2.99446e-17	2.73922e-16	S000001791	YKR083C	DAD2	Duo1 And Dam1 interacting
YHR032W	75.4514	61.1463	154.511	132.239	1.06943	3.20494e-17	2.928e-16	S000001074	YHR032W	ERC1	Ethionine Resistance Conferring
YAL033W	46.2193	42.3667	17.9218	20.4477	-1.20825	3.21742e-17	2.93564e-16	S000000031	YAL033W	POP5	Processing Of Precursor RNAs
YMR286W	151.398	141.147	76.3337	82.1065	-0.885108	3.3738e-17	3.07439e-16	S000004899	YMR286W	MRPL33	Mitochondrial Ribosomal Protein
YMR235C	125.493	144.603	72.5723	68.9221	-0.932117	3.44567e-17	3.13586e-16	S000004848	YMR235C	RNA1	rapid cessation of net RNA accumulation
YAL046C	111.408	112.152	53.1754	62.2904	-0.953856	3.48422e-17	3.16691e-16	S000000044	YAL046C	AIM1	Altered Inheritance of Mitochondria
YHL021C	661.226	711.745	1382.86	1395.81	1.0171	4.24624e-17	3.85461e-16	S000001013	YHL021C	AIM17	Altered Inheritance rate of Mitochondria
YML123C	119.193	105.691	228.559	207.003	0.953509	4.31967e-17	3.91628e-16	S000004592	YML123C	PHO84	PHOsphate metabolism
YKL164C	440.605	462.653	932.008	878.697	1.00337	4.41745e-17	3.99984e-16	S000001647	YKL164C	PIR1	Protein containing Internal Repeats
YBR048W	287.437	403.235	148.463	130.976	-1.30513	4.46585e-17	4.03853e-16	S000000252	YBR048W	RPS11B	Ribosomal Protein of the Small subunit
YOR135C	75.7346	81.1277	42.0388	42.4743	-0.891908	5.23556e-17	4.72859e-16	S000005661	YOR135C	IRC14
YGL225W	135.119	129.354	74.7111	71.5274	-0.854608	5.50137e-17	4.96237e-16	S000003193	YGL225W	VRG4	Vandate Resistance Glycosylation
YNL217W	162.652	165.185	92.7067	90.9487	-0.835803	5.58513e-17	5.03156e-16	S000005161	YNL217W
YNL078W	180.56	180.81	100.229	99.0015	-0.858925	5.633e-17	5.06828e-16	S000005022	YNL078W	NIS1	Neck protein Interacting with Septins
YDR016C	61.6493	62.1979	29.8697	32.4478	-0.991279	5.65571e-17	5.08229e-16	S000002423	YDR016C	DAD1	Duo1 And Dam1 interacting
YBR049C	64.9052	69.4093	121.839	121.66	0.85851	5.75127e-17	5.16166e-16	S000000253	YBR049C	REB1	RNA polymerase I Enhancer Binding protein
snR44	29.1613	25.2397	9.95657	10.6581	-1.40068	5.77273e-17	5.1744e-16	S000006504	snR44	SNR44	Small Nucleolar RNA
YBL057C	65.1176	70.536	35.7699	31.5005	-1.01047	6.05772e-17	5.42303e-16	S000000153	YBL057C	PTH2	Peptidyl-Trna Hydrolase
YOR226C	65.6838	67.9069	33.1886	35.6058	-0.957687	6.65875e-17	5.95361e-16	S000005752	YOR226C	ISU2	IscU homolog
YDL208W	120.184	150.762	67.3359	65.6852	-1.02578	6.80934e-17	6.08062e-16	S000002367	YDL208W	NHP2	Non-Histone Protein
YOR083W	23.145	18.8547	52.8804	47.0533	1.24937	6.91288e-17	6.16535e-16	S000005609	YOR083W	WHI5	WHIskey
YML129C	187.567	189.148	98.2381	106.423	-0.880431	7.37734e-17	6.57136e-16	S000004598	YML129C	COX14	Cytochrome c OXidase
YJR007W	96.6854	106.067	51.9954	56.2903	-0.904949	7.48825e-17	6.66183e-16	S000003767	YJR007W	SUI2	SUppressor of Initiator codon
YPR153W	9.34295	9.23954	23.0845	24.8688	1.36613	7.51795e-17	6.67991e-16	S000006357	YPR153W		genetic interaction profile similarity to MTC Annotated Yeast genes MTC2 and MTC4
YOR238W	68.1611	75.2685	32.8935	38.4479	-1.00808	7.89131e-17	7.00292e-16	S000005764	YOR238W
YLL055W	95.9068	84.5831	165.353	167.608	0.882942	7.98575e-17	7.07792e-16	S000003978	YLL055W	YCT1	Yeast Cysteine Transporter
YDL082W	328.419	438.014	173.982	157.265	-1.20997	8.04612e-17	7.12257e-16	S000002240	YDL082W	RPL13A	Ribosomal Protein of the Large subunit
YHR067W	37.8673	36.8831	67.9997	73.659	0.921538	8.3884e-17	7.41635e-16	S000001109	YHR067W	HTD2	Hydroxyacyl-Thioester Dehydratase
YDL109C	34.8945	28.1693	74.0474	64.422	1.13379	8.60088e-17	7.59478e-16	S000002267	YDL109C
YLR292C	94.7744	105.992	44.3252	54.7903	-1.01899	8.83588e-17	7.79263e-16	S000004283	YLR292C	SEC72	SECretory
YHR007C	358.217	365.751	741.58	693.326	0.98698	9.04644e-17	7.96847e-16	S000001049	YHR007C	ERG11	ERGosterol biosynthesis
YLL043W	122.449	108.17	228.411	211.898	0.932781	9.15804e-17	8.05681e-16	S000003966	YLL043W	FPS1	fdp1 Suppressor
YOR210W	67.5241	66.7801	35.0324	35.7637	-0.923799	9.75092e-17	8.56783e-16	S000005736	YOR210W	RPB10	RNA Polymerase B
YMR142C	583.368	752.61	307.326	282.715	-1.17887	1.08694e-16	9.5388e-16	S000004750	YMR142C	RPL13B	Ribosomal Protein of the Large subunit
YDR473C	98.2426	90.8931	168.598	170.055	0.84005	1.10412e-16	9.67769e-16	S000002881	YDR473C	PRP3	Pre-mRNA Processing
YER074W	331.887	431.479	177.227	166.345	-1.15153	1.13768e-16	9.95961e-16	S000000876	YER074W	RPS24A	Ribosomal Protein of the Small subunit
YJL083W	41.4063	39.2117	75.3749	73.0274	0.879983	1.14987e-16	1.0054e-15	S000003619	YJL083W	TAX4
YJL003W	67.9488	75.7192	35.1799	38.9216	-0.955325	1.16952e-16	1.02133e-15	S000003540	YJL003W	COX16	Cytochrome c OXidase
YGR055W	276.962	299.722	148.242	148.976	-0.956155	1.18772e-16	1.03595e-15	S000003287	YGR055W	MUP1	Methionine UPtake
YLR406C	389.29	510.579	196.624	204.161	-1.16679	1.29574e-16	1.12878e-15	S000004398	YLR406C	RPL31B	Ribosomal Protein of the Large subunit
YDL228C	15.9963	16.8265	6.04769	4.57901	-1.62092	1.33989e-16	1.16582e-15	S000002387	YDL228C
YDL064W	106.17	104.865	53.5442	59.6851	-0.898758	1.41494e-16	1.22825e-15	S000002222	YDL064W	UBC9	UBiquitin-Conjugating
YML087C	188.487	175.777	96.7631	101.923	-0.874728	1.4151e-16	1.22825e-15	S000004552	YML087C	AIM33	Altered Inheritance rate of Mitochondria
YBR180W	4.2468	4.20662	13.4229	13.1055	1.64787	1.49899e-16	1.29949e-15	S000000384	YBR180W	DTR1	DiTyRosine
ICR1	12.2449	9.84049	29.5009	27.8688	1.37477	1.5922e-16	1.37862e-15	S000132612	ICR1	ICR1	Interfering Crick RNA
YDR443C	45.1576	36.207	80.4638	82.6591	1.00211	1.64265e-16	1.42058e-15	S000002851	YDR443C	SSN2	Suppressor of SNf1
YNL010W	160.387	184.34	91.2317	94.2645	-0.893881	1.7596e-16	1.51986e-15	S000004955	YNL010W
YDR154C	230.176	247.965	128.993	104.844	-1.03138	1.77685e-16	1.53291e-15	S000002561	YDR154C
YMR290W-A	19.1106	16.4509	5.82644	6.31588	-1.55094	2.24806e-16	1.93708e-15	S000004904	YMR290W-A
YBR203W	161.378	145.955	290.658	305.768	0.956291	2.30504e-16	1.98378e-15	S000000407	YBR203W	COS111	Ciclopirox Olamine Sensitive
YDL093W	65.4715	53.4091	115.201	116.844	0.963974	2.60664e-16	2.24064e-15	S000002251	YDL093W	PMT5	Protein O-MannosylTransferase
YNL186W	120.538	118.837	222.068	211.74	0.857779	2.75032e-16	2.3613e-15	S000005130	YNL186W	UBP10	UBiquitin-specific Protease
YER039C-A	9.55529	8.11277	25.2233	22.3424	1.42693	2.83033e-16	2.42707e-15	S000007226	YER039C-A
YOL011W	109.709	103.964	194.264	192.003	0.854014	2.86935e-16	2.45757e-15	S000005371	YOL011W	PLB3	PhosphoLipase B
YLR285C-A	6.0163	4.58221	0.516266	0.947382	-2.85573	2.94611e-16	2.52029e-15	S000028569	YLR285C-A
YGL116W	26.4009	22.0096	53.0279	52.8166	1.12708	2.95704e-16	2.5266e-15	S000003084	YGL116W	CDC20	Cell Division Cycle
YBR029C	56.0577	56.8645	102.516	101.212	0.851327	3.0533e-16	2.60573e-15	S000000233	YBR029C	CDS1	CDP-Diacylglycerol Synthase
YKL046C	210.853	195.758	407.556	380.137	0.953914	3.06667e-16	2.61401e-15	S000001529	YKL046C	DCW1	Defective Cell Wall
YLR373C	70.7092	71.4375	131.5	122.449	0.83734	3.10489e-16	2.64342e-15	S000004365	YLR373C	VID22	Vacuolar Import and Degradation
YMR034C	71.3462	58.8927	126.928	123.239	0.941006	3.16734e-16	2.69337e-15	S000004637	YMR034C	RCH1	Regulator of Calcium Homeostasis
YHR039C	180.489	171.119	351.282	322.189	0.937615	3.22307e-16	2.7375e-15	S000001081	YHR039C	MSC7	Meiotic Sister-Chromatid recombination
YBR003W	153.522	158.124	87.249	89.7645	-0.816038	3.22894e-16	2.73922e-15	S000000207	YBR003W	COQ1	COenzyme Q
YLR449W	122.308	146.18	66.8196	72.08	-0.950689	3.80021e-16	3.22002e-15	S000004441	YLR449W	FPR4	FKBP Proline Rotamase (isomerase)
YGR271C-A	84.582	71.137	29.0584	39.3164	-1.18907	3.92037e-16	3.31788e-15	S000007608	YGR271C-A	EFG1	Exit From G1
YDR012W	174.685	221.223	100.303	86.9223	-1.07975	3.94203e-16	3.33226e-15	S000002419	YDR012W	RPL4B	Ribosomal Protein of the Large subunit
YOR317W	594.268	563.086	1159.98	1114.28	0.974541	3.99757e-16	3.3752e-15	S000005844	YOR317W	FAA1	Fatty Acid Activation
YGL102C	15.2885	14.7232	5.45767	3.86848	-1.67938	4.10934e-16	3.46547e-15	S000003070	YGL102C
YGL009C	1020.65	1007.56	2444.6	1967.08	1.12113	4.27617e-16	3.60189e-15	S000002977	YGL009C	LEU1	LEUcine biosynthesis
YNR035C	318.368	362.37	180.546	163.345	-0.984873	4.52581e-16	3.80766e-15	S000005318	YNR035C	ARC35	ARp2/3 Complex subunit
YBR189W	572.327	852.066	282.25	271.267	-1.36353	4.96002e-16	4.16805e-15	S000000393	YBR189W	RPS9B	Ribosomal Protein of the Small subunit
YKR019C	39.4244	39.7376	73.5311	70.3431	0.862057	5.22971e-16	4.38951e-15	S000001727	YKR019C	IRS4	Increased rDNA Silencing
YPR194C	118.769	128.077	70.9498	63.3167	-0.8777	5.29014e-16	4.43501e-15	S000006398	YPR194C	OPT2	OligoPeptide Transporter
YJL102W	135.827	113.954	246.185	244.03	0.972394	5.41385e-16	4.53338e-15	S000003638	YJL102W	MEF2	Mitochondrial Elongation Factor
YGL231C	220.338	240.754	119.553	126.791	-0.904373	5.51831e-16	4.61543e-15	S000003200	YGL231C	EMC4	ER Membrane protein Complex
YLR175W	273.777	352.079	135.631	150.871	-1.12725	5.66576e-16	4.7332e-15	S000004165	YLR175W	CBF5	Centromere Binding Factor
YLR170C	20.8093	18.5542	7.00647	7.50011	-1.44066	6.51585e-16	5.43699e-15	S000004160	YLR170C	APS1	clathrin Associated Protein complex Small subunit
YJL048C	326.225	318.126	632.131	606.641	0.942974	6.63277e-16	5.52808e-15	S000003584	YJL048C	UBX6	UBiquitin regulatory X
YOR312C	495.46	652.402	253.929	262.662	-1.15177	7.00844e-16	5.83437e-15	S000005839	YOR312C	RPL20B	Ribosomal Protein of the Large subunit
YOL049W	163.289	183.814	96.6156	95.2119	-0.855237	7.36223e-16	6.12173e-15	S000005409	YOL049W	GSH2	Glutathione
YGL018C	83.945	81.8789	46.759	45.4744	-0.846059	7.69205e-16	6.38852e-15	S000002986	YGL018C	JAC1	J-type Accessory Chaperone
YKR094C	380.655	481.433	209.383	194.134	-1.09499	7.93059e-16	6.57898e-15	S000001802	YKR094C	RPL40B	Ribosomal Protein of the Large subunit
YJR014W	166.474	178.706	94.7718	99.633	-0.82828	8.09264e-16	6.7056e-15	S000003775	YJR014W	TMA22	Translation Machinery Associated
YHR201C	98.1718	109.973	54.9455	57.1587	-0.892542	8.15056e-16	6.74575e-15	S000001244	YHR201C	PPX1
YBL102W	222.037	215.664	122.945	121.344	-0.841312	8.16953e-16	6.75361e-15	S000000198	YBL102W	SFT2	Suppressor of sed Five Ts
YOL163W	16.9872	18.4791	37.9087	40.4216	1.14304	8.42474e-16	6.95651e-15	S000005523	YOL163W
YPL111W	183.603	188.847	107.678	97.8962	-0.856972	8.52875e-16	7.03424e-15	S000006032	YPL111W	CAR1	Catabolism of ARginine
YMR266W	153.451	128.152	275.244	288.32	1.00056	8.54574e-16	7.04011e-15	S000004879	YMR266W	RSN1	Rescue of Sro7 at high Nacl
YJR010C-A	26.9672	29.9722	10.7678	12.237	-1.30766	8.65495e-16	7.12185e-15	S000003770	YJR010C-A	SPC1	Signal Peptidase Complex
YMR068W	40.6985	40.7141	71.5398	75.5537	0.85299	8.88059e-16	7.29403e-15	S000004672	YMR068W	AVO2	Adheres VOraciously (to TOR2)
YBL001C	601.276	567.218	284.905	313.189	-0.966292	8.88467e-16	7.29403e-15	S000000097	YBL001C	ECM15	ExtraCellular Mutant
YMR020W	117.212	97.5786	201.639	214.029	0.951973	9.76019e-16	8.00358e-15	S000004622	YMR020W	FMS1	Fenpropimorph-resistance Multicopy Suppressor
YDR139C	125.493	110.048	49.2666	63.5536	-1.06302	9.9943e-16	8.18614e-15	S000002546	YDR139C	RUB1	Related to UBiquitin
YPL075W	51.8109	52.2823	90.3466	92.8435	0.815287	1.00058e-15	8.18616e-15	S000005996	YPL075W	GCR1	GlyColysis Regulation
YJL122W	49.2628	54.6861	25.3708	23.8425	-1.07756	1.00181e-15	8.18616e-15	S000003658	YJL122W	ALB1	Arx1 Little Brother
YMR042W	35.5315	32.3008	73.6048	62.843	1.00817	1.00288e-15	8.18616e-15	S000004645	YMR042W	ARG80	ARGinine requiring
YMR164C	45.7239	45.5217	82.9714	79.0275	0.828236	1.0227e-15	8.33839e-15	S000004774	YMR164C	MSS11	Multicopy Suppressor of STA genes
YDL083C	540.051	735.408	275.908	280.662	-1.19629	1.0444e-15	8.50562e-15	S000002241	YDL083C	RPS16B	Ribosomal Protein of the Small subunit
YFR003C	87.7671	94.3485	51.4791	50.3692	-0.837921	1.05501e-15	8.58216e-15	S000001899	YFR003C	YPI1	Yeast Phosphatase Inhibitor
YAR014C	86.6347	88.1888	160.19	149.765	0.826321	1.06822e-15	8.67978e-15	S000000069	YAR014C	BUD14	BUD site selection
YCL042W	314.475	345.694	179.661	165.16	-0.936743	1.18081e-15	9.58363e-15	S000000547	YCL042W
YLR108C	19.1106	23.2115	45.2839	51.7113	1.19686	1.19149e-15	9.65937e-15	S000004098	YLR108C
YIL055C	100.508	97.5035	172.728	179.45	0.830493	1.23598e-15	1.00086e-14	S000001317	YIL055C
YMR131C	85.0067	95.7758	49.7091	49.1849	-0.869723	1.27146e-15	1.02842e-14	S000004738	YMR131C	RRB1	Regulator of Ribosome Biogenesis
YDR152W	114.097	120.339	63.0583	67.5799	-0.843744	1.31687e-15	1.06395e-14	S000002559	YDR152W	GIR2	Genetically Interacts with Ribosomal genes
YMR030W	61.437	52.1321	104.065	114.712	0.944869	1.31882e-15	1.06432e-14	S000004632	YMR030W	RSF1	ReSpiration Factor
YFL058W	2.26496	1.80284	8.40777	7.8159	1.98793	1.32245e-15	1.06604e-14	S000001836	YFL058W	THI5	THIamine metabolism
YML075C	276.679	243.383	515.824	500.928	0.967093	1.33442e-15	1.07348e-14	S000004540	YML075C	HMG1	3-Hydroxy-3-MethylGlutaryl-coenzyme a reductase
YGR245C	72.054	70.9867	122.945	127.739	0.809177	1.3347e-15	1.07348e-14	S000003477	YGR245C	SDA1	Severe Depolymerization of Actin
YCR082W	297.7	273.28	134.746	154.976	-0.979045	1.43573e-15	1.15344e-14	S000000678	YCR082W	AHC2	Ada Histone acetyltransferase complex Component
YNL079C	749.701	752.535	391.256	394.664	-0.934646	1.44817e-15	1.16212e-14	S000005023	YNL079C	TPM1	TroPoMyosin
YML081C-A	172.208	156.622	92.7805	92.3698	-0.828743	1.46695e-15	1.17587e-14	S000007247	YML081C-A	ATP18	ATP synthase
YGR260W	155.999	146.706	316.84	274.346	0.9657	1.60317e-15	1.28362e-14	S000003492	YGR260W	TNA1	Transporter of Nicotinic Acid
YIL098C	133.916	137.316	73.9736	79.6591	-0.820247	1.60672e-15	1.28502e-14	S000001360	YIL098C	FMC1	Formation of Mitochondrial Complexes
YLR306W	51.9525	50.7048	20.4294	25.6583	-1.15683	1.61546e-15	1.29056e-14	S000004297	YLR306W	UBC12	UBiquitin-Conjugating
YOR036W	361.332	326.239	648.283	721.984	0.994756	1.63057e-15	1.30117e-14	S000005562	YOR036W	PEP12	carboxyPEPtidase Y-deficient
YLR006C	65.2591	70.536	118.078	122.449	0.824898	1.72416e-15	1.37431e-14	S000003996	YLR006C	SSK1	Suppressor of Sensor Kinase
YDR510C-A	32.1341	31.1741	13.4229	14.4476	-1.18408	1.75962e-15	1.40101e-14	S000028615	YDR510C-A
YNR065C	51.1739	55.9631	93.4442	107.607	0.907945	1.83179e-15	1.45685e-14	S000005348	YNR065C
YLR047C	25.6223	25.9909	51.4054	52.5008	1.0092	1.85356e-15	1.47252e-14	S000004037	YLR047C	FRE8
YNL184C	28.3828	32.6013	12.6854	12.7107	-1.26254	1.85875e-15	1.475e-14	S000005128	YNL184C
YLR339C	98.2426	146.03	47.8653	52.185	-1.28744	1.88465e-15	1.49389e-14	S000004331	YLR339C
YOR077W	21.4463	19.4556	43.7351	43.1059	1.08518	1.95952e-15	1.5515e-14	S000005603	YOR077W	RTS2
YPL225W	592.357	510.203	223.322	281.925	-1.12599	1.99648e-15	1.57901e-14	S000006146	YPL225W
YOR011W	42.7511	41.6906	75.0061	75.238	0.830961	2.04421e-15	1.61497e-14	S000005537	YOR011W	AUS1	ABC protein involved in Uptake of Sterols
YGR253C	398.279	421.113	223.027	211.108	-0.916271	2.07542e-15	1.63781e-14	S000003485	YGR253C	PUP2	PUtative Proteasome subunit
YLL028W	61.7201	58.1415	112.177	104.37	0.853179	2.16886e-15	1.70966e-14	S000003951	YLL028W	TPO1	Transporter of POlyamines
YMR016C	87.2009	73.9915	175.752	145.502	0.994737	2.17883e-15	1.71562e-14	S000004618	YMR016C	SOK2	Suppressor Of Kinase
YBR043C	107.161	90.2921	193.01	180.318	0.918568	2.18419e-15	1.71794e-14	S000000247	YBR043C	QDR3	QuiniDine Resistance
YFL045C	290.622	374.915	158.125	158.608	-1.07107	2.22812e-15	1.75056e-14	S000001849	YFL045C	SEC53	SECretory
YER060W-A	14.4391	15.3992	37.3187	32.211	1.22127	2.2971e-15	1.80277e-14	S000002958	YER060W-A	FCY22	FluoroCYtosine resistance
YBR191W	375.842	512.682	193.231	201.398	-1.17081	2.42044e-15	1.89747e-14	S000000395	YBR191W	RPL21A	Ribosomal Protein of the Large subunit
YDL157C	101.074	94.4236	48.6028	57.0008	-0.889446	2.45328e-15	1.92111e-14	S000002316	YDL157C
YPR030W	212.765	190.275	392.879	377.295	0.934133	2.5432e-15	1.98933e-14	S000006234	YPR030W	CSR2	Chs5 Spa2 Rescue
YNR034W-A	8124.26	5520.59	2215.96	2783.41	-1.44855	2.56336e-15	2.00291e-14	S000007525	YNR034W-A	EGO4	Exit from rapamycin-induced GrOwth arrest
YHR013C	56.8363	60.9209	31.3447	28.5004	-0.975261	2.57101e-15	2.00668e-14	S000001055	YHR013C	ARD1	ARrest Defective
YFL021W	203.988	221.749	120.88	115.028	-0.851433	2.60938e-15	2.0344e-14	S000001873	YFL021W	GAT1
YJL127C	41.9725	35.5309	77.44	70.9747	0.936551	2.69733e-15	2.10067e-14	S000003663	YJL127C	SPT10	SuPpressor of Ty
YLR333C	202.218	273.055	105.245	114.16	-1.11503	2.83421e-15	2.20487e-14	S000004325	YLR333C	RPS25B	Ribosomal Protein of the Small subunit
YIL056W	62.2156	57.3152	106.351	107.923	0.841546	2.90139e-15	2.25467e-14	S000001318	YIL056W	VHR1	VHt1 Regulator
YJR091C	155.787	134.311	297.517	272.688	0.974758	2.93072e-15	2.27498e-14	S000003851	YJR091C	JSN1	Just Say No
YJL041W	133.42	146.255	257.469	266.688	0.906322	2.95055e-15	2.28788e-14	S000003577	YJL041W	NSP1	NucleoSkeletal-like Protein
YLR438C-A	74.1774	79.4	43.2189	42.3954	-0.842489	3.01916e-15	2.33854e-14	S000006434	YLR438C-A	LSM3	Like SM
YML036W	27.6042	30.7985	12.3166	12.4739	-1.23518	3.23605e-15	2.50381e-14	S000004500	YML036W	CGI121	homolog of human CGI-121
YAR035W	543.448	458.372	1284.4	994.436	1.18565	3.32501e-15	2.56985e-14	S000000080	YAR035W	YAT1
YHR117W	120.326	128.678	71.9823	69.8695	-0.811379	3.38864e-15	2.61619e-14	S000001159	YHR117W	TOM71	Translocase of the Outer Mitochondrial membrane
YER134C	51.1031	52.6579	26.6246	24.3161	-1.02523	3.41167e-15	2.63112e-14	S000000936	YER134C
YLR064W	112.115	118.987	60.6982	67.422	-0.851314	3.48312e-15	2.68332e-14	S000004054	YLR064W	PER33	Pore and ER protein
YGR285C	315.679	385.807	177.006	173.845	-0.999376	3.5012e-15	2.69434e-14	S000003517	YGR285C	ZUO1	ZUOtin
YCR061W	111.691	110.799	206.285	191.529	0.838413	3.54383e-15	2.7242e-14	S000000657	YCR061W
YDR340W	63.7727	53.7847	23.7483	29.132	-1.15408	3.55047e-15	2.72636e-14	S000002748	YDR340W
YGR181W	64.6221	71.2872	34.5161	37.5795	-0.914737	3.63455e-15	2.78793e-14	S000003413	YGR181W	TIM13	Translocase of the Inner Mitochondrial membrane
YFL007W	133.208	138.518	251.864	244.662	0.869786	3.68044e-15	2.82009e-14	S000001887	YFL007W	BLM10	BLeoMycin resistance
YAL064C-A	5.6624	4.58221	16.0043	14.2897	1.5607	3.76657e-15	2.88299e-14	S000002140	YAL064C-A	TDA8	Topoisomerase I Damage Affected
YPR104C	42.9634	43.9442	77.44	76.0274	0.820481	3.80222e-15	2.90715e-14	S000006308	YPR104C	FHL1	Fork Head-Like
YOR035C	142.834	127.325	248.177	259.741	0.910478	3.8468e-15	2.93669e-14	S000005561	YOR035C	SHE4	Swi5p-dependent HO Expression
YDR511W	230.318	250.519	112.767	134.37	-0.960468	3.8491e-15	2.93669e-14	S000002919	YDR511W	SDH7	Succinate DeHydrogenase
YNL084C	153.38	161.204	82.1601	93.4751	-0.841185	4.25761e-15	3.24267e-14	S000005028	YNL084C	END3	ENDocytosis defective
YIL093C	148.85	145.88	86.7328	83.5275	-0.791467	4.25925e-15	3.24267e-14	S000001355	YIL093C	RSM25	Ribosomal Small subunit of Mitochondria
YDR500C	397.359	446.127	227.969	200.924	-0.975509	4.33646e-15	3.29793e-14	S000002908	YDR500C	RPL37B	Ribosomal Protein of the Large subunit
YBR132C	167.961	140.396	307.105	298.031	0.972395	4.4813e-15	3.40445e-14	S000000336	YBR132C	AGP2	high-Affinity Glutamine Permease
YOR150W	225.222	240.303	127.739	129.16	-0.857561	4.51902e-15	3.42945e-14	S000005676	YOR150W	MRPL23	Mitochondrial Ribosomal Protein
YGL131C	55.633	50.1039	95.4355	91.975	0.825209	4.9204e-15	3.73008e-14	S000003099	YGL131C	SNT2
YKR095W-A	27.8165	29.6717	12.7592	12.0791	-1.2091	5.03095e-15	3.80984e-14	S000028512	YKR095W-A	PCC1	Polarized growth Chromatin-associated Controller
YKL159C	35.2484	37.1835	64.3121	72.6326	0.918509	5.27242e-15	3.98846e-14	S000001642	YKL159C	RCN1	Regulator of CalciNeurin
YNL045W	238.104	256.228	135.926	133.66	-0.874574	5.28839e-15	3.99629e-14	S000004990	YNL045W	LAP2	Leucine AminoPeptidases
YIL029C	57.1902	50.4795	23.0845	27.0004	-1.10542	5.47786e-15	4.13509e-14	S000001291	YIL029C
YJR034W	88.1918	80.8272	48.529	42.7901	-0.88756	5.50435e-15	4.15069e-14	S000003795	YJR034W	PET191	PETite colonies
YAL041W	76.3008	88.1888	43.8826	45.4744	-0.879953	5.7503e-15	4.33157e-14	S000000039	YAL041W	CDC24	Cell Division Cycle
YLR219W	175.393	157.673	323.994	302.136	0.91053	5.78905e-15	4.35615e-14	S000004209	YLR219W	MSC3	Meiotic Sister-Chromatid recombination
YPL013C	307.61	290.407	153.257	168.239	-0.895563	5.82473e-15	4.37837e-14	S000005934	YPL013C	MRPS16	Mitochondrial Ribosomal Protein
YMR008C	273.494	253.674	531.607	480.402	0.940853	6.10968e-15	4.58773e-14	S000004610	YMR008C	PLB1	PhosphoLipase B
YOL056W	22.8619	25.4651	10.1778	9.39488	-1.30158	6.13641e-15	4.60295e-14	S000005417	YOL056W	GPM3	Glycerate PhosphoMutase
YPR045C	152.177	141.523	85.8477	82.1065	-0.806176	6.28652e-15	4.71059e-14	S000006249	YPR045C	THP3	THO-related Protein
YCR028C-A	171.004	178.331	100.229	99.3962	-0.807151	6.47406e-15	4.84431e-14	S000007222	YCR028C-A	RIM1	Replication In Mitochondria
YGR135W	269.53	319.027	151.93	151.265	-0.956758	6.47857e-15	4.84431e-14	S000003367	YGR135W	PRE9	PRoteinase yscE
YBL027W	853.96	1114	455.642	456.007	-1.11009	6.76945e-15	5.05651e-14	S000000123	YBL027W	RPL19B	Ribosomal Protein of the Large subunit
YBR122C	213.614	217.993	120.29	124.976	-0.815406	6.92798e-15	5.1695e-14	S000000326	YBR122C	MRPL36	Mitochondrial Ribosomal Protein
YNR006W	117.282	108.546	205.105	197.529	0.834067	6.97639e-15	5.20019e-14	S000005289	YNR006W	VPS27	Vacuolar Protein Sorting
YDL205C	158.689	171.42	86.2165	97.6593	-0.844445	7.51671e-15	5.59708e-14	S000002364	YDL205C	HEM3	HEMe biosynthesis
YFL046W	97.8887	93.8978	53.8392	56.685	-0.795505	7.68244e-15	5.71452e-14	S000001848	YFL046W	FMP32	Found in Mitochondrial Proteome
YPR147C	84.582	82.4047	46.464	48.7112	-0.811385	7.91853e-15	5.88399e-14	S000006351	YPR147C
YBR253W	45.4407	51.2306	23.8958	21.3161	-1.09472	9.01508e-15	6.69182e-14	S000000457	YBR253W	SRB6	Suppressor of RNA polymerase B
YEL059C-A	48.4135	51.9818	25.2233	24.3951	-1.01589	9.1431e-15	6.77979e-14	S000002954	YEL059C-A	SOM1	SOrting Mitochondrial
YMR135W-A	10.617	10.7419	25.7396	24.3951	1.23076	9.34085e-15	6.91922e-14	S000004743	YMR135W-A
YER019C-A	218.144	208.153	124.494	115.975	-0.825822	9.49645e-15	7.02717e-14	S000002127	YER019C-A	SBH2	Sec61 beta homolog 2
YNL279W	21.3048	21.7092	43.3664	44.3691	1.02806	9.72194e-15	7.18657e-14	S000005223	YNL279W	PRM1	Pheromone-Regulated Membrane protein
YDL045W-A	117.849	112.828	59.8132	68.2905	-0.849214	9.84085e-15	7.26693e-14	S000006430	YDL045W-A	MRP10	Mitochondrial Ribosomal Protein
YEL039C	562.771	593.209	229.739	304.978	-1.11243	1.05638e-14	7.79269e-14	S000000765	YEL039C	CYC7	CYtochrome C
YDR427W	194.786	205.448	102.442	117.002	-0.867237	1.12184e-14	8.26704e-14	S000002835	YDR427W	RPN9	Regulatory Particle Non-ATPase
YLR004C	29.9399	28.0191	57.3056	55.185	0.956208	1.15746e-14	8.52071e-14	S000003994	YLR004C	THI73	THI regulon
YMR053C	49.8291	46.9489	82.3814	88.0276	0.815504	1.16035e-14	8.53319e-14	S000004657	YMR053C	STB2	Sin Three Binding protein
YPL218W	269.672	305.656	148.537	154.976	-0.922557	1.27438e-14	9.3621e-14	S000006139	YPL218W	SAR1	Secretion-Associated
YGL209W	62.711	53.4842	115.054	103.423	0.910488	1.3157e-14	9.65566e-14	S000003177	YGL209W	MIG2	Multicopy Inhibitor of GAL gene expression
YMR324C	0.49546	0.901419	4.72015	4.26322	2.68131	1.33476e-14	9.78548e-14	S000004943	YMR324C
YOR127W	88.5457	90.2921	151.192	155.923	0.780055	1.386e-14	1.01507e-13	S000005653	YOR127W	RGA1	Rho GTPase Activating Protein
YGR076C	99.0919	102.987	57.4531	58.0272	-0.807112	1.40122e-14	1.02516e-13	S000003308	YGR076C	MRPL25	Mitochondrial Ribosomal Protein
YPL142C	23.2866	25.2397	10.6203	9.39488	-1.27494	1.40499e-14	1.02687e-13	S000006063	YPL142C
YKR050W	106.878	99.2312	198.689	175.108	0.858822	1.42018e-14	1.03691e-13	S000001758	YKR050W	TRK2	TRansport of potassium (K)
YEL066W	78.9904	74.1417	44.4727	37.1058	-0.907414	1.48999e-14	1.08676e-13	S000000792	YEL066W	HPA3	Histone and other Protein Acetyltransferase
YMR122W-A	1307.23	1650.35	710.751	701.458	-1.06642	1.52958e-14	1.1145e-13	S000007524	YMR122W-A		Novel Cell Wall protein
YBR053C	242.209	255.552	141.457	131.37	-0.8672	1.54646e-14	1.12564e-13	S000000257	YBR053C
YJL116C	49.546	47.0991	94.403	81.6328	0.865254	1.55385e-14	1.12987e-13	S000003652	YJL116C	NCA3	Nuclear Control of ATPase
YER040W	56.4824	57.165	97.7219	97.7383	0.782273	1.58517e-14	1.15147e-13	S000000842	YER040W	GLN3	GLutamiNe metabolism
YGL194C	44.7329	43.4935	22.1257	21.474	-1.01644	1.67658e-14	1.21663e-13	S000003162	YGL194C	HOS2	Hda One Similar
YNL023C	55.633	54.611	95.8781	92.9224	0.776092	1.72879e-14	1.25324e-13	S000004968	YNL023C	FAP1	FKBP12-Associated Protein
YLR377C	951.353	883.616	501.073	447.796	-0.951417	1.73946e-14	1.25969e-13	S000004369	YLR377C	FBP1	Fructose-1
YER152W-A	11.8203	12.0189	3.90887	4.10532	-1.57116	1.85914e-14	1.345e-13	S000028761	YER152W-A
YDR508C	175.393	172.922	326.575	305.768	0.860326	1.90242e-14	1.37491e-13	S000002916	YDR508C	GNP1	GlutamiNe Permease
YHR154W	77.3625	79.7005	132.385	135.949	0.772659	1.96484e-14	1.41859e-13	S000001197	YHR154W	RTT107	Regulator of Ty1 Transposition
YKL218C	85.4314	81.8038	150.602	139.265	0.793498	2.00381e-14	1.44526e-13	S000001701	YKL218C	SRY1	Serine Racemase of Yeast
YDR417C	99.2335	138.218	53.913	55.8956	-1.11218	2.1534e-14	1.55158e-13	S000002825	YDR417C
YOL077C	55.7038	71.7379	28.3209	30.9478	-1.10411	2.35508e-14	1.69518e-13	S000005437	YOL077C	BRX1	Xenopus laevis Brix (Biogenesis of Ribosomes in Xenopus) homolog
YHR196W	54.5713	57.3152	28.8372	29.6846	-0.934798	2.43147e-14	1.74735e-13	S000001239	YHR196W	UTP9	U Three Protein
YNL017C	0.3539	0.450709	3.54011	3.63163	3.131	2.43245e-14	1.74735e-13	S000004962	YNL017C
YOL041C	80.3352	91.6443	36.8024	47.7639	-1.02489	2.48358e-14	1.78228e-13	S000005401	YOL041C	NOP12	NucleOlar Protein
YJR082C	77.0794	75.9445	40.7113	45.3954	-0.830254	2.49691e-14	1.79004e-13	S000003842	YJR082C	EAF6	Esa1p-Associated Factor
YBR120C	129.669	133.41	68.6634	79.4222	-0.829544	2.62604e-14	1.88072e-13	S000000324	YBR120C	CBP6	Cytochrome B Protein synthesis
YLR130C	95.199	93.9729	165.574	156.555	0.767977	2.66557e-14	1.90711e-13	S000004120	YLR130C	ZRT2	Zinc-Regulated Transporter
YLR036C	94.9867	83.0057	42.4076	51.0008	-0.931381	2.6911e-14	1.92345e-13	S000004026	YLR036C
YPL146C	99.0919	106.968	54.6505	60.3956	-0.84107	2.77714e-14	1.98296e-13	S000006067	YPL146C	NOP53	NucleOlar Protein
YML009C	82.4586	92.6959	48.3078	50.2113	-0.829887	2.79109e-14	1.99092e-13	S000004468	YML009C	MRPL39	Mitochondrial Ribosomal Protein
YGR161W-C	55.5623	59.0429	97.2794	107.765	0.839094	2.85244e-14	2.03265e-13	S000029726	YGR161W-C
YPL140C	83.0249	88.2639	144.923	147.792	0.773167	2.86093e-14	2.03666e-13	S000006061	YPL140C	MKK2	Mitogen-activated Kinase Kinase
YHR059W	86.2808	98.5551	45.5052	53.2903	-0.904087	2.88718e-14	2.05329e-13	S000001101	YHR059W	FYV4	Function required for Yeast Viability
YGR082W	134.836	147.758	77.6612	83.6065	-0.809308	3.02498e-14	2.14915e-13	S000003314	YGR082W	TOM20	Translocase of the Outer Mitochondrial membrane
YBL038W	182.895	184.115	107.605	105.949	-0.781106	3.08285e-14	2.18809e-13	S000000134	YBL038W	MRPL16	Mitochondrial Ribosomal Protein
YOL083W	92.9341	91.7945	168.303	151.581	0.792284	3.10053e-14	2.19845e-13	S000005443	YOL083W	ATG34	AuTophaGy related
YCR020C-A	83.1664	61.8974	28.2472	35.1321	-1.19598	3.2106e-14	2.27423e-13	S000000614	YCR020C-A	MAK31	MAintenance of Killer
YDR045C	51.457	49.9536	25.0758	26.4478	-0.977222	3.37054e-14	2.38515e-13	S000002452	YDR045C	RPC11	RNA Polymerase C
YKL024C	79.2735	89.7663	44.8414	48.6323	-0.854701	3.59725e-14	2.54305e-13	S000001507	YKL024C	URA6	URAcil requiring
YDL077C	35.1069	40.9394	69.696	70.1063	0.879167	3.61842e-14	2.55548e-13	S000002235	YDL077C	VAM6	VAcuolar Morphogenesis
YAL003W	457.309	636.477	251.127	239.925	-1.15524	3.84727e-14	2.71442e-13	S000000003	YAL003W	EFB1	Elongation Factor Beta
YKL066W	73.3988	65.9538	32.451	39.2374	-0.960275	3.9517e-14	2.78534e-13	S000001549	YKL066W
YER106W	2.97276	2.70426	9.58781	9.15803	1.71911	3.99727e-14	2.81468e-13	S000000908	YER106W	MAM1	Monopolar microtubule Attachment during Meiosis I
YHR038W	64.0559	71.4375	32.0823	37.9742	-0.95219	4.1723e-14	2.93503e-13	S000001080	YHR038W	RRF1	Ribosome Recycling Factor
YDL226C	85.8561	111.4	51.8479	45.948	-1.01107	4.1957e-14	2.94858e-13	S000002385	YDL226C	GCS1	Growth Cold Sensitive
YOR217W	54.2882	54.3856	94.698	90.3171	0.76775	4.34679e-14	3.05175e-13	S000005743	YOR217W	RFC1	Replication Factor C
YGR106C	222.32	206.124	126.559	112.502	-0.841473	4.56603e-14	3.20251e-13	S000003338	YGR106C	VOA1	V0 Assembly protein
YLR074C	75.4514	77.522	42.2601	45.4744	-0.802361	4.65205e-14	3.25964e-13	S000004064	YLR074C	BUD20	BUD site selection
YDR079W	144.037	134.462	64.1645	81.6328	-0.934543	4.70466e-14	3.29326e-13	S000002486	YDR079W	PET100	PETite colonies
YKL065C	672.197	683.125	336.679	379.742	-0.91982	4.82246e-14	3.37241e-13	S000001548	YKL065C	YET1	Yeast Endoplasmic reticulum Transmembrane protein
YPL010W	189.478	186.594	89.3879	111.081	-0.90816	4.83039e-14	3.37464e-13	S000005931	YPL010W	RET3	RETrieval from ER
YIL015W	31.0724	27.6435	56.9368	56.1324	0.944462	4.87714e-14	3.40396e-13	S000001277	YIL015W	BAR1	BARrier to the alpha factor response
YDR216W	339.248	294.689	593.338	616.193	0.931904	4.90693e-14	3.42141e-13	S000002624	YDR216W	ADR1	Alcohol Dehydrogenase II synthesis Regulator
YMR280C	190.964	173.899	332.033	329.847	0.85906	4.95476e-14	3.45138e-13	S000004893	YMR280C	CAT8	CATabolite repression
YHR068W	106.524	140.02	61.5095	61.6588	-1.00069	4.96057e-14	3.45205e-13	S000001110	YHR068W	DYS1	DeoxyhYpusine Synthase
YOL164W	52.3064	55.0617	100.451	88.896	0.819057	4.97917e-14	3.46162e-13	S000005524	YOL164W	BDS1	Bacterially Derived Sulfatase
YDL130W-A	839.309	793.699	433.885	446.533	-0.891292	4.98546e-14	3.46261e-13	S000007232	YDL130W-A	STF1	STabilizing Factor
YBR162W-A	68.9397	70.6863	37.1712	41.369	-0.830619	5.04632e-14	3.50147e-13	S000002158	YBR162W-A	YSY6
YDR059C	110.7	109.522	185.782	192.398	0.779963	5.06464e-14	3.51076e-13	S000002466	YDR059C	UBC5	UBiquitin-Conjugating
YER024W	1001.68	831.859	1934.45	1776.42	1.01709	5.1196e-14	3.54541e-13	S000000826	YER024W	YAT2
YBL040C	162.44	161.129	81.3488	98.0541	-0.851433	5.26791e-14	3.64457e-13	S000000136	YBL040C	ERD2	Endoplasmic reticulum Retention Defective
YPR158W	99.3043	109.372	56.3468	60.8693	-0.832136	5.29565e-14	3.65901e-13	S000006362	YPR158W	CUR1	Curing of [URe3]
YML094W	23.8528	26.8923	10.5466	11.0528	-1.23143	5.29905e-14	3.65901e-13	S000004559	YML094W	GIM5	Gene Involved in Microtubule biogenesis
YNL237W	133.349	110.799	233.352	220.819	0.895149	5.33224e-14	3.67837e-13	S000005181	YNL237W	YTP1	Yeast putative Transmembrane Protein
YML079W	177.445	191.326	103.622	108.396	-0.798505	5.44964e-14	3.75572e-13	S000004544	YML079W
YLR360W	122.237	113.429	63.5745	70.1852	-0.817661	5.58662e-14	3.8464e-13	S000004352	YLR360W	VPS38	Vacuolar Protein Sorting
YLR407W	42.1849	40.4136	70.3597	73.5011	0.799846	5.60648e-14	3.85635e-13	S000004399	YLR407W
YPL178W	119.477	129.429	70.286	74.0537	-0.786097	5.73668e-14	3.9421e-13	S000006099	YPL178W	CBC2	Cap Binding Complex
YLR079W	413.921	421.789	235.491	225.872	-0.857008	5.74932e-14	3.94698e-13	S000004069	YLR079W	SIC1	Substrate/Subunit Inhibitor of Cyclin-dependent protein kinase
YBR067C	690.105	598.768	1477.41	1204.68	1.05723	5.8627e-14	4.02094e-13	S000000271	YBR067C	TIP1	Temperature shock-Inducible Protein
YBR106W	416.54	441.019	243.014	213.082	-0.910688	6.0539e-14	4.14808e-13	S000000310	YBR106W	PHO88	PHOsphate metabolism
YNL242W	79.9813	76.846	130.247	135.949	0.76296	6.11685e-14	4.18719e-13	S000005186	YNL242W	ATG2	AuTophaGy related
YKL081W	299.895	411.423	171.032	157.502	-1.11418	6.18828e-14	4.23202e-13	S000001564	YKL081W	TEF4	Translation Elongation Factor
YNL038W	93.9958	74.968	37.7612	45.7112	-1.0186	6.2769e-14	4.28851e-13	S000004983	YNL038W	GPI15	GlycosylPhosphatidylInositol anchor biosynthesis
YGR287C	16.7041	14.8734	33.5573	42.6322	1.26847	6.30973e-14	4.30681e-13	S000003519	YGR287C	IMA1	IsoMAltase
YGR232W	160.175	163.307	93.518	98.5278	-0.752343	6.33539e-14	4.31904e-13	S000003464	YGR232W	NAS6	Non-ATPase Subunit 6
YLR241W	126.555	113.579	212.554	209.214	0.812345	6.33976e-14	4.31904e-13	S000004231	YLR241W	CSC1	Calcium permeable Stress-gated cation Channel
YDL037C	5.52084	5.85922	21.0194	14.9213	1.65992	6.46928e-14	4.40306e-13	S000002195	YDL037C	BSC1	Bypass of Stop Codon
YPR114W	124.431	124.321	75.6699	70.3431	-0.768181	6.49181e-14	4.41419e-13	S000006318	YPR114W
YML078W	364.8	364.699	200.533	206.45	-0.841952	6.72209e-14	4.56641e-13	S000004543	YML078W	CPR3	Cyclosporin A-sensitive Proline Rotamase
YOL030W	313.98	313.769	600.565	555.64	0.881157	6.84893e-14	4.64814e-13	S000005390	YOL030W	GAS5	Glycophospholipid-Anchored Surface protein
YJR089W	44.9453	45.1461	79.505	75.6327	0.784234	7.19447e-14	4.878e-13	S000003849	YJR089W	BIR1	Baculoviral IAP Repeat-containing protein
YLR177W	147.718	160.377	287.56	274.82	0.868307	7.41171e-14	5.02052e-13	S000004167	YLR177W
YDL084W	331.109	363.046	194.042	188.134	-0.860872	7.60714e-14	5.14607e-13	S000002242	YDL084W	SUB2	SUppressor of Brr1-1
YKL119C	40.2738	42.7423	17.9218	21.1582	-1.08777	7.6115e-14	5.14607e-13	S000001602	YKL119C	VPH2	Vacuolar pH
YGR237C	121.317	107.945	201.27	203.924	0.821275	7.6256e-14	5.15071e-13	S000003469	YGR237C
YOR348C	568.08	455.141	1312.13	1005.25	1.17934	7.76613e-14	5.24067e-13	S000005875	YOR348C	PUT4	Proline UTilization
YBL113C	20.8801	20.2068	45.579	40.0269	1.0591	7.90461e-14	5.32907e-13	S000002153	YBL113C
YOR309C	11.0417	19.9063	2.36008	3.47374	-2.4062	7.91906e-14	5.33377e-13	S000005836	YOR309C
YCL050C	159.75	198.838	96.9106	93.3172	-0.914158	7.95559e-14	5.35331e-13	S000000555	YCL050C	APA1	AP4A phosphorylase
YAR073W	1.69872	0.976537	5.67893	6.86852	2.21048	8.19307e-14	5.50791e-13	S000000095	YAR073W	IMD1	IMP Dehydrogenase
YDR436W	142.622	130.706	276.424	238.03	0.912383	8.43933e-14	5.66811e-13	S000002844	YDR436W	PPZ2	Protein Phosphatase Z
YLL016W	85.6437	84.3578	141.605	144.318	0.749903	8.47026e-14	5.68353e-13	S000003939	YLL016W	SDC25	Suppressor of cdc25
YML028W	1846.86	1999.05	1044.41	981.567	-0.924678	8.88496e-14	5.95618e-13	S000004490	YML028W	TSA1	Thiol-Specific Antioxidant
YDL054C	107.373	86.4611	177.596	184.582	0.901261	9.08215e-14	6.08265e-13	S000002212	YDL054C	MCH1	MonoCarboxylate transporter Homologue
YIL150C	14.156	12.6199	29.2797	29.6057	1.1353	9.12655e-14	6.10665e-13	S000001412	YIL150C	MCM10	MiniChromosome Maintenance
YDR299W	53.3681	53.4091	26.0346	29.0531	-0.955436	9.18639e-14	6.14092e-13	S000002707	YDR299W	BFR2	BreFeldin A Resistance
YDR381W	314.405	344.943	175.236	187.187	-0.863368	9.33936e-14	6.23733e-13	S000002789	YDR381W	YRA1	Yeast RNA Annealing protein
YKL129C	107.869	109.673	180.62	193.661	0.782686	9.5193e-14	6.35155e-13	S000001612	YKL129C	MYO3	MYOsin
YDR018C	87.2009	77.5971	138.064	156.476	0.837067	9.57939e-14	6.38566e-13	S000002425	YDR018C
YKL090W	87.3425	82.2545	47.4228	50.8429	-0.78792	9.67903e-14	6.44606e-13	S000001573	YKL090W	CUE2	Coupling of Ubiquitin conjugation to ER degradation
YDL085C-A	21.3755	24.7139	8.48152	9.94752	-1.32263	9.79197e-14	6.51518e-13	S000007588	YDL085C-A
YEL054C	129.881	172.922	78.3988	71.8432	-1.01042	1.01509e-13	6.74773e-13	S000000780	YEL054C	RPL12A	Ribosomal Protein of the Large subunit
YER050C	250.915	234.294	127.592	141.002	-0.853426	1.01902e-13	6.76748e-13	S000000852	YER050C	RSM18	Ribosomal Small subunit of Mitochondria
YLR326W	82.6002	76.0948	137.474	133.028	0.769103	1.02112e-13	6.77511e-13	S000004318	YLR326W
YER162C	116.504	103.363	193.231	193.108	0.812897	1.02539e-13	6.79712e-13	S000000964	YER162C	RAD4	RADiation sensitive
YFR006W	165.908	175.702	305.704	301.268	0.829347	1.03176e-13	6.83299e-13	S000001902	YFR006W
YDL179W	110.134	107.644	65.8609	57.9482	-0.814068	1.08085e-13	7.15151e-13	S000002338	YDL179W	PCL9	Pho85 CycLin
YNL281W	212.906	260.66	129.435	111.87	-0.972212	1.14438e-13	7.56476e-13	S000005225	YNL281W	HCH1	High-Copy Hsp90 suppressor
YOL040C	580.113	744.873	332.181	312.084	-1.04013	1.14544e-13	7.56476e-13	S000005400	YOL040C	RPS15	Ribosomal Protein of the Small subunit
YGL242C	40.2738	49.9536	21.2407	18.8687	-1.1677	1.15963e-13	7.64836e-13	S000003211	YGL242C
YDR031W	555.906	392.718	165.427	219.003	-1.30334	1.16024e-13	7.64836e-13	S000002438	YDR031W	MIX14	Mitochondrial Intermembrane space CX(n)C motif protein
YGL151W	96.7562	98.5551	55.978	58.9746	-0.764894	1.18415e-13	7.79873e-13	S000003119	YGL151W	NUT1	Negative regulation of URS Two
YOR371C	45.9362	37.8596	79.8738	75.0801	0.885979	1.19349e-13	7.85303e-13	S000005898	YOR371C	GPB1
YML076C	89.3951	79.3249	146.103	144.555	0.784252	1.22039e-13	8.02258e-13	S000004541	YML076C	WAR1	Weak Acid Resistance
YER055C	216.799	263.064	124.346	129.791	-0.91687	1.25518e-13	8.2437e-13	S000000857	YER055C	HIS1	HIStidine
YBR187W	89.2535	90.2921	54.6505	50.685	-0.768726	1.26092e-13	8.27375e-13	S000000391	YBR187W	GDT1	Gcr1 Dependent Translation factor
YGL197W	143.754	145.955	255.257	257.056	0.822401	1.26474e-13	8.29122e-13	S000003165	YGL197W	MDS3	Mck1 Dosage Suppressor
YLR169W	32.7003	29.6717	14.898	12.8686	-1.16602	1.28374e-13	8.40804e-13	S000004159	YLR169W
YDR359C	50.183	54.7612	91.1579	88.5803	0.776756	1.30345e-13	8.52929e-13	S000002767	YDR359C	EAF1	Esa1p-Associated Factor
YLR359W	302.089	389.338	176.563	167.608	-1.00622	1.32402e-13	8.65595e-13	S000004351	YLR359W	ADE13	ADEnine requiring
YDR025W	448.674	614.617	252.454	241.346	-1.10639	1.34524e-13	8.78657e-13	S000002432	YDR025W	RPS11A	Ribosomal Protein of the Small subunit
YBR022W	59.3136	59.2683	31.4923	33.3952	-0.87016	1.3797e-13	9.00344e-13	S000000226	YBR022W	POA1	Phosphatase Of ADP-ribose 1"-phosphate
YHR126C	0.49546	0.826301	3.68762	4.97376	2.70049	1.40958e-13	9.19003e-13	S000001168	YHR126C	ANS1
YNL085W	141.772	153.091	84.2252	88.7382	-0.769562	1.41733e-13	9.22599e-13	S000005029	YNL085W	MKT1	Maintenance of K2 Killer Toxin
YJR063W	18.4736	21.7843	8.33402	7.42116	-1.35	1.41769e-13	9.22599e-13	S000003824	YJR063W	RPA12	RNA Polymerase A
YMR038C	131.438	143.551	80.2426	81.0012	-0.769903	1.42829e-13	9.27819e-13	S000004641	YMR038C	CCS1	Copper Chaperone for SOD1
YOR313C	8.06891	6.91088	18.0693	19.1845	1.31104	1.42831e-13	9.27819e-13	S000005840	YOR313C	SPS4	SPorulation Specific trancript
YJL034W	834.991	808.498	1489.72	1545.42	0.884979	1.4407e-13	9.35014e-13	S000003571	YJL034W	KAR2	KARyogamy
YGL070C	70.1429	73.1652	42.7764	36.0795	-0.860373	1.45258e-13	9.41861e-13	S000003038	YGL070C	RPB9	RNA Polymerase B
YPL066W	121.105	135.814	75.9649	72.3169	-0.792411	1.47046e-13	9.52591e-13	S000005987	YPL066W	RGL1	Rho1 GEF Localizing
YKL165C	67.3825	67.3811	110.555	132.397	0.849694	1.53484e-13	9.93393e-13	S000001648	YKL165C	MCD4	Morphogenesis Checkpoint Dependent
YNL280C	102.419	94.2734	175.014	161.45	0.774389	1.54217e-13	9.9723e-13	S000005224	YNL280C	ERG24	ERGosterol biosynthesis
YEL053W-A	94.7744	143.1	51.9954	51.0797	-1.20587	1.61432e-13	1.04261e-12	S000028744	YEL053W-A
YLR200W	96.2607	98.3298	50.2254	59.6851	-0.824877	1.61528e-13	1.04261e-12	S000004190	YLR200W	YKE2	Yeast ortholog of mouse KE2
YBL100W-B	2.4773	3.68079	9.80906	10.3423	1.71247	1.64924e-13	1.06357e-12	S000002149	YBL100W-B
YIL020C-A	18.8275	19.2303	7.52274	8.21065	-1.2744	1.73644e-13	1.11879e-12	S000028787	YIL020C-A
YOR357C	79.2028	91.4189	48.8978	47.2112	-0.827261	1.78492e-13	1.14899e-12	S000005884	YOR357C	SNX3	Sorting NeXin
YOR194C	296.851	289.731	169.852	163.502	-0.815194	1.84072e-13	1.1836e-12	S000005720	YOR194C	TOA1
YBR019C	20.9509	20.8078	44.1777	40.1848	1.01466	1.84201e-13	1.1836e-12	S000000223	YBR019C	GAL10	GALactose metabolism
YLR138W	167.89	145.204	296.853	281.373	0.884843	1.91478e-13	1.22925e-12	S000004128	YLR138W	NHA1	Na+/H+ Antiporter
YJL045W	222.886	186.143	442.588	372.795	0.995176	1.97784e-13	1.26859e-12	S000003581	YJL045W
YLR204W	241.855	252.773	132.975	144.555	-0.83379	1.98067e-13	1.26926e-12	S000004194	YLR204W	QRI5
YIL170W	8.42281	7.73718	21.6094	18.5529	1.31262	2.03055e-13	1.30006e-12	S000001432	YIL170W	HXT12	HeXose Transporter
YHR040W	45.1576	43.7188	77.44	74.2906	0.771516	2.07291e-13	1.32599e-12	S000001082	YHR040W	BCD1	Box C/D snoRNA accumulation
YPL189C-A	188.062	174.124	100.377	108.949	-0.791308	2.11391e-13	1.35101e-12	S000028527	YPL189C-A	COA2	Cytochrome Oxidase Assembly
YML117W	322.261	308.811	563.763	574.587	0.851006	2.13468e-13	1.36306e-12	S000004585	YML117W	NAB6	Nucleic Acid Binding protein
YJR122W	123.582	115.006	202.819	209.372	0.788523	2.29553e-13	1.46446e-12	S000003883	YJR122W	IBA57	Iron-sulfur cluster assembly factor for Biotin synthase and Aconitase-like mitochondrial proteins
YCR106W	21.234	23.8876	44.4727	45.3954	0.994441	2.35564e-13	1.50146e-12	S000000703	YCR106W	RDS1	Regulator of Drug Sensitivity
YPR170C	77.3625	80.6019	46.0952	47.4481	-0.755817	2.47006e-13	1.57298e-12	S000006374	YPR170C
YIR028W	35.1776	31.5497	59.2231	66.7115	0.914987	2.47465e-13	1.5745e-12	S000001467	YIR028W	DAL4	Degradation of Allantoin
YOR179C	61.7909	61.9726	34.5161	34.9742	-0.832624	2.58082e-13	1.64059e-12	S000005705	YOR179C	SYC1	Similar to Ysh1 C-terminal
YPR170W-B	68.5858	66.4796	38.6462	38.9216	-0.800171	2.62277e-13	1.66576e-12	S000028515	YPR170W-B
YPR053C	65.4715	77.7474	40.0475	37.8163	-0.878087	2.63844e-13	1.67422e-12	S000006257	YPR053C
YIL024C	51.9525	44.0193	85.7002	84.1591	0.822766	2.76896e-13	1.75548e-12	S000001286	YIL024C
YJL037W	15.0761	12.695	29.7222	35.8426	1.23663	2.84391e-13	1.80139e-12	S000003574	YJL037W	IRC18	Increased Recombination Centers
YJR094W-A	379.876	414.352	225.903	213.24	-0.854706	2.89572e-13	1.83259e-12	S000003855	YJR094W-A	RPL43B	Ribosomal Protein of the Large subunit
YDR519W	112.115	117.109	63.9433	70.1063	-0.774253	2.90217e-13	1.83504e-12	S000002927	YDR519W	FPR2	FKBP Proline Rotamase
YDR524W-C	207.81	227.158	109.227	129.791	-0.864031	2.98847e-13	1.88793e-12	S000028740	YDR524W-C
YLR274W	56.9779	58.1415	94.403	97.0277	0.733591	3.08242e-13	1.94555e-12	S000004264	YLR274W	MCM5	MiniChromosome Maintenance
YLR370C	296.214	301.074	170.589	171.634	-0.803452	3.13318e-13	1.97585e-12	S000004362	YLR370C	ARC18	ARp2/3 Complex subunit
YPR160W	1546.97	1661.01	870.13	871.039	-0.881592	3.38741e-13	2.13428e-12	S000006364	YPR160W	GPH1	Glycogen PHosphorylase
YNR047W	88.121	79.4751	139.834	145.028	0.764766	3.41327e-13	2.14867e-12	S000005330	YNR047W	FPK1	FliPase Kinase 1
YFL026W	98.4549	113.353	60.0344	59.764	-0.821673	3.43974e-13	2.16343e-12	S000001868	YFL026W	STE2	STErile
YNL011C	59.172	68.583	32.2298	35.4479	-0.916574	3.47409e-13	2.1831e-12	S000004956	YNL011C
YJR085C	540.051	502.541	291.986	287.531	-0.847252	3.68819e-13	2.3156e-12	S000003845	YJR085C
YPL126W	70.8507	78.3483	44.3252	40.1848	-0.818875	3.86596e-13	2.42507e-12	S000006047	YPL126W	NAN1	Net1 Associated Nuclear protein
YDL114W	1.62794	1.95307	6.49021	7.10537	1.92112	3.88812e-13	2.43683e-12	S000002272	YDL114W
YDR047W	166.262	182.462	104.138	98.8436	-0.780356	4.08536e-13	2.5582e-12	S000002454	YDR047W	HEM12	HEMe biosynthesis
YNL231C	146.373	149.861	90.0516	88.7382	-0.728298	4.24084e-13	2.65322e-12	S000005175	YNL231C	PDR16	Pleiotropic Drug Resistance
snR33	33.2666	22.1599	8.40777	9.71067	-1.61435	4.29705e-13	2.68603e-12	S000007298	snR33	SNR33	Small Nucleolar RNA
YDR420W	138.375	130.18	250.61	225.872	0.827184	4.31698e-13	2.69561e-12	S000002828	YDR420W	HKR1	Hansenula mrakii Killer toxin Resistant
YPL234C	251.977	248.491	144.776	142.265	-0.801957	4.31994e-13	2.69561e-12	S000006155	YPL234C	VMA11	Vacuolar Membrane Atpase
YKL124W	74.8144	65.7285	119.921	121.107	0.777581	4.34664e-13	2.7099e-12	S000001607	YKL124W	SSH4	Suppressor of SHr3 deletion
YEL047C	143.046	165.11	86.2165	90.3961	-0.802918	4.37374e-13	2.72441e-12	S000000773	YEL047C	FRD1	Fumarate ReDuctase
YEL023C	25.5516	28.9956	55.2405	51.0797	0.963749	4.60444e-13	2.86561e-12	S000000749	YEL023C
YLR051C	93.288	88.4893	51.9954	55.8956	-0.753138	4.65845e-13	2.89669e-12	S000004041	YLR051C	FCF2	Faf1p Copurifying Factor
YPL200W	23.8528	21.2585	43.0714	52.4218	1.08011	4.70258e-13	2.92158e-12	S000006121	YPL200W	CSM4	Chromosome Segregation in Meiosis
YKL185W	351.706	370.633	211.374	190.108	-0.847125	4.88775e-13	3.03398e-12	S000001668	YKL185W	ASH1	Asymmetric Synthesis of HO
YGL029W	54.4298	49.7283	24.4858	28.1057	-0.986976	4.90278e-13	3.04044e-12	S000002997	YGL029W	CGR1	Coiled-coil Growth-Regulated
YGR254W	1433.79	1439.12	3026.35	2543.96	0.955258	4.90669e-13	3.04044e-12	S000003486	YGR254W	ENO1	ENOlase
YKR104W	9.69685	11.4931	23.3795	27.3951	1.26058	4.98928e-13	3.08893e-12	S000001812	YKR104W
YMR135C	440.605	363.723	824.699	747.879	0.9672	5.12037e-13	3.16734e-12	S000004742	YMR135C	GID8	Glucose Induced Degradation deficient
YER126C	75.6638	85.9353	45.5052	47.4481	-0.797541	5.20756e-13	3.21848e-12	S000000928	YER126C	NSA2	Nop Seven Associated
YAL024C	20.597	20.6575	39.2363	44.2112	1.01539	5.33259e-13	3.2929e-12	S000000022	YAL024C	LTE1	Low Temperature Essential
YBR220C	40.4154	41.6155	80.3163	67.7378	0.852576	5.45287e-13	3.36426e-12	S000000424	YBR220C
YGL087C	118.698	117.26	67.7047	73.1853	-0.744303	5.51149e-13	3.39748e-12	S000003055	YGL087C	MMS2	Methyl MethaneSulfonate sensitivity
YCR028C	62.9942	53.1086	109.744	100.107	0.853451	5.55124e-13	3.41903e-12	S000000623	YCR028C	FEN2	FENpropimorph resistance
YMR140W	89.8198	85.7099	145.44	145.265	0.727617	5.61951e-13	3.45808e-12	S000004748	YMR140W	SIP5	Snf1 Interacting Protein
YNR060W	30.5062	30.9487	54.4292	58.7377	0.880368	5.76459e-13	3.54431e-12	S000005343	YNR060W	FRE4	Ferric REductase
YGR079W	24.4191	32.8267	63.3533	57.2377	1.07639	5.78594e-13	3.55436e-12	S000003311	YGR079W
YGL105W	270.663	339.384	158.273	160.739	-0.935145	5.80534e-13	3.56321e-12	S000003073	YGL105W	ARC1	Aminoacyl-tRNA synthetase Cofactor
YNL335W	1.27404	0.976537	5.01516	5.3685	2.19094	5.86083e-13	3.59417e-12	S000005279	YNL335W	DDI3	DNA Damage Inducible
YJR073C	600.78	512.081	1178.86	1012.12	0.977268	5.94351e-13	3.64174e-12	S000003834	YJR073C	OPI3	OverProducer of Inositol
YLR415C	0.3539	0.375591	3.46636	2.9211	3.10195	6.31764e-13	3.86766e-12	S000004407	YLR415C
YGR062C	67.7364	71.9633	40.4163	41.369	-0.772194	6.37044e-13	3.89618e-12	S000003294	YGR062C	COX18	Cytochrome c OXidase
YJL091C	53.3681	51.3809	86.659	87.9487	0.736799	6.37516e-13	3.89618e-12	S000003627	YJL091C	GWT1	GPI-anchored Wall protein Transfer
YDR349C	148.355	145.354	274.875	247.662	0.831192	6.42233e-13	3.92164e-12	S000002757	YDR349C	YPS7	YaPSin
YLR447C	362.606	395.047	210.12	215.372	-0.832354	6.55062e-13	3.99655e-12	S000004439	YLR447C	VMA6	Vacuolar Membrane Atpase
YDL141W	46.8563	48.2259	85.4052	77.8433	0.780259	6.66816e-13	4.06478e-12	S000002300	YDL141W	BPL1	Biotin:apoProtein Ligase
YCR084C	180.418	192.228	379.013	316.426	0.900288	7.01885e-13	4.2749e-12	S000000680	YCR084C	TUP1	dTMP-UPtake
YGR043C	385.609	348.924	687.962	654.325	0.869736	7.09137e-13	4.31538e-12	S000003275	YGR043C	NQM1	Non-Quiescent Mutant
YGL188C-A	6.29942	7.43671	1.91756	1.73687	-1.90124	7.5907e-13	4.6153e-12	S000028635	YGL188C-A
YNL271C	116.999	100.884	190.945	188.45	0.799767	7.67892e-13	4.66496e-12	S000005215	YNL271C	BNI1	Bud Neck Involved
YJR101W	128.324	129.654	78.3988	78.3959	-0.718278	7.90711e-13	4.79949e-12	S000003862	YJR101W	RSM26	Ribosomal Small subunit of Mitochondria
YDR512C	264.717	274.557	139.466	159.871	-0.84943	7.96636e-13	4.83134e-12	S000002920	YDR512C	EMI1	Early Meiotic Induction
YDL018C	88.4749	87.2123	51.4791	54.0797	-0.735239	7.97901e-13	4.8349e-12	S000002176	YDL018C	ERP3	Emp24p/Erv25p Related Protein
YLR312C	192.521	141.898	331.074	351.242	1.02842	8.14667e-13	4.9323e-12	S000004303	YLR312C	ATG39	AuTophaGy related
YOL097C	102.985	129.504	64.9021	58.0272	-0.918406	8.32473e-13	5.03583e-12	S000005457	YOL097C	WRS1	W (tryptophan) RS (tRNA synthetase)
YBR077C	127.829	126.875	71.3923	79.817	-0.752718	8.35489e-13	5.04978e-12	S000000281	YBR077C	SLM4	Synthetic Lethal with Mss4
YDR146C	48.2011	36.0568	80.8326	81.6328	0.945849	8.61431e-13	5.20217e-12	S000002553	YDR146C	SWI5	SWItching deficient
YGL168W	18.6859	16.9767	7.08023	7.65801	-1.27553	9.04123e-13	5.45536e-12	S000003136	YGL168W	HUR1	HydroxyUrea Resistance
YNL298W	41.2647	43.0428	73.8261	69.4747	0.765756	9.12288e-13	5.49997e-12	S000005242	YNL298W	CLA4	CLn Activity dependant
YLR437C	15.2885	17.9533	36.1387	33.8689	1.07571	9.25664e-13	5.57589e-12	S000004429	YLR437C	DIF1	Damage-regulated Import Facilitator
Q0085	0.42468	0.300473	2.95009	6.71063	3.69164	9.36773e-13	5.63804e-12	S000007268	Q0085	ATP6	ATP synthase
YMR283C	38.5043	35.0802	64.6808	65.2904	0.81993	9.54474e-13	5.73973e-12	S000004896	YMR283C	RIT1	Ribosylation of Initiator tRNA
YLR264W	147.222	189.974	90.4941	90.2382	-0.899338	9.65539e-13	5.80138e-12	S000004254	YLR264W	RPS28B	Ribosomal Protein of the Small subunit
YGL133W	116.716	116.133	190.281	201.95	0.752142	9.84423e-13	5.90985e-12	S000003101	YGL133W	ITC1	Imitation switch Two Complex
YDR461C-A	82.8833	74.8178	47.2015	45.2375	-0.770597	1.00261e-12	6.01398e-12	S000087209	YDR461C-A
YKR105C	11.9618	12.094	27.5096	24.9477	1.12493	1.0251e-12	6.14368e-12	S000001813	YKR105C	VBA5	Vacuolar Basic Amino acid transporter
YNL069C	519.242	781.23	284.61	279.636	-1.20453	1.04774e-12	6.2741e-12	S000005013	YNL069C	RPL16B	Ribosomal Protein of the Large subunit
YLR029C	834.708	1143.68	486.839	433.822	-1.10348	1.05012e-12	6.28306e-12	S000004019	YLR029C	RPL15A	Ribosomal Protein of the Large subunit
YBR212W	280.076	291.91	538.761	488.849	0.845308	1.08214e-12	6.46829e-12	S000000416	YBR212W	NGR1	Negative Growth Regulatory protein
YCL002C	71.3462	66.2543	39.2363	40.7374	-0.78334	1.08289e-12	6.46829e-12	S000000508	YCL002C
YDR069C	85.8561	78.0479	133.492	143.686	0.757381	1.1063e-12	6.60256e-12	S000002476	YDR069C	DOA4	Degradation Of Alpha
YDL173W	117.566	99.2312	211.817	184.819	0.871263	1.14256e-12	6.81329e-12	S000002332	YDL173W	PAR32	Phosphorylated After Rapamycin
YIR016W	130.306	115.983	245.227	205.266	0.871112	1.15359e-12	6.87332e-12	S000001455	YIR016W
YFL062W	9.69685	8.71372	20.2081	24.2372	1.26845	1.17036e-12	6.96739e-12	S000001832	YFL062W	COS4	COnserved Sequence
YLR034C	90.8107	79.0244	143.153	145.818	0.766236	1.22808e-12	7.30491e-12	S000004024	YLR034C	SMF3
snR5	34.1867	18.4791	6.78522	6.39483	-1.99767	1.27464e-12	7.57554e-12	S000007291	snR5	SNR5	Small Nucleolar RNA
YDR037W	342.575	418.484	207.318	196.345	-0.914657	1.27931e-12	7.59697e-12	S000002444	YDR037W	KRS1	Lysyl (K) tRNA Synthetase
YBL054W	59.2428	55.888	93.813	107.449	0.805027	1.2843e-12	7.62022e-12	S000000150	YBL054W	TOD6	Twin Of Dot6p
YKR059W	42.0433	50.8551	22.5682	22.7372	-1.03503	1.38724e-12	8.22421e-12	S000001767	YKR059W	TIF1	Translation Initiation Factor
YLR218C	85.7853	96.6772	54.2817	53.2113	-0.762746	1.39017e-12	8.23471e-12	S000004208	YLR218C	COA4	Cytochrome Oxidase Assembly factor
YPR026W	291.33	256.754	499.525	490.349	0.852731	1.42458e-12	8.43152e-12	S000006230	YPR026W	ATH1	Acid TreHalase
YPL189W	10.1923	7.73718	21.9044	21.6319	1.27643	1.45887e-12	8.6273e-12	S000006110	YPL189W	GUP2	Glycerol UPtake
YCL057C-A	391.696	369.732	220.372	214.582	-0.807821	1.46018e-12	8.62791e-12	S000007547	YCL057C-A	MIC10	MItochondrial contact site and Cristae organizing system
YIR010W	56.9779	56.6392	100.893	90.1592	0.750093	1.47702e-12	8.72017e-12	S000001449	YIR010W	DSN1	Dosage Suppressor of NNF1
YDL248W	21.0216	17.6528	43.6614	38.2111	1.08107	1.47949e-12	8.72752e-12	S000002407	YDL248W	COS7	COnserved Sequence
YKL222C	47.0687	49.0522	79.505	81.4749	0.743973	1.54318e-12	9.09572e-12	S000001705	YKL222C
YMR307W	674.25	683.426	395.313	357.953	-0.849817	1.54989e-12	9.12769e-12	S000004924	YMR307W	GAS1	Glycophospholipid-Anchored Surface protein
YDR476C	61.437	64.9773	114.759	102.159	0.77949	1.55512e-12	9.15094e-12	S000002884	YDR476C
YJR128W	0.920139	1.35213	5.90019	4.65796	2.21651	1.56377e-12	9.19426e-12	S000003889	YJR128W
YOR381W	34.1159	32.9769	58.4119	60.3956	0.823818	1.5798e-12	9.28084e-12	S000005908	YOR381W	FRE3	Ferric REductase
YDR272W	296.214	291.008	171.548	170.766	-0.778563	1.6081e-12	9.43933e-12	S000002680	YDR272W	GLO2	GLyOxalase
YLL044W	70.2845	117.184	37.6137	36.6321	-1.33546	1.60996e-12	9.44247e-12	S000003967	YLL044W
YMR183C	154.088	186.894	100.082	89.5276	-0.846023	1.62304e-12	9.51134e-12	S000004795	YMR183C	SSO2	Supressor of Sec One
YGL253W	334.506	457.47	197.361	186.319	-1.04534	1.62634e-12	9.52286e-12	S000003222	YGL253W	HXK2	HeXoKinase
YDL013W	102.135	97.4284	166.902	159.555	0.709949	1.64355e-12	9.6157e-12	S000002171	YDL013W	SLX5	Synthetic Lethal of unknown [X] function
YPR161C	81.3262	79.1746	128.182	136.739	0.722624	1.68245e-12	9.83522e-12	S000006365	YPR161C	SGV1	Suppressor of Gpa1-Val50 mutation
YGR064W	24.4191	30.7985	11.3579	11.8423	-1.24971	1.71102e-12	9.99404e-12	S000003296	YGR064W
YDR276C	393.253	365.3	214.177	218.451	-0.810175	1.71667e-12	1.00188e-11	S000002684	YDR276C	PMP3	Plasma Membrane Proteolipid
YDL023C	59.8091	56.4138	101.852	93.633	0.750103	1.72918e-12	1.00836e-11	S000002181	YDL023C
YNL068C	80.5476	76.6957	134.524	125.686	0.726626	1.74632e-12	1.01752e-11	S000005012	YNL068C	FKH2	ForK head Homolog
YJL179W	49.0505	51.5311	17.9956	25.8951	-1.19802	1.78745e-12	1.04063e-11	S000003715	YJL179W	PFD1	PreFolDin
YPR100W	66.1793	63.2496	37.1712	37.7374	-0.789117	1.79971e-12	1.04692e-11	S000006304	YPR100W	MRPL51	Mitochondrial Ribosomal Protein
YER033C	71.417	66.705	112.767	117.87	0.739182	1.8194e-12	1.05751e-11	S000000835	YER033C	ZRG8	Zinc Regulated Gene
YNL259C	108.647	79.6253	38.2037	49.106	-1.10977	1.86748e-12	1.08457e-11	S000005203	YNL259C	ATX1	AnTioXidant
YCR090C	68.9397	65.5782	38.9412	39.6322	-0.77589	1.97888e-12	1.14833e-11	S000000686	YCR090C
YOR332W	93.5711	103.513	60.3294	50.7639	-0.825841	2.02062e-12	1.1716e-11	S000005859	YOR332W	VMA4	Vacuolar Membrane Atpase
YPR141C	26.8256	29.2961	50.6679	55.264	0.916437	2.10853e-12	1.22158e-11	S000006345	YPR141C	KAR3	KARyogamy
YEL050W-A	12.3865	12.1692	4.6464	4.73691	-1.38659	2.24431e-12	1.29918e-11	S000028545	YEL050W-A
YFR031C-A	354.749	484.963	213.882	178.187	-1.0985	2.24693e-12	1.29965e-11	S000002104	YFR031C-A	RPL2A	Ribosomal Protein of the Large subunit
YMR180C	212.977	200.19	115.422	126.476	-0.772603	2.27897e-12	1.31711e-11	S000004792	YMR180C	CTL1	Capping enzyme mRNA Triphosphatase-Like
YNL055C	3903.37	3749.83	2183.73	1963.21	-0.884	2.44611e-12	1.41256e-11	S000005000	YNL055C	POR1	PORin
YJL161W	225.009	234.294	138.359	131.607	-0.766457	2.46755e-12	1.42379e-11	S000003697	YJL161W	FMP33	Found in Mitochondrial Proteome
YLR190W	116.291	107.72	189.396	184.424	0.73858	2.54626e-12	1.46801e-11	S000004180	YLR190W	MMR1	Mitochondrial Myo2p Receptor-related
YBR181C	142.126	193.054	89.9041	77.2906	-1.00269	2.56807e-12	1.47939e-11	S000000385	YBR181C	RPS6B	Ribosomal Protein of the Small subunit
YJL186W	139.366	121.692	230.771	224.372	0.801692	2.62194e-12	1.50921e-11	S000003722	YJL186W	MNN5	MaNNosyltransferase
YKL051W	103.622	103.964	63.5745	61.5799	-0.729728	2.73261e-12	1.57164e-11	S000001534	YKL051W	SFK1	Suppressor of Four Kinase
YBR011C	543.661	609.209	332.476	285.952	-0.898378	2.7694e-12	1.59151e-11	S000000215	YBR011C	IPP1	Inorganic PyroPhosphatase
YJL071W	33.6913	30.6482	57.6743	57.4745	0.838936	3.31353e-12	1.90268e-11	S000003607	YJL071W	ARG2	ARGinine requiring
YMR079W	122.095	135.664	78.9888	75.8695	-0.734581	3.71662e-12	2.13242e-11	S000004684	YMR079W	SEC14	SECretory
YDR481C	292.392	256.604	513.906	477.323	0.852338	3.7535e-12	2.15185e-11	S000002889	YDR481C	PHO8	PHOsphate metabolism
YGL042C	16.5625	19.5307	6.1952	7.89485	-1.35788	3.82915e-12	2.19345e-11	S000003010	YGL042C
YOR195W	131.58	121.316	205.105	241.03	0.818534	3.88956e-12	2.22626e-11	S000005721	YOR195W	SLK19	Synthetic Lethal Kar3p
YIR036W-A	26.047	30.5731	12.3166	13.3423	-1.14129	4.05496e-12	2.31907e-11	S000028803	YIR036W-A
YOR330C	95.6237	86.9118	152.004	149.292	0.722681	4.26052e-12	2.43468e-11	S000005857	YOR330C	MIP1	MItochondrial DNA Polymerase
YDR347W	205.828	211.233	127.297	126.002	-0.71931	4.34088e-12	2.47861e-11	S000002755	YDR347W	MRP1	Mitochondrial Ribosomal Protein
YMR245W	63.0649	63.0993	35.6224	38.1321	-0.774878	4.5821e-12	2.61425e-11	S000004859	YMR245W
YGL233W	115.301	120.79	68.4422	74.5274	-0.723844	4.62469e-12	2.63645e-11	S000003202	YGL233W	SEC15	SECretory
YLR433C	56.624	62.9491	100.156	100.738	0.748904	4.78929e-12	2.7281e-11	S000004425	YLR433C	CNA1	CalciNeurin A
Q0120	0.3539	0.0751182	2.06507	3.23689	3.53956	4.93888e-12	2.81106e-11	S000007273	Q0120	BI4
YOR125C	129.386	133.635	83.1189	78.0011	-0.706615	4.95889e-12	2.8202e-11	S000005651	YOR125C	CAT5	CATabolite repression
YPL256C	173.765	233.392	104.286	106.423	-0.950059	4.99053e-12	2.83593e-11	S000006177	YPL256C	CLN2	CycLiN
YDR263C	29.1613	29.221	50.9629	64.5799	0.983763	5.13337e-12	2.91435e-11	S000002671	YDR263C	DIN7	DNA Damage INducible
YMR009W	111.125	115.457	181.136	195.792	0.734163	5.13671e-12	2.91435e-11	S000004611	YMR009W	ADI1	Acireductone DIoxygenase
YML103C	100.72	106.893	55.1668	64.6588	-0.793468	5.19176e-12	2.94323e-11	S000004571	YML103C	NUP188	NUclear Pore
YOR178C	317.094	290.783	540.974	526.034	0.811648	5.80428e-12	3.28786e-11	S000005704	YOR178C	GAC1	Glycogen ACcumulation
YHR140W	36.0978	34.6295	58.8544	67.2641	0.833433	6.04991e-12	3.42428e-11	S000001182	YHR140W
YDR373W	116.787	108.997	64.4596	70.8168	-0.739582	6.11358e-12	3.45757e-11	S000002781	YDR373W	FRQ1	FReQuenin homolog
YNL247W	127.545	150.687	83.8564	76.0274	-0.798551	6.16493e-12	3.48384e-11	S000005191	YNL247W
YER144C	166.121	172.622	288.15	290.057	0.771417	6.39933e-12	3.61344e-11	S000000946	YER144C	UBP5	UBiquitin-specific Protease
YEL071W	320.35	287.778	537.95	534.245	0.818023	6.63917e-12	3.7459e-11	S000000797	YEL071W	DLD3	D-Lactate Dehydrogenase
YGR001C	89.6074	100.508	52.5854	59.1325	-0.767212	6.6763e-12	3.76387e-11	S000003233	YGR001C	EFM5	Elongation Factor Methyltransferase
YOR098C	139.861	130.255	230.919	224.372	0.753067	6.71628e-12	3.78341e-11	S000005624	YOR098C	NUP1	NUclear Pore
YFR034C	122.379	110.198	230.476	189.792	0.853602	6.90093e-12	3.88436e-11	S000001930	YFR034C	PHO4	PHOsphate metabolism
YLR268W	77.7164	82.7052	47.2753	49.2639	-0.732611	6.93171e-12	3.89861e-11	S000004258	YLR268W	SEC22	SECretory
YCR005C	1336.04	1149.76	2323.42	2269.3	0.88561	6.96743e-12	3.91544e-11	S000000598	YCR005C	CIT2	CITrate synthase
YOL118C	35.8854	30.1224	15.2667	15.9476	-1.08116	6.97262e-12	3.91544e-11	S000005478	YOL118C
YFL054C	211.632	212.059	366.475	355.979	0.769896	7.06546e-12	3.96445e-11	S000001840	YFL054C
YDR488C	16.067	15.6997	42.8501	31.5005	1.22731	7.09817e-12	3.97967e-11	S000002896	YDR488C	PAC11	Perish in the Absence of CIN8
YNL196C	42.8927	35.6812	66.4509	79.1854	0.888644	7.37454e-12	4.13137e-11	S000005140	YNL196C	SLZ1
YMR024W	143.966	151.514	92.8542	89.2908	-0.697647	7.57864e-12	4.24237e-11	S000004626	YMR024W	MRPL3	Mitochondrial Ribosomal Protein
YPL211W	51.7401	68.2825	28.0996	30.632	-1.03063	7.69465e-12	4.30393e-11	S000006132	YPL211W	NIP7	Nuclear ImPort
YGL106W	148.426	149.11	93.7392	90.9487	-0.687783	7.79712e-12	4.35783e-11	S000003074	YGL106W	MLC1	Myosin Light Chain
YGL081W	15.7131	13.8218	29.9435	30.632	1.03459	7.86154e-12	4.39038e-11	S000003049	YGL081W
YBR090C	115.301	120.415	62.0257	74.7643	-0.785682	8.14128e-12	4.54305e-11	S000000294	YBR090C
YNL095C	34.6114	32.376	58.0431	58.8956	0.803103	8.15449e-12	4.54686e-11	S000005039	YNL095C
YIR033W	227.133	209.505	131.648	130.818	-0.734358	8.16722e-12	4.5504e-11	S000001472	YIR033W	MGA2	Multicopy suppressor of GAm1 (snf2)
YBR096W	75.6638	80.0009	42.4076	48.9481	-0.769468	8.49898e-12	4.73154e-11	S000000300	YBR096W
YDR325W	42.1141	40.2634	68.7372	67.5799	0.726312	8.51349e-12	4.73592e-11	S000002733	YDR325W	YCG1	Yeast Cap G
YJR095W	763.22	766.807	454.388	399.48	-0.84138	8.73154e-12	4.85343e-11	S000003856	YJR095W	SFC1	Succinate-Fumarate Carrier
YLR187W	23.145	21.5589	41.3013	43.5796	0.923933	8.8172e-12	4.89722e-11	S000004177	YLR187W	SKG3	Suppressor of lethality of Kex2 Gas1 double null mutant
YIL138C	216.162	195.908	114.316	126.87	-0.773079	8.89813e-12	4.93832e-11	S000001400	YIL138C	TPM2	TroPoMyosin
YJL173C	180.135	168.04	104.655	107.528	-0.714667	9.06456e-12	5.02677e-11	S000003709	YJL173C	RFA3	Replication Factor A
YIL034C	318.934	326.764	186.593	194.687	-0.760029	9.48831e-12	5.25768e-11	S000001296	YIL034C	CAP2	CAPping
YLR412W	54.2174	54.9114	29.796	31.5005	-0.832352	9.56434e-12	5.29569e-11	S000004404	YLR412W	BER1	Benomyl REsistant 1
YIR025W	46.7148	42.3667	73.9736	74.2116	0.733487	9.81551e-12	5.43054e-11	S000001464	YIR025W	MND2	Meiotic Nuclear Divisions
YHR031C	24.5606	26.1411	46.0215	48.2376	0.894537	9.94407e-12	5.4974e-11	S000001073	YHR031C	RRM3	rDNA Recombination Mutation
YLR146W-A	18.8275	19.3805	6.26895	8.92118	-1.33352	1.01554e-11	5.60985e-11	S000113566	YLR146W-A
YLR299W	186.505	157.899	316.84	296.294	0.831916	1.02106e-11	5.63599e-11	S000004290	YLR299W	ECM38	ExtraCellular Mutant
YHR079C-A	0.49546	0.225355	2.65508	3.00004	2.92313	1.02392e-11	5.64741e-11	S000001957	YHR079C-A	SAE3	Sporulation in the Absence of spo Eleven
YJL196C	103.976	114.63	65.2708	66.9484	-0.725181	1.0433e-11	5.74986e-11	S000003732	YJL196C	ELO1	ELOngation defective
YLR019W	151.398	141.898	261.378	241.898	0.778937	1.04549e-11	5.75745e-11	S000004009	YLR019W	PSR2	Plasma membrane Sodium Response
YKL171W	173.269	164.885	296.116	281.53	0.772454	1.0479e-11	5.76626e-11	S000001654	YKL171W	NNK1	Nitrogen Network Kinase
YGL221C	168.456	182.688	107.678	105.949	-0.716725	1.05234e-11	5.78627e-11	S000003189	YGL221C	NIF3	Ngg1p-Interacting Factor
YNL125C	249.358	227.533	432.263	401.69	0.806243	1.06309e-11	5.84084e-11	S000005069	YNL125C	ESBP6
YDR055W	1694.76	1774.07	989.83	978.488	-0.817467	1.0753e-11	5.90337e-11	S000002462	YDR055W	PST1	Protoplasts-SecreTed
YLL060C	131.014	138.293	84.5202	81.9486	-0.69367	1.1025e-11	6.04806e-11	S000003983	YLL060C	GTT2	GlutaThione Transferase
YCR016W	48.2719	52.733	23.6745	28.3425	-0.958071	1.13253e-11	6.20801e-11	S000000609	YCR016W
YGL039W	37.0887	41.9911	19.8394	20.5266	-0.969579	1.13397e-11	6.21114e-11	S000003007	YGL039W
YEL003W	131.155	109.222	50.5941	69.3958	-1.00343	1.14064e-11	6.24283e-11	S000000729	YEL003W	GIM4	Gene Involved in Microtubule biogenesis
YHR048W	54.0051	50.8551	83.5614	87.9487	0.709178	1.15329e-11	6.30723e-11	S000001090	YHR048W	YHK8
YDR399W	193.371	242.181	122.134	120.475	-0.84391	1.19507e-11	6.53075e-11	S000002807	YDR399W	HPT1	Hypoxanthine guanine PhosphoribosylTransferase
YLR118C	93.3588	98.5551	60.9194	54.3955	-0.734	1.2284e-11	6.70772e-11	S000004108	YLR118C
YOL060C	219.559	197.11	408.293	347.452	0.858968	1.24704e-11	6.80431e-11	S000005421	YOL060C	MAM3
YDR155C	1410.72	1611.44	854.864	814.67	-0.856091	1.26105e-11	6.87546e-11	S000002562	YDR155C	CPR1	Cyclosporin A-sensitive Proline Rotamase
YPL237W	158.476	175.176	100.819	103.738	-0.705696	1.28497e-11	7.00051e-11	S000006158	YPL237W	SUI3	SUppressor of Initiator codon
YBR254C	27.3211	30.6482	13.5704	14.3686	-1.05248	1.28954e-11	7.02009e-11	S000000458	YBR254C	TRS20	TRapp Subunit
YGL053W	59.6675	60.0946	95.3618	101.133	0.714047	1.29099e-11	7.02257e-11	S000003021	YGL053W	PRM8	Pheromone-Regulated Membrane protein
YFL010C	123.44	138.668	81.7176	75.9485	-0.732668	1.29215e-11	7.02353e-11	S000001884	YFL010C	WWM1	WW domain containing protein interacting with Metacaspase
YDL008W	64.0559	66.3294	39.9738	37.5795	-0.748758	1.34214e-11	7.28971e-11	S000002166	YDL008W	APC11	Anaphase Promoting Complex
YPR188C	98.738	101.485	60.7719	61.8956	-0.706783	1.34323e-11	7.29007e-11	S000006392	YPR188C	MLC2	Myo1p Light Chain
YDR310C	123.865	126.95	211.153	199.108	0.71004	1.40831e-11	7.63746e-11	S000002718	YDR310C	SUM1	SUppresor of Mar1-1
YGR078C	22.7911	30.9487	10.6941	11.0528	-1.3036	1.42464e-11	7.72016e-11	S000003310	YGR078C	PAC10	Perish in the Absence of Cin8p
YDL214C	135.048	123.269	213.956	213.003	0.724722	1.42934e-11	7.73974e-11	S000002373	YDL214C	PRR2	Pheromone Response Regulator
YDR454C	156.211	187.645	101.631	97.5804	-0.787074	1.45277e-11	7.86061e-11	S000002862	YDR454C	GUK1	GUanylate Kinase
YGL157W	34.2575	49.9536	12.1691	17.6055	-1.50056	1.47008e-11	7.94822e-11	S000003125	YGL157W	ARI1	Aldehyde Reductase Intermediate
YOR363C	78.0703	64.6017	120.216	123.712	0.772968	1.47386e-11	7.96266e-11	S000005890	YOR363C	PIP2	Peroxisome Induction Pathway
YKL190W	141.56	141.898	86.069	90.6329	-0.681972	1.4765e-11	7.97089e-11	S000001673	YKL190W	CNB1	CalciNeurin subunit B
YBL077W	12.3157	14.4227	2.36008	4.97376	-1.87125	1.47843e-11	7.97526e-11	S000000173	YBL077W
YDR297W	135.685	125.147	221.11	210.95	0.727973	1.50226e-11	8.09767e-11	S000002705	YDR297W	SUR2	SUppressor of Rvs161 and rvs167 mutations
YLR078C	159.892	145.354	89.4616	96.712	-0.713739	1.50456e-11	8.10392e-11	S000004068	YLR078C	BOS1	Bet One Suppressor
YJL148W	57.1194	70.9867	35.1061	33.5531	-0.898698	1.54364e-11	8.30816e-11	S000003684	YJL148W	RPA34	RNA Polymerase A
YHR089C	118.91	152.265	78.325	67.8957	-0.890212	1.55145e-11	8.34388e-11	S000001131	YHR089C	GAR1	Glycine Arginine Rich
YJR161C	22.508	20.4322	42.5551	39.6322	0.935967	1.58984e-11	8.54391e-11	S000003922	YJR161C	COS5	COnserved Sequence
YLR013W	0.990919	1.05166	3.98263	6.07904	2.28641	1.6765e-11	9.0028e-11	S000004003	YLR013W	GAT3
YDR165W	61.9325	65.0524	32.9673	39.0006	-0.820034	1.69966e-11	9.11662e-11	S000002572	YDR165W	TRM82	Transfer RNA Methyltransferase
YPL197C	9.69685	14.7232	3.98263	3.15794	-1.76632	1.70025e-11	9.11662e-11	S000006118	YPL197C
YML042W	762.512	690.262	1329.53	1255.12	0.831137	1.7023e-11	9.12077e-11	S000004506	YML042W	CAT2	Carnitine AcetylTransferase
YKR096W	176.384	158.575	292.649	283.346	0.781924	1.70532e-11	9.13006e-11	S000001804	YKR096W	ESL2	EST/SMG-like
YPL090C	244.191	291.759	156.207	135.949	-0.874964	1.71965e-11	9.19986e-11	S000006011	YPL090C	RPS6A	Ribosomal Protein of the Small subunit
YNL289W	96.9685	124.771	61.8045	59.2903	-0.872018	1.72205e-11	9.2058e-11	S000005233	YNL289W	PCL1	Pho85 CycLin
YLR173W	104.896	90.6677	160.928	161.923	0.722752	1.7419e-11	9.30493e-11	S000004163	YLR173W
YEL070W	117.282	128.302	73.0886	77.4485	-0.706068	1.76942e-11	9.44487e-11	S000000796	YEL070W	DSF1	Deletion Suppressor of mptFive/pufFive mutation
YJL132W	94.7036	100.508	152.151	163.187	0.69182	1.79482e-11	9.57324e-11	S000003668	YJL132W
YBL016W	101.498	103.363	177.006	157.739	0.708664	1.7978e-11	9.58199e-11	S000000112	YBL016W	FUS3	cell FUSion
YBR109C	281.846	301.374	165.353	178.029	-0.764265	1.8907e-11	1.00696e-10	S000000313	YBR109C	CMD1	CalMoDulin
YFL052W	56.8363	48.301	97.4269	85.2644	0.796759	1.89232e-11	1.00707e-10	S000001842	YFL052W	ZNF1	ZiNc Finger protein
YGR152C	33.125	45.4465	14.1605	17.8424	-1.29595	1.89417e-11	1.0073e-10	S000003384	YGR152C	RSR1	RaS-Related
YCR107W	21.4463	20.5073	40.0475	38.8427	0.910584	1.93687e-11	1.02924e-10	S000000704	YCR107W	AAD3	Aryl-Alcohol Dehydrogenase
YDR100W	76.7963	78.7239	44.9152	49.8165	-0.71568	1.98004e-11	1.0514e-10	S000002507	YDR100W	TVP15	Tlg2-Vesicle Protein
YKL074C	56.8363	51.6062	86.5853	90.9487	0.710373	2.03727e-11	1.08098e-10	S000001557	YKL074C	MUD2	Mutant U1 Die
YHL045W	1.4156	1.57748	5.01516	7.26326	2.02752	2.059e-11	1.0917e-10	S000001037	YHL045W
snR82	49.1921	34.8549	18.3643	17.5266	-1.22773	2.06509e-11	1.09411e-10	S000028467	snR82	SNR82	Small Nucleolar RNA
YER007C-A	68.5858	83.832	43.2926	43.1059	-0.818185	2.12124e-11	1.12303e-10	S000002957	YER007C-A	TMA20	Translation Machinery Associated
YOR066W	79.769	71.9633	122.06	124.107	0.697598	2.13686e-11	1.13042e-10	S000005592	YOR066W	MSA1	Mbf and Sbf Associated
YOL100W	132.359	120.49	202.081	218.924	0.735202	2.13837e-11	1.13042e-10	S000005460	YOL100W	PKH2	Pkb-activating Kinase Homolog
YER071C	65.4715	65.428	39.9738	38.7637	-0.732967	2.15955e-11	1.14077e-10	S000000873	YER071C	TDA2	Topoisomerase I Damage Affected
YOR356W	153.522	146.706	270.745	243.793	0.777231	2.20666e-11	1.16479e-10	S000005883	YOR356W	CIR2	Changed Intracellular Redox state
YML058W-A	0.778579	0.300473	2.87634	4.57901	2.74637	2.23423e-11	1.17847e-10	S000007472	YML058W-A	HUG1
YLR145W	31.9218	39.2868	16.8155	17.1318	-1.06766	2.29455e-11	1.20939e-10	S000004135	YLR145W	RMP1	RNase MRP Protein
YDL067C	362.889	318.051	193.526	199.74	-0.792129	2.315e-11	1.21894e-10	S000002225	YDL067C	COX9	Cytochrome c OXidase
YLR293C	221.187	281.017	142.121	121.975	-0.926764	2.3161e-11	1.21894e-10	S000004284	YLR293C	GSP1	Genetic Suppressor of Prp20-1
YOL064C	109.992	125.222	70.6548	71.6853	-0.724305	2.33265e-11	1.22675e-10	S000005425	YOL064C	MET22	METhionine requiring
YOR391C	28.2412	27.1177	49.7091	49.9744	0.848018	2.37239e-11	1.24673e-10	S000005918	YOR391C	HSP33	Heat-Shock Protein
YKR005C	19.3937	16.0753	34.4423	41.9217	1.10396	2.46967e-11	1.29689e-10	S000001713	YKR005C
YGR270W	145.524	152.039	243.235	258.872	0.754762	2.48379e-11	1.30335e-10	S000003502	YGR270W	YTA7	Yeast Tat-binding Analog
YBR256C	250.773	232.266	143.006	144.95	-0.746371	2.54699e-11	1.33553e-10	S000000460	YBR256C	RIB5	RIBoflavin biosynthesis
YDL212W	242.563	231.965	141.826	143.449	-0.734179	2.58539e-11	1.35467e-10	S000002371	YDL212W	SHR3	Super high Histidine Resistant
YPR167C	31.9925	38.3103	17.2581	17.0529	-1.03363	2.66015e-11	1.39282e-10	S000006371	YPR167C	MET16	METhionine requiring
YGR175C	292.958	344.492	661.337	545.613	0.921115	2.67076e-11	1.39734e-10	S000003407	YGR175C	ERG1	ERGosterol biosynthesis
YNL044W	41.3355	48.2259	72.7936	85.7381	0.823841	2.69255e-11	1.40771e-10	S000004989	YNL044W	YIP3	Ypt-Interacting Protein
YLR144C	104.684	105.842	64.6808	66.001	-0.687931	2.70888e-11	1.41521e-10	S000004134	YLR144C	ACF2	Assembly Complementing Factor
YAL062W	1411.64	1110.55	2682.82	2307.9	0.984551	2.77208e-11	1.44717e-10	S000000058	YAL062W	GDH3	Glutamate DeHydrogenase
YPL168W	120.184	103.137	64.5333	67.8957	-0.754409	2.81635e-11	1.4692e-10	S000006089	YPL168W	MRX4	Mitochondrial oRganization of gene eXpression (MIOREX)
YLR361C	64.2682	54.2354	103.253	98.7646	0.76892	2.93361e-11	1.52925e-10	S000004353	YLR361C	DCR2	Dose-dependent Cell cycle Regulator
YJR098C	23.3574	22.0848	43.9564	40.8953	0.900627	2.93605e-11	1.52941e-10	S000003859	YJR098C
YBR068C	1321.53	1180.93	2307.78	2175.27	0.841114	2.9471e-11	1.53404e-10	S000000272	YBR068C	BAP2	Branched-chain Amino acid Permease
YDR298C	755.576	781.68	456.601	434.454	-0.786718	2.96584e-11	1.54267e-10	S000002706	YDR298C	ATP5	ATP synthase
YKL138C	119.477	122.893	76.1124	76.4222	-0.667951	2.99799e-11	1.55825e-10	S000001621	YKL138C	MRPL31	Mitochondrial Ribosomal Protein
YDR460W	69.152	66.1792	111.292	106.659	0.687396	3.00572e-11	1.56113e-10	S000002868	YDR460W	TFB3	Transcription Factor B subunit 3
YOR032C	59.172	54.01	89.8304	93.3961	0.694273	3.04406e-11	1.57876e-10	S000005558	YOR032C	HMS1	High-copy Mep Suppressor
YKL013C	268.539	296.717	170.22	159.792	-0.776156	3.04443e-11	1.57876e-10	S000001496	YKL013C	ARC19	ARp2/3 Complex subunit
YDR197W	64.2682	73.1652	38.3512	42.0006	-0.774318	3.04631e-11	1.57876e-10	S000002605	YDR197W	CBS2	Cytochrome B Synthesis
YDR464W	100.154	75.4187	159.084	158.844	0.855949	3.09654e-11	1.60363e-10	S000002872	YDR464W	SPP41	Suppressor of PrP4
YPL152W	108.435	100.133	52.8067	65.4483	-0.819582	3.10651e-11	1.60763e-10	S000006073	YPL152W	RRD2	Resistant to Rapamycin Deletion
YGR288W	65.4007	59.1181	106.203	99.8699	0.726486	3.14881e-11	1.62833e-10	S000003520	YGR288W	MAL13	MALtose fermentation
YDR403W	29.2321	24.5637	48.4553	59.4482	1.00235	3.18454e-11	1.64561e-10	S000002811	YDR403W	DIT1	DITyrosine
YKL068W-A	21.0924	25.2397	10.2516	10.5791	-1.15196	3.21867e-11	1.66205e-10	S000028524	YKL068W-A
YBR197C	53.9343	52.6579	87.544	83.6854	0.683805	3.27818e-11	1.69155e-10	S000000401	YBR197C
YOR103C	29.3029	29.3712	12.5379	15.4739	-1.0682	3.28283e-11	1.69272e-10	S000005629	YOR103C	OST2	OligoSaccharylTransferase
YJL033W	45.7946	46.8738	73.3098	76.738	0.695075	3.40276e-11	1.7533e-10	S000003570	YJL033W	HCA4	Helicase CA
YMR105W-A	3.1851	2.70426	10.3253	7.89485	1.62654	3.45043e-11	1.77657e-10	S000028692	YMR105W-A
YER026C	217.861	182.537	358.805	347.689	0.81905	3.48031e-11	1.79066e-10	S000000828	YER026C	CHO1	CHOline requiring
YMR198W	13.3066	14.6481	28.9847	27.3951	1.01284	3.70911e-11	1.90701e-10	S000004811	YMR198W	CIK1	Chromosome Instability and Karyogamy
YGR269W	4.38836	3.60568	10.0303	11.5265	1.42494	3.76377e-11	1.93372e-10	S000003501	YGR269W
YNL208W	779.57	841.475	1448.5	1384.2	0.805276	3.77052e-11	1.93579e-10	S000005152	YNL208W
YDR389W	73.9651	77.0713	122.429	118.028	0.671103	3.92656e-11	2.01444e-10	S000002797	YDR389W	SAC7	Suppressor of ACtin
YKL032C	309.733	279.29	547.316	488.928	0.814931	3.98797e-11	2.04448e-10	S000001515	YKL032C	IXR1	Intrastrand cross (X)-link Recognition
YNL135C	533.752	524.701	323.257	289.741	-0.787894	4.02555e-11	2.06226e-10	S000005079	YNL135C	FPR1	Fk 506-sensitive Proline Rotamase
YNR053C	74.8144	75.0431	42.8501	48.1586	-0.720179	4.03597e-11	2.06612e-10	S000005336	YNR053C	NOG2	NucleOlar G-protein
YBL023C	67.9488	65.5782	106.425	107.607	0.680419	4.04927e-11	2.07143e-10	S000000119	YBL023C	MCM2	MiniChromosome Maintenance
YLR410W-B	3.04354	3.07985	9.36655	8.21065	1.52013	4.11661e-11	2.10437e-10	S000007380	YLR410W-B
YDR293C	595.826	582.542	1020.59	998.225	0.776703	4.31926e-11	2.20639e-10	S000002701	YDR293C	SSD1	Suppressor of SIT4 Deletion
YKR067W	374.851	335.253	620.626	611.772	0.795287	4.32984e-11	2.2102e-10	S000001775	YKR067W	GPT2	Glycerol-3-Phosphate acylTransferase
YBR145W	71.0631	66.1041	117.119	107.054	0.708594	4.34228e-11	2.21497e-10	S000000349	YBR145W	ADH5	Alcohol DeHydrogenase
YLR022C	42.468	52.2823	23.527	24.474	-0.980356	4.36975e-11	2.22739e-10	S000004012	YLR022C	SDO1
YMR033W	104.471	104.039	61.362	66.8694	-0.70174	4.55825e-11	2.32181e-10	S000004636	YMR033W	ARP9	Actin-Related Protein
YMR118C	175.322	153.091	284.758	278.688	0.778563	4.56669e-11	2.32444e-10	S000004724	YMR118C	SHH3	SDH3 Homolog
YBR111C	361.756	370.483	225.903	205.661	-0.762572	4.61427e-11	2.34699e-10	S000000315	YBR111C	YSA1
YLR223C	60.3045	61.1463	94.4768	107.291	0.731881	4.75895e-11	2.41885e-10	S000004213	YLR223C	IFH1	Interacts with Fork Head
YCR095C	76.3008	69.1088	35.9174	45.3165	-0.841402	4.8942e-11	2.48582e-10	S000000691	YCR095C	OCA4	Oxidant-induced Cell-cycle Arrest
YGR222W	78.7073	80.6019	46.169	51.0797	-0.712534	5.20462e-11	2.6416e-10	S000003454	YGR222W	PET54	PETite colonies
YGR214W	474.721	619.2	300.025	268.346	-0.944429	5.23776e-11	2.65653e-10	S000003446	YGR214W	RPS0A	Ribosomal Protein of the Small subunit
YPL071C	88.9704	95.8509	53.6917	59.6061	-0.706272	5.25102e-11	2.66136e-10	S000005992	YPL071C
YBR104W	46.2193	42.8925	24.7808	24.0004	-0.869118	5.42133e-11	2.74573e-10	S000000308	YBR104W	YMC2	Yeast Mitochondrial Carrier
YNL302C	478.472	630.543	303.417	261.083	-0.974041	5.70444e-11	2.88706e-10	S000005246	YNL302C	RPS19B	Ribosomal Protein of the Small subunit
YDR291W	52.8726	49.7283	80.9801	83.5275	0.680526	5.7663e-11	2.9163e-10	S000002699	YDR291W	HRQ1	Homologous to RecQ protein
YOR162C	56.624	57.6908	88.9453	91.8961	0.661582	5.83435e-11	2.94862e-10	S000005688	YOR162C	YRR1	Yeast Reveromycin-A Resistant
YHR061C	21.9418	22.6106	41.5963	40.1848	0.87642	5.85393e-11	2.95642e-10	S000001103	YHR061C	GIC1	GTPase Interactive Component
YPL104W	98.8796	101.935	63.6483	61.1062	-0.686379	5.95979e-11	3.00775e-10	S000006025	YPL104W	MSD1	Mitochondrial aminoacyl-tRNA Synthetase
YPL263C	65.5422	74.4422	41.3013	42.5533	-0.738886	6.20145e-11	3.1275e-10	S000006184	YPL263C	KEL3	KELch
YKL114C	90.5276	96.8274	55.388	60.7114	-0.690631	6.21882e-11	3.13404e-10	S000001597	YKL114C	APN1	APurinic/apyrimidinic eNdonuclease
YJL011C	22.5788	21.8594	9.95657	11.2107	-1.07092	6.41665e-11	3.23145e-10	S000003548	YJL011C	RPC17	RNA Polymerase C
YFL034W	63.1357	63.2496	102.737	99.7909	0.680329	6.46176e-11	3.25187e-10	S000001860	YFL034W	MIL1	Medium adaptin-Interacting Ligand
YJR118C	69.6475	64.151	35.1799	41.6848	-0.800882	6.50166e-11	3.26964e-10	S000003879	YJR118C	ILM1	Increased Loss of Mitochondrial DNA
YGL192W	187.779	162.331	321.929	288.478	0.801847	6.53542e-11	3.2843e-10	S000003160	YGL192W	IME4	Inducer of MEiosis
YLR355C	725.282	816.085	1553.89	1295.94	0.886712	6.56419e-11	3.29644e-10	S000004347	YLR355C	ILV5	IsoLeucine-plus-Valine requiring
YPL065W	72.2663	67.0806	38.72	44.2901	-0.748378	6.69981e-11	3.36217e-10	S000005986	YPL065W	VPS28	Vacuolar Protein Sorting
YBR243C	45.0868	41.7657	69.2535	71.9221	0.700069	7.0777e-11	3.54931e-10	S000000447	YBR243C	ALG7	Asparagine-Linked Glycosylation
YPR033C	179.64	203.345	117.93	114.16	-0.722295	7.23208e-11	3.62418e-10	S000006237	YPR033C	HTS1	Histidine-Trna Synthetase
YEL068C	34.9653	41.4653	20.1344	18.0003	-1.00112	7.40494e-11	3.70819e-10	S000000794	YEL068C
YBR047W	61.2954	50.9302	94.9193	92.6856	0.740481	7.41259e-11	3.70942e-10	S000000251	YBR047W	FMP23	Found in Mitochondrial Proteome
YKR020W	47.4226	45.6719	71.9085	84.396	0.746649	7.62472e-11	3.81289e-10	S000001728	YKR020W	VPS51	Vacuolar Protein Sorting
YOL007C	78.5657	81.2028	49.7091	49.9744	-0.680361	7.75654e-11	3.87609e-10	S000005367	YOL007C	CSI2	Chitin Synthesis Involved
YCR045C	48.0596	48.6015	79.8	74.7643	0.677481	7.8216e-11	3.90587e-10	S000000641	YCR045C	RRT12	Regulator of rDNA Transcription
YPR010C-A	1298.6	820.592	415.963	490.902	-1.22462	7.8893e-11	3.93691e-10	S000122558	YPR010C-A
YJL138C	96.827	107.494	64.0908	60.0798	-0.717824	7.90368e-11	3.94133e-10	S000003674	YJL138C	TIF2	Translation Initiation Factor
YGR195W	53.5096	58.6673	32.5985	32.1321	-0.792581	8.02542e-11	3.99924e-10	S000003427	YGR195W	SKI6	SuperKIller
YLR126C	34.9653	42.2916	18.4381	19.974	-1.00764	8.13422e-11	4.05062e-10	S000004116	YLR126C
YKR065C	184.736	202.894	118.963	119.686	-0.699627	8.30423e-11	4.1324e-10	S000001773	YKR065C	PAM17	Presequence translocase-Associated Motor
YER032W	31.0724	34.0286	59.7394	54.2376	0.808829	8.57002e-11	4.26169e-10	S000000834	YER032W	FIR1	Factor Interacting with REF2
YDR107C	57.261	54.3856	91.2317	86.3697	0.66958	8.64957e-11	4.29824e-10	S000002514	YDR107C	TMN2	TransMembrane Nine
YDR013W	50.7492	52.6579	24.4858	30.3162	-0.917105	8.84508e-11	4.39029e-10	S000002420	YDR013W	PSF1	Partner of Sld Five
YHR083W	123.794	139.495	82.7501	79.817	-0.695134	8.84712e-11	4.39029e-10	S000001125	YHR083W	SAM35	Sorting and Assembly Machinery
YPL215W	119.618	127.551	78.4725	77.7643	-0.661488	8.9448e-11	4.43567e-10	S000006136	YPL215W	CBP3	Cytochrome B mRNA Processing
YLR086W	55.4207	56.7894	85.479	95.3698	0.688174	9.00857e-11	4.46419e-10	S000004076	YLR086W	SMC4	Structural Maintenance of Chromosomes
YNL102W	76.23	84.5831	49.6353	48.7902	-0.707694	9.31541e-11	4.61304e-10	S000005046	YNL102W	POL1	POLymerase
YCL019W	1.7695	1.42725	5.38392	6.00009	1.82121	9.5375e-11	4.71974e-10	S000000524	YCL019W
YIL146C	82.034	73.8412	124.346	124.818	0.676238	9.54904e-11	4.72217e-10	S000001408	YIL146C	ATG32	AuTophaGy related
YER054C	183.179	180.584	299.361	297.162	0.713538	9.56431e-11	4.72644e-10	S000000856	YER054C	GIP2	Glc7-Interacting Protein
YIL120W	64.1266	65.1275	102.368	103.423	0.670923	9.57102e-11	4.72648e-10	S000001382	YIL120W	QDR1	QuiniDine Resistance
YOL128C	19.7476	17.9533	34.3686	41.5269	1.00755	9.70093e-11	4.78731e-10	S000005488	YOL128C	YGK3	Yeast homolog of Glycogen synthase Kinase
YNL222W	32.7711	36.8831	16.373	18.7898	-0.986451	9.72932e-11	4.798e-10	S000005166	YNL222W	SSU72	Suppressor of SUa7
YHR079C	81.6801	73.2403	128.108	121.265	0.686474	9.88727e-11	4.87252e-10	S000001121	YHR079C	IRE1	Inositol REquiring
YGL201C	70.9215	74.8178	119.11	112.344	0.667676	1.00373e-10	4.94306e-10	S000003169	YGL201C	MCM6	MiniChromosome Maintenance
YOR361C	212.623	271.477	133.713	134.686	-0.850699	1.02962e-10	5.06704e-10	S000005888	YOR361C	PRT1	PRoTein synthesis
YER111C	73.0449	86.9118	40.6375	49.3428	-0.830389	1.05022e-10	5.16483e-10	S000000913	YER111C	SWI4	SWItching deficient
YMR063W	14.793	15.1739	30.6072	28.0267	0.968731	1.10913e-10	5.45079e-10	S000004667	YMR063W	RIM9	Regulator of IME2
YLR430W	101.923	108.17	162.034	174.792	0.680925	1.11264e-10	5.46348e-10	S000004422	YLR430W	SEN1	Splicing ENdonuclease
YDL222C	371.949	271.853	699.246	596.061	1.0085	1.11324e-10	5.46348e-10	S000002381	YDL222C	FMP45	Found in Mitochondrial Proteome
YGL258W-A	3.32666	3.90615	10.1041	9.07908	1.4084	1.1377e-10	5.57967e-10	S000007607	YGL258W-A
YOR054C	109.284	108.396	177.522	168.081	0.666959	1.17737e-10	5.77027e-10	S000005580	YOR054C	VHS3	Viable in a Hal3 Sit4 background
YLR435W	39.2829	43.7188	20.6507	23.2109	-0.920384	1.18142e-10	5.78614e-10	S000004427	YLR435W	TSR2	Twenty S rRNA accumulation
YLR401C	56.624	56.1133	92.2642	86.0539	0.661655	1.19491e-10	5.84816e-10	S000004393	YLR401C	DUS3	DihydroUridine Synthase
YGL044C	62.2156	62.6486	96.1731	106.186	0.696164	1.21239e-10	5.92965e-10	S000003012	YGL044C	RNA15	poly(A) mRNA metabolism
YFL031W	343.566	293.487	546.874	564.166	0.802289	1.21771e-10	5.95159e-10	S000001863	YFL031W	HAC1	Homologous to Atf/Creb1
YBR298C	211.703	199.063	343.686	336.242	0.726982	1.23513e-10	6.03258e-10	S000000502	YBR298C	MAL31	MALtose fermentation
YCR037C	103.905	97.3532	174.351	152.213	0.698371	1.2483e-10	6.09274e-10	S000000633	YCR037C	PHO87	PHOsphate metabolism
YHR163W	103.197	124.997	70.0647	59.6061	-0.814375	1.25885e-10	6.13929e-10	S000001206	YHR163W	SOL3	Suppressor Of Los1-1
YOR018W	85.4314	89.9165	56.6418	53.9218	-0.664758	1.25956e-10	6.13929e-10	S000005544	YOR018W	ROD1	Resistance to O-Dinitrobenzene
YOL034W	47.0687	50.7799	76.5549	79.4222	0.672873	1.27587e-10	6.21453e-10	S000005394	YOL034W	SMC5	Structural Maintenance of Chromosomes
YER112W	156.565	168.64	90.7154	106.817	-0.719588	1.27773e-10	6.21934e-10	S000000914	YER112W	LSM4	Like SM
YFR029W	58.6766	58.9678	107.383	90.475	0.750477	1.30532e-10	6.34927e-10	S000001925	YFR029W	PTR3	Peptide TRansport
YDR490C	74.2482	73.1652	114.537	116.291	0.646774	1.32152e-10	6.4237e-10	S000002898	YDR490C	PKH1	Pkb-activating Kinase Homolog
YEL001C	83.0957	90.7428	54.0605	54.7113	-0.67611	1.34265e-10	6.52197e-10	S000000727	YEL001C	IRC22	Increased Recombination Centers
YIL048W	88.9704	84.0573	136.516	135.476	0.652321	1.42828e-10	6.93318e-10	S000001310	YIL048W	NEO1	NEOmycin-resistance
YMR087W	52.5187	52.0569	31.3447	28.1057	-0.813803	1.4498e-10	7.03286e-10	S000004693	YMR087W
YGR183C	819.561	718.806	390.592	460.665	-0.853837	1.45535e-10	7.05498e-10	S000003415	YGR183C	QCR9	ubiQuinol-cytochrome C oxidoReductase
YHR077C	159.326	148.208	248.914	261.004	0.72931	1.4857e-10	7.19719e-10	S000001119	YHR077C	NMD2	Nonsense-mediated MRNA Decay
YJR145C	404.649	573.678	255.773	228.714	-1.01366	1.51485e-10	7.33341e-10	S000003906	YJR145C	RPS4A	Ribosomal Protein of the Small subunit
YOR304C-A	31.1432	37.9347	17.5531	16.5792	-1.0154	1.55734e-10	7.53399e-10	S000005830	YOR304C-A	BIL1	Bud6-Interacting Ligand
YDR058C	79.6982	74.5173	49.4141	47.3691	-0.671998	1.57516e-10	7.61505e-10	S000002465	YDR058C	TGL2	TriacylGlycerol Lipase
YBR133C	77.2917	85.5597	130.468	128.133	0.667528	1.60524e-10	7.75519e-10	S000000337	YBR133C	HSL7	Histone Synthetic Lethal
YPL241C	51.0323	51.2306	24.0433	30.2373	-0.915042	1.61306e-10	7.78773e-10	S000006162	YPL241C	CIN2	Chromosome INstability
YPL107W	104.33	95.5504	152.962	164.608	0.667463	1.62255e-10	7.82821e-10	S000006028	YPL107W
YPR131C	38.0088	41.7657	21.7569	21.474	-0.883021	1.65728e-10	7.99038e-10	S000006335	YPR131C	NAT3	N-terminal AcetylTransferase
YDR196C	226.142	214.838	135.852	137.449	-0.690279	1.66457e-10	8.02012e-10	S000002604	YDR196C	CAB5
YKL203C	88.4749	80.677	130.394	140.213	0.677318	1.68803e-10	8.12763e-10	S000001686	YKL203C	TOR2	Target Of Rapamycin
YNL238W	94.9867	85.3343	155.47	138.634	0.705645	1.70984e-10	8.22707e-10	S000005182	YNL238W	KEX2	Killer EXpression defective
YGL226W	76.1592	73.9915	44.3989	48.8691	-0.687614	1.76971e-10	8.50939e-10	S000003195	YGL226W	MTC3	Maintenance of Telomere Capping
YHR193C	439.756	513.433	285.348	259.03	-0.807979	1.79218e-10	8.61165e-10	S000001236	YHR193C	EGD2	Enhancer of Gal4 DNA binding
YMR018W	16.3502	11.4931	29.8697	33.8689	1.19164	1.84361e-10	8.85283e-10	S000004620	YMR018W
SRG1	909.239	681.022	367.508	436.191	-0.984642	1.88068e-10	9.02473e-10	S000029010	SRG1	SRG1	SER3 Regulatory Gene
YPR195C	28.7367	27.4182	14.603	14.4476	-0.950562	1.88617e-10	9.04501e-10	S000006399	YPR195C
YNL275W	30.3646	28.4698	49.2666	55.6587	0.833468	1.94072e-10	9.30032e-10	S000005219	YNL275W	BOR1	BORon transporter
YFL013W-A	8.06891	7.28647	2.65508	2.68425	-1.52202	1.94952e-10	9.33621e-10	S000028628	YFL013W-A
YLR191W	62.5695	58.442	94.3293	96.8698	0.659417	2.0161e-10	9.64857e-10	S000004181	YLR191W	PEX13	PEroXin
YKL207W	215.1	201.843	133.418	127.502	-0.676177	2.06317e-10	9.86722e-10	S000001690	YKL207W	EMC3	ER Membrane protein Complex
YNL262W	93.6419	94.048	147.283	144.555	0.636832	2.07195e-10	9.90255e-10	S000005206	YNL262W	POL2	POLymerase
YGR261C	82.5294	97.4284	52.0692	56.1324	-0.733754	2.08616e-10	9.96378e-10	S000003493	YGR261C	APL6	clathrin Adaptor Protein complex Large chain
YPL227C	41.9017	43.1179	23.7483	23.9214	-0.8344	2.11514e-10	1.00954e-09	S000006148	YPL227C	ALG5	Asparagine-Linked Glycosylation
YDR033W	301.381	276.06	528.878	465.244	0.783733	2.1534e-10	1.02711e-09	S000002440	YDR033W	MRH1	Membrane protein Related to Hsp30p
YFR011C	295.789	294.614	171.622	187.424	-0.717657	2.16194e-10	1.0305e-09	S000001907	YFR011C	MIC19	MItochondrial contact site and Cristae organizing system
YDR524C-B	837.398	980.443	518.332	524.534	-0.801631	2.25937e-10	1.07622e-09	S000028739	YDR524C-B
YGL138C	0.7078	0.300473	3.2451	2.7632	2.54025	2.26782e-10	1.07952e-09	S000003106	YGL138C
YIL060W	38.3627	33.5779	17.4056	19.6582	-0.95806	2.3599e-10	1.12261e-09	S000001322	YIL060W
YNL284C	281.563	283.797	162.993	178.739	-0.726423	2.39986e-10	1.14002e-09	S000005228	YNL284C	MRPL10	Mitochondrial Ribosomal Protein
YBL059W	80.6891	85.6348	50.8891	54.0797	-0.664106	2.4013e-10	1.14002e-09	S000000155	YBL059W
YDR032C	607.363	643.238	387.2	335.768	-0.790483	2.40131e-10	1.14002e-09	S000002439	YDR032C	PST2	Protoplasts-SecreTed
YJR057W	61.1539	60.32	92.7805	103.186	0.689445	2.49075e-10	1.1817e-09	S000003818	YJR057W	CDC8	Cell Division Cycle
YOL151W	50.82	59.719	87.1753	94.5803	0.717778	2.50933e-10	1.18972e-09	S000005511	YOL151W	GRE2	Genes de Respuesta a Estres (stress responsive genes)
YHR014W	3.39744	4.20662	10.1041	9.47382	1.36598	2.55779e-10	1.21189e-09	S000001056	YHR014W	SPO13	SPOrulation
YLR150W	512.376	673.585	331.296	293.373	-0.924731	2.57279e-10	1.21819e-09	S000004140	YLR150W	STM1	Suppressor of ToM1
YLR065C	60.0922	67.1557	39.3838	34.8163	-0.776794	2.6239e-10	1.24156e-09	S000004055	YLR065C	ENV10	late ENdosome and Vacuole interface function
YOR085W	101.074	104.114	66.3771	63.1588	-0.663165	2.63673e-10	1.2468e-09	S000005611	YOR085W	OST3	OligoSaccharylTransferase
YMR165C	171.925	150.988	271.261	271.109	0.747918	2.65689e-10	1.2555e-09	S000004775	YMR165C	PAH1	Phosphatidic Acid phosphoHydrolase
YEL043W	112.186	115.832	190.945	173.45	0.676569	2.68499e-10	1.26794e-09	S000000769	YEL043W
YOL076W	38.1504	44.5451	18.4381	22.8161	-1.0039	2.68861e-10	1.26881e-09	S000005436	YOL076W	MDM20	Mitochondrial Distribution and Morphology
YGL216W	34.8237	35.8314	59.6657	57.3956	0.728638	2.71658e-10	1.28116e-09	S000003184	YGL216W	KIP3	KInesin related Protein
YOR220W	252.826	261.186	406.523	463.902	0.759841	2.83287e-10	1.33512e-09	S000005746	YOR220W	RCN2	Regulator of CalciNeurin
YPR014C	5.52084	4.65733	12.0216	12.237	1.24907	2.84812e-10	1.34142e-09	S000006218	YPR014C
YGR167W	230.955	242.632	151.266	135.397	-0.723959	2.87612e-10	1.35371e-09	S000003399	YGR167W	CLC1	Clathrin Light Chain
YJL212C	73.0449	69.1088	111.956	111.081	0.649556	2.93253e-10	1.37935e-09	S000003748	YJL212C	OPT1	OligoPeptide Transporter
YCL049C	250.703	258.557	160.043	151.66	-0.708059	2.99261e-10	1.40668e-09	S000000554	YCL049C
YPR069C	84.582	104.039	56.1993	55.8166	-0.75113	3.00006e-10	1.40926e-09	S000006273	YPR069C	SPE3	SPErmidine auxotroph
YPL038W	44.5914	42.0662	25.2233	22.5793	-0.857345	3.06634e-10	1.43944e-09	S000005959	YPL038W	MET31	METhionine requiring
YMR175W	3626.2	2219.67	1217.65	1306.6	-1.21158	3.09089e-10	1.45001e-09	S000004787	YMR175W	SIP18	Salt Induced Protein
YEL074W	9.05983	7.58694	17.9956	18.0003	1.10979	3.12461e-10	1.46487e-09	S000000800	YEL074W
YKL117W	528.089	570.448	332.033	326.531	-0.738123	3.17522e-10	1.48762e-09	S000001600	YKL117W	SBA1	increased Sensitivity to Benzoquinone Ansamycins
YMR237W	143.4	152.64	98.0169	88.1855	-0.668363	3.32637e-10	1.5574e-09	S000004850	YMR237W	BCH1	Bud7 and Chs6 Homolog
YDR251W	169.306	174.349	283.135	276.162	0.702696	3.36633e-10	1.57508e-09	S000002659	YDR251W	PAM1	Pp2A Multicopy suppressor
YGL022W	408.4	382.803	248.472	222.635	-0.747882	3.3688e-10	1.5752e-09	S000002990	YGL022W	STT3	STaurosporine and Temperature sensitive
YDR505C	218.71	198.237	352.02	338.294	0.727284	3.37307e-10	1.57616e-09	S000002913	YDR505C	PSP1	Polymerase SuPpressor
YDR529C	1473.5	1402.31	807.367	880.039	-0.769186	3.38517e-10	1.58074e-09	S000002937	YDR529C	QCR7	ubiQuinol-cytochrome C oxidoReductase
YMR228W	50.8908	49.6532	28.6897	29.4478	-0.790406	3.38731e-10	1.58074e-09	S000004841	YMR228W	MTF1	Mitochondrial Transcription Factor
YOR008C	194.291	171.495	335.721	291.478	0.777865	3.55209e-10	1.65656e-09	S000005534	YOR008C	SLG1	Synthetic Lethal with Gap
YLR149C	305.274	277.637	497.681	476.691	0.741128	3.60269e-10	1.67905e-09	S000004139	YLR149C
YCR071C	119.406	124.997	74.6374	81.0801	-0.65052	3.62151e-10	1.68672e-09	S000000667	YCR071C	IMG2	Integrity of Mitochondrial Genome
YLR176C	54.7129	48.0757	80.6113	84.9486	0.686707	3.66065e-10	1.70384e-09	S000004166	YLR176C	RFX1	Regulatory Factor X
YPL118W	246.456	255.102	148.316	158.608	-0.708597	3.66887e-10	1.70655e-09	S000006039	YPL118W	MRP51	Mitochondrial Ribosomal Protein
YPR175W	45.6531	61.597	26.7721	26.8425	-0.99928	3.78812e-10	1.76087e-09	S000006379	YPR175W	DPB2	DNA Polymerase B subunit 2
YNL315C	241.643	238.576	152.815	143.292	-0.697419	3.82579e-10	1.77708e-09	S000005259	YNL315C	ATP11	ATP synthase
YPR046W	25.3392	26.9674	13.6442	13.2634	-0.957812	3.82797e-10	1.77708e-09	S000006250	YPR046W	MCM16	MiniChromosome Maintenance
YJL156C	93.9958	87.9635	137.917	147.95	0.651275	3.84351e-10	1.78313e-09	S000003692	YJL156C	SSY5	Sulfonylurea Sensitive on YPD
YMR103C	125.422	143.626	84.5939	83.2907	-0.679987	3.89045e-10	1.80373e-09	S000004709	YMR103C
YCR044C	89.6782	96.3767	56.3468	61.422	-0.65994	3.89448e-10	1.80443e-09	S000000640	YCR044C	PER1	protein Processing in the ER
YNL129W	27.3918	28.1693	13.1279	15.1581	-0.974835	3.90608e-10	1.80862e-09	S000005073	YNL129W	NRK1	Nicotinamide Riboside Kinase
YBR069C	237.467	210.331	429.607	358.584	0.815676	3.91083e-10	1.80965e-09	S000000273	YBR069C	TAT1	Tyrosine and tryptophan Amino acid Transporter
YHR072W	135.26	149.11	236.819	226.503	0.704444	3.9553e-10	1.82904e-09	S000001114	YHR072W	ERG7	ERGosterol biosynthesis
YIL076W	216.87	250.219	141.383	140.37	-0.729059	3.96155e-10	1.83074e-09	S000001338	YIL076W	SEC28	SECretory
YMR261C	187.071	203.646	125.084	119.37	-0.676269	4.06258e-10	1.87621e-09	S000004874	YMR261C	TPS3	Trehalose Phosphate Synthase
snR70	10.617	10.8921	4.86766	3.63163	-1.33283	4.13247e-10	1.90725e-09	S000006461	snR70	SNR70	Small Nucleolar RNA
YIL021W	76.6547	84.5831	51.8479	48.0007	-0.690464	4.29596e-10	1.98143e-09	S000001283	YIL021W	RPB3	RNA Polymerase B
YGR268C	81.6801	81.1277	129.73	122.686	0.632725	4.57307e-10	2.10787e-09	S000003500	YGR268C	HUA1
YNL134C	980.444	976.011	603.516	568.429	-0.739301	4.60016e-10	2.11899e-09	S000005078	YNL134C
YGL125W	77.8579	71.813	127.149	112.817	0.68102	4.66955e-10	2.14956e-09	S000003093	YGL125W	MET13	METhionine requiring
YKL035W	440.393	491.424	285.495	270.162	-0.745722	4.68518e-10	2.15537e-09	S000001518	YKL035W	UGP1	UDP-glucose pyrophosphorylase
YMR077C	76.3008	64.151	40.3425	43.2638	-0.749275	4.81103e-10	2.21183e-09	S000004682	YMR077C	VPS20	Vacuolar Protein Sorting
YPR024W	201.157	182.462	339.556	302.373	0.742696	4.83063e-10	2.21941e-09	S000006228	YPR024W	YME1	Yeast Mitochondrial Escape
YGR063C	36.5225	40.3385	18.4381	21.8687	-0.931857	4.85562e-10	2.22945e-09	S000003295	YGR063C	SPT4	SuPpressor of Ty's
YIL114C	33.762	35.0802	19.2494	18.395	-0.869895	4.88644e-10	2.241e-09	S000001376	YIL114C	POR2	PORin
YHR177W	28.1704	25.7656	50.4466	45.7901	0.835025	4.88705e-10	2.241e-09	S000001220	YHR177W		Regulator Of Fluffy
YLR015W	50.183	49.9536	77.145	80.2117	0.651761	5.02395e-10	2.30229e-09	S000004005	YLR015W	BRE2	BREfeldin A sensitivity
YOR122C	504.732	534.767	321.339	307.899	-0.724126	5.03503e-10	2.30589e-09	S000005648	YOR122C	PFY1	ProFilin of Yeast
YBR231C	71.417	68.1322	110.26	107.212	0.639883	5.09401e-10	2.3314e-09	S000000435	YBR231C	SWC5	SWr Complex
YHR091C	56.1285	53.1086	88.5766	82.896	0.650424	5.28241e-10	2.41607e-09	S000001133	YHR091C	MSR1	Mitochondrial tRNA Synthetase aRginine
YML029W	88.5457	79.9258	144.112	127.581	0.68939	5.31507e-10	2.42945e-09	S000004491	YML029W	USA1	U1-Snp1 Associating
YDR367W	56.5532	55.3621	32.2298	34.7374	-0.741389	5.39719e-10	2.46541e-09	S000002775	YDR367W	KEI1	Kex2-cleavable protein Essential for Inositol phosphorylceramide synthesis
YJR074W	77.0794	83.231	127.665	122.212	0.640712	5.40748e-10	2.46853e-09	S000003835	YJR074W	MOG1	Multicopy suppressor Of ts Gsp1
YMR272C	405.428	356.511	689.953	622.43	0.784397	5.44901e-10	2.48589e-09	S000004885	YMR272C	SCS7	Suppressor of Ca2+ Sensitivity
YFR001W	111.054	106.518	63.427	72.3958	-0.680407	5.47706e-10	2.49709e-09	S000001897	YFR001W	LOC1	LOCalization of mRNA
YDR320C-A	156.07	114.33	67.0409	78.0801	-0.898504	5.64982e-10	2.57421e-09	S000007604	YDR320C-A	DAD4	Duo1 And Dam1 interacting
YER116C	92.0847	87.5879	141.531	136.423	0.629353	5.71124e-10	2.60053e-09	S000000918	YER116C	SLX8	Synthetic Lethal of unknown (X) function
YML010W	179.993	171.946	307.105	272.767	0.720437	5.72404e-10	2.60469e-09	S000004470	YML010W	SPT5	SuPpressor of Ty's
YBR152W	17.695	16.6763	30.976	33.0005	0.895077	5.75049e-10	2.61506e-09	S000000356	YBR152W	SPP381	Suppressor of PrP38-1
YFR039C	77.7872	74.2168	126.485	113.607	0.65956	5.80863e-10	2.63981e-09	S000001935	YFR039C	OSW7	Outer Spore Wall
YHR217C	1.0617	1.35213	6.04769	3.94743	2.04995	5.83109e-10	2.64833e-09	S000001260	YHR217C
YNL274C	517.755	509.001	317.578	310.11	-0.709945	5.99362e-10	2.72042e-09	S000005218	YNL274C	GOR1	GlyOxylate Reductase
YNL282W	16.2794	16.9016	30.9022	30.632	0.891045	6.06094e-10	2.74922e-09	S000005226	YNL282W	POP3	Processing Of Precursor RNAs
YBL072C	205.616	263.74	132.975	133.897	-0.814298	6.07755e-10	2.755e-09	S000000168	YBL072C	RPS8A	Ribosomal Protein of the Small subunit
YGL175C	6.7241	7.8123	17.2581	15.0792	1.15527	6.08307e-10	2.75575e-09	S000003143	YGL175C	SAE2	Sporulation in the Absence of spo Eleven
YER175C	89.8905	83.0808	136.442	132.634	0.637229	6.22182e-10	2.81682e-09	S000000977	YER175C	TMT1	Trans-aconitate MethylTransferase
YDR296W	180.914	183.739	120.069	113.054	-0.645182	6.23966e-10	2.8231e-09	S000002704	YDR296W	MHR1	Mitochondrial Homologous Recombination
YER037W	71.7001	65.0524	106.572	108.317	0.651499	6.80426e-10	3.07659e-09	S000000839	YER037W	PHM8	PHosphate Metabolism
YMR193C-A	29.8691	25.9909	14.603	13.737	-0.978638	6.92127e-10	3.12752e-09	S000004805	YMR193C-A
YLR318W	21.871	23.0613	38.425	46.027	0.909601	6.93052e-10	3.12971e-09	S000004310	YLR318W	EST2	Ever Shorter Telomeres
YMR128W	45.1576	41.5404	67.4834	70.2642	0.667128	6.97473e-10	3.14768e-09	S000004735	YMR128W	ECM16	ExtraCellular Mutant
YLR236C	1.84028	1.72772	6.1952	5.3685	1.69206	7.13177e-10	3.21652e-09	S000004226	YLR236C
YNL269W	3.25588	3.45544	8.77653	8.60539	1.3716	7.43739e-10	3.35224e-09	S000005213	YNL269W	BSC4	Bypass of Stop Codon
YPR146C	14.2976	12.695	6.04769	5.84219	-1.18203	7.49247e-10	3.37493e-09	S000006350	YPR146C
YMR120C	280.076	353.506	185.635	175.187	-0.812004	7.57205e-10	3.40862e-09	S000004727	YMR120C	ADE17	ADEnine
YMR019W	58.1811	55.1368	96.8368	84.396	0.677641	7.87054e-10	3.54075e-09	S000004621	YMR019W	STB4	Sin Three Binding protein
YML058W	521.861	502.691	302.532	321.873	-0.714497	8.38377e-10	3.76926e-09	S000004523	YML058W	SML1	Suppressor of Mec1 Lethality
YLR285W	44.7329	54.3856	23.3795	28.1057	-0.945275	8.59742e-10	3.86287e-09	S000004275	YLR285W	NNT1	Nicotinamide N-methylTransferase
YOR346W	46.1485	46.0475	70.4335	73.5011	0.642298	8.91141e-10	4.00143e-09	S000005873	YOR346W	REV1	REVersionless
YER023W	183.249	212.66	126.707	111.396	-0.733073	9.13038e-10	4.09717e-09	S000000825	YER023W	PRO3	PROline requiring
YDR322W	222.603	230.162	145.44	139.818	-0.666332	9.2317e-10	4.14003e-09	S000002730	YDR322W	MRPL35	Mitochondrial Ribosomal Protein
YDL154W	71.417	69.0337	45.1364	44.8428	-0.642396	9.46662e-10	4.24271e-09	S000002313	YDL154W	MSH5	MutS Homolog
YIL035C	129.032	139.72	83.5614	88.896	-0.640044	9.67874e-10	4.33475e-09	S000001297	YIL035C	CKA1	Casein Kinase Alpha subunit
YGR199W	79.132	76.245	119.921	118.344	0.61663	9.68414e-10	4.33475e-09	S000003431	YGR199W	PMT6	Protein O-MannosylTransferase
YBL105C	180.135	149.26	272.736	286.425	0.763131	1.00632e-09	4.50161e-09	S000000201	YBL105C	PKC1	Protein Kinase C
YOR260W	108.081	120.94	71.6873	74.1327	-0.651087	1.03899e-09	4.64484e-09	S000005786	YOR260W	GCD1	General Control Derepressed
YML065W	48.1304	46.4982	74.0474	72.9484	0.635194	1.04662e-09	4.67601e-09	S000004530	YML065W	ORC1	Origin Recognition Complex
YGL240W	10.4047	10.2161	22.7157	19.5792	1.03663	1.08049e-09	4.8243e-09	S000003209	YGL240W	DOC1	Destruction Of Cyclin B
YGL037C	886.944	958.509	574.531	527.692	-0.743489	1.08851e-09	4.85707e-09	S000003005	YGL037C	PNC1	Pyrazinamidase and NiCotinamidase
YOR029W	3.82212	3.23008	8.40777	10.0265	1.37966	1.11654e-09	4.97903e-09	S000005555	YOR029W
YGR013W	91.1646	80.1512	134.377	134.765	0.651227	1.12005e-09	4.99155e-09	S000003245	YGR013W	SNU71	Small NUclear ribonucleoprotein associated
YPL057C	304.141	264.116	460.657	497.613	0.753721	1.12488e-09	5.00994e-09	S000005978	YPL057C	SUR1	SUppressor of Rvs161 and rvs167 mutations
YMR032W	17.6242	11.7936	31.9348	33.9479	1.16022	1.13283e-09	5.04218e-09	S000004635	YMR032W	HOF1	Homolog Of cdc Fifteen
YMR294W-A	30.9308	28.2445	49.7091	52.106	0.781886	1.14405e-09	5.08895e-09	S000004909	YMR294W-A
YHR052W	60.5876	73.7661	39.1625	39.7901	-0.766296	1.14869e-09	5.10639e-09	S000001094	YHR052W	CIC1	Core Interacting Component
YMR196W	269.884	257.956	448.857	414.085	0.709156	1.16638e-09	5.18179e-09	S000004809	YMR196W
YMR256C	1060.92	661.867	361.46	415.98	-1.14801	1.17466e-09	5.21535e-09	S000004869	YMR256C	COX7	Cytochrome c OXidase
YBR040W	0.49546	0.450709	3.46636	2.21056	2.56619	1.17864e-09	5.22976e-09	S000000244	YBR040W	FIG1	Factor-Induced Gene
YER030W	514.712	404.887	237.556	271.267	-0.854008	1.19486e-09	5.29842e-09	S000000832	YER030W	CHZ1	Chaperone for Htz1/H2A-H2B dimer
YPR088C	231.734	236.172	150.529	143.765	-0.668804	1.23241e-09	5.46153e-09	S000006292	YPR088C	SRP54	Signal Recognition Particle 54-kD subunit
YDL111C	48.7674	58.0664	31.566	27.0004	-0.865489	1.25503e-09	5.55588e-09	S000002269	YDL111C	RRP42	Ribosomal RNA Processing
YML069W	168.386	186.293	275.981	308.057	0.719546	1.25526e-09	5.55588e-09	S000004534	YML069W	POB3	POl1 Binding
YIL175W	1.69872	1.27701	4.94141	5.2106	1.75847	1.31393e-09	5.81197e-09	S000001437	YIL175W
YGR238C	72.8326	69.6346	107.383	112.739	0.627253	1.31752e-09	5.82423e-09	S000003470	YGR238C	KEL2	KELch repeat
YDR160W	125.422	110.574	186.225	188.529	0.666833	1.33634e-09	5.90375e-09	S000002567	YDR160W	SSY1	Sulfonylurea Sensitive on YPD
YGL150C	170.438	151.213	268.827	258.162	0.712113	1.35078e-09	5.96384e-09	S000003118	YGL150C	INO80	INOsitol requiring
YDL158C	13.2359	13.5213	5.67893	6.39483	-1.14839	1.35429e-09	5.97565e-09	S000002317	YDL158C
YML083C	35.1776	29.0708	53.323	60.5535	0.824061	1.36729e-09	6.02929e-09	S000004548	YML083C
YDR462W	150.549	153.617	102.368	97.1856	-0.607792	1.37838e-09	6.0744e-09	S000002870	YDR462W	MRPL28	Mitochondrial Ribosomal Protein
YBR054W	750.551	567.293	1317.95	1157.39	0.909395	1.40363e-09	6.18187e-09	S000000258	YBR054W	YRO2
YGL041C-B	39.1413	37.7845	16.078	22.0266	-1.0154	1.41458e-09	6.22627e-09	S000028548	YGL041C-B
YGL076C	289.844	393.77	195.739	156.239	-0.957341	1.45452e-09	6.39465e-09	S000003044	YGL076C	RPL7A	Ribosomal Protein of the Large subunit
snR43	14.5099	7.66206	3.17135	2.4474	-1.9762	1.45464e-09	6.39465e-09	S000006503	snR43	SNR43	Small Nucleolar RNA
YBR239C	70.5676	65.6533	41.0801	44.7638	-0.666952	1.49509e-09	6.56845e-09	S000000443	YBR239C	ERT1	Ethanol Regulated Transcription factor
YHR062C	38.3627	43.7188	22.7157	22.8951	-0.846906	1.503e-09	6.59915e-09	S000001104	YHR062C	RPP1	Ribonuclease P Protein
YKL100C	241.855	233.317	402.762	369.242	0.700165	1.60898e-09	7.06008e-09	S000001583	YKL100C	YPF1	Yeast Presenilin-like Family 1
YDR368W	135.402	155.044	92.4855	92.1329	-0.65339	1.61012e-09	7.06075e-09	S000002776	YDR368W	YPR1	Yeast Putative Reductase
YOL121C	305.557	395.498	207.687	175.976	-0.869376	1.62264e-09	7.11128e-09	S000005481	YOL121C	RPS19A	Ribosomal Protein of the Small subunit
YPL081W	160.458	226.857	99.0494	108.554	-0.899503	1.6257e-09	7.12031e-09	S000006002	YPL081W	RPS9A	Ribosomal Protein of the Small subunit
YLR379W	8.98905	9.23954	18.4381	18.3161	1.01132	1.6315e-09	7.14132e-09	S000004371	YLR379W
YDL087C	15.7839	18.1035	33.7786	30.3952	0.922509	1.65676e-09	7.24489e-09	S000002245	YDL087C	LUC7	Lethal Unless Cap-binding complex is produced
YML009C-A	7.50268	6.1597	14.308	16.1055	1.15023	1.65719e-09	7.24489e-09	S000004469	YML009C-A
YHL036W	33.4789	32.0755	53.7655	54.3955	0.721911	1.669e-09	7.29204e-09	S000001028	YHL036W	MUP3	Methionine UPtake
YDR144C	42.3264	47.7001	26.6984	23.6846	-0.835798	1.74783e-09	7.63175e-09	S000002551	YDR144C	MKC7	Multicopy suppressor of Kex2 Cold sensitivity
YBR065C	35.7439	27.6435	54.2817	61.8956	0.872229	1.82468e-09	7.96243e-09	S000000269	YBR065C	ECM2	ExtraCellular Mutant
YIL135C	116.15	105.691	189.101	166.029	0.678788	1.82891e-09	7.97603e-09	S000001397	YIL135C	VHS2	Viable in a Hal3 Sit4 background
YNR066C	19.8892	17.803	33.1148	42.2375	0.997385	1.87734e-09	8.18223e-09	S000005349	YNR066C
YDL123W	96.6146	83.6066	146.472	138.16	0.658986	1.89891e-09	8.27117e-09	S000002281	YDL123W	SNA4	Sensitivity to NA+
YGR264C	115.017	140.471	78.915	77.9222	-0.703497	1.9814e-09	8.62522e-09	S000003496	YGR264C	MES1	MEthionyl-tRNA Synthetase
YCR006C	6.51176	6.53529	16.078	13.1844	1.16588	1.99114e-09	8.6623e-09	S000000599	YCR006C
YHR001W-A	634.472	549.265	326.87	367.348	-0.77	2.04356e-09	8.88495e-09	S000003529	YHR001W-A	QCR10	ubiQuinol-cytochrome C oxidoReductase
YOR206W	85.0067	97.2781	59.3706	55.7377	-0.662369	2.07658e-09	9.02299e-09	S000005732	YOR206W	NOC2	NucleOlar Complex associated
YNR014W	18.5443	20.0566	34.6636	34.5005	0.841734	2.08045e-09	9.0343e-09	S000005297	YNR014W
YOR099W	192.946	181.486	294.346	301.031	0.668963	2.11217e-09	9.16645e-09	S000005625	YOR099W	KTR1	Kre Two Related
YNL116W	73.1157	62.6486	115.939	103.896	0.695005	2.18898e-09	9.49403e-09	S000005060	YNL116W	DMA2	Defective in Mitotic Arrest
YOR331C	117.282	125.673	79.3575	79.6591	-0.611287	2.21273e-09	9.59117e-09	S000005858	YOR331C
YIL074C	106.311	133.56	72.2036	72.2379	-0.731278	2.23903e-09	9.6993e-09	S000001336	YIL074C	SER33	SERine requiring
YBR171W	64.0559	74.3671	42.3339	43.5006	-0.688952	2.3472e-09	1.01617e-08	S000000375	YBR171W	SEC66	SECretory
YER044C	278.731	284.398	158.789	184.266	-0.715214	2.40197e-09	1.03925e-08	S000000846	YER044C	ERG28	ERGosterol biosynthesis
YDR486C	142.48	154.894	96.6893	98.0541	-0.610527	2.4035e-09	1.03928e-08	S000002894	YDR486C	VPS60	Vacuolar Protein Sorting
YHR026W	236.759	211.758	145.145	133.502	-0.686641	2.44147e-09	1.05506e-08	S000001068	YHR026W	VMA16	Vacuolar Membrane Atpase
YER044C-A	4.67148	3.60568	9.4403	13.1055	1.4383	2.4927e-09	1.07629e-08	S000001954	YER044C-A	MEI4	MEIosis-specific
YHR050W-A	56.7655	63.3998	28.5422	37.5795	-0.862817	2.49362e-09	1.07629e-08	S000028832	YHR050W-A
YCR013C	95.4822	114.706	67.1884	57.3166	-0.754417	2.51979e-09	1.08692e-08	S000000606	YCR013C
YGL146C	60.8	58.6673	97.5744	87.475	0.631473	2.53446e-09	1.09259e-08	S000003114	YGL146C	RRT6	Regulator of rDNA Transcription
YGL159W	53.0142	54.9114	30.7547	33.9479	-0.738555	2.56144e-09	1.10356e-08	S000003127	YGL159W
YPL170W	186.505	197.861	124.568	123.949	-0.628995	2.59028e-09	1.11531e-08	S000006091	YPL170W	DAP1	DAmage resistance Protein
YLR247C	143.4	141.072	213.439	249.004	0.700733	2.63122e-09	1.13225e-08	S000004237	YLR247C	IRC20	Increased Recombination Centers
YGL184C	39.0705	30.498	63.0583	58.9746	0.80965	2.65742e-09	1.14283e-08	S000003152	YGL184C	STR3	Sulfur TRansfer
YPL129W	124.997	134.612	85.9952	83.8433	-0.611834	2.68047e-09	1.15205e-08	S000006050	YPL129W	TAF14	TATA binding protein-Associated Factor
YKL038W	212.623	197.636	343.538	317.057	0.687193	2.72105e-09	1.16879e-08	S000001521	YKL038W	RGT1	Restores Glucose Transport
YOR303W	265.354	236.848	416.406	401.769	0.704041	2.75051e-09	1.18073e-08	S000005829	YOR303W	CPA1	Carbamyl Phosphate synthetase A
YDR374C	6.58254	4.73245	12.4641	16.1055	1.32995	2.75658e-09	1.18262e-08	S000002782	YDR374C	PHO92	PHOsphate metabolism
YGL002W	119.972	109.748	73.0148	76.1064	-0.623756	2.77032e-09	1.1878e-08	S000002970	YGL002W	ERP6	Emp24p/Erv25p Related Protein
YMR145C	1059.01	1112.35	684.348	637.825	-0.715641	2.79215e-09	1.19644e-08	S000004753	YMR145C	NDE1	NADH Dehydrogenase
YOR063W	1348.57	1855.72	874.113	826.907	-0.913559	2.8522e-09	1.22144e-08	S000005589	YOR063W	RPL3	Ribosomal Protein of the Large subunit
YIL087C	360.907	350.952	230.107	214.74	-0.678187	2.85428e-09	1.2216e-08	S000001349	YIL087C	AIM19	Altered Inheritance rate of Mitochondria
YLR066W	88.5457	92.5457	54.5767	61.7378	-0.639144	2.86001e-09	1.22332e-08	S000004056	YLR066W	SPC3	Signal Peptidase Complex
YER001W	187.708	182.387	124.273	113.923	-0.635513	2.88188e-09	1.23193e-08	S000000803	YER001W	MNN1	MaNNosyltransferase
YLR275W	62.3571	47.3245	23.3057	30.632	-1.02556	2.9084e-09	1.24252e-08	S000004265	YLR275W	SMD2
YNL024C-A	116.362	91.494	58.8544	63.3167	-0.767331	2.94573e-09	1.25772e-08	S000028698	YNL024C-A	KSH1	KSH (similar to the Hungarian word for "small")
YOR201C	70.0014	73.6159	120.585	105.791	0.656986	2.9677e-09	1.26634e-08	S000005727	YOR201C	MRM1	Mitochondrial rRNA Methyltransferase
YDR386W	44.6622	41.6155	64.8283	71.4484	0.658481	3.04232e-09	1.2974e-08	S000002794	YDR386W	MUS81	MMS and UV Sensitive
YNL244C	421.636	431.629	243.309	277.978	-0.711023	3.14936e-09	1.34225e-08	S000005188	YNL244C	SUI1	SUppressor of Initiator codon
YGL020C	130.872	123.344	83.1189	84.396	-0.601932	3.17704e-09	1.35323e-08	S000002988	YGL020C	GET1	Guided Entry of Tail-anchored proteins
YNL257C	82.8833	88.3391	54.1342	57.3166	-0.619494	3.25363e-09	1.38503e-08	S000005201	YNL257C	SIP3	SNF1-Interacting Protein
YML102W	51.9525	62.6486	97.7219	88.2645	0.699541	3.27869e-09	1.39486e-08	S000004570	YML102W	CAC2	Chromatin Assembly Complex
YLR445W	0.849359	0.600946	2.72884	4.65796	2.32201	3.28987e-09	1.39878e-08	S000004437	YLR445W	GMC2	Grand Meiotic recombination Cluster
Q0110	0.21234	0.0751182	1.32754	2.36846	3.57341	3.30099e-09	1.40267e-08	S000007271	Q0110	BI2
YIR027C	36.4517	29.9722	63.5745	54.0008	0.823279	3.34977e-09	1.42256e-08	S000001466	YIR027C	DAL1	Degradation of Allantoin
YLR224W	47.8472	52.2072	76.1862	79.5801	0.638773	3.35815e-09	1.42526e-08	S000004214	YLR224W	UCC1	Ubiquitination of Citrate synthase in the glyoxylate Cycle
YNL268W	292.392	273.43	498.418	436.191	0.724019	3.41885e-09	1.45016e-08	S000005212	YNL268W	LYP1	LYsine-specific Permease
YJR025C	120.326	121.842	82.7501	67.3431	-0.689293	3.50666e-09	1.48652e-08	S000003786	YJR025C	BNA1	Biosynthesis of Nicotinic Acid
YBR222C	701.925	674.186	1244.28	1071.25	0.750756	3.51703e-09	1.49003e-08	S000000426	YBR222C	PCS60	Peroxisomal CoA-dependent Synthetase
snR46	17.3411	11.1926	4.27764	5.60535	-1.53239	3.52103e-09	1.49084e-08	S000006506	snR46	SNR46	Small Nucleolar RNA
YNL063W	92.0847	100.658	55.978	65.0536	-0.671691	3.56235e-09	1.50744e-08	S000005007	YNL063W	MTQ1	Methyltransferase
YPL085W	169.164	154.143	259.313	256.346	0.673354	3.57796e-09	1.51315e-08	S000006006	YPL085W	SEC16	SECretory
YJR157W	3.04354	2.40378	6.93272	7.89485	1.43642	3.68439e-09	1.55723e-08	S000003918	YJR157W
YDR119W-A	884.254	783.258	1377.92	1392.34	0.732281	3.72781e-09	1.57407e-08	S000113555	YDR119W-A	COX26
YIL062C	194.716	201.843	132.164	123.712	-0.631823	3.72864e-09	1.57407e-08	S000001324	YIL062C	ARC15	ARp2/3 Complex subunit
YKL193C	159.609	163.232	102.811	110.449	-0.598371	3.82864e-09	1.61533e-08	S000001676	YKL193C	SDS22	homolog of S. pombe SDS22
YLR119W	76.7963	71.8882	39.9738	49.8165	-0.728895	3.8592e-09	1.62726e-08	S000004109	YLR119W	SRN2	Suppressor of Rna mutations
YJR053W	10.7586	11.8687	22.937	21.1582	0.963537	3.96324e-09	1.67014e-08	S000003814	YJR053W	BFA1	Byr-Four-Alike
YBR244W	26.6133	29.6717	13.1279	15.7897	-0.961513	4.02946e-09	1.69704e-08	S000000448	YBR244W	GPX2	Glutathione PeroXidase
YPR107C	45.5115	45.747	27.5096	26.3688	-0.75968	4.03547e-09	1.69857e-08	S000006311	YPR107C	YTH1	Yeast THirty kDa Homolog
YJR060W	81.043	75.1182	117.856	119.528	0.603791	4.05978e-09	1.70779e-08	S000003821	YJR060W	CBF1	Centromere Binding Factor
YLR099C	65.9669	76.0197	113.431	109.028	0.648356	4.11465e-09	1.72985e-08	S000004089	YLR099C	ICT1	Increased Copper Tolerance
YEL025C	82.3171	85.4094	128.034	124.66	0.591447	4.24794e-09	1.78484e-08	S000000751	YEL025C
YIL156W-A	13.4482	15.6997	6.41645	6.94747	-1.12388	4.26457e-09	1.79077e-08	S000028797	YIL156W-A
YHL007C	84.5113	83.832	135.409	122.37	0.614936	4.35851e-09	1.82914e-08	S000000999	YHL007C	STE20	STErile
YGR203W	48.6966	55.2119	31.9348	26.132	-0.837667	4.41842e-09	1.85319e-08	S000003435	YGR203W	YCH1	Yeast Cdc25 Homologue
YIL030C	119.406	103.813	185.045	168.95	0.665068	4.43936e-09	1.86088e-08	S000001292	YIL030C	SSM4	Suppressor of mrna Stability Mutant
YLR387C	135.331	142.424	93.0755	91.0277	-0.593041	4.59829e-09	1.92636e-08	S000004379	YLR387C	REH1	REI1 Homologue
YOR196C	181.126	182.688	300.172	275.294	0.661609	4.61651e-09	1.93286e-08	S000005722	YOR196C	LIP5	LIPoic acid
YAL064W	1.20326	0.676064	3.2451	5.2106	2.14458	4.71722e-09	1.97386e-08	S000000060	YAL064W
YMR224C	33.8328	36.8079	55.5355	59.2114	0.69993	4.72654e-09	1.9766e-08	S000004837	YMR224C	MRE11	Meiotic REcombination
YOR256C	120.467	104.94	175.899	175.976	0.642159	4.81431e-09	2.01213e-08	S000005782	YOR256C	TRE2	Transferrrin REceptor like
YDR322C-A	1058.94	746.15	469.065	484.349	-0.920943	4.83274e-09	2.01865e-08	S000007255	YDR322C-A	TIM11	Translocase of the Inner Mitochondrial membrane
YKL103C	316.103	341.863	215.799	180.95	-0.729486	4.86669e-09	2.03164e-08	S000001586	YKL103C	APE1	AminoPeptidase
YBL046W	70.5676	60.6204	102.368	104.686	0.657648	4.89439e-09	2.042e-08	S000000142	YBL046W	PSY4	Platinum SensitivitY
YKL063C	86.3515	79.8507	53.4705	55.1061	-0.614621	4.94104e-09	2.06026e-08	S000001546	YKL063C
YOR198C	277.528	364.774	169.409	191.529	-0.83146	4.95684e-09	2.06564e-08	S000005724	YOR198C	BFR1	BreFeldin A Resistance
YAR075W	0.21234	0.375591	2.28632	2.05266	2.85771	5.14834e-09	2.14419e-08	S000002145	YAR075W
YGL248W	342.363	340.286	532.566	557.771	0.675516	5.20424e-09	2.1662e-08	S000003217	YGL248W	PDE1	PhosphoDiEsterase
YDR419W	57.1194	52.5077	86.1427	82.0275	0.617014	5.28027e-09	2.19657e-08	S000002827	YDR419W	RAD30	RADiation sensitive
YJR023C	4.52992	4.65733	0.811276	1.73687	-1.85659	5.28474e-09	2.19714e-08	S000003784	YJR023C
YDR331W	67.0994	61.8223	38.9412	42.1585	-0.669486	5.3137e-09	2.2079e-08	S000002739	YDR331W	GPI8	GlycosylPhosphatidylInositol anchor biosynthesis
YNL065W	16.7748	15.6246	33.5573	28.1057	0.928491	5.32834e-09	2.21269e-08	S000005009	YNL065W	AQR1	Acids Quinidine Resistance
YDL142C	68.3734	67.0055	45.6527	41.6059	-0.632949	5.42062e-09	2.2497e-08	S000002301	YDL142C	CRD1	CaRDiolipin synthase
YER146W	8.49359	9.38978	2.87634	4.10532	-1.35941	5.56472e-09	2.30816e-08	S000000948	YER146W	LSM5	Like SM
YFR056C	7.078	9.01419	2.58133	3.31584	-1.44733	5.59735e-09	2.32034e-08	S000001951	YFR056C
YJL078C	986.036	950.922	624.904	515.613	-0.764026	5.70247e-09	2.36255e-08	S000003614	YJL078C	PRY3	Pathogen Related in Yeast
YMR173W	56.9071	64.0759	90.6416	97.7383	0.639007	5.74187e-09	2.37644e-08	S000004784	YMR173W	DDR48	DNA Damage Responsive
YBR251W	139.861	140.772	96.3206	89.3697	-0.595428	5.74267e-09	2.37644e-08	S000000455	YBR251W	MRPS5	Mitochondrial Ribosomal Protein
YOL131W	4.6007	4.65733	9.80906	13.2634	1.31334	5.81347e-09	2.40434e-08	S000005491	YOL131W
YOR079C	25.9762	27.1928	14.0129	14.8423	-0.881657	5.8873e-09	2.43346e-08	S000005605	YOR079C	ATX2	AnTioXidant
YPL033C	2.33574	1.80284	5.45767	6.86852	1.56345	5.89478e-09	2.43514e-08	S000005954	YPL033C	SRL4	Suppressor of Rad53 null Lethality or Suppressor of Rad53 and Lcd1
YDR506C	38.0088	37.2586	64.2383	57.1587	0.689943	5.95556e-09	2.45883e-08	S000002914	YDR506C	GMC1	Grand Meiotic recombination Cluster
YDL160C-A	36.3101	29.7468	15.4142	18.2371	-0.974723	5.97832e-09	2.46679e-08	S000028520	YDL160C-A	MHF2	Mph1-associated Histone-Fold protein
YJL095W	43.2466	44.8456	69.106	66.1589	0.619054	6.03587e-09	2.4891e-08	S000003631	YJL095W	BCK1	Bypass of C Kinase
YML018C	52.2356	52.8832	33.4098	28.2636	-0.767935	6.22438e-09	2.56535e-08	S000004480	YML018C
YLL035W	16.4209	19.7561	32.2298	34.8163	0.890638	6.3655e-09	2.622e-08	S000003958	YLL035W	GRC3
YMR092C	208.659	221.373	143.227	132.555	-0.640632	6.42172e-09	2.64363e-08	S000004698	YMR092C	AIP1	Actin Interacting Protein
YDL048C	401.11	318.652	221.773	184.582	-0.82468	6.43712e-09	2.64843e-08	S000002206	YDL048C	STP4	protein with similarity to Stp1p
YER114C	102.065	98.1044	152.962	146.765	0.582373	6.46674e-09	2.65909e-08	S000000916	YER114C	BOI2	Bem1 (One) Interacting protein
YMR119W	87.6256	79.0244	123.019	133.818	0.623404	6.50348e-09	2.67265e-08	S000004725	YMR119W	ASI1	Amino acid Sensor-Independent
YAL026C-A	14.0852	12.8452	6.63771	5.84219	-1.10742	6.57429e-09	2.7002e-08	S000028730	YAL026C-A
YOL070C	70.0014	63.3247	108.563	99.3173	0.640618	6.59749e-09	2.70816e-08	S000005431	YOL070C	NBA1	Nap1p and Bud neck Associated
YER129W	116.645	116.809	176.711	175.818	0.594578	6.71503e-09	2.75482e-08	S000000931	YER129W	SAK1	Snf1 Activating Kinase
YLR457C	32.7711	34.329	51.9217	59.2114	0.727393	6.86856e-09	2.81619e-08	S000004449	YLR457C	NBP1	Nap1 Binding Protein
YNL187W	22.7204	22.235	39.2363	37.8953	0.778627	6.89673e-09	2.82611e-08	S000005131	YNL187W	SWT21	Synthetic With Tgs1
YMR017W	14.4391	12.7701	24.3383	28.8952	0.965792	6.92213e-09	2.83489e-08	S000004619	YMR017W	SPO20	SPOrulation
YDR469W	126.838	98.2547	57.4531	70.3431	-0.81757	6.99464e-09	2.86294e-08	S000002877	YDR469W	SDC1	Set1c
YER073W	150.478	148.509	277.825	223.424	0.745601	7.06415e-09	2.88973e-08	S000000875	YER073W	ALD5	ALdehyde Dehydrogenase
YIR037W	407.409	434.409	266.246	265.346	-0.663128	7.15285e-09	2.92434e-08	S000001476	YIR037W	HYR1	HYdroperoxide Resistance
YGR187C	43.9544	56.2636	26.8459	27.7109	-0.876525	7.2679e-09	2.96967e-08	S000003419	YGR187C	HGH1	HmG1/2 Homolog
YAL064W-B	2.05262	1.80284	6.56396	5.05271	1.58772	7.29772e-09	2.98015e-08	S000002141	YAL064W-B
YMR060C	86.6347	83.3813	55.7568	57.0798	-0.59165	7.38507e-09	3.01409e-08	S000004664	YMR060C	SAM37	Sorting and Assembly Machinery
YJR027W	3.32666	2.70426	8.33402	7.34221	1.37382	7.43355e-09	3.03214e-08	S000003788	YJR027W
YGR219W	8.35203	8.93907	3.0976	3.86848	-1.31237	7.66754e-09	3.12579e-08	S000003451	YGR219W
YBL090W	183.886	162.18	108.342	114.396	-0.636009	7.82534e-09	3.1883e-08	S000000186	YBL090W	MRP21	Mitochondrial Ribosomal Protein
YKL045W	91.4477	107.795	65.0496	58.0272	-0.694013	7.83494e-09	3.19039e-08	S000001528	YKL045W	PRI2	DNA PRImase
YOR241W	87.2717	91.9447	60.0344	59.2114	-0.587413	7.88089e-09	3.20726e-08	S000005767	YOR241W	MET7	METhionine requiring
YLL049W	53.3681	55.2119	28.1734	34.8953	-0.784823	8.12911e-09	3.30639e-08	S000003972	YLL049W	LDB18	Low Dye Binding
YFR032C	0.42468	0.676064	2.72884	2.9211	2.34796	8.20351e-09	3.33475e-08	S000001928	YFR032C	RRT5	Regulator of rDNA Transcription
YOR113W	97.9595	90.6677	143.153	140.844	0.590087	8.43346e-09	3.42627e-08	S000005639	YOR113W	AZF1	Asparagine-rich Zinc-Finger
YER039C	10.6878	14.2725	26.5508	24.3951	1.0314	8.47848e-09	3.4426e-08	S000000841	YER039C	HVG1	Homologous to VRG4
YNR059W	28.2412	29.8219	49.3403	47.3691	0.736419	8.75128e-09	3.55135e-08	S000005342	YNR059W	MNT4	MaNnosylTransferase
YER101C	60.2337	62.4984	90.5679	92.7645	0.578959	8.9781e-09	3.64132e-08	S000000903	YER101C	AST2	ATPase STabilizing
YBR072W	3500.49	3645.49	5976.15	5668.82	0.704507	9.06725e-09	3.67538e-08	S000000276	YBR072W	HSP26	Heat Shock Protein
YKR041W	1.13248	1.20189	5.08891	3.55268	1.88546	9.09299e-09	3.68372e-08	S000001749	YKR041W
YGL207W	277.528	313.018	182.685	189.082	-0.667579	9.22046e-09	3.73324e-08	S000003175	YGL207W	SPT16	SuPpressor of Ty
YLR075W	937.834	1237.65	619.889	603.798	-0.830043	9.31099e-09	3.76775e-08	S000004065	YLR075W	RPL10	Ribosomal Protein of the Large subunit
YDR147W	25.6931	28.5449	44.0302	49.8165	0.790846	9.39588e-09	3.79995e-08	S000002554	YDR147W	EKI1	Ethanolamine KInase
YIL008W	65.3299	62.1228	37.0237	42.7901	-0.676287	9.51444e-09	3.84571e-08	S000001270	YIL008W	URM1	Ubiquitin Related Modifier
YNL312W	115.301	131.532	82.0864	78.0011	-0.624105	9.53686e-09	3.85259e-08	S000005256	YNL312W	RFA2	Replication Factor A
YOL058W	141.348	133.034	237.409	202.187	0.680061	9.58275e-09	3.86893e-08	S000005419	YOL058W	ARG1	ARGinine requiring
YER052C	94.8451	108.471	165.353	149.844	0.633038	9.60418e-09	3.87539e-08	S000000854	YER052C	HOM3	HOMoserine requiring
YBL084C	86.9178	82.3296	126.19	126.87	0.580081	9.63877e-09	3.88715e-08	S000000180	YBL084C	CDC27	Cell Division Cycle
YOL086C	1591.56	1869.69	1081.14	879.408	-0.819979	1.00751e-08	4.06082e-08	S000005446	YOL086C	ADH1	Alcohol DeHydrogenase
YLR008C	82.3171	92.3203	49.0453	59.2114	-0.690403	1.01374e-08	4.08361e-08	S000003998	YLR008C	PAM18	Presequence translocase-Associated Motor
YBR026C	491.85	492.701	796.968	768.327	0.668902	1.03226e-08	4.15588e-08	S000000230	YBR026C	ETR1	2-Enoyl Thioester Reductase
YLR341W	20.1723	17.9533	8.85028	10.1844	-1.00382	1.06619e-08	4.29006e-08	S000004333	YLR341W	SPO77	SPOrulation
YJR120W	23.9944	24.4885	39.4575	43.5006	0.774278	1.08669e-08	4.37008e-08	S000003881	YJR120W
YLR244C	112.823	132.058	76.9237	80.3696	-0.638386	1.11444e-08	4.47914e-08	S000004234	YLR244C	MAP1	Methionine AminoPeptidase
YKL096W-A	941.94	1068.26	635.082	585.719	-0.719441	1.1155e-08	4.48088e-08	S000001956	YKL096W-A	CWP2	Cell Wall Protein
YDR311W	66.8871	64.3763	97.5744	101.291	0.598952	1.12016e-08	4.49703e-08	S000002719	YDR311W	TFB1	Transcription Factor B
YOR021C	154.725	146.405	102.737	99.2383	-0.576158	1.12146e-08	4.49972e-08	S000005547	YOR021C	SFM1	Spout Family Methyltransferase 1
YPR199C	105.674	99.9824	66.3771	69.3168	-0.600199	1.12563e-08	4.51393e-08	S000006403	YPR199C	ARR1	ARsenicals Resistance
YDR090C	103.41	82.8554	152.372	147.239	0.685217	1.12868e-08	4.52361e-08	S000002497	YDR090C
YGR244C	527.028	511.405	924.633	788.222	0.72202	1.18921e-08	4.76351e-08	S000003476	YGR244C	LSC2	Ligase of Succinyl-CoA
YBR210W	65.8254	60.7707	37.7612	42.1585	-0.664554	1.20151e-08	4.80996e-08	S000000414	YBR210W	ERV15	ER Vesicle Protein
YGR247W	61.2954	58.8176	38.4987	38.4479	-0.642514	1.20215e-08	4.80996e-08	S000003479	YGR247W	CPD1	Cyclic nucleotide PhosphoDiesterase
YKL030W	11.4664	12.8452	5.23642	5.84219	-1.13319	1.20731e-08	4.82787e-08	S000001513	YKL030W
YNL139C	68.515	64.6017	99.5657	102.002	0.59816	1.22303e-08	4.88801e-08	S000005083	YNL139C	THO2	suppressor of the Transcriptional defect of Hpr1 by Overexpression
YBL029C-A	132.005	124.095	73.7524	88.896	-0.655672	1.22496e-08	4.89298e-08	S000007591	YBL029C-A
YFR007W	60.0922	62.874	40.49	37.6584	-0.653136	1.25842e-08	5.02381e-08	S000001903	YFR007W	YFH7
YKL007W	167.041	173.974	112.694	114.554	-0.585503	1.29178e-08	5.15409e-08	S000001490	YKL007W	CAP1	CAPping
YMR304W	132.005	124.095	199.205	191.055	0.607633	1.29993e-08	5.18373e-08	S000004920	YMR304W	UBP15	UBiquitin-specific Protease
YJR159W	1.69872	2.17843	5.53143	5.76324	1.54158	1.3094e-08	5.21856e-08	S000003920	YJR159W	SOR1
YGL117W	94.8451	76.6206	137.917	135.16	0.670801	1.32683e-08	5.28509e-08	S000003085	YGL117W
YGL013C	73.7527	74.6675	107.088	116.133	0.588505	1.33159e-08	5.30106e-08	S000002981	YGL013C	PDR1	Pleiotropic Drug Resistance
YBR083W	73.8235	69.7848	106.72	108.554	0.583677	1.41406e-08	5.62624e-08	S000000287	YBR083W	TEC1	Transposon Enhancement Control
YMR056C	251.552	221.824	417.438	361.111	0.717762	1.41893e-08	5.64246e-08	S000004660	YMR056C	AAC1	ADP/ATP Carrier
YOL038W	247.234	291.985	172.212	156.16	-0.715235	1.51035e-08	6.00265e-08	S000005398	YOL038W	PRE6	PRoteinase yscE
YMR308C	135.898	163.232	95.0668	96.3962	-0.64338	1.52809e-08	6.06915e-08	S000004925	YMR308C	PSE1	Protein Secretion Enhancer
YGL172W	108.081	113.353	76.7024	66.8694	-0.62433	1.52879e-08	6.06915e-08	S000003140	YGL172W	NUP49	NUclear Pore
YCR065W	47.8472	56.3387	32.2298	26.7636	-0.818708	1.56599e-08	6.2134e-08	S000000661	YCR065W	HCM1	High-Copy suppressor of Calmodulin
YDR304C	239.519	238.951	159.748	148.581	-0.633788	1.59899e-08	6.34079e-08	S000002712	YDR304C	CPR5	Cyclosporin-sensitive Proline Rotamase
YBR051W	70.9215	59.0429	37.3187	41.5269	-0.72209	1.61288e-08	6.39232e-08	S000000255	YBR051W
YDR376W	107.656	103.738	67.5572	72.8695	-0.590538	1.64331e-08	6.50931e-08	S000002784	YDR376W	ARH1	Adrenodoxin Reductase Homolog
YDR236C	61.7909	54.9114	37.9825	31.5794	-0.74559	1.65763e-08	6.56237e-08	S000002644	YDR236C	FMN1	FMN biosynthesis
YHR164C	52.7311	48.7517	74.6374	81.317	0.619023	1.68101e-08	6.65125e-08	S000001207	YHR164C	DNA2	DNA synthesis defective
YBR089C-A	135.756	137.542	83.9302	95.7646	-0.60533	1.68635e-08	6.66865e-08	S000002157	YBR089C-A	NHP6B	Non-Histone Protein
YDR338C	77.5041	66.6299	109.448	113.607	0.629284	1.71266e-08	6.76896e-08	S000002746	YDR338C
YPL190C	238.104	212.209	364.558	349.189	0.664378	1.72063e-08	6.79667e-08	S000006111	YPL190C	NAB3	Nuclear polyAdenylated RNA-Binding
YAL045C	10.4754	10.4414	4.6464	4.89481	-1.13176	1.77395e-08	7.00342e-08	S000000043	YAL045C
YBR258C	50.1122	47.024	22.5682	30.2373	-0.880952	1.77963e-08	7.02195e-08	S000000462	YBR258C	SHG1	Set1c
YAR042W	161.237	136.79	259.313	228.398	0.710455	1.80698e-08	7.12592e-08	S000000081	YAR042W	SWH1
RUF20	28.949	24.113	13.4229	14.3686	-0.934114	1.84088e-08	7.2556e-08	S000130127	RUF20	RUF20	RNA of Unknown Function
YKL079W	151.894	162.931	96.9843	110.054	-0.604881	1.85491e-08	7.30684e-08	S000001562	YKL079W	SMY1	Suppressor of MYo2-66
YCL027W	14.2268	15.3992	25.5921	29.3689	0.890903	1.86785e-08	7.35375e-08	S000000532	YCL027W	FUS1	cell FUSion
YBR091C	27.3211	30.0473	14.2342	16.7371	-0.889931	1.89954e-08	7.47438e-08	S000000295	YBR091C	TIM12	Translocase of the Inner Membrane
YIL100C-A	0.778579	0.375591	3.0976	2.4474	2.23668	1.94186e-08	7.6367e-08	S000028794	YIL100C-A
YMR295C	312.918	339.234	520.175	508.507	0.657574	2.02179e-08	7.94665e-08	S000004910	YMR295C		Ilm1p BInding
YHR050W	183.391	174.875	285.2	271.109	0.634819	2.11262e-08	8.29907e-08	S000001092	YHR050W	SMF2	Suppressor of Mitochondria import Function
YIL018W	646.716	898.489	447.603	386.137	-0.890003	2.14536e-08	8.42307e-08	S000001280	YIL018W	RPL2B	Ribosomal Protein of the Large subunit
YDR099W	479.463	496.532	304.966	319.031	-0.645344	2.16995e-08	8.5149e-08	S000002506	YDR099W	BMH2	Brain Modulosignalin Homologue
YER004W	339.531	318.201	542.227	500.692	0.665037	2.17115e-08	8.51491e-08	S000000806	YER004W	FMP52	Found in Mitochondrial Proteome
YMR265C	45.8654	43.9442	71.466	65.5273	0.609247	2.18207e-08	8.55303e-08	S000004878	YMR265C
YDR237W	128.253	132.433	87.9128	88.5013	-0.563248	2.19341e-08	8.59278e-08	S000002645	YDR237W	MRPL7	Mitochondrial Ribosomal Protein
YOR271C	113.673	131.757	82.8239	64.8167	-0.732177	2.20567e-08	8.63605e-08	S000005797	YOR271C	FSF1	Fungal SideroFlexin 1
YOL081W	266.911	231.59	394.28	401.848	0.675245	2.20857e-08	8.64265e-08	S000005441	YOL081W	IRA2	Inhibitory Regulator of the RAS-cAMP pathway
YMR116C	672.48	972.556	464.271	395.374	-0.936186	2.2575e-08	8.82928e-08	S000004722	YMR116C	ASC1	Absence of growth Suppressor of Cyp1
YJL184W	50.183	56.1884	31.1972	33.5531	-0.716041	2.2601e-08	8.83462e-08	S000003720	YJL184W	GON7
YPR201W	11.7495	12.3945	22.7895	21.7898	0.885072	2.26557e-08	8.85112e-08	S000006405	YPR201W	ARR3	ARsenicals Resistance
YOR192C-B	2.33574	2.32867	6.63771	5.84219	1.41788	2.26707e-08	8.85214e-08	S000007354	YOR192C-B
YPR128C	49.9706	51.9818	79.21	73.7379	0.585624	2.29087e-08	8.94016e-08	S000006332	YPR128C	ANT1	Adenine Nucleotide Transporter
YOL055C	69.5059	67.3811	102.073	102.08	0.576471	2.29856e-08	8.96527e-08	S000005416	YOL055C	THI20	THIamine metabolism
YPL207W	213.543	186.744	311.382	319.899	0.657043	2.3141e-08	9.02092e-08	S000006128	YPL207W	TYW1	Trna-YW synthesizing protein
YPL135W	210.146	202.669	340.22	305.926	0.646395	2.32058e-08	9.04127e-08	S000006056	YPL135W	ISU1	IScU homolog
YNR052C	123.299	120.79	85.4052	78.238	-0.576471	2.32448e-08	9.0515e-08	S000005335	YNR052C	POP2	PGK promoter directed OverProduction
YML011C	27.1087	31.6999	15.8568	16.2634	-0.871611	2.35094e-08	9.14954e-08	S000004472	YML011C	RAD33	RADiation sensitive
YPL034W	18.7567	19.2303	8.26026	10.6581	-1.00769	2.38157e-08	9.26369e-08	S000005955	YPL034W
YIL171W	2.1234	2.70426	6.04769	6.78957	1.40978	2.3867e-08	9.27857e-08	S000001433	YIL171W
YNL161W	141.277	135.288	224.06	200.056	0.616896	2.38817e-08	9.27922e-08	S000005105	YNL161W	CBK1	Cell wall Biosynthesis Kinase
YBR084C-A	686.778	855.447	464.124	452.217	-0.750981	2.39739e-08	9.30999e-08	S000002156	YBR084C-A	RPL19A	Ribosomal Protein of the Large subunit
YKL092C	59.3136	64.827	39.7525	39.948	-0.638852	2.44581e-08	9.49285e-08	S000001575	YKL092C	BUD2	BUD site selection
YBR081C	87.8379	84.9587	123.535	134.607	0.578679	2.45872e-08	9.53773e-08	S000000285	YBR081C	SPT7	SuPpressor of Ty's
YHR143W-A	57.0486	63.0242	32.8198	39.7111	-0.727901	2.47695e-08	9.60322e-08	S000001185	YHR143W-A	RPC10	RNA Polymerase C
YKL163W	897.348	1026.72	1720.57	1494.89	0.740908	2.49265e-08	9.65884e-08	S000001646	YKL163W	PIR3	Protein containing Internal Repeats
YNL283C	81.6801	87.663	131.648	121.975	0.58315	2.49954e-08	9.68028e-08	S000005227	YNL283C	WSC2	cell Wall integrity and Stress response Component
YCL018W	486.258	453.714	830.156	709.353	0.711789	2.5886e-08	1.00198e-07	S000000523	YCL018W	LEU2	LEUcine biosynthesis
YPL131W	696.192	1003.73	477.915	426.875	-0.90971	2.59238e-08	1.00289e-07	S000006052	YPL131W	RPL5	Ribosomal Protein of the Large subunit
YKL128C	55.7038	65.8787	104.728	90.554	0.684518	2.64679e-08	1.02339e-07	S000001611	YKL128C	PMU1	PhosphoMUtase
YLL061W	75.1683	77.2967	114.021	111.002	0.561744	2.68124e-08	1.03615e-07	S000003984	YLL061W	MMP1	S-MethylMethionine Permease
YKR076W	273.281	251.271	430.197	396.874	0.656889	2.68698e-08	1.0378e-07	S000001784	YKR076W	ECM4	ExtraCellular Mutant
YDR064W	652.733	784.911	451.733	410.927	-0.736732	2.69959e-08	1.04211e-07	S000002471	YDR064W	RPS13	Ribosomal Protein of the Small subunit
YML037C	4.81304	4.20662	9.58781	10.6581	1.16184	2.70977e-08	1.04547e-07	S000004501	YML037C
YCL047C	31.4263	41.0897	16.8893	19.895	-0.97906	2.78049e-08	1.07217e-07	S000000552	YCL047C	POF1	Promoter Of Filamentation
YPR074C	250.136	342.088	176.858	158.213	-0.821365	2.78479e-08	1.07325e-07	S000006278	YPR074C	TKL1	TransKetoLase
YLL018C-A	64.4098	53.7847	90.3466	92.2908	0.626915	2.8673e-08	1.10445e-07	S000007245	YLL018C-A	COX19	Cytochrome c OXidase
YMR207C	81.5385	80.4516	117.266	120.791	0.555199	2.8968e-08	1.11521e-07	S000004820	YMR207C	HFA1
RPR1	19.6768	5.10804	58.5594	61.1851	2.2696	2.93825e-08	1.13056e-07	S000006490	RPR1	RPR1	RNase P Ribonucleoprotein
YDL247W-A	3.32666	1.87796	7.52274	6.86852	1.45721	3.01989e-08	1.16135e-07	S000007602	YDL247W-A
YKL153W	68.4442	71.0619	48.234	43.5006	-0.603834	3.05592e-08	1.17457e-07	S000001636	YKL153W
YBR087W	48.6966	57.5406	32.156	31.7373	-0.732675	3.10982e-08	1.19464e-07	S000000291	YBR087W	RFC5	Replication Factor C
YFR052W	298.054	297.694	189.544	199.345	-0.615404	3.11606e-08	1.19631e-07	S000001948	YFR052W	RPN12	Regulatory Particle Non-ATPase
YJL115W	133.349	159.1	97.5744	89.5276	-0.643754	3.11752e-08	1.19631e-07	S000003651	YJL115W	ASF1	Anti-Silencing Function
YPR082C	155.079	138.819	100.746	95.054	-0.585911	3.12537e-08	1.19867e-07	S000006286	YPR082C	DIB1	S. pombe DIm1+ in Budding yeast
YER095W	204.271	225.805	340.515	329.452	0.639617	3.17411e-08	1.21672e-07	S000000897	YER095W	RAD51	RADiation sensitive
YCR018C-A	25.5516	22.4604	11.7266	13.5791	-0.9256	3.19897e-08	1.22558e-07	S000007230	YCR018C-A
YLR189C	184.736	166.462	276.055	270.478	0.637875	3.26992e-08	1.25209e-07	S000004179	YLR189C	ATG26	AuTophaGy related
YLR009W	70.3553	72.7896	42.3339	49.8955	-0.634954	3.30948e-08	1.26656e-07	S000003999	YLR009W	RLP24	Ribosomal-Like Protein
YEL034C-A	545.572	662.768	372.449	361.584	-0.719013	3.31973e-08	1.2698e-07	S000028743	YEL034C-A
YAL043C	76.9378	78.3483	130.32	109.502	0.627482	3.34184e-08	1.27724e-07	S000000041	YAL043C	PTA1	Pre-Trna Accumulation
YIR013C	0.28312	0.600946	2.36008	2.4474	2.43197	3.34276e-08	1.27724e-07	S000001452	YIR013C	GAT4
YHR132C	226.142	181.786	358.436	320.215	0.734208	3.37157e-08	1.28756e-07	S000001174	YHR132C	ECM14	ExtraCellular Mutant
YBR028C	56.3408	60.7707	90.4941	84.396	0.579154	3.37421e-08	1.28788e-07	S000000232	YBR028C	YPK3
YBR262C	256.011	252.848	164.689	167.924	-0.613446	3.38331e-08	1.29066e-07	S000000466	YBR262C	MIC12	MItochondrial contact site and Cristae organizing system
YLL019C	250.915	232.566	408.293	359.847	0.667909	3.40222e-08	1.29718e-07	S000003942	YLL019C	KNS1	Kinase Next to SPA2
YNL113W	14.156	16.9016	8.11276	6.55273	-1.07789	3.62747e-08	1.38232e-07	S000005057	YNL113W	RPC19	RNA Polymerase C
YMR238W	157.273	168.04	267.279	240.556	0.64272	3.72707e-08	1.41951e-07	S000004851	YMR238W	DFG5	Defective for Filamentous Growth
YKL006C-A	101.569	74.5173	44.6202	54.5534	-0.829337	3.79856e-08	1.44597e-07	S000002101	YKL006C-A	SFT1	Suppressor of sed Five Ts
YDL110C	334.506	354.032	227.083	219.951	-0.623045	3.84686e-08	1.46357e-07	S000002268	YDL110C	TMA17	Translation Machinery Associated
YFR045W	91.9432	94.7241	64.3858	61.9746	-0.562536	3.90042e-08	1.48316e-07	S000001941	YFR045W
YHR046C	17.8365	20.8829	10.0303	9.94752	-0.952896	3.91796e-08	1.48903e-07	S000001088	YHR046C	INM1	INositol Monophosphatase
YIL009C-A	28.0289	35.6812	17.6268	15.4739	-0.942387	3.94885e-08	1.49997e-07	S000006432	YIL009C-A	EST3	Ever Shorter Telomeres
YCR105W	22.508	21.2585	40.49	35.211	0.790588	3.95128e-08	1.5001e-07	S000000702	YCR105W	ADH7	Alcohol DeHydrogenase
YOR046C	105.533	133.26	74.8586	74.5274	-0.676198	3.96231e-08	1.50348e-07	S000005572	YOR046C	DBP5	Dead Box Protein
YDL202W	82.3879	88.0386	59.1494	54.8692	-0.579122	4.06693e-08	1.54236e-07	S000002361	YDL202W	MRPL11	Mitochondrial Ribosomal Protein
YGR233C	100.578	86.3109	139.392	144.634	0.603271	4.11825e-08	1.56099e-07	S000003465	YGR233C	PHO81	PHOsphate metabolism
YPR172W	94.8451	99.6819	64.9758	65.6062	-0.574839	4.16278e-08	1.57703e-07	S000006376	YPR172W
YHR181W	48.555	53.1086	31.7873	31.1057	-0.692123	4.21557e-08	1.59618e-07	S000001224	YHR181W	SVP26	Sed5 Vesicle Protein
YOR213C	56.6947	46.348	76.7762	91.1066	0.702864	4.32523e-08	1.63683e-07	S000005739	YOR213C	SAS5	Something About Silencing
YDR264C	113.673	111.926	171.695	162.634	0.567552	4.34432e-08	1.64319e-07	S000002672	YDR264C	AKR1	AnKyrin Repeat containing
YHR064C	194.786	235.27	142.416	125.528	-0.682136	4.35494e-08	1.64633e-07	S000001106	YHR064C	SSZ1
YKL016C	856.65	823.672	548.127	527.692	-0.643283	4.49343e-08	1.69778e-07	S000001499	YKL016C	ATP7	ATP synthase
YDR337W	140.923	152.34	100.672	98.6067	-0.557115	4.55728e-08	1.721e-07	S000002745	YDR337W	MRPS28	Mitochondrial Ribosomal Protein
YLR283W	36.1686	35.7563	22.1257	20.5266	-0.753001	4.71534e-08	1.77974e-07	S000004273	YLR283W
YDR169C	110.063	104.339	161.591	152.765	0.552028	4.81185e-08	1.8152e-07	S000002576	YDR169C	STB3	Sin Three Binding protein
YDR329C	205.899	176.152	316.471	290.294	0.667244	4.85584e-08	1.83083e-07	S000002737	YDR329C	PEX3	PEroXin
YDR391C	180.984	189.598	116.824	129.002	-0.592316	4.87803e-08	1.83823e-07	S000002799	YDR391C
YFR005C	35.9562	45.1461	19.3231	23.6846	-0.915397	4.91765e-08	1.85217e-07	S000001901	YFR005C	SAD1	SnRNP Assembly Defective
YCR102W-A	0.28312	0.450709	1.84381	2.6053	2.57293	4.9405e-08	1.8598e-07	S000007231	YCR102W-A
YER084W	44.5914	41.4653	65.1971	64.7378	0.59392	5.06214e-08	1.90458e-07	S000000886	YER084W
YNR062C	7.64424	7.73718	14.6767	15.395	0.966045	5.0848e-08	1.9121e-07	S000005345	YNR062C
YOR143C	25.8347	28.4698	11.8004	15.8687	-0.974316	5.17959e-08	1.94672e-07	S000005669	YOR143C	THI80	THIamine metabolism
YFR046C	57.5441	50.3292	79.3575	84.1591	0.599131	5.18655e-08	1.94831e-07	S000001942	YFR046C	CNN1	Co-purified with NNf1p
YOL162W	8.56437	8.11277	15.193	19.8161	1.06677	5.24147e-08	1.9679e-07	S000005522	YOL162W
YLR217W	57.261	62.1979	30.1647	39.7901	-0.773082	5.248e-08	1.96931e-07	S000004207	YLR217W
YDR404C	97.1809	99.0058	59.9607	68.9221	-0.606701	5.25443e-08	1.97069e-07	S000002812	YDR404C	RPB7	RNA Polymerase B
YBL067C	97.0393	89.0151	134.746	140.292	0.563469	5.31168e-08	1.99111e-07	S000000163	YBL067C	UBP13	UBiquitin-specific Protease
YAR018C	42.9634	38.3103	60.3294	66.4747	0.640539	5.34352e-08	2.00199e-07	S000000071	YAR018C	KIN3	protein KINase
YNL019C	1.7695	1.27701	5.67893	4.10532	1.676	5.36907e-08	2.01051e-07	S000004964	YNL019C
YBR076W	57.7564	56.2636	80.0951	96.712	0.632061	5.4144e-08	2.02642e-07	S000000280	YBR076W	ECM8	ExtraCellular Mutant
YPR120C	87.0593	91.3438	61.5095	60.1588	-0.551807	5.42422e-08	2.02903e-07	S000006324	YPR120C	CLB5	CycLin B
YDL240W	28.8074	31.2492	49.0453	48.1586	0.69513	5.45674e-08	2.04012e-07	S000002399	YDL240W	LRG1	Lim-RhoGap homolog
YOR233W	36.8056	37.7845	57.0106	57.7114	0.62106	5.56679e-08	2.08017e-07	S000005759	YOR233W	KIN4	KINase
YDR050C	1680.46	1920.32	1130.99	1105.2	-0.68724	5.59379e-08	2.08917e-07	S000002457	YDR050C	TPI1	Triose-Phosphate Isomerase
YJR080C	214.959	214.613	147.21	138.397	-0.588699	5.61687e-08	2.09669e-07	S000003841	YJR080C	AIM24	Altered Inheritance rate of Mitochondria
YIL118W	66.3208	73.3154	46.759	45.8691	-0.591509	5.66564e-08	2.11379e-07	S000001380	YIL118W	RHO3	Ras HOmolog
YNL255C	260.612	312.116	187.7	167.45	-0.689111	5.69131e-08	2.12226e-07	S000005199	YNL255C	GIS2	GIg Suppressor
YDR244W	107.302	97.8791	152.594	149.213	0.556465	5.949e-08	2.21718e-07	S000002652	YDR244W	PEX5	PEroXin
YPR186C	29.586	26.667	43.9564	52.3429	0.774098	6.05238e-08	2.25454e-07	S000006390	YPR186C	PZF1	Putative Zinc Finger
YLR461W	0.07078	0.0751182	1.03253	1.57897	3.99172	6.1469e-08	2.28855e-07	S000004453	YLR461W	PAU4	seriPAUperin family
YGL247W	58.1103	52.8081	33.9261	36.3163	-0.659828	6.1692e-08	2.29565e-07	S000003216	YGL247W	BRR6	Bad Response to Refrigeration
YOR137C	45.8654	40.639	64.4596	67.1063	0.603934	6.28069e-08	2.33592e-07	S000005663	YOR137C	SIA1	Suppressor of eIF5A
YAL008W	209.579	217.167	135.114	147.318	-0.59559	6.34176e-08	2.3574e-07	S000000006	YAL008W	FUN14	Function Unknown Now
YMR062C	146.231	117.56	218.823	201.792	0.672821	6.40379e-08	2.37922e-07	S000004666	YMR062C	ARG7	ARGinine requiring
YER064C	108.081	113.879	76.4812	75.0801	-0.550102	6.47406e-08	2.40407e-07	S000000866	YER064C	VHR2	VHt1 Regulator
YJR147W	139.649	134.987	217.053	195.792	0.588147	6.47997e-08	2.40501e-07	S000003908	YJR147W	HMS2	High-copy Mep Suppressor
YGL241W	47.9888	53.334	32.2298	30.3162	-0.694931	6.57981e-08	2.4408e-07	S000003210	YGL241W	KAP114	KAryoPherin
YHR051W	980.727	964.669	631.91	621.404	-0.634304	6.63352e-08	2.45944e-07	S000001093	YHR051W	COX6	Cytochrome c OXidase
YJL009W	8.56437	7.73718	3.31886	3.63163	-1.23018	6.72018e-08	2.49028e-07	S000003546	YJL009W
YER045C	257.356	277.337	169.999	178.976	-0.615573	6.87115e-08	2.5449e-07	S000000847	YER045C	ACA1	ATF/CREB Activator
YLR076C	6.79488	6.1597	2.50758	2.6053	-1.33989	6.95471e-08	2.57451e-07	S000004066	YLR076C
YML105C	95.6237	111.325	70.0647	63.8694	-0.626928	6.97557e-08	2.58089e-07	S000004573	YML105C	SEC65	SECretory
YNL248C	47.7057	65.5782	32.0085	31.2636	-0.839205	7.26826e-08	2.68779e-07	S000005192	YNL248C	RPA49	RNA Polymerase A
YHR206W	77.5748	80.076	118.52	112.186	0.549574	7.28893e-08	2.69403e-07	S000001249	YHR206W	SKN7	Suppressor of Kre Null
YBR129C	84.3697	89.8414	57.0843	61.1062	-0.559821	7.34283e-08	2.71255e-07	S000000333	YBR129C	OPY1	Overproduction-induced Pheromone-resistant Yeast
YFL023W	50.2538	49.6532	73.0148	73.8169	0.555293	7.40932e-08	2.73569e-07	S000001871	YFL023W	BUD27	BUD site selection
YOL080C	9.05983	10.6668	3.46636	4.97376	-1.22686	7.59852e-08	2.80409e-07	S000005440	YOL080C	REX4	Rna EXonuclease
YDL239C	44.379	48.9771	27.1409	29.5268	-0.720231	7.61366e-08	2.80823e-07	S000002398	YDL239C	ADY3	Accumulation of DYads
YPL167C	58.8181	54.5358	81.8651	85.5013	0.561522	7.70531e-08	2.84056e-07	S000006088	YPL167C	REV3	REVersionless
YOR073W	24.136	25.0144	38.3512	46.9744	0.794851	7.80986e-08	2.87761e-07	S000005599	YOR073W	SGO1	ShuGOshin (Japanese for "guardian spirit")
YDR204W	179.498	175.777	123.166	118.581	-0.555325	7.84489e-08	2.88903e-07	S000002612	YDR204W	COQ4	COenzyme Q
YJL060W	58.6058	69.1088	42.4814	36.9479	-0.683705	7.87165e-08	2.89739e-07	S000003596	YJL060W	BNA3	Biosynthesis of Nicotinic Acid
YGL038C	80.406	78.1981	114.242	116.449	0.540305	7.89653e-08	2.90504e-07	S000003006	YGL038C	OCH1	Outer CHain elongation
YHL046W-A	4.17602	3.3052	8.85028	8.36854	1.19798	7.98184e-08	2.93491e-07	S000028775	YHL046W-A
YHR104W	438.482	483.987	300.91	294.715	-0.63101	8.37233e-08	3.07691e-07	S000001146	YHR104W	GRE3	Genes de Respuesta a Estres (stress responsive genes)
YFR019W	111.195	112.076	166.385	160.739	0.551102	8.55151e-08	3.14114e-07	S000001915	YFR019W	FAB1	Forms Aploid and Binucleate cells
YNL210W	2.26496	2.55402	5.97394	6.31588	1.34845	8.6054e-08	3.1593e-07	S000005154	YNL210W	MER1	MEiotic Recombination
YGL108C	56.7655	55.5124	36.7287	36.5532	-0.615487	8.73881e-08	3.20663e-07	S000003076	YGL108C
YDR544C	1.20326	1.42725	4.35139	3.94743	1.65505	8.78775e-08	3.22293e-07	S000002952	YDR544C
YER072W	252.401	258.933	175.309	157.976	-0.617273	8.85164e-08	3.24469e-07	S000000874	YER072W	VTC1	Vacuolar Transporter Chaperone
YLL012W	37.0179	34.7046	52.8067	63.0799	0.690987	8.89052e-08	3.25727e-07	S000003935	YLL012W	YEH1	Yeast steryl Ester Hydrolase
YGR174W-A	71.5585	49.578	23.3795	34.4216	-1.06901	8.94015e-08	3.27377e-07	S000028639	YGR174W-A
YLR031W	13.8729	14.7232	23.9695	29.8425	0.910908	9.09336e-08	3.32816e-07	S000004021	YLR031W
YKL029C	90.8107	87.062	151.782	123.87	0.632263	9.10079e-08	3.32917e-07	S000001512	YKL029C	MAE1	MAlic Enzyme
YDL004W	658.395	643.238	437.499	397.032	-0.641218	9.11891e-08	3.33409e-07	S000002162	YDL004W	ATP16	ATP synthase
YIL119C	156.141	103.738	228.559	245.135	0.865638	9.24568e-08	3.37868e-07	S000001381	YIL119C	RPI1	Ras-cAMP Pathway Inhibitor
YER038C	20.0307	20.4322	35.1061	32.8426	0.748155	9.25037e-08	3.37868e-07	S000000840	YER038C	KRE29	Killer toxin REsistant
YDR421W	82.034	75.7192	116.012	114.87	0.549164	9.42946e-08	3.44233e-07	S000002829	YDR421W	ARO80	AROmatic amino acid requiring
Q0255	0.7078	0.0751182	1.99131	5.05271	3.11168	9.60904e-08	3.50609e-07	S000007282	Q0255
YPL248C	64.339	63.1744	95.3618	90.8698	0.546495	9.68862e-08	3.53332e-07	S000006169	YPL248C	GAL4	GALactose metabolism
YHL032C	728.892	613.04	1311.32	1019.46	0.796492	9.76249e-08	3.55844e-07	S000001024	YHL032C	GUT1	Glycerol UTilization
YOR235W	0.56624	0.751182	2.28632	3.31584	2.0723	9.84094e-08	3.5852e-07	S000005761	YOR235W	IRC13	Increased Recombination Centers
YML119W	80.6891	68.6581	117.93	109.028	0.603373	9.92002e-08	3.61216e-07	S000004588	YML119W
YOR030W	75.593	60.996	103.18	110.686	0.645933	9.99131e-08	3.63627e-07	S000005556	YOR030W	DFG16	Defective for Filamentous Growth
YBR241C	343.849	338.483	595.55	496.744	0.678873	1.00267e-07	3.6473e-07	S000000445	YBR241C
YGR239C	93.0049	94.7992	63.5008	64.422	-0.553903	1.01044e-07	3.67369e-07	S000003471	YGR239C	PEX21	PEroXin
YBR188C	34.5406	39.4371	20.9457	22.4214	-0.770173	1.01963e-07	3.70521e-07	S000000392	YBR188C	NTC20	Prp19p (NineTeen)-associated Complex
YDR138W	38.8582	43.8691	60.0344	72.0011	0.674246	1.02936e-07	3.73866e-07	S000002545	YDR138W	HPR1	HyPerRecombination
YOR160W	67.0994	67.0055	44.1777	46.5796	-0.563572	1.03098e-07	3.74262e-07	S000005686	YOR160W	MTR10	Mrna TRansport defective
YGL156W	413.85	386.333	635.598	604.035	0.631481	1.03389e-07	3.75126e-07	S000003124	YGL156W	AMS1	Alpha-MannoSidase
YLR220W	235.343	223.777	347.669	348.321	0.600115	1.04402e-07	3.7861e-07	S000004210	YLR220W	CCC1	Cross-Complements Ca(2+) phenotype of csg1
YJL121C	116.221	129.654	86.4378	77.2906	-0.585891	1.05068e-07	3.80832e-07	S000003657	YJL121C	RPE1	Ribulose 5-Phosphate Epimerase
YLL032C	37.2303	32.3008	52.5854	59.4482	0.686761	1.08208e-07	3.92012e-07	S000003955	YLL032C
YDR305C	54.7129	57.3152	35.9911	37.0269	-0.617407	1.09722e-07	3.97258e-07	S000002713	YDR305C	HNT2	Histidine triad NucleoTide-binding
YKL001C	67.6656	80.3765	39.1625	50.2113	-0.728654	1.09767e-07	3.97258e-07	S000001484	YKL001C	MET14	METhionine requiring
YJR153W	22.7204	18.9298	39.015	34.3426	0.815821	1.10207e-07	3.98646e-07	S000003914	YJR153W	PGU1	PolyGalactUronase
YMR179W	59.1013	61.2214	36.5812	41.6059	-0.622524	1.10902e-07	4.00958e-07	S000004791	YMR179W	SPT21	SuPpressor of Ty
YKR054C	101.782	71.5126	148.463	145.423	0.761369	1.12136e-07	4.05215e-07	S000001762	YKR054C	DYN1	DYNein
YBR225W	74.4605	69.3341	103.991	106.738	0.550938	1.18937e-07	4.29571e-07	S000000429	YBR225W
YJR103W	235.273	223.777	355.708	340.742	0.601331	1.19237e-07	4.30381e-07	S000003864	YJR103W	URA8	URAcil requiring
YPR002C-A	41.4063	34.0286	15.8568	22.2635	-0.986744	1.19282e-07	4.30381e-07	S000007254	YPR002C-A
YGR017W	86.5639	86.0855	62.0257	54.4745	-0.56673	1.19592e-07	4.31282e-07	S000003249	YGR017W
YJL192C	103.693	115.832	76.7024	68.7642	-0.592911	1.19979e-07	4.3246e-07	S000003728	YJL192C	SOP4	Suppressor Of Pma1-7
YER098W	75.7346	71.8882	107.752	107.291	0.542457	1.20529e-07	4.34222e-07	S000000900	YER098W	UBP9	UBiquitin-specific Protease
YDL052C	106.241	109.147	75.6699	72.08	-0.543405	1.23066e-07	4.43137e-07	S000002210	YDL052C	SLC1	SphingoLipid Compensation
YKL142W	643.248	672.984	403.794	443.217	-0.635994	1.24469e-07	4.47964e-07	S000001625	YKL142W	MRP8	Mitochondrial Ribosomal Protein
YPL278C	1.62794	1.80284	5.01516	4.73691	1.50466	1.26465e-07	4.54915e-07	S000006199	YPL278C
YJR142W	105.958	122.368	77.6612	74.6853	-0.583167	1.26661e-07	4.55391e-07	S000003903	YJR142W
YER174C	138.658	142.349	98.6069	95.8435	-0.530989	1.2718e-07	4.57027e-07	S000000976	YER174C	GRX4	GlutaRedoXin
YBR240C	25.6931	19.9815	45.579	38.0532	0.871802	1.27321e-07	4.57304e-07	S000000444	YBR240C	THI2	THIamine metabolism
YBR186W	20.4554	19.2303	32.0085	35.211	0.758941	1.27977e-07	4.59428e-07	S000000390	YBR186W	PCH2	Pachytene CHeckpoint
YDL079C	357.368	343.441	222.216	238.582	-0.604985	1.28727e-07	4.61889e-07	S000002237	YDL079C	MRK1	Mds1p Related Kinase
YKL215C	53.1557	62.4984	86.2165	87.396	0.586642	1.30147e-07	4.66749e-07	S000001698	YKL215C	OXP1	OXoProlinase
YPL156C	135.402	122.593	192.272	191.055	0.571001	1.31099e-07	4.69924e-07	S000006077	YPL156C	PRM4	Pheromone-Regulated Membrane protein
YPR056W	93.0756	83.832	57.2318	61.9746	-0.570234	1.33101e-07	4.7686e-07	S000006260	YPR056W	TFB4	Transcription Factor B subunit 4
YDR353W	409.108	464.982	293.977	255.872	-0.668545	1.34088e-07	4.80155e-07	S000002761	YDR353W	TRR1	ThioRedoxin Reductase
YGR052W	56.9071	45.747	81.9389	78.0801	0.639617	1.3841e-07	4.95384e-07	S000003284	YGR052W	FMP48	Found in Mitochondrial Proteome
YMR217W	120.397	162.406	90.8629	72.2379	-0.793174	1.38708e-07	4.962e-07	S000004830	YMR217W	GUA1	GUanine Auxotroph
YKL059C	54.2174	57.0147	86.8803	78.0801	0.56916	1.38878e-07	4.96561e-07	S000001542	YKL059C	MPE1	Mutant PCF11 Extragenic suppressor
YPL233W	27.2503	24.3383	44.2514	40.7374	0.719726	1.40279e-07	5.01317e-07	S000006154	YPL233W	NSL1	Nnf1 Synthetic Lethal
YOR285W	1453.11	1232.09	816.365	858.328	-0.681166	1.43731e-07	5.13397e-07	S000005811	YOR285W	RDL1	RhoDanese-Like protein
YOR261C	374.992	375.967	233.869	257.846	-0.611007	1.44003e-07	5.14109e-07	S000005787	YOR261C	RPN8	Regulatory Particle Non-ATPase
YPL186C	270.804	227.984	413.308	378.558	0.666725	1.4445e-07	5.15449e-07	S000006107	YPL186C	UIP4	Ulp1 Interacting Protein
YOR314W	0.49546	0.751182	2.95009	2.28951	2.0671	1.47165e-07	5.24874e-07	S000005841	YOR314W
YAL048C	41.2647	39.8127	62.247	59.9219	0.591378	1.52707e-07	5.44367e-07	S000000046	YAL048C	GEM1	GTPase EF-hand protein of Mitochondria
[truncated: 5,127 more rows]

## Sheet: Upregulated genes
Gene	ScK1.count	ScK2.count	ScM1.count	ScM2.count	logFC	P-value	FDR	ID	Syst.name	Symbol	Description
YMR011W	25.9055	23.5871	774.252	808.275	4.9977	9.17344e-266	6.537e-262	S000004613	YMR011W	HXT2	HeXose Transporter
YMR303C	58.7474	53.8598	1743.87	1382.15	4.79453	6.71367e-191	1.59472e-187	S000004918	YMR303C	ADH2	Alcohol DeHydrogenase
YBR056W-A	2.90198	1.87796	83.8564	83.5275	5.11695	5.41205e-185	9.64157e-182	S000028736	YBR056W-A		non-annotated
YNR064C	24.136	18.8547	324.437	327.163	3.91942	5.61453e-183	8.00183e-180	S000005347	YNR064C		Epoxide hydrolase
YOR385W	26.9672	30.8736	608.531	747.327	4.55113	1.08345e-181	1.28678e-178	S000005912	YOR385W		non-annotated, similar to DIA1
YMR316W	29.0198	28.6201	337.122	360.4	3.59652	2.40972e-176	2.14645e-173	S000004935	YMR316W	DIA1	Digs Into Agar
YBR296C	36.027	31.5497	363.968	325.268	3.34942	2.03526e-146	1.61148e-143	S000000500	YBR296C	PHO89	PHOsphate metabolism
YPL036W	31.5679	22.6857	810.17	646.115	4.74466	2.28819e-145	1.63056e-142	S000005957	YPL036W	PMA2	Plasma Membrane ATPase
YGL205W	38.3627	37.1835	292.871	280.346	2.92321	7.23708e-145	4.68831e-142	S000003173	YGL205W	POX1
YER184C	21.9418	18.8547	160.928	160.739	2.97707	5.87836e-137	3.49077e-134	S000000986	YER184C	TOG1	Transcriptional regulator of Oleate utilization Genes
YJL153C	86.1392	67.2308	1031.87	1110.33	3.80332	1.46945e-136	8.05487e-134	S000003689	YJL153C	INO1	INOsitol requiring
YDL218W	22.1541	19.8312	185.93	159.16	3.03782	4.67298e-124	2.21998e-121	S000002377	YDL218W
YGL255W	53.8635	49.2025	380.931	377.216	2.87832	1.13958e-121	5.07541e-119	S000003224	YGL255W	ZRT1	Zinc-Regulated Transporter
YOL016C	238.387	245.712	1747.64	1754.08	2.85467	1.06155e-112	4.44977e-110	S000005376	YOL016C	CMK2	CalModulin dependent protein Kinase
YMR096W	166.899	138.969	1338.75	1280.31	3.09777	1.3595e-109	5.3821e-107	S000004702	YMR096W	SNZ1	SNooZe
YPL275W	3.11432	3.60568	58.2644	52.6587	4.04393	1.46015e-109	5.47634e-107	S000006196	YPL275W	FDH2
YOL104C	6.22864	6.46017	71.171	66.001	3.43322	1.66938e-107	5.94801e-105	S000005464	YOL104C	NDJ1	NonDisJunction
YEL065W	39.1413	35.6812	187.773	194.766	2.3531	1.09511e-104	3.54715e-102	S000000791	YEL065W	SIT1	Siderophore Iron Transport
YPR145C-A	4.2468	3.15497	55.5355	62.922	3.99207	1.78644e-104	5.53486e-102	S000113589	YPR145C-A
YOR383C	47.1394	41.5404	220.667	218.845	2.30828	1.30326e-100	3.7148e-98	S000005910	YOR383C	FIT3	Facilitator of Iron Transport
YHR139C	31.6386	21.3336	351.577	301.662	3.62219	1.92581e-100	5.2782e-98	S000001181	YHR139C	SPS100	SPorulation Specific
YOR388C	6.3702	4.50709	62.9108	64.3431	3.54125	1.04495e-98	2.7579e-96	S000005915	YOR388C	FDH1	Formate DeHydrogenase
YER096W	35.4608	30.0473	175.309	183.634	2.45249	1.23055e-97	3.13175e-95	S000000898	YER096W	SHC1	Sporulation-specific Homolog of CSD4
YEL069C	8.91827	8.11277	70.3597	78.0011	3.11995	4.452e-97	1.09396e-94	S000000795	YEL069C	HXT13	HeXose Transporter
YLR054C	17.2703	15.6246	96.0256	108.712	2.63575	4.78577e-97	1.13678e-94	S000004044	YLR054C	OSW2	Outer Spore Wall
YBR182C	25.5516	28.9205	143.153	151.107	2.43393	1.21865e-96	2.80133e-94	S000000386	YBR182C	SMP1	Second MEF2-like Protein 1
YIL067C	39.9907	36.0568	177.964	185.055	2.25406	2.91613e-95	6.49386e-93	S000001329	YIL067C
YHL024W	80.6184	74.1417	417.733	415.98	2.42913	1.57642e-93	3.30399e-91	S000001016	YHL024W	RIM4	Regulator of IME2
YKR102W	54.8545	47.4747	266.689	258.399	2.35852	1.58355e-91	3.22412e-89	S000001810	YKR102W	FLO10	FLOcculation
YPL277C	24.136	21.7092	135.114	117.633	2.46187	8.53155e-90	1.68877e-87	S000006198	YPL277C
YPL141C	62.4279	53.1086	311.677	323.847	2.45879	2.19941e-88	4.23594e-86	S000006062	YPL141C	FRK1	Fatty acyl-CoA synthetase and RNA processing-associated Kinase
YBR284W	31.214	28.5449	171.917	218.214	2.70555	2.66112e-86	4.86235e-84	S000000488	YBR284W
YFL020C	14.7222	14.6481	85.184	102.554	2.67493	6.33788e-85	1.10155e-82	S000001874	YFL020C	PAU5	seriPAUperin family
YGR213C	19.4645	19.2303	89.1666	91.5803	2.22298	1.67048e-83	2.76833e-81	S000003445	YGR213C	RTA1	Resistance To 7-Aminocholesterol
YIL101C	119.123	115.983	624.387	571.193	2.34623	8.04338e-82	1.30266e-79	S000001363	YIL101C	XBP1	XhoI site-Binding Protein
YLR234W	19.5353	14.2725	100.967	102.002	2.58238	1.0054e-80	1.5575e-78	S000004224	YLR234W	TOP3	TOPoisomerase
YOR328W	106.028	92.6208	498.861	503.928	2.33531	5.47524e-79	8.12846e-77	S000005855	YOR328W	PDR10	Pleiotropic Drug Resistance
YJR094C	19.3937	18.9298	88.5766	100.817	2.30385	1.47098e-78	2.13923e-76	S000003854	YJR094C	IME1	Inducer of MEiosis
YMR085W	40.1322	39.8127	155.691	152.529	1.94663	2.0691e-78	2.94888e-76	S000004690	YMR085W
YNL192W	248.65	248.641	1147.07	1198.99	2.23802	9.97802e-75	1.39418e-72	S000005136	YNL192W	CHS1	CHitin Synthase
YNL270C	44.5914	39.6624	164.468	161.844	1.95254	3.75185e-73	5.14148e-71	S000005214	YNL270C	ALP1
YCR010C	168.315	134.161	949.119	875.223	2.59217	4.44608e-73	5.97788e-71	S000000603	YCR010C	ADY2	Accumulation of DYads
YMR058W	58.6058	52.4325	259.608	228.003	2.13421	3.35581e-72	4.42843e-70	S000004662	YMR058W	FET3	FErrous Transport
YMR095C	33.2666	27.7186	135.483	135.318	2.14913	4.92808e-72	6.385e-70	S000004701	YMR095C	SNO1	SNZ proximal Open reading frame
YAL054C	378.956	331.872	2240.74	1904.08	2.54366	6.69797e-72	8.52316e-70	S000000050	YAL054C	ACS1	Acetyl CoA Synthetase
YMR251W	10.5462	9.61514	63.8695	60.3167	2.6209	3.24064e-71	4.05137e-69	S000004863	YMR251W	GTO3	Glutathione Transferase Omega-like
YDR213W	25.3392	23.3618	99.4182	109.265	2.09787	4.26388e-71	5.2387e-69	S000002621	YDR213W	UPC2	UPtake Control
YNR063W	12.3157	11.0424	65.4921	68.2905	2.51559	8.53348e-71	1.01349e-68	S000005346	YNR063W
YMR147W	14.5807	13.0706	70.6548	72.7905	2.37304	4.34522e-70	5.07608e-68	S000004755	YMR147W
YOR382W	52.4479	56.8645	200.606	193.661	1.85101	1.25329e-69	1.44047e-67	S000005909	YOR382W	FIT2	Facilitator of Iron Transport
YIR019C	8.84749	9.69025	55.9043	55.6587	2.58922	1.69325e-68	1.91526e-66	S000001458	YIR019C	FLO11	FLOcculation
YJL056C	34.9653	33.5779	124.273	130.976	1.8961	1.42505e-67	1.58671e-65	S000003592	YJL056C	ZAP1	Zinc-responsive Activator Protein
YDR384C	24.2067	23.8125	95.5093	90.2382	1.95133	3.25068e-67	3.56375e-65	S000002792	YDR384C	ATO3	Ammonia (Ammonium) Transport Outward
YDL234C	258.276	242.857	1072.58	1110.17	2.12278	6.82086e-67	7.36446e-65	S000002393	YDL234C	GYP7	Gtpase-activating protein for Ypt7 Protein
YOR058C	60.4461	46.1977	292.354	352.505	2.59512	1.08928e-66	1.15854e-64	S000005584	YOR058C	ASE1	Anaphase Spindle Elongation
YIL159W	56.8363	53.1837	239.843	305.215	2.30802	4.0252e-65	4.21818e-63	S000001421	YIL159W	BNR1	BNi1 Related
YMR015C	109.497	105.917	405.269	414.006	1.92706	2.73988e-63	2.82962e-61	S000004617	YMR015C	ERG5	ERGosterol biosynthesis
YMR084W	10.9709	10.5917	64.4596	57.5535	2.49947	5.48554e-63	5.58428e-61	S000004689	YMR084W
YOL152W	41.6186	36.8079	137.622	140.134	1.82335	3.56239e-62	3.47747e-60	S000005512	YOL152W	FRE7	Ferric REductase
YJR106W	39.0705	38.1601	131.795	131.055	1.76661	4.45902e-62	4.29391e-60	S000003867	YJR106W	ECM27	ExtraCellular Mutant
YDR040C	17.7658	16.0002	71.2448	72.4748	2.08792	1.14354e-59	1.07221e-57	S000002447	YDR040C	ENA1	Exitus NAtru (Latin
YPR002W	231.521	192.303	1017.12	945.172	2.21081	2.45459e-59	2.27161e-57	S000006206	YPR002W	PDH1	prpD Homolog
YOR338W	52.0233	39.0615	200.901	193.819	2.11423	1.98744e-58	1.79272e-56	S000005865	YOR338W
YJR150C	2.54808	2.25355	24.6333	29.211	3.47922	3.08705e-58	2.74979e-56	S000003911	YJR150C	DAN1	Delayed ANaerobic
YDL024C	29.3737	30.3478	96.2468	98.5278	1.70535	5.27077e-57	4.58043e-55	S000002182	YDL024C	DIA3	Digs Into Agar
YBR005W	69.0105	70.9116	272.589	236.53	1.8635	5.93093e-57	5.09203e-55	S000000209	YBR005W	RCR1	Resistance to Congo Red
YDR111C	50.8908	49.2025	157.535	152.686	1.63167	2.05655e-56	1.72411e-54	S000002518	YDR111C	ALT2	ALanine Transaminase
YOR180C	13.9437	14.3476	62.247	68.8431	2.21128	4.92593e-56	4.03473e-54	S000005706	YOR180C	DCI1	delta(3
YOL015W	9.55529	9.69025	47.939	52.4218	2.38123	1.96113e-55	1.57023e-53	S000005375	YOL015W	IRC10	Increased Recombination Centers
YOR188W	48.1304	42.3667	144.997	150.002	1.70377	2.62682e-55	2.07985e-53	S000005714	YOR188W	MSB1	Multicopy Suppression of a Budding defect
YKL050C	33.762	30.7234	123.461	107.054	1.8373	1.34717e-54	1.05494e-52	S000001533	YKL050C
YLR056W	116.645	127.401	474.228	431.296	1.89174	2.08371e-54	1.61397e-52	S000004046	YLR056W	ERG3	ERGosterol biosynthesis
YBL034C	46.8563	47.3245	145.218	167.45	1.73067	1.65384e-53	1.26723e-51	S000000130	YBL034C	STU1	Suppressor of TUbulin
YKL107W	36.3809	29.3712	121.913	115.265	1.84937	2.59279e-53	1.96556e-51	S000001590	YKL107W
YGR138C	20.1723	20.8078	73.1623	75.5537	1.85924	6.3216e-53	4.74186e-51	S000003370	YGR138C	TPO2	Transporter of POlyamines
YDR497C	396.58	346.07	1590.99	1435.84	2.02697	2.05267e-52	1.49258e-50	S000002905	YDR497C	ITR1	myo-Inositol TRansporter
YOR028C	25.9055	26.3665	82.5289	85.7381	1.68627	3.31353e-52	2.38507e-50	S000005554	YOR028C	CIN5	Chromosome INstability
YGR142W	221.824	220.247	779.784	884.539	1.91249	4.42928e-52	3.12506e-50	S000003374	YGR142W	BTN2	BaTteN disease
YLR120C	78.495	92.0199	336.901	306.557	1.91629	9.62212e-52	6.72228e-50	S000004110	YLR120C	YPS1	YaPSin
YIL166C	53.4389	56.0382	163.656	158.45	1.55707	3.4777e-51	2.40603e-49	S000001428	YIL166C
YFL011W	7.71502	6.1597	40.0475	39.4743	2.5146	4.71958e-51	3.23382e-49	S000001883	YFL011W	HXT10	HeXose Transporter
YOL158C	62.9942	58.8176	190.06	175.345	1.58455	1.22104e-50	8.28678e-49	S000005518	YOL158C	ENB1	ENteroBactin
YER020W	318.581	291.459	1366.7	1141.91	2.03986	1.61593e-50	1.08633e-48	S000000822	YER020W	GPA2	G Protein Alpha subunit
YJL133C-A	52.7311	45.5217	151.266	157.187	1.64947	1.79252e-50	1.19378e-48	S000028805	YJL133C-A
YPL147W	97.2517	89.5409	304.007	308.847	1.71378	1.0263e-49	6.77166e-48	S000006068	YPL147W	PXA1	PeroXisomal ABC-transporter
YHR084W	38.0088	42.1413	122.355	124.897	1.62555	1.13136e-49	7.39638e-48	S000001126	YHR084W	STE12	STErile
YDR535C	3.46822	3.07985	24.1908	24.0793	2.87661	1.21686e-49	7.88303e-48	S000002943	YDR535C
YIL160C	135.473	125.823	426.657	438.085	1.72636	1.29488e-49	8.31291e-48	S000001422	YIL160C	POT1	Peroxisomal Oxoacyl Thiolase
YDL223C	318.014	251.947	1464.21	1225.36	2.2383	6.92202e-49	4.40414e-47	S000002382	YDL223C	HBT1	HuB1 Target
YOL084W	150.549	122.142	533.598	511.665	1.93818	3.70812e-48	2.33842e-46	S000005444	YOL084W	PHM7	PHosphate Metabolism
YDR223W	40.6277	39.1366	113.874	114.791	1.51892	4.24801e-48	2.65538e-46	S000002631	YDR223W	CRF1	Co-Repressor with FHL1
YER011W	8.13969	7.51182	37.6137	38.8427	2.28581	9.99711e-47	6.08884e-45	S000000813	YER011W	TIR1	TIp1-Related
YDL233W	63.702	61.6721	170.81	179.845	1.48341	1.29325e-46	7.67972e-45	S000002392	YDL233W	MFG1	Morphogenetic regulator of Filamentous Growth
YOR315W	18.332	20.5073	70.876	67.422	1.83289	1.76616e-46	1.04013e-44	S000005842	YOR315W	SFG1	SuperFicial pseudohyphal Growth
YPR001W	150.407	114.33	587.732	535.508	2.08466	2.44377e-46	1.4274e-44	S000006205	YPR001W	CIT3	CITrate synthase
YNL093W	94.0666	78.799	289.699	287.294	1.73836	4.39272e-46	2.54492e-44	S000005037	YNL093W	YPT53	Yeast Protein Two
YLR414C	138.587	138.218	423.043	428.691	1.62145	6.84057e-46	3.87942e-44	S000004406	YLR414C	PUN1	Plasma membrane protein Upregulated during Nitrogen stress
YLR431C	41.831	41.6155	124.051	116.923	1.5299	6.85949e-46	3.87942e-44	S000004423	YLR431C	ATG23	AuTophaGy related
YMR189W	78.495	85.109	247.66	232.819	1.5545	7.30577e-45	3.97412e-43	S000004801	YMR189W	GCV2	GlyCine cleaVage
YGR060W	177.516	182.012	597.099	549.719	1.67348	1.17325e-44	6.23925e-43	S000003292	YGR060W	ERG25	ERGosterol biosynthesis
YOR373W	72.2663	67.3811	187.405	190.266	1.43489	1.55692e-44	8.21824e-43	S000005900	YOR373W	NUD1
YJR154W	15.0054	13.8969	56.5681	53.9218	1.93345	2.39414e-44	1.25446e-42	S000003915	YJR154W
YGL006W	345.123	303.553	1095.07	1093.67	1.75442	3.45551e-44	1.79737e-42	S000002974	YGL006W	PMC1	Plasma Membrane Calcium
YDL085W	212.34	192.228	673.801	640.588	1.69981	4.59577e-44	2.37315e-42	S000002243	YDL085W	NDE2	NADH Dehydrogenase
YLR070C	46.7148	43.4183	134.451	124.107	1.51998	5.28638e-44	2.71013e-42	S000004060	YLR070C	XYL2
YFR022W	43.4589	41.3902	116.824	119.607	1.47787	1.53309e-43	7.63971e-42	S000001918	YFR022W	ROG3	Revertant Of Glycogen synthase kinase mutation
YER145C	137.738	120.264	474.08	413.217	1.78183	1.55886e-43	7.71418e-42	S000000947	YER145C	FTR1	Fe TRansporter
YPR111W	38.8582	34.5544	101.852	109.186	1.52216	2.03204e-43	9.98644e-42	S000006315	YPR111W	DBF20	DumbBell Forming
YJR115W	49.6167	45.3714	130.91	131.923	1.46763	2.04735e-43	9.99274e-42	S000003876	YJR115W
YBR004C	64.976	60.0946	180.693	223.503	1.69161	5.43704e-43	2.63567e-41	S000000208	YBR004C	GPI18	GlycosylPhosphatidylInositol
YAR020C	4.9546	5.03292	28.0259	26.5267	2.44783	1.05174e-42	5.06397e-41	S000000073	YAR020C	PAU7	seriPAUperin family
YLR213C	13.0235	10.817	49.1928	49.6586	2.0491	1.12387e-42	5.37495e-41	S000004203	YLR213C	CRR1	CRH-Related
YJL165C	116.504	111.776	331.001	346.821	1.56989	2.16017e-42	1.02622e-40	S000003701	YJL165C	HAL5	HALotolerance
YJR092W	35.4608	27.5684	106.72	101.291	1.72091	2.94866e-42	1.39153e-40	S000003852	YJR092W	BUD4	BUD site selection
YCR048W	56.1285	50.179	172.728	148.423	1.59466	3.20889e-42	1.50438e-40	S000000644	YCR048W	ARE1	Acyl-coenzyme A: cholesterol acyl transferase-Related Enzyme
YGL158W	1.69872	1.50236	14.4555	16.0266	3.24079	5.56355e-42	2.5414e-40	S000003126	YGL158W	RCK1	Radiation sensitivity Complementing Kinase
YGR161C	161.874	160.302	464.714	495.639	1.5756	1.43983e-41	6.49381e-40	S000003393	YGR161C	RTS3
YOR192C	27.9581	26.3665	80.8326	77.7643	1.54506	1.67356e-41	7.50049e-40	S000005718	YOR192C	THI72	THI7 homologue 2
YPR154W	104.754	110.799	309.244	317.215	1.53919	3.06822e-41	1.35802e-39	S000006358	YPR154W	PIN3	Psi+ INducibility
YJL051W	35.1776	30.8736	96.2468	91.1066	1.50312	5.01779e-41	2.19367e-39	S000003587	YJL051W	IRC8	Increased Recombination Centers
YHL020C	116.999	99.6068	364.853	333.242	1.68803	1.25197e-40	5.37441e-39	S000001012	YHL020C	OPI1	OverProducer of Inositol
YNL172W	64.4098	57.3152	160.559	168.792	1.43524	2.09639e-40	8.8922e-39	S000005116	YNL172W	APC1	Anaphase Promoting Complex subunit
YJR005C-A	1.20326	1.12677	14.8242	21.7108	3.95732	2.21457e-40	9.33789e-39	S000028523	YJR005C-A	LSO1	Late-annotated Small Open reading frame
YLL031C	58.3227	48.6015	157.093	149.844	1.52049	2.59651e-40	1.08839e-38	S000003954	YLL031C	GPI13	GlycosylPhosphatidylInositol anchor biosynthesis
YDR207C	42.9634	43.3432	114.537	110.212	1.38077	2.79716e-40	1.15887e-38	S000002615	YDR207C	UME6	Unscheduled Meiotic gene Expression
YMR036C	65.0468	59.4185	161.591	180.871	1.45947	9.15663e-40	3.77168e-38	S000004639	YMR036C	MIH1	Mitotic Inducer Homolog
YIL099W	47.9888	43.2681	151.487	126.712	1.60782	1.38112e-39	5.65623e-38	S000001361	YIL099W	SGA1	Sporulation-specific GlycoAmylase
YIL066C	25.9055	26.7421	73.8999	77.6854	1.52539	3.17511e-39	1.29291e-37	S000001328	YIL066C	RNR3	RiboNucleotide Reductase
YHL028W	61.7201	51.6062	177.079	156.792	1.55818	1.68953e-38	6.72603e-37	S000001020	YHL028W	WSC4	cell Wall integrity and Stress response Component
YGR144W	7.078	7.36159	32.0823	31.0268	2.12708	1.8228e-38	7.17639e-37	S000003376	YGR144W	THI4	THIamine metabolism
YLR267W	137.101	120.415	367.729	372.716	1.52342	8.52744e-38	3.32058e-36	S000004257	YLR267W	BOP2	Bypass Of Pam1
YMR306W	35.6731	36.207	94.2555	90.8698	1.36487	1.2502e-37	4.76414e-36	S000004923	YMR306W	FKS3
YMR244W	4.10524	2.32867	23.1582	22.5003	2.81601	1.76514e-37	6.69064e-36	S000004858	YMR244W
YML118W	44.7329	37.0333	116.676	111.949	1.48229	2.01122e-37	7.54315e-36	S000004587	YML118W	NGL3
YDL039C	23.6405	20.8829	67.8522	66.8694	1.59599	5.96317e-37	2.22479e-35	S000002197	YDL039C	PRM7	Pheromone-Regulated Membrane protein
YPL119C	89.2535	79.0244	229.222	220.345	1.41728	6.35394e-37	2.35824e-35	S000006040	YPL119C	DBP1	Dead Box Protein
YOL085W-A	30.2938	25.7656	81.7176	99.7909	1.69316	9.26256e-37	3.41995e-35	S000028708	YOL085W-A
YHR033W	66.6039	58.0664	224.06	175.187	1.67891	1.20667e-36	4.43234e-35	S000001075	YHR033W
YBR295W	77.3625	69.4844	184.381	209.45	1.42257	1.26636e-36	4.62774e-35	S000000499	YBR295W	PCA1	P-type Cation-transporting ATPase
YGR108W	31.4971	26.9674	80.0213	81.5538	1.46505	1.48343e-36	5.36594e-35	S000003340	YGR108W	CLB1	CycLin B
YHL040C	55.9869	53.1837	147.21	132.949	1.35953	1.54224e-36	5.55051e-35	S000001032	YHL040C	ARN1	AFT1 ReguloN
YCR007C	47.9888	41.9911	117.93	131.844	1.47182	2.06598e-36	7.39809e-35	S000000600	YCR007C
YDR523C	8.98905	9.91561	36.2124	40.5006	2.02015	2.15164e-36	7.66628e-35	S000002931	YDR523C	SPS1	SPorulation Specific
YBR301W	0.778579	0.600946	9.21904	10.737	3.83016	2.46798e-36	8.74968e-35	S000000505	YBR301W	PAU24	seriPAUperin family
YHR137W	83.4496	79.9258	210.563	199.74	1.32835	2.70919e-36	9.55726e-35	S000001179	YHR137W	ARO9	AROmatic amino acid requiring
YBR294W	43.6005	44.47	106.867	115.66	1.33691	2.8129e-36	9.87424e-35	S000000498	YBR294W	SUL1	SULfate
YMR001C	28.2412	25.9158	73.9736	76.4222	1.47241	2.91185e-36	1.01715e-34	S000004603	YMR001C	CDC5	Cell Division Cycle
YMR316C-A	1.0617	1.57748	11.8004	13.3423	3.24881	3.92644e-36	1.36487e-34	S000004933	YMR316C-A
YOL014W	7.21956	8.71372	33.4836	38.369	2.17308	7.30901e-36	2.49206e-34	S000005374	YOL014W
YIL169C	401.676	299.421	1578.67	1295.94	2.03556	7.77766e-36	2.62671e-34	S000001431	YIL169C		Condition Specific Secretion
YER158C	82.2463	79.2497	209.088	195.477	1.32477	1.0646e-35	3.57847e-34	S000000960	YER158C
YGR249W	22.0833	17.127	71.2448	64.6588	1.7913	3.31516e-35	1.08866e-33	S000003481	YGR249W	MGA1
YKL178C	6.44098	5.40851	26.6246	30.1583	2.25599	3.39965e-35	1.11128e-33	S000001661	YKL178C	STE3	STErile
YDR270W	61.9325	52.3574	149.054	148.107	1.37769	5.38289e-35	1.73568e-33	S000002678	YDR270W	CCC2	Cross-Complements Ca(2+) phenotype of csg1
YGR154C	40.7693	38.2352	99.5657	95.054	1.3002	5.60754e-35	1.79997e-33	S000003386	YGR154C	GTO1	Glutathione Transferase Omega-like
YPR159W	155.928	150.988	415.004	397.348	1.40419	1.18425e-34	3.75065e-33	S000006363	YPR159W	KRE6	Killer toxin REsistant
YPR192W	50.183	52.0569	184.16	139.107	1.66111	1.38993e-34	4.38258e-33	S000006396	YPR192W	AQY1	AQuaporin of Yeast
YLL051C	60.0214	55.6626	137.179	142.897	1.27501	1.77291e-34	5.56555e-33	S000003974	YLL051C	FRE6	Ferric REductase
YNL278W	54.6421	48.9771	138.064	126.87	1.35388	3.8428e-34	1.1958e-32	S000005222	YNL278W	CAF120	CCR4 Associated Factor
YNR015W	40.9816	39.9629	109.375	96.3962	1.34611	3.89994e-34	1.2083e-32	S000005298	YNR015W	SMM1	Suppressor of Mitochondrial Mutation
YLR337C	136.676	136.264	355.56	346.584	1.36314	4.35902e-34	1.34469e-32	S000004329	YLR337C	VRP1	VeRProlin
YLL057C	34.9653	34.93	84.0777	95.7646	1.36273	6.6147e-34	2.0058e-32	S000003980	YLL057C	JLP1	dnaJ-Like Protein
YGL183C	2.40652	2.40378	14.7505	17.6055	2.74373	1.66337e-33	4.95948e-32	S000003151	YGL183C	MND1	Meiotic Nuclear Divisions
YGR059W	5.80396	5.85922	24.8545	24.8688	2.09032	2.2286e-33	6.56239e-32	S000003291	YGR059W	SPR3	SPorulation Regulated
YLR121C	140.286	147.908	381.005	364.584	1.37141	2.53208e-33	7.42534e-32	S000004111	YLR121C	YPS3	YaPSin
YKL149C	28.8074	30.5731	79.6525	74.8432	1.37995	2.74335e-33	8.01193e-32	S000001632	YKL149C	DBR1	DeBRanching
YHR097C	323.677	303.778	908.186	837.091	1.47583	2.89646e-33	8.42456e-32	S000001139	YHR097C
YGR146C	76.23	80.3765	179.587	197.529	1.26777	2.92067e-33	8.46045e-32	S000003378	YGR146C	ECL1	Extends Chronological Lifespan
YCR068W	82.1047	63.3998	250.979	212.608	1.67121	3.70301e-33	1.0682e-31	S000000664	YCR068W	ATG15	AuTophaGy related
YAL018C	15.5008	11.2677	50.8154	53.685	1.96146	5.29753e-33	1.50399e-31	S000000016	YAL018C	LDS1	Lipid Droplets in Sporulation
YGR212W	21.1632	22.9862	61.8782	71.3695	1.59331	5.84222e-33	1.63904e-31	S000003444	YGR212W	SLI1	Sphingosine-Like Immunosuppressant resistant gene
YDR019C	151.469	149.11	390.592	376.348	1.35132	6.82147e-33	1.90627e-31	S000002426	YDR019C	GCV1	GlyCine cleaVage
YBR157C	62.8526	60.6204	146.251	141.081	1.21833	9.87565e-33	2.73828e-31	S000000361	YBR157C	ICS2	Increased Copper Sensitivity
YIL057C	253.605	197.411	739.515	704.063	1.67819	1.01403e-32	2.80078e-31	S000001319	YIL057C	RGI2	Respiratory growth induced
YAL051W	85.0775	81.0526	194.411	199.819	1.24641	1.19298e-32	3.26969e-31	S000000048	YAL051W	OAF1	Oleate-Activated transcription Factor
YPL276W	1.69872	1.57748	11.6529	13.816	2.94873	1.32955e-32	3.63004e-31	S000006197	YPL276W
YMR232W	13.9437	13.0706	43.0714	46.3428	1.7251	1.33664e-32	3.63545e-31	S000004845	YMR232W	FUS2	cell FUSion
YER015W	103.905	101.41	253.856	241.346	1.27011	1.86848e-32	5.04349e-31	S000000817	YER015W	FAA2	Fatty Acid Activation
YGL045W	126.271	115.983	315.218	315.478	1.38019	2.38395e-32	6.41059e-31	S000003013	YGL045W	RIM8	Regulator of IME2
YJL144W	109.992	114.63	293.903	276.951	1.34571	3.07723e-32	8.24375e-31	S000003680	YJL144W
YGL236C	36.027	36.6577	99.1969	86.5276	1.3538	3.57737e-32	9.5477e-31	S000003205	YGL236C	MTO1	Mitochondrial Translation Optimization
YDR256C	321.836	270.2	899.41	841.512	1.55597	3.81133e-32	1.01341e-30	S000002664	YDR256C	CTA1	CaTalase A
YOL105C	41.6894	43.3432	118.52	100.107	1.36289	3.95213e-32	1.04695e-30	S000005465	YOL105C	WSC3	cell Wall integrity and Stress response Component
YKR009C	250.136	220.472	675.277	627.878	1.46929	5.74784e-32	1.51141e-30	S000001717	YKR009C	FOX2	Fatty acid OXidation
YFL055W	42.8219	34.7797	99.7132	102.791	1.38234	8.58898e-32	2.24194e-30	S000001839	YFL055W	AGP3	high-Affinity Glutamine Permease
YLR131C	52.094	42.3667	130.984	121.739	1.41884	1.03303e-31	2.68663e-30	S000004121	YLR131C	ACE2	Activator of CUP1 Expression
YDR348C	94.2081	97.6537	224.723	231.951	1.25107	1.34813e-31	3.49337e-30	S000002756	YDR348C	PAL1	Pears And Lemons
YLR154W-F	59.6675	43.0428	153.11	170.45	1.65413	1.41414e-31	3.65114e-30	S000028843	YLR154W-F
YCL036W	27.4626	25.2397	79.1363	68.6852	1.48753	1.44969e-31	3.72943e-30	S000000541	YCL036W	GFD2	Great for Full DEAD box protein activity
YEL073C	40.5569	35.606	95.0668	116.686	1.47384	2.91144e-31	7.46293e-30	S000000799	YEL073C
YBR108W	106.807	98.2547	273.4	246.714	1.34262	3.99857e-31	1.01402e-29	S000000312	YBR108W	AIM3	Altered Inheritance rate of Mitochondria
YPL164C	69.0105	58.0664	171.843	154.423	1.3598	5.21108e-31	1.30754e-29	S000006085	YPL164C	MLH3	MutL Homolog
YOL019W	105.958	103.513	284.094	249.635	1.34938	7.0136e-31	1.73538e-29	S000005379	YOL019W
YGL180W	47.3518	49.9536	111.735	117.554	1.23654	7.8753e-31	1.9285e-29	S000003148	YGL180W	ATG1	AuTophaGy related
YBR150C	73.6819	65.6533	160.854	164.608	1.22331	9.99128e-31	2.42996e-29	S000000354	YBR150C	TBS1	ThiaBendazole Sensitive
YOR378W	29.7984	26.3665	73.0148	70.9747	1.35714	1.52318e-30	3.67938e-29	S000005905	YOR378W	AMF1	AMmonium Facilitator
YDR123C	32.7003	26.066	89.0191	78.159	1.50708	1.62254e-30	3.893e-29	S000002530	YDR123C	INO2	INOsitol requiring
YPL258C	42.6095	45.747	99.0494	109.738	1.24051	2.99304e-30	7.15718e-29	S000006179	YPL258C	THI21	THIamine metabolism
YBL098W	44.8037	42.4418	97.0581	102.554	1.19332	3.83935e-30	9.11973e-29	S000000194	YBL098W	BNA4	Biosynthesis of Nicotinic Acid
YDR234W	105.108	106.367	243.604	243.083	1.20246	4.12944e-30	9.77622e-29	S000002642	YDR234W	LYS4	LYSine requiring
YDR218C	16.6333	13.2208	51.4791	66.7115	1.98229	5.95432e-30	1.40035e-28	S000002626	YDR218C	SPR28	SPorulation Regulated
YFL050C	62.2864	60.3951	133.861	141.081	1.16379	6.07431e-30	1.42387e-28	S000001844	YFL050C	ALR2	ALuminum Resistance
YHL047C	105.25	96.5269	238.589	232.582	1.22322	6.46027e-30	1.50937e-28	S000001039	YHL047C	ARN2	AFT1 ReguloN
YNL034W	7.078	6.68552	27.9521	25.4214	1.95375	1.01221e-29	2.34189e-28	S000004979	YNL034W
YBL106C	36.027	32.0755	79.9476	80.8433	1.23831	2.03799e-29	4.65472e-28	S000000202	YBL106C	SRO77	Suppressor of rho3
YJR061W	61.6493	64.3763	137.696	141.555	1.14785	2.17888e-29	4.96061e-28	S000003822	YJR061W		MaNNosyltransferase regulator
YIL155C	808.944	782.582	2461.71	2059.06	1.50615	2.89124e-29	6.49935e-28	S000001417	YIL155C	GUT2	Glycerol UTilization
YNL092W	21.7294	20.5824	56.6418	62.5272	1.49263	4.28916e-29	9.58136e-28	S000005036	YNL092W
YOR384W	63.4188	50.5546	149.644	141.397	1.35164	5.53318e-29	1.22833e-27	S000005911	YOR384W	FRE5	Ferric REductase
YJR151C	48.555	48.902	130.763	110.212	1.30634	1.5243e-28	3.31164e-27	S000003912	YJR151C	DAN4	Delayed ANaerobic
YDL133W	80.6184	79.7756	170.294	190.661	1.16984	1.90118e-28	4.11787e-27	S000002291	YDL133W	SRF1	Spo14 Regulatory Factor
YNL009W	69.6475	57.841	152.151	153.239	1.25945	2.01825e-28	4.33194e-27	S000004954	YNL009W	IDP3	Isocitrate Dehydrogenase
YPR006C	128.961	116.283	298.107	297.873	1.28078	2.7191e-28	5.77874e-27	S000006210	YPR006C	ICL2	IsoCitrate Lyase
YNL014W	152.46	130.405	359.321	352.189	1.33048	3.28847e-28	6.87203e-27	S000004959	YNL014W	HEF3	Homolog of EF-3
YML099C	65.2591	69.1088	144.038	150.95	1.13448	4.56056e-28	9.41987e-27	S000004565	YML099C	ARG81	ARGinine requiring
YDL211C	21.5879	24.2632	59.7394	69.4747	1.49461	6.09502e-28	1.25529e-26	S000002370	YDL211C
YOR116C	100.578	97.804	217.569	229.661	1.1725	6.62056e-28	1.35181e-26	S000005642	YOR116C	RPO31	RNA POlymerase
YJL094C	143.683	113.654	347.447	347.847	1.43355	7.40838e-28	1.50405e-26	S000003630	YJL094C	KHA1
YLR106C	211.703	175.251	499.967	537.955	1.4232	8.27661e-28	1.6708e-26	S000004096	YLR106C	MDN1	MiDasiN
YJR078W	92.651	74.6675	237.999	207.793	1.41333	8.91472e-28	1.78947e-26	S000003839	YJR078W	BNA2	Biosynthesis of Nicotinic Acid
YIL162W	273.281	298.895	698.14	732.721	1.32237	1.12029e-27	2.22994e-26	S000001424	YIL162W	SUC2	SUCrose
YBR114W	65.1883	63.4749	135.778	149.134	1.14644	1.17569e-27	2.33369e-26	S000000318	YBR114W	RAD16	RADiation sensitive
YMR191W	425.529	355.685	1049.27	1039.99	1.4191	1.36798e-27	2.70033e-26	S000004803	YMR191W	SPG5	Stationary Phase Gene
YNL212W	150.974	153.617	346.046	371.453	1.23602	1.75058e-27	3.44602e-26	S000005156	YNL212W	VID27	Vacuolar Import and Degradation
YOL154W	13.8729	12.695	39.0887	43.8164	1.63972	2.14291e-27	4.20671e-26	S000005514	YOL154W	ZPS1	Zinc- and pH-regulated Surface protein
YDR380W	247.801	239.853	652.487	574.193	1.33082	2.56036e-27	4.99866e-26	S000002788	YDR380W	ARO10	AROmatic amino acid requiring
YJL079C	176.525	151.964	549.971	428.059	1.57393	2.64169e-27	5.14335e-26	S000003615	YJL079C	PRY1	Pathogen Related in Yeast
YOR100C	278.024	241.731	687.224	645.957	1.35885	2.93407e-27	5.68157e-26	S000005626	YOR100C	CRC1	CaRnitine Carrier
YLR273C	30.8601	28.0942	75.0799	69.4747	1.29335	4.10483e-27	7.85985e-26	S000004263	YLR273C	PIG1	Protein Interacting with Gsy2p
YHR202W	86.7762	77.1464	179.439	179.766	1.13129	4.11412e-27	7.85985e-26	S000001245	YHR202W
YLR438W	72.9034	70.3858	184.602	154.897	1.24457	4.12558e-27	7.86066e-26	S000004430	YLR438W	CAR2	Catabolism of ARginine
YMR190C	52.1648	48.1508	109.596	119.923	1.19325	4.88115e-27	9.22628e-26	S000004802	YMR190C	SGS1	Slow Growth Suppressor
YGR032W	546.28	421.338	1447.76	1388.31	1.55128	6.25236e-27	1.17558e-25	S000003264	YGR032W	GSC2	Glucan Synthase of Cerevisiae
YCR089W	30.9308	33.3525	72.4986	77.7643	1.22496	6.33033e-27	1.1871e-25	S000000685	YCR089W	FIG2	Factor-Induced Gene
YLR308W	1.0617	1.05166	8.40777	8.68434	3.00408	6.88522e-27	1.2844e-25	S000004299	YLR308W	CDA2	Chitin DeAcetylase
YLR081W	7.92735	7.8123	26.1821	27.4741	1.76763	8.57481e-27	1.59541e-25	S000004071	YLR081W	GAL2	GALactose metabolism
YML082W	45.5115	42.2165	96.5418	94.3435	1.12106	1.25939e-26	2.33101e-25	S000004547	YML082W
YBR117C	198.538	179.533	533.451	448.822	1.37741	2.45782e-26	4.4794e-25	S000000321	YBR117C	TKL2	TransKetoLase
YKR103W	16.8456	15.3241	44.5464	51.4744	1.5757	2.72982e-26	4.94979e-25	S000001811	YKR103W	NFT1	New Full-length MRP-type Transporter
YPL021W	0.849359	0.600946	6.85897	8.92118	3.41802	2.97947e-26	5.38876e-25	S000005942	YPL021W	ECM23	ExtraCellular Mutant
YNL318C	0.42468	0.901419	7.00647	7.10537	3.4071	4.14471e-26	7.45838e-25	S000005262	YNL318C	HXT14	HeXose Transporter
YLR417W	30.6477	29.5215	70.7285	67.6589	1.2013	5.84236e-26	1.03822e-24	S000004409	YLR417W	VPS36	Vacuolar Protein Sorting
YBR008C	66.6039	77.1464	156.355	167.371	1.17148	6.12889e-26	1.08643e-24	S000000212	YBR008C	FLR1	FLuconazole Resistance
YLR194C	354.608	388.887	889.232	902.934	1.26934	1.01152e-25	1.77978e-24	S000004184	YLR194C		Novel Cell Wall protein
YBL042C	74.7436	72.4891	164.689	150.239	1.09693	1.48595e-25	2.59532e-24	S000000138	YBL042C	FUI1	5-FlUorourIdine resistance
YOL067C	43.2466	38.0098	91.0104	89.6855	1.15211	1.86152e-25	3.23541e-24	S000005428	YOL067C	RTG1	ReTroGrade regulation
YBL063W	34.3283	37.2586	76.4812	83.5275	1.16034	2.28557e-25	3.95315e-24	S000000159	YBL063W	KIP1	KInesin related Protein
YDR077W	6108.66	6536.86	17777.5	15253.3	1.38518	2.33485e-25	4.0286e-24	S000002484	YDR077W	SED1	Suppression of Exponential Defect
YNR007C	133.066	130.18	293.313	302.847	1.17915	2.8148e-25	4.845e-24	S000005290	YNR007C	ATG3	AuTophaGy related
YKL188C	88.6165	86.4611	179.587	191.055	1.08174	3.02646e-25	5.19677e-24	S000001671	YKL188C	PXA2	PeroXisomal ABC-transporter
YBL075C	934.295	810.225	2404.7	2152.14	1.38517	3.42912e-25	5.84591e-24	S000000171	YBL075C	SSA3	Stress-Seventy subfamily A
YIL046W	190.186	161.129	463.755	417.48	1.32659	4.23074e-25	7.17815e-24	S000001308	YIL046W	MET30	METhionine requiring
YDR034C-D	1.7695	1.72772	10.6203	9.86857	2.54458	4.24214e-25	7.18041e-24	S000007345	YDR034C-D
YLR133W	81.8924	77.522	176.489	161.055	1.08221	5.14467e-25	8.68741e-24	S000004123	YLR133W	CKI1	Choline KInase
YLR307W	11.254	9.31466	34.7374	31.9742	1.69516	5.69514e-25	9.59423e-24	S000004298	YLR307W	CDA1	Chitin DeAcetylase
YIL131C	16.5625	16.0753	46.759	42.948	1.45833	5.72397e-25	9.62006e-24	S000001393	YIL131C	FKH1	ForK head Homolog
YHR018C	321.907	282.369	786.421	714.958	1.31292	6.7333e-25	1.12369e-23	S000001060	YHR018C	ARG4	ARGinine requiring
YLR107W	76.23	74.0666	151.414	162.239	1.06098	7.60108e-25	1.25966e-23	S000004097	YLR107W	REX3	Rna EXonuclease
YAL063C	83.8742	70.9867	173.392	167.845	1.13922	9.17392e-25	1.5063e-23	S000000059	YAL063C	FLO9	FLOcculation
YBL101C	79.4151	74.8178	158.863	159.555	1.04548	1.22449e-24	2.0013e-23	S000000197	YBL101C	ECM21	ExtraCellular Mutant
YNL058C	40.84	35.0802	85.9952	83.0539	1.15389	1.45207e-24	2.36243e-23	S000005003	YNL058C
YLR214W	52.3064	42.9676	107.973	117.318	1.2404	1.45959e-24	2.36926e-23	S000004204	YLR214W	FRE1	Ferric REductase
YKL015W	61.8617	61.4467	124.273	129.712	1.04219	1.65833e-24	2.68575e-23	S000001498	YKL015W	PUT3	Proline UTilization
YGL126W	49.8291	49.6532	129.288	106.028	1.24239	2.18831e-24	3.51214e-23	S000003094	YGL126W	SCS3	Suppressor of Choline Sensitivity
YFL033C	80.3352	77.522	158.42	166.818	1.04253	2.94274e-24	4.70179e-23	S000001861	YFL033C	RIM15	Regulator of IME2
YCL014W	50.82	39.5873	107.531	106.738	1.24364	3.22827e-24	5.14646e-23	S000000520	YCL014W	BUD3	BUD site selection
YHR096C	586.058	370.558	1948.17	1691	1.92749	4.93246e-24	7.75909e-23	S000001138	YHR096C	HXT5	HeXose Transporter
YOR324C	45.9362	43.193	91.2317	93.4751	1.05063	5.52894e-24	8.60245e-23	S000005851	YOR324C	FRT1	Functionally Related to TCP1
YKL221W	105.462	81.5033	226.788	243.556	1.33028	5.7401e-24	8.91154e-23	S000001704	YKL221W	MCH2	MonoCarboxylate transporter Homologue
YHR211W	50.4661	47.7752	101.704	99.3962	1.03315	5.90858e-24	9.15316e-23	S000001254	YHR211W	FLO5	FLOcculation
YLR237W	94.562	82.4047	217.422	189.003	1.19927	6.26363e-24	9.66118e-23	S000004227	YLR237W	THI7	THIamine metabolism
YIL153W	77.5748	74.8178	184.086	154.344	1.15118	7.25331e-24	1.11635e-22	S000001415	YIL153W	RRD1	Resistant to Rapamycin Deletion
YBL082C	24.2067	22.235	61.8045	55.4219	1.33531	9.72704e-24	1.49064e-22	S000000178	YBL082C	ALG3	Asparagine Linked Glycosylation
YBR038W	51.1739	40.7892	121.47	105.633	1.30345	1.40715e-23	2.13803e-22	S000000242	YBR038W	CHS2	CHitin Synthase
YML089C	4.31758	4.50709	23.1582	17.2897	2.19614	1.41142e-23	2.13996e-22	S000004554	YML089C
YHR216W	24.2775	28.4698	62.1732	66.6326	1.28853	1.47437e-23	2.23064e-22	S000001259	YHR216W	IMD2	IMP Dehydrogenase
YNL332W	6.0163	4.58221	19.9869	19.5792	1.89524	1.90459e-23	2.87544e-22	S000005276	YNL332W	THI12	THIamine metabolism
YBL052C	39.1413	39.7376	79.8	90.0013	1.10556	1.94447e-23	2.92946e-22	S000000148	YBL052C	SAS3	Something About Silencing
YAL067C	23.5697	20.5073	55.1668	56.4482	1.33893	2.04098e-23	3.06837e-22	S000000062	YAL067C	SEO1	Suppressor of sulfoxyde EthiOnine resistance
YJL105W	17.8365	17.127	44.1777	45.6323	1.36003	3.70311e-23	5.49757e-22	S000003641	YJL105W	SET4	SET domain-containing
YKR061W	50.82	50.179	102.811	118.896	1.13369	3.74774e-23	5.55226e-22	S000001769	YKR061W	KTR2	Kre Two Related
YOL157C	12.5988	10.4414	33.6311	39.3164	1.65957	4.03519e-23	5.96573e-22	S000005517	YOL157C	IMA2	IsoMAltase
YFL053W	12.0326	13.8218	36.5812	36.0795	1.4915	4.38307e-23	6.45325e-22	S000001841	YFL053W	DAK2	DihydroxyAcetone Kinase
YHR102W	88.121	88.6395	182.611	170.924	1.00015	6.75343e-23	9.86167e-22	S000001144	YHR102W	KIC1	Kinase that Interacts with Cdc31p
YMR101C	9.76763	8.86395	27.7309	28.0267	1.57931	7.31152e-23	1.0633e-21	S000004707	YMR101C	SRT1	Suppressor of Rer-Two
YBR092C	39.9907	38.6108	104.286	82.6591	1.25026	8.21868e-23	1.19037e-21	S000000296	YBR092C	PHO3	PHOsphate metabolism
YBR214W	344.911	348.474	859.805	756.801	1.22127	8.41125e-23	1.21579e-21	S000000418	YBR214W	SDS24	homolog of S. pombe SDS23
YIL072W	32.9127	31.1741	67.8522	74.6853	1.15222	1.11079e-22	1.59587e-21	S000001334	YIL072W	HOP1	HOmolog Pairing
YGR110W	105.321	100.358	217.938	206.687	1.04569	1.1859e-22	1.69015e-21	S000003342	YGR110W	CLD1	CardioLipin-specific Deacylase
YLR136C	7.85657	8.86395	25.5183	30.632	1.74679	1.62981e-22	2.31355e-21	S000004126	YLR136C	TIS11	similar to the mammalian TPA Induced Sequence gene family
YNL077W	162.935	145.204	336.163	339.4	1.13227	1.85553e-22	2.62872e-21	S000005021	YNL077W	APJ1	Anti-Prion DnaJ
YJL213W	29.8691	28.7703	63.132	68.0536	1.16079	1.98846e-22	2.81146e-21	S000003749	YJL213W
YOL155C	1451.27	1301.57	3851.35	3189.13	1.35474	2.38348e-22	3.34344e-21	S000005515	YOL155C	HPF1	Haze Protective Factor
YJL219W	5.94552	5.03292	18.5118	20.4477	1.82267	2.46975e-22	3.45087e-21	S000003755	YJL219W	HXT9	HeXose Transporter
YOR237W	13.7313	10.3663	37.835	48.7902	1.84246	2.87602e-22	3.98726e-21	S000005763	YOR237W	HES1	Homologous to kES1
YDR277C	131.509	110.724	282.398	270.399	1.19003	3.21991e-22	4.42955e-21	S000002685	YDR277C	MTH1	MSN Three Homolog
YNL202W	47.2102	38.6859	100.967	91.8961	1.16604	3.41006e-22	4.6821e-21	S000005146	YNL202W	SPS19	SPorulation-Specific
YJL163C	132.217	105.616	311.161	276.557	1.30486	3.84867e-22	5.26404e-21	S000003699	YJL163C
YOR255W	2.54808	2.55402	11.0629	14.1318	2.2978	4.36866e-22	5.9638e-21	S000005781	YOR255W	OSW1	Outer Spore Wall
YIR014W	20.3846	17.3523	49.6353	47.606	1.3641	4.56497e-22	6.21988e-21	S000001453	YIR014W
YER047C	82.8125	69.1088	167.934	159.002	1.10512	4.72507e-22	6.42574e-21	S000000849	YER047C	SAP1	Sin1 Associated Protein
YMR006C	117.99	99.4566	282.472	238.03	1.25903	5.93533e-22	8.01044e-21	S000004608	YMR006C	PLB2	PhosphoLipase B
YBR046C	332.1	280.792	790.404	698.852	1.2808	7.37083e-22	9.87303e-21	S000000250	YBR046C	ZTA1	ZeTA-crystallin
YJL019W	34.9653	35.3807	72.5723	71.8432	1.03763	7.84971e-22	1.04751e-20	S000003556	YJL019W	MPS3	MonoPolar Spindle
YGR014W	110.841	118.086	255.847	231.24	1.0895	8.68991e-22	1.15315e-20	S000003246	YGR014W	MSB2	Multicopy Suppression of a Budding defect
YLR353W	22.9327	18.9298	55.7568	52.0271	1.36296	1.08944e-21	1.43236e-20	S000004345	YLR353W	BUD8	BUD site selection
YFR026C	11.5371	13.8969	34.8111	39.7111	1.55118	1.16568e-21	1.52695e-20	S000001922	YFR026C	ULI1	Upr-L-Inducible gene
YOL051W	166.899	157.072	389.781	334.9	1.16146	1.87027e-21	2.44095e-20	S000005411	YOL051W	GAL11	GALactose metabolism
YMR136W	386.812	316.999	851.397	832.275	1.25823	2.27185e-21	2.93816e-20	S000004744	YMR136W	GAT2
YIL047C	155.999	123.269	373.556	321.715	1.31567	2.50252e-21	3.21895e-20	S000001309	YIL047C	SYG1	Suppressor of Yeast Gpa1
YBR071W	176.667	192.152	385.651	414.085	1.11663	2.51324e-21	3.22319e-20	S000000275	YBR071W
YIL013C	72.1956	57.5406	140.867	144.871	1.13818	2.54501e-21	3.25596e-20	S000001275	YIL013C	PDR11	Pleiotropic Drug Resistance
YBR021W	45.2992	40.639	87.9866	87.5539	1.02965	2.59997e-21	3.32032e-20	S000000225	YBR021W	FUR4	5-FlUoRouridine sensitivity
YDR402C	6.86566	5.18316	20.2819	23.9214	1.8696	3.41807e-21	4.2807e-20	S000002810	YDR402C	DIT2	DITyrosine
YML066C	13.6605	14.3476	35.4749	37.1058	1.37335	4.09196e-21	5.10671e-20	S000004531	YML066C	SMA2	Spore Membrane Assembly
YJL216C	13.5898	12.8452	33.9998	35.4479	1.39205	4.77834e-21	5.93214e-20	S000003752	YJL216C	IMA5	IsoMAltase
YLR142W	564.329	483.912	1255.34	1176.1	1.21378	5.28446e-21	6.53768e-20	S000004132	YLR142W	PUT1	Proline UTilization
YEL060C	1052.5	1058.34	2491.06	2264.48	1.1718	5.32876e-21	6.58106e-20	S000000786	YEL060C	PRB1	PRoteinase B
YKL105C	95.9068	79.3249	185.34	187.74	1.0896	5.38627e-21	6.64058e-20	S000001588	YKL105C	SEG2	Stability of Eisosomes Guaranteed
YPL027W	6.51176	6.986	20.3556	23.3688	1.69421	5.74707e-21	7.06096e-20	S000005948	YPL027W	SMA1	Spore Membrane Assembly
YNR019W	134.977	126.274	268.606	279.715	1.06936	5.86037e-21	7.18778e-20	S000005302	YNR019W	ARE2	Acyl-coenzyme A: cholesterol acyl transferase-Related Enzyme
YPL130W	0.63702	1.35213	6.93272	7.10537	2.82049	6.19525e-21	7.58546e-20	S000006051	YPL130W	SPO19	SPOrulation
YHL035C	65.0468	67.0806	124.936	140.923	1.00844	6.67716e-21	8.1475e-20	S000001027	YHL035C	VMR1	Vacuolar Multidrug Resistance
YLR381W	37.2303	37.484	77.3662	72.6326	1.00567	8.54051e-21	1.02977e-19	S000004373	YLR381W	CTF3	Chromosome Transmission Fidelity
YFL041W	129.952	108.321	271.409	258.241	1.15209	8.92649e-21	1.07088e-19	S000001853	YFL041W	FET5	FErrous Transport
YGL139W	68.9397	61.8223	139.982	125.686	1.02242	1.73765e-20	2.03995e-19	S000003107	YGL139W	FLC3	FLavin Carrier
YPL265W	867.408	648.346	2140	1917.58	1.42053	2.03322e-20	2.37243e-19	S000006186	YPL265W	DIP5	DIcarboxylic amino acid Permease
YJR155W	171.854	145.204	350.619	342.716	1.12855	2.03418e-20	2.37243e-19	S000003916	YJR155W	AAD10	Aryl-Alcohol Dehydrogenase
YNR056C	15.9963	18.7044	42.8501	44.9217	1.33935	2.05801e-20	2.3963e-19	S000005339	YNR056C	BIO5	BIOtin
YGR258C	110.488	98.9307	206.58	221.845	1.03221	2.75076e-20	3.18213e-19	S000003490	YGR258C	RAD2	RADiation sensitivity
YGL021W	53.7928	41.9911	106.646	103.265	1.13079	3.08844e-20	3.56697e-19	S000002989	YGL021W	ALK1
YPL222W	242.846	204.397	533.746	485.77	1.18861	3.23498e-20	3.72414e-19	S000006143	YPL222W	FMP40	Found in Mitochondrial Proteome
YOR343W-B	2.05262	2.10331	9.66156	9.47382	2.19858	3.91194e-20	4.48897e-19	S000007356	YOR343W-B
YKR075C	107.09	77.1464	234.09	223.03	1.31041	5.02242e-20	5.72637e-19	S000001783	YKR075C
YBR045C	34.0452	35.9816	69.3272	73.1063	1.02424	5.23294e-20	5.95685e-19	S000000249	YBR045C	GIP1	Glc7-Interacting Protein
YML124C	81.1846	95.8509	189.175	174.555	1.03935	5.46344e-20	6.20932e-19	S000004593	YML124C	TUB3	TUBulin
YDL010W	74.0358	59.9444	138.212	144.95	1.07869	6.00918e-20	6.80786e-19	S000002168	YDL010W	GRX6	GlutaRedoXin
YLR278C	150.124	141.222	292.944	305.452	1.03817	7.12398e-20	8.01051e-19	S000004268	YLR278C
YDR475C	142.976	130.706	309.465	277.188	1.09992	7.12694e-20	8.01051e-19	S000002883	YDR475C	JIP4	Jumonji domain Interacting Protein
YHL050C	8.06891	9.91561	25.8871	26.6846	1.54852	7.5836e-20	8.49697e-19	S000001042	YHL050C
YOR129C	18.332	16.3007	41.1538	44.8428	1.31031	9.31388e-20	1.03542e-18	S000005655	YOR129C	AFI1	ArF3-Interacting protein
YLR263W	30.0107	26.7421	62.4682	60.8693	1.11891	9.6818e-20	1.07465e-18	S000004253	YLR263W	RED1	REDuctional division
YOR273C	117.212	113.879	251.201	219.793	1.0273	9.80264e-20	1.08637e-18	S000005799	YOR273C	TPO4	Transporter of POlyamines
YER109C	54.2882	51.9818	101.926	119.607	1.05903	9.90719e-20	1.09625e-18	S000000911	YER109C	FLO8	FLOcculation
YFR023W	10.8293	8.18789	27.7309	30.2373	1.60399	1.64147e-19	1.79404e-18	S000001919	YFR023W	PES4	Polymerase Epsilon Suppressor
YGR225W	18.1197	19.6059	44.1039	44.6849	1.23501	1.72662e-19	1.88133e-18	S000003457	YGR225W	AMA1	Activator of Meiotic APC/C
YBL066C	125.847	110.274	239.843	242.609	1.03051	2.12665e-19	2.31014e-18	S000000162	YBL066C	SEF1	Suppressor of Essential Function
YOR009W	12.7404	11.6433	30.9022	32.4478	1.37556	2.49315e-19	2.69185e-18	S000005535	YOR009W	TIR4	TIp1-Related
YOR204W	146.302	148.659	299.066	292.899	1.00499	2.56971e-19	2.77031e-18	S000005730	YOR204W	DED1	Defines Essential Domain
YLR343W	10.3339	10.3663	26.7721	30.2373	1.46	2.79765e-19	3.00242e-18	S000004335	YLR343W	GAS2	Glycophospholipid-Anchored Surface protein
YLR164W	61.7909	54.9114	122.576	111.238	1.00219	3.48423e-19	3.72243e-18	S000004154	YLR164W	SHH4	SDH4 Homolog
YKL095W	43.742	37.6342	86.8065	79.5801	1.03118	3.81318e-19	4.06777e-18	S000001578	YKL095W	YJU2
YPL092W	82.3879	68.8834	148.463	160.266	1.0284	4.4601e-19	4.72253e-18	S000006013	YPL092W	SSU1	Sensitive to SUlfite
YGL122C	212.765	213.787	453.946	420.243	1.03525	4.67941e-19	4.93276e-18	S000003090	YGL122C	NAB2	Nuclear polyAdenylated RNA-Binding
YLR030W	23.4282	23.6622	53.3967	51.2376	1.15182	5.18606e-19	5.45072e-18	S000004020	YLR030W
YMR094W	14.156	13.5964	34.1473	34.0268	1.29567	5.61193e-19	5.87234e-18	S000004700	YMR094W	CTF13	Chromosome Transmission Fidelity
YPL187W	2.4773	1.95307	9.4403	10.0265	2.12631	5.94044e-19	6.19789e-18	S000006108	YPL187W	MF(ALPHA)1	Mating Factor ALPHA
YFL067W	4.74226	4.50709	18.9544	14.8423	1.86838	6.2884e-19	6.55134e-18	S000001827	YFL067W
YNL234W	20.0307	17.5777	43.3664	48.2376	1.28246	6.56375e-19	6.82821e-18	S000005178	YNL234W
YOL047C	32.0633	34.329	67.6309	65.7641	1.00703	7.12729e-19	7.39288e-18	S000005407	YOL047C	LDS2	Lipid Droplets in Sporulation
YLR154W-E	38.0796	27.7938	74.7111	84.9486	1.27524	7.27824e-19	7.53848e-18	S000028676	YLR154W-E
YOR019W	116.787	100.959	211.374	238.977	1.04788	8.25642e-19	8.51451e-18	S000005545	YOR019W
YBR280C	196.485	181.26	398.853	373.821	1.03236	9.13067e-19	9.40248e-18	S000000484	YBR280C	SAF1	SCF Associated Factor
YML131W	208.518	215.514	429.681	422.138	1.00639	9.22673e-19	9.48769e-18	S000004600	YML131W
YDR534C	14.4391	16.526	38.2775	37.5795	1.2934	9.4396e-19	9.69259e-18	S000002942	YDR534C	FIT1	Facilitator of Iron Transport
YOL156W	5.52084	5.3334	16.2255	18.6319	1.67995	1.31271e-18	1.33634e-17	S000005516	YOL156W	HXT11	HeXose Transporter
YPL201C	235.414	207.552	460.583	458.454	1.05277	1.38617e-18	1.40911e-17	S000006122	YPL201C	YIG1	Yeast protein Interacting with Glycerol 3-phosphatase
YPR152C	30.6477	27.0426	60.5507	62.0535	1.0864	1.40329e-18	1.42246e-17	S000006356	YPR152C	URN1	U2-U5-U6 snRNP
YIL011W	10.6878	12.695	30.0172	33.1584	1.43422	1.49377e-18	1.50773e-17	S000001273	YIL011W	TIR3	TIp1-Related
YDL156W	11.6079	12.3194	32.6723	29.4478	1.37691	1.60792e-18	1.61837e-17	S000002315	YDL156W	CMR1	Changed Mutation Rate
YGL166W	34.2575	27.2679	69.401	66.9484	1.14663	2.07279e-18	2.07745e-17	S000003134	YGL166W	CUP2
YMR117C	12.9527	12.0189	30.386	32.6057	1.33306	3.36463e-18	3.29346e-17	S000004723	YMR117C	SPC24	Spindle Pole Component
YGR087C	18.2612	14.2725	47.939	40.5795	1.4425	4.41552e-18	4.28678e-17	S000003319	YGR087C	PDC6	Pyruvate DeCarboxylase
YPR007C	18.4028	15.4744	40.195	48.0797	1.3793	4.78729e-18	4.6288e-17	S000006211	YPR007C	REC8	RECombination
YNL321W	130.164	124.696	284.315	242.767	1.04836	5.0591e-18	4.88498e-17	S000005265	YNL321W	VNX1	Vacuolar Na+/H+ eXchanger
YFR012W	6.3702	5.25828	17.3318	18.2371	1.60858	6.05567e-18	5.82358e-17	S000001908	YFR012W	DCV1	Demands Cdc28 kinase activity for Viability
YDL025C	190.752	170.969	383.365	354.005	1.0274	6.09763e-18	5.85603e-17	S000002183	YDL025C	RTK1	Ribosome biogenesis and TRNA synthetase-associated Kinase
YHL027W	164.847	151.438	356.519	304.347	1.0631	6.85297e-18	6.55494e-17	S000001019	YHL027W	RIM101	Regulator of IME2
YLL038C	24.9145	19.7561	60.2557	51.5534	1.32245	7.13884e-18	6.81009e-17	S000003961	YLL038C	ENT4	Epsin N-Terminal homology
YML109W	33.8328	37.7094	68.0734	80.3696	1.05284	7.19353e-18	6.85309e-17	S000004577	YML109W	ZDS2	Zillion Different Screens
YNL018C	6.44098	4.50709	18.6593	17.6055	1.72245	8.53241e-18	8.10693e-17	S000004963	YNL018C
YJR146W	23.9944	24.3383	55.9043	50.5271	1.13912	8.79567e-18	8.32376e-17	S000003907	YJR146W
YIR015W	26.9672	23.9627	56.3468	54.3166	1.11866	9.71108e-18	9.17788e-17	S000001454	YIR015W	RPR2	RNase P Ribonucleoprotein
YOR176W	131.438	153.767	301.647	289.031	1.0506	1.1305e-17	1.0656e-16	S000005702	YOR176W	HEM15	HEMe biosynthesis
YPL272C	18.8275	25.2397	53.4705	69.9484	1.48613	1.82185e-17	1.70151e-16	S000006193	YPL272C	PBI1	PSTB2 Interacting protein 1
YPL113C	27.9581	25.9909	55.7568	56.6061	1.05764	2.16811e-17	2.01696e-16	S000006034	YPL113C
YDR446W	1.69872	0.901419	6.71146	9.15803	2.58844	2.24022e-17	2.07592e-16	S000002854	YDR446W	ECM11	ExtraCellular Mutant
YJL198W	53.4389	42.8174	97.5006	95.9225	1.00571	2.47423e-17	2.28386e-16	S000003734	YJL198W	PHO90	PHOsphate metabolism
YDL204W	1003.87	922.527	2066.25	1937.48	1.05542	2.58325e-17	2.37833e-16	S000002363	YDL204W	RTN2	ReTiculoN-like
YNR058W	15.7839	19.0049	42.3339	40.5795	1.25416	2.72445e-17	2.49543e-16	S000005341	YNR058W	BIO3	BIOtin
YHR032W	75.4514	61.1463	154.511	132.239	1.06943	3.20494e-17	2.928e-16	S000001074	YHR032W	ERC1	Ethionine Resistance Conferring
YHL021C	661.226	711.745	1382.86	1395.81	1.0171	4.24624e-17	3.85461e-16	S000001013	YHL021C	AIM17	Altered Inheritance rate of Mitochondria
YKL164C	440.605	462.653	932.008	878.697	1.00337	4.41745e-17	3.99984e-16	S000001647	YKL164C	PIR1	Protein containing Internal Repeats
YOR083W	23.145	18.8547	52.8804	47.0533	1.24937	6.91288e-17	6.16535e-16	S000005609	YOR083W	WHI5	WHIskey
YPR153W	9.34295	9.23954	23.0845	24.8688	1.36613	7.51795e-17	6.67991e-16	S000006357	YPR153W		genetic interaction profile similarity to MTC Annotated Yeast genes MTC2 and MTC4
YDL109C	34.8945	28.1693	74.0474	64.422	1.13379	8.60088e-17	7.59478e-16	S000002267	YDL109C
YBR180W	4.2468	4.20662	13.4229	13.1055	1.64787	1.49899e-16	1.29949e-15	S000000384	YBR180W	DTR1	DiTyRosine
ICR1	12.2449	9.84049	29.5009	27.8688	1.37477	1.5922e-16	1.37862e-15	S000132612	ICR1	ICR1	Interfering Crick RNA
YDR443C	45.1576	36.207	80.4638	82.6591	1.00211	1.64265e-16	1.42058e-15	S000002851	YDR443C	SSN2	Suppressor of SNf1
YER039C-A	9.55529	8.11277	25.2233	22.3424	1.42693	2.83033e-16	2.42707e-15	S000007226	YER039C-A
YGL116W	26.4009	22.0096	53.0279	52.8166	1.12708	2.95704e-16	2.5266e-15	S000003084	YGL116W	CDC20	Cell Division Cycle
YGL009C	1020.65	1007.56	2444.6	1967.08	1.12113	4.27617e-16	3.60189e-15	S000002977	YGL009C	LEU1	LEUcine biosynthesis
YOL163W	16.9872	18.4791	37.9087	40.4216	1.14304	8.42474e-16	6.95651e-15	S000005523	YOL163W
YMR266W	153.451	128.152	275.244	288.32	1.00056	8.54574e-16	7.04011e-15	S000004879	YMR266W	RSN1	Rescue of Sro7 at high Nacl
YMR042W	35.5315	32.3008	73.6048	62.843	1.00817	1.00288e-15	8.18616e-15	S000004645	YMR042W	ARG80	ARGinine requiring
YLR108C	19.1106	23.2115	45.2839	51.7113	1.19686	1.19149e-15	9.65937e-15	S000004098	YLR108C
YFL058W	2.26496	1.80284	8.40777	7.8159	1.98793	1.32245e-15	1.06604e-14	S000001836	YFL058W	THI5	THIamine metabolism
YLR047C	25.6223	25.9909	51.4054	52.5008	1.0092	1.85356e-15	1.47252e-14	S000004037	YLR047C	FRE8
YOR077W	21.4463	19.4556	43.7351	43.1059	1.08518	1.95952e-15	1.5515e-14	S000005603	YOR077W	RTS2
YER060W-A	14.4391	15.3992	37.3187	32.211	1.22127	2.2971e-15	1.80277e-14	S000002958	YER060W-A	FCY22	FluoroCYtosine resistance
YAR035W	543.448	458.372	1284.4	994.436	1.18565	3.32501e-15	2.56985e-14	S000000080	YAR035W	YAT1
YAL064C-A	5.6624	4.58221	16.0043	14.2897	1.5607	3.76657e-15	2.88299e-14	S000002140	YAL064C-A	TDA8	Topoisomerase I Damage Affected
YMR135W-A	10.617	10.7419	25.7396	24.3951	1.23076	9.34085e-15	6.91922e-14	S000004743	YMR135W-A
YNL279W	21.3048	21.7092	43.3664	44.3691	1.02806	9.72194e-15	7.18657e-14	S000005223	YNL279W	PRM1	Pheromone-Regulated Membrane protein
YMR324C	0.49546	0.901419	4.72015	4.26322	2.68131	1.33476e-14	9.78548e-14	S000004943	YMR324C
YNL017C	0.3539	0.450709	3.54011	3.63163	3.131	2.43245e-14	1.74735e-13	S000004962	YNL017C
YER106W	2.97276	2.70426	9.58781	9.15803	1.71911	3.99727e-14	2.81468e-13	S000000908	YER106W	MAM1	Monopolar microtubule Attachment during Meiosis I
YER024W	1001.68	831.859	1934.45	1776.42	1.01709	5.1196e-14	3.54541e-13	S000000826	YER024W	YAT2
YBR067C	690.105	598.768	1477.41	1204.68	1.05723	5.8627e-14	4.02094e-13	S000000271	YBR067C	TIP1	Temperature shock-Inducible Protein
YGR287C	16.7041	14.8734	33.5573	42.6322	1.26847	6.30973e-14	4.30681e-13	S000003519	YGR287C	IMA1	IsoMAltase
YDL037C	5.52084	5.85922	21.0194	14.9213	1.65992	6.46928e-14	4.40306e-13	S000002195	YDL037C	BSC1	Bypass of Stop Codon
YOR348C	568.08	455.141	1312.13	1005.25	1.17934	7.76613e-14	5.24067e-13	S000005875	YOR348C	PUT4	Proline UTilization
YBL113C	20.8801	20.2068	45.579	40.0269	1.0591	7.90461e-14	5.32907e-13	S000002153	YBL113C
YAR073W	1.69872	0.976537	5.67893	6.86852	2.21048	8.19307e-14	5.50791e-13	S000000095	YAR073W	IMD1	IMP Dehydrogenase
YIL150C	14.156	12.6199	29.2797	29.6057	1.1353	9.12655e-14	6.10665e-13	S000001412	YIL150C	MCM10	MiniChromosome Maintenance
YHR126C	0.49546	0.826301	3.68762	4.97376	2.70049	1.40958e-13	9.19003e-13	S000001168	YHR126C	ANS1
YOR313C	8.06891	6.91088	18.0693	19.1845	1.31104	1.42831e-13	9.27819e-13	S000005840	YOR313C	SPS4	SPorulation Specific trancript
YBL100W-B	2.4773	3.68079	9.80906	10.3423	1.71247	1.64924e-13	1.06357e-12	S000002149	YBL100W-B
YBR019C	20.9509	20.8078	44.1777	40.1848	1.01466	1.84201e-13	1.1836e-12	S000000223	YBR019C	GAL10	GALactose metabolism
YIL170W	8.42281	7.73718	21.6094	18.5529	1.31262	2.03055e-13	1.30006e-12	S000001432	YIL170W	HXT12	HeXose Transporter
YJL037W	15.0761	12.695	29.7222	35.8426	1.23663	2.84391e-13	1.80139e-12	S000003574	YJL037W	IRC18	Increased Recombination Centers
YDL114W	1.62794	1.95307	6.49021	7.10537	1.92112	3.88812e-13	2.43683e-12	S000002272	YDL114W
YPL200W	23.8528	21.2585	43.0714	52.4218	1.08011	4.70258e-13	2.92158e-12	S000006121	YPL200W	CSM4	Chromosome Segregation in Meiosis
YKR104W	9.69685	11.4931	23.3795	27.3951	1.26058	4.98928e-13	3.08893e-12	S000001812	YKR104W
YAL024C	20.597	20.6575	39.2363	44.2112	1.01539	5.33259e-13	3.2929e-12	S000000022	YAL024C	LTE1	Low Temperature Essential
YGR079W	24.4191	32.8267	63.3533	57.2377	1.07639	5.78594e-13	3.55436e-12	S000003311	YGR079W
YNL335W	1.27404	0.976537	5.01516	5.3685	2.19094	5.86083e-13	3.59417e-12	S000005279	YNL335W	DDI3	DNA Damage Inducible
YLR415C	0.3539	0.375591	3.46636	2.9211	3.10195	6.31764e-13	3.86766e-12	S000004407	YLR415C
YLR312C	192.521	141.898	331.074	351.242	1.02842	8.14667e-13	4.9323e-12	S000004303	YLR312C	ATG39	AuTophaGy related
YLR437C	15.2885	17.9533	36.1387	33.8689	1.07571	9.25664e-13	5.57589e-12	S000004429	YLR437C	DIF1	Damage-regulated Import Facilitator
Q0085	0.42468	0.300473	2.95009	6.71063	3.69164	9.36773e-13	5.63804e-12	S000007268	Q0085	ATP6	ATP synthase
YKR105C	11.9618	12.094	27.5096	24.9477	1.12493	1.0251e-12	6.14368e-12	S000001813	YKR105C	VBA5	Vacuolar Basic Amino acid transporter
YFL062W	9.69685	8.71372	20.2081	24.2372	1.26845	1.17036e-12	6.96739e-12	S000001832	YFL062W	COS4	COnserved Sequence
YPL189W	10.1923	7.73718	21.9044	21.6319	1.27643	1.45887e-12	8.6273e-12	S000006110	YPL189W	GUP2	Glycerol UPtake
YDL248W	21.0216	17.6528	43.6614	38.2111	1.08107	1.47949e-12	8.72752e-12	S000002407	YDL248W	COS7	COnserved Sequence
YJR128W	0.920139	1.35213	5.90019	4.65796	2.21651	1.56377e-12	9.19426e-12	S000003889	YJR128W
Q0120	0.3539	0.0751182	2.06507	3.23689	3.53956	4.93888e-12	2.81106e-11	S000007273	Q0120	BI4
YDR488C	16.067	15.6997	42.8501	31.5005	1.22731	7.09817e-12	3.97967e-11	S000002896	YDR488C	PAC11	Perish in the Absence of CIN8
YGL081W	15.7131	13.8218	29.9435	30.632	1.03459	7.86154e-12	4.39038e-11	S000003049	YGL081W
YHR079C-A	0.49546	0.225355	2.65508	3.00004	2.92313	1.02392e-11	5.64741e-11	S000001957	YHR079C-A	SAE3	Sporulation in the Absence of spo Eleven
YLR013W	0.990919	1.05166	3.98263	6.07904	2.28641	1.6765e-11	9.0028e-11	S000004003	YLR013W	GAT3
YHL045W	1.4156	1.57748	5.01516	7.26326	2.02752	2.059e-11	1.0917e-10	S000001037	YHL045W
YML058W-A	0.778579	0.300473	2.87634	4.57901	2.74637	2.23423e-11	1.17847e-10	S000007472	YML058W-A	HUG1
YKR005C	19.3937	16.0753	34.4423	41.9217	1.10396	2.46967e-11	1.29689e-10	S000001713	YKR005C
YDR403W	29.2321	24.5637	48.4553	59.4482	1.00235	3.18454e-11	1.64561e-10	S000002811	YDR403W	DIT1	DITyrosine
YMR105W-A	3.1851	2.70426	10.3253	7.89485	1.62654	3.45043e-11	1.77657e-10	S000028692	YMR105W-A
YMR198W	13.3066	14.6481	28.9847	27.3951	1.01284	3.70911e-11	1.90701e-10	S000004811	YMR198W	CIK1	Chromosome Instability and Karyogamy
YGR269W	4.38836	3.60568	10.0303	11.5265	1.42494	3.76377e-11	1.93372e-10	S000003501	YGR269W
YLR410W-B	3.04354	3.07985	9.36655	8.21065	1.52013	4.11661e-11	2.10437e-10	S000007380	YLR410W-B
YCL019W	1.7695	1.42725	5.38392	6.00009	1.82121	9.5375e-11	4.71974e-10	S000000524	YCL019W
YOL128C	19.7476	17.9533	34.3686	41.5269	1.00755	9.70093e-11	4.78731e-10	S000005488	YOL128C	YGK3	Yeast homolog of Glycogen synthase Kinase
YDL222C	371.949	271.853	699.246	596.061	1.0085	1.11324e-10	5.46348e-10	S000002381	YDL222C	FMP45	Found in Mitochondrial Proteome
YGL258W-A	3.32666	3.90615	10.1041	9.07908	1.4084	1.1377e-10	5.57967e-10	S000007607	YGL258W-A
YMR018W	16.3502	11.4931	29.8697	33.8689	1.19164	1.84361e-10	8.85283e-10	S000004620	YMR018W
YGL138C	0.7078	0.300473	3.2451	2.7632	2.54025	2.26782e-10	1.07952e-09	S000003106	YGL138C
YHR014W	3.39744	4.20662	10.1041	9.47382	1.36598	2.55779e-10	1.21189e-09	S000001056	YHR014W	SPO13	SPOrulation
YPR014C	5.52084	4.65733	12.0216	12.237	1.24907	2.84812e-10	1.34142e-09	S000006218	YPR014C
YEL074W	9.05983	7.58694	17.9956	18.0003	1.10979	3.12461e-10	1.46487e-09	S000000800	YEL074W
YHR217C	1.0617	1.35213	6.04769	3.94743	2.04995	5.83109e-10	2.64833e-09	S000001260	YHR217C
YGL175C	6.7241	7.8123	17.2581	15.0792	1.15527	6.08307e-10	2.75575e-09	S000003143	YGL175C	SAE2	Sporulation in the Absence of spo Eleven
YLR236C	1.84028	1.72772	6.1952	5.3685	1.69206	7.13177e-10	3.21652e-09	S000004226	YLR236C
YNL269W	3.25588	3.45544	8.77653	8.60539	1.3716	7.43739e-10	3.35224e-09	S000005213	YNL269W	BSC4	Bypass of Stop Codon
YGL240W	10.4047	10.2161	22.7157	19.5792	1.03663	1.08049e-09	4.8243e-09	S000003209	YGL240W	DOC1	Destruction Of Cyclin B
YOR029W	3.82212	3.23008	8.40777	10.0265	1.37966	1.11654e-09	4.97903e-09	S000005555	YOR029W
YMR032W	17.6242	11.7936	31.9348	33.9479	1.16022	1.13283e-09	5.04218e-09	S000004635	YMR032W	HOF1	Homolog Of cdc Fifteen
YBR040W	0.49546	0.450709	3.46636	2.21056	2.56619	1.17864e-09	5.22976e-09	S000000244	YBR040W	FIG1	Factor-Induced Gene
YIL175W	1.69872	1.27701	4.94141	5.2106	1.75847	1.31393e-09	5.81197e-09	S000001437	YIL175W
YLR379W	8.98905	9.23954	18.4381	18.3161	1.01132	1.6315e-09	7.14132e-09	S000004371	YLR379W
YML009C-A	7.50268	6.1597	14.308	16.1055	1.15023	1.65719e-09	7.24489e-09	S000004469	YML009C-A
YCR006C	6.51176	6.53529	16.078	13.1844	1.16588	1.99114e-09	8.6623e-09	S000000599	YCR006C
YER044C-A	4.67148	3.60568	9.4403	13.1055	1.4383	2.4927e-09	1.07629e-08	S000001954	YER044C-A	MEI4	MEIosis-specific
YDR374C	6.58254	4.73245	12.4641	16.1055	1.32995	2.75658e-09	1.18262e-08	S000002782	YDR374C	PHO92	PHOsphate metabolism
YLR445W	0.849359	0.600946	2.72884	4.65796	2.32201	3.28987e-09	1.39878e-08	S000004437	YLR445W	GMC2	Grand Meiotic recombination Cluster
Q0110	0.21234	0.0751182	1.32754	2.36846	3.57341	3.30099e-09	1.40267e-08	S000007271	Q0110	BI2
YJR157W	3.04354	2.40378	6.93272	7.89485	1.43642	3.68439e-09	1.55723e-08	S000003918	YJR157W
YAL064W	1.20326	0.676064	3.2451	5.2106	2.14458	4.71722e-09	1.97386e-08	S000000060	YAL064W
YAR075W	0.21234	0.375591	2.28632	2.05266	2.85771	5.14834e-09	2.14419e-08	S000002145	YAR075W
YOL131W	4.6007	4.65733	9.80906	13.2634	1.31334	5.81347e-09	2.40434e-08	S000005491	YOL131W
YPL033C	2.33574	1.80284	5.45767	6.86852	1.56345	5.89478e-09	2.43514e-08	S000005954	YPL033C	SRL4	Suppressor of Rad53 null Lethality or Suppressor of Rad53 and Lcd1
YAL064W-B	2.05262	1.80284	6.56396	5.05271	1.58772	7.29772e-09	2.98015e-08	S000002141	YAL064W-B
YJR027W	3.32666	2.70426	8.33402	7.34221	1.37382	7.43355e-09	3.03214e-08	S000003788	YJR027W
YFR032C	0.42468	0.676064	2.72884	2.9211	2.34796	8.20351e-09	3.33475e-08	S000001928	YFR032C	RRT5	Regulator of rDNA Transcription
YER039C	10.6878	14.2725	26.5508	24.3951	1.0314	8.47848e-09	3.4426e-08	S000000841	YER039C	HVG1	Homologous to VRG4
YKR041W	1.13248	1.20189	5.08891	3.55268	1.88546	9.09299e-09	3.68372e-08	S000001749	YKR041W
YJR159W	1.69872	2.17843	5.53143	5.76324	1.54158	1.3094e-08	5.21856e-08	S000003920	YJR159W	SOR1
YIL100C-A	0.778579	0.375591	3.0976	2.4474	2.23668	1.94186e-08	7.6367e-08	S000028794	YIL100C-A
YOR192C-B	2.33574	2.32867	6.63771	5.84219	1.41788	2.26707e-08	8.85214e-08	S000007354	YOR192C-B
YIL171W	2.1234	2.70426	6.04769	6.78957	1.40978	2.3867e-08	9.27857e-08	S000001433	YIL171W
YML037C	4.81304	4.20662	9.58781	10.6581	1.16184	2.70977e-08	1.04547e-07	S000004501	YML037C
RPR1	19.6768	5.10804	58.5594	61.1851	2.2696	2.93825e-08	1.13056e-07	S000006490	RPR1	RPR1	RNase P Ribonucleoprotein
YDL247W-A	3.32666	1.87796	7.52274	6.86852	1.45721	3.01989e-08	1.16135e-07	S000007602	YDL247W-A
YIR013C	0.28312	0.600946	2.36008	2.4474	2.43197	3.34276e-08	1.27724e-07	S000001452	YIR013C	GAT4
YCR102W-A	0.28312	0.450709	1.84381	2.6053	2.57293	4.9405e-08	1.8598e-07	S000007231	YCR102W-A
YOL162W	8.56437	8.11277	15.193	19.8161	1.06677	5.24147e-08	1.9679e-07	S000005522	YOL162W
YNL019C	1.7695	1.27701	5.67893	4.10532	1.676	5.36907e-08	2.01051e-07	S000004964	YNL019C
YLR461W	0.07078	0.0751182	1.03253	1.57897	3.99172	6.1469e-08	2.28855e-07	S000004453	YLR461W	PAU4	seriPAUperin family
YHL046W-A	4.17602	3.3052	8.85028	8.36854	1.19798	7.98184e-08	2.93491e-07	S000028775	YHL046W-A
YNL210W	2.26496	2.55402	5.97394	6.31588	1.34845	8.6054e-08	3.1593e-07	S000005154	YNL210W	MER1	MEiotic Recombination
YDR544C	1.20326	1.42725	4.35139	3.94743	1.65505	8.78775e-08	3.22293e-07	S000002952	YDR544C
Q0255	0.7078	0.0751182	1.99131	5.05271	3.11168	9.60904e-08	3.50609e-07	S000007282	Q0255
YOR235W	0.56624	0.751182	2.28632	3.31584	2.0723	9.84094e-08	3.5852e-07	S000005761	YOR235W	IRC13	Increased Recombination Centers
YPL278C	1.62794	1.80284	5.01516	4.73691	1.50466	1.26465e-07	4.54915e-07	S000006199	YPL278C
YOR314W	0.49546	0.751182	2.95009	2.28951	2.0671	1.47165e-07	5.24874e-07	S000005841	YOR314W
YLR416C	0.7078	0.525828	2.65508	2.52635	2.04922	1.53144e-07	5.45651e-07	S000004408	YLR416C
YDR210W-B	0.920139	0.901419	3.39261	3.00004	1.80233	2.1603e-07	7.58715e-07	S000007393	YDR210W-B
YKL177W	0	0	0.958781	0.868434	6.63229	2.81161e-07	9.70244e-07	S000001660	YKL177W
YFL063W	0.49546	0.525828	1.77006	4.10532	2.49613	3.45873e-07	1.18609e-06	S000001831	YFL063W
YJL113W	3.8929	3.98127	8.26026	8.60539	1.09689	3.69889e-07	1.26479e-06	S000003649	YJL113W
YNL057W	3.32666	3.15497	7.81775	6.86852	1.17855	4.78491e-07	1.61752e-06	S000005002	YNL057W
YNR072W	1.84028	1.20189	4.27764	4.50007	1.51523	5.41248e-07	1.81588e-06	S000005355	YNR072W	HXT17	HeXose Transporter
YNL128W	7.64424	7.43671	13.0542	17.2897	1.00553	7.00129e-07	2.31406e-06	S000005072	YNL128W	TEP1	TEnsin-like Phosphatase
YGL259W	3.25588	3.15497	6.93272	7.34221	1.15136	7.0771e-07	2.33695e-06	S000003228	YGL259W	YPS5	YaPSin
YIL141W	3.60978	2.70426	7.37524	6.78957	1.16017	9.41546e-07	3.07773e-06	S000001403	YIL141W
YNL337W	0.07078	0	1.03253	0.947382	4.4508	1.07239e-06	3.47674e-06	S000005281	YNL337W
YHR125W	0	0.300473	1.03253	1.65792	3.11647	1.13926e-06	3.68347e-06	S000001167	YHR125W
YBL108W	0.49546	0	1.62255	1.57897	2.60885	1.59977e-06	5.0599e-06	S000000204	YBL108W
YLR162W	0.778579	0.676064	2.28632	3.00004	1.84126	1.61489e-06	5.10092e-06	S000004152	YLR162W
YGR139W	1.13248	1.57748	3.17135	5.60535	1.68788	2.07981e-06	6.47759e-06	S000003371	YGR139W
YOL037C	2.54808	2.4789	5.01516	7.26326	1.28081	2.47116e-06	7.62316e-06	S000005397	YOL037C
YJL077W-B	1.0617	0.676064	3.17135	2.6053	1.71736	2.5981e-06	7.9798e-06	S000028662	YJL077W-B
YML034C-A	8.77671	4.88269	16.2993	14.3686	1.1623	3.04239e-06	9.27687e-06	S000004499	YML034C-A
YFL061W	1.27404	0.826301	2.65508	4.18427	1.68167	3.21737e-06	9.7895e-06	S000001833	YFL061W	DDI2	DNA Damage Inducible
snR19	65.4007	26.3665	103.253	132.712	1.36153	3.35874e-06	1.01979e-05	S000007295	snR19	SNR19	Small Nuclear RNA
YHL046C	0.3539	0.450709	1.6963	2.05266	2.19547	3.85842e-06	1.16209e-05	S000001038	YHL046C	PAU13	seriPAUperin
RUF22	0.07078	0.0751182	1.10629	0.947382	3.65908	4.12302e-06	1.2376e-05	S000130131	RUF22	RUF22	RNA of Unknown Function
YAR009C	3.539	3.23008	7.15398	6.86852	1.04784	4.23593e-06	1.26989e-05	S000000067	YAR009C
YLL046C	2.05262	1.6526	3.90887	5.68429	1.36028	4.5618e-06	1.36471e-05	S000003969	YLL046C	RNP1	RiboNucleoProtein
YPL121C	0.56624	0.600946	1.84381	2.52635	1.88363	5.49861e-06	1.63127e-05	S000006042	YPL121C	MEI5	MEIosis
YAL065C	1.4156	1.27701	4.13013	3.23689	1.4476	5.7246e-06	1.69549e-05	S000001817	YAL065C
YAL068C	0.28312	0.0751182	1.03253	1.57897	2.77235	6.11759e-06	1.80513e-05	S000002142	YAL068C	PAU8	seriPAUperin
YLR255C	3.04354	1.6526	5.60518	5.68429	1.25352	6.52745e-06	1.91813e-05	S000004245	YLR255C
YFR054C	0.849359	1.50236	3.02385	3.71058	1.51696	7.34311e-06	2.14279e-05	S000001950	YFR054C
YAR068W	0.56624	0.150236	2.13882	1.34213	2.23697	8.29537e-06	2.40198e-05	S000000091	YAR068W
YJR037W	1.0617	0.751182	2.72884	2.84215	1.60276	8.58256e-06	2.4791e-05	S000003798	YJR037W
LSR1	221.258	80.677	392.436	403.348	1.39787	9.46696e-06	2.71694e-05	S000006478	LSR1	LSR1	Large Spliceosomal RNA
YLR235C	0.7078	0.901419	3.17135	2.05266	1.69823	9.96041e-06	2.84594e-05	S000004225	YLR235C
YDR042C	3.1851	2.70426	5.67893	6.86852	1.08398	1.22108e-05	3.45156e-05	S000002449	YDR042C
YHR213W-A	2.33574	3.00473	5.60518	5.84219	1.10059	1.37923e-05	3.86794e-05	S000028651	YHR213W-A
YIL102C	0.778579	0.901419	1.99131	3.31584	1.64376	1.80279e-05	4.98708e-05	S000001364	YIL102C
YOR214C	4.31758	2.55402	6.63771	8.84224	1.1616	1.97318e-05	5.4289e-05	S000005740	YOR214C	SPR2	SPorulation-Regulated
YNL033W	0.56624	0.751182	1.6963	2.68425	1.71693	3.13444e-05	8.41599e-05	S000004978	YNL033W
YOL161C	0.14156	0.0751182	0.958781	1.02633	3.07684	3.32942e-05	8.89592e-05	S000005521	YOL161C	PAU20	seriPAUperin
YHR213W-B	1.7695	1.27701	3.76137	3.55268	1.25382	5.38805e-05	0.000140385	S000028652	YHR213W-B
YER188C-A	1.98184	1.42725	4.6464	3.39479	1.23261	7.26474e-05	0.00018575	S000028764	YER188C-A
YML133C	0.21234	0.225355	0.885028	1.50002	2.38818	7.6576e-05	0.000195025	S000004602	YML133C
YDR525W	0.56624	0.300473	1.32754	1.97371	1.88788	0.000102886	0.000257342	S000002933	YDR525W	API2	APIcal
YCL026C-A	1.13248	1.50236	3.17135	3.15794	1.26334	0.000104669	0.000261433	S000000589	YCL026C-A	FRM2	Fatty acid Repression Mutant
YLR111W	1.91106	1.12677	3.0976	4.34217	1.27472	0.00012093	0.000299738	S000004101	YLR111W
YML047C	0.28312	0.375591	1.18004	1.57897	2.03575	0.000127362	0.000314915	S000004510	YML047C	PRM6	Pheromone-Regulated Membrane protein
YEL030C-A	0.920139	0.450709	1.62255	2.6053	1.59197	0.000137515	0.000338024	S000028619	YEL030C-A
YDR261W-B	3.11432	1.57748	4.7939	5.44745	1.11307	0.000162345	0.000395375	S000007397	YDR261W-B
Q0160	2.97276	0.751182	4.6464	10.1054	1.97184	0.000172896	0.000418924	S000007279	Q0160	SCEI
YIL100W	0.28312	0.375591	1.40129	1.26318	1.99353	0.000182803	0.000440979	S000001362	YIL100W
YOR024W	1.4156	0.826301	2.80259	2.84215	1.31564	0.000186436	0.000449134	S000005550	YOR024W
YDL247W	0.778579	0.375591	1.40129	2.28951	1.64026	0.000187576	0.000451576	S000002406	YDL247W	MPH2	Maltose Permease Homolog
YHR185C	2.54808	0.901419	4.05638	4.50007	1.293	0.00020732	0.00049726	S000001228	YHR185C	PFS1	Prospore Formation at Spindles
YHR093W	1.4156	0.826301	2.36008	3.31584	1.31912	0.000220893	0.000527154	S000001135	YHR093W	AHT1
Q0115	0	0	0.516266	0.473691	5.76017	0.000321383	0.0007455	S000007272	Q0115	BI3
YIL054W	1.7695	1.50236	3.54011	3.47374	1.09328	0.000368669	0.000846643	S000001316	YIL054W
YER190W	0.49546	0.751182	1.84381	1.81582	1.54766	0.000405901	0.000927662	S000000992	YER190W	YRF1-2
YCR108C	0.14156	0.300473	1.18004	0.947382	2.23855	0.000415389	0.000946917	S000028536	YCR108C
Q0275	20.7385	4.9578	26.7721	62.7641	1.79863	0.000451521	0.00102339	S000007283	Q0275	COX3	Cytochrome c OXidase
YDR250C	0.990919	0.676064	1.99131	2.28951	1.34142	0.000503057	0.00113407	S000002658	YDR250C
YER085C	0.07078	0.0751182	0.590019	0.789485	3.08197	0.000602912	0.00134345	S000000887	YER085C
YAR064W	0.63702	0.450709	1.62255	1.50002	1.50044	0.00067885	0.00149798	S000000089	YAR064W
YOR032W-A	1.4156	1.35213	2.87634	3.00004	1.07962	0.000927532	0.00201328	S000028710	YOR032W-A
YIL012W	2.4773	2.17843	3.46636	6.15799	1.03776	0.000965849	0.00208755	S000001274	YIL012W
YLR385C	0.990919	0.976537	2.36008	2.13161	1.18487	0.00127887	0.00271308	S000004377	YLR385C	SWC7	SWr Complex
YGR294W	0.3539	0.300473	1.18004	1.10528	1.77354	0.00137416	0.00290314	S000003526	YGR294W	PAU12	seriPAUperin
YOR011W-A	1.98184	0.901419	3.0976	3.00004	1.06442	0.00183067	0.00379778	S000028581	YOR011W-A
21S_rRNA	431.404	114.48	472.458	1004.86	1.43619	0.00183432	0.00380424	S000007288	Q0158	21S_RRNA
YBL071C-B	0.14156	0.150236	0.958781	0.55264	2.31371	0.00234233	0.00477991	S000028597	YBL071C-B
YCR104W	0.990919	0.826301	1.47505	2.7632	1.20073	0.00296388	0.00594611	S000000701	YCR104W	PAU3	seriPAUperin family
15S_rRNA	104.188	26.4416	102.663	253.188	1.44532	0.00301458	0.00603933	S000007287	Q0020	15S_RRNA
YJR029W	0.778579	0.826301	1.6963	1.97371	1.18226	0.00310624	0.00620204	S000003790	YJR029W
YLR466C-B	0.28312	0.375591	1.40129	0.789485	1.72214	0.00330327	0.00655502	S000028686	YLR466C-B
YHR214W	1.27404	0.826301	2.13882	2.36846	1.08552	0.00333433	0.00661297	S000001257	YHR214W
YDR543C	0.21234	0.300473	0.958781	0.947382	1.86377	0.00336351	0.00666899	S000002951	YDR543C
YIR044C	0.3539	0.676064	1.25379	1.50002	1.41125	0.0038644	0.0075987	S000001483	YIR044C
snR6	0	0	0.295009	0.394743	5.24208	0.0044771	0.00871639	S000006494	snR6	SNR6	Small Nuclear RNA
YJL028W	0.920139	0.826301	1.62255	2.21056	1.11825	0.00453776	0.00882054	S000003565	YJL028W
YHL048C-A	0.56624	0.826301	1.32754	2.05266	1.26725	0.00462426	0.00898623	S000028829	YHL048C-A
YBL109W	0.849359	0.976537	1.99131	1.89476	1.08545	0.00479952	0.00930396	S000002150	YBL109W
YAL069W	0.3539	0.0751182	0.811276	0.868434	1.89689	0.00556795	0.010686	S000002143	YAL069W
YOR394C-A	0.990919	0.751182	1.6963	2.05266	1.08893	0.00570734	0.0109476	S000028718	YOR394C-A
Q0050	112.257	31.9253	108.932	218.687	1.18365	0.00573046	0.010989	S000007261	Q0050	AI1
YDL162C	0.42468	0.300473	1.03253	1.10528	1.52762	0.00576996	0.0110618	S000002321	YDL162C
YDR360W	2.4773	0.976537	4.35139	2.84215	1.04839	0.0058511	0.0111933	S000002768	YDR360W	OPI7	OverProducer of Inositol
YOL166C	0.3539	0.300473	0.811276	1.18423	1.57062	0.00658557	0.012491	S000005526	YOL166C
YLR458W	1.55716	1.35213	1.84381	4.57901	1.12875	0.00697398	0.0131716	S000004450	YLR458W
YGL235W	0.778579	0.150236	1.03253	1.34213	1.30655	0.00758475	0.0142572	S000003204	YGL235W
SCR1	268.468	60.5453	312.046	436.822	1.18637	0.00853538	0.0158559	S000006491	SCR1	SCR1	Small Cytoplasmic RNA
YOL019W-A	0	0	0.221257	0.394743	5.07729	0.00871177	0.0161541	S000028707	YOL019W-A
Q0250	26.684	5.48363	26.5508	52.0271	1.28674	0.0132212	0.0238397	S000007281	Q0250	COX2	Cytochrome c OXidase
Q0070	0	0.0751182	0.516266	0.236846	3.09196	0.013518	0.0243378	S000007265	Q0070	AI5_ALPHA
YFR057W	0.14156	0	0.295009	0.631588	2.50809	0.0154465	0.0274768	S000001953	YFR057W
YOR008W-B	0.07078	0.525828	0.958781	0.789485	1.55614	0.0156331	0.0277699	S000007628	YOR008W-B
YLL047W	0.3539	0.375591	0.885028	1.02633	1.36534	0.0167465	0.0295899	S000003970	YLL047W
YLL066C	0.56624	0.150236	1.10629	0.789485	1.36534	0.0247907	0.0423946	S000003989	YLL066C

## Sheet: Downregulated genes
Gene	ScK1.count	ScK2.count	ScM1.count	ScM2.count	logFC	P-value	FDR	ID	Syst.name	Symbol	Description
YER124C	1812.46	1892.75	103.991	90.0803	-4.25443	5.12036e-194	1.82439e-190	S000000926	YER124C	DSE1	Daughter Specific Expression
YHR143W	2107.33	2296.44	141.752	125.765	-4.04073	3.77783e-177	3.84583e-174	S000001186	YHR143W	DSE2	Daughter Specific Expression
YGL028C	907.682	941.833	111.292	103.659	-3.10477	2.19883e-130	1.1192e-127	S000002996	YGL028C	SCW11	Soluble Cell Wall protein
YDL227C	252.331	362.821	21.2407	23.2109	-3.79044	5.98341e-105	2.03037e-102	S000002386	YDL227C	HO	HOmothallic switching endonuclease
YNL277W-A	61.1539	66.0289	5.67893	6.00009	-3.44348	1.85591e-103	5.51052e-101	S000028852	YNL277W-A
YNL066W	622.368	650.374	113.431	105.396	-2.53978	6.72517e-95	1.45223e-92	S000005010	YNL066W	SUN4
YKL216W	353.121	368.68	63.5008	71.1326	-2.42281	9.90894e-87	1.85819e-84	S000001699	YKL216W	URA1	URAcil requiring
YLR286C	3453.42	3631.67	539.572	439.27	-2.85552	4.6952e-86	8.3645e-84	S000004276	YLR286C	CTS1	ChiTinaSe
YKL096W	928.775	1132.86	158.936	146.528	-2.75449	8.19946e-84	1.39117e-81	S000001579	YKL096W	CWP1	Cell Wall Protein
YDL055C	3669.3	4372.56	637.663	607.43	-2.69123	1.69798e-81	2.68885e-79	S000002213	YDL055C	PSA1
YOR264W	184.24	211.458	46.0215	45.0796	-2.1183	5.12736e-79	7.77395e-77	S000005790	YOR264W	DSE3	Daughter Specific Expression
YBR158W	645.301	702.581	149.865	149.055	-2.17275	4.94223e-71	5.9692e-69	S000000362	YBR158W	AMN1	Antagonist of Mitotic exit Network
YGL147C	455.469	631.369	88.2816	86.0539	-2.63993	1.94917e-62	1.9563e-60	S000003115	YGL147C	RPL9A	Ribosomal Protein of the Large subunit
YOL101C	159.043	135.664	38.2775	38.6848	-1.93716	3.10629e-62	3.07436e-60	S000005461	YOL101C	IZH4	Implicated in Zinc Homeostasis
YNL301C	134.057	163.532	35.4011	37.1058	-2.03683	9.42093e-60	8.95114e-58	S000005245	YNL301C	RPL18B	Ribosomal Protein of the Large subunit
YLR198C	23.2866	26.8172	1.32754	2.28951	-3.79488	1.7174e-58	1.569e-56	S000004188	YLR198C
YFR052C-A	182.471	200.791	60.3294	57.0008	-1.70713	5.12243e-57	4.50648e-55	S000028768	YFR052C-A
YNR067C	811.563	812.629	218.528	194.924	-1.97374	1.75779e-56	1.49119e-54	S000005350	YNR067C	DSE4	Daughter Specific Expression
YFR032C-A	189.124	198.688	63.427	57.5535	-1.67983	2.61236e-56	2.16461e-54	S000006437	YFR032C-A	RPL29	Ribosomal Protein of the Large subunit
YDL003W	125.847	148.734	37.9825	34.1058	-1.92812	1.14566e-55	9.27723e-54	S000002161	YDL003W	MCD1	Mitotic Chromosome Determinant
YGR020C	235.768	277.562	74.1211	72.5537	-1.80689	7.83966e-53	5.81931e-51	S000003252	YGR020C	VMA7	Vacuolar Membrane Atpase
YHR183W	377.257	525.903	85.3315	86.7644	-2.39157	9.07007e-53	6.66323e-51	S000001226	YHR183W	GND1	6-phosphoGlucoNateDehydrogenase
YJL189W	64.1974	64.3763	16.078	15.4739	-2.02571	3.39241e-52	2.41743e-50	S000003725	YJL189W	RPL39	Ribosomal Protein of the Large subunit
YLL009C	203.28	172.922	51.9217	60.0009	-1.74971	1.34167e-47	8.31369e-46	S000003932	YLL009C	COX17	Cytochrome c OXidase
YOR342C	140.357	151.514	51.7004	47.606	-1.55452	3.30965e-47	2.03315e-45	S000005869	YOR342C
YOR167C	423.689	510.428	129.878	127.818	-1.85775	1.06412e-46	6.42622e-45	S000005693	YOR167C	RPS28A	Ribosomal Protein of the Small subunit
YBL043W	233.857	227.383	79.0625	81.0012	-1.5269	1.08195e-46	6.47898e-45	S000000139	YBL043W	ECM13	ExtraCellular Mutant
YEL020C-B	131.721	115.983	32.746	39.4743	-1.77929	5.42206e-46	3.11593e-44	S000028544	YEL020C-B
YDL184C	326.154	250.519	71.3185	76.1064	-1.96798	3.7564e-45	2.10772e-43	S000002343	YDL184C	RPL41A	Ribosomal Protein of the Large subunit
YPL143W	116.787	157.373	32.0823	33.711	-2.05858	4.42932e-45	2.46589e-43	S000006064	YPL143W	RPL33A	Ribosomal Protein of the Large subunit
YEL020W-A	156.07	134.762	47.4228	49.027	-1.59263	6.49046e-45	3.58535e-43	S000007256	YEL020W-A	TIM9	Translocase of the Inner Mitochondrial membrane
YGR283C	136.676	163.007	46.6852	48.7902	-1.64998	7.13937e-45	3.91347e-43	S000003515	YGR283C
YLR110C	5075.42	5954.62	1508.83	1473.65	-1.88684	9.14323e-45	4.93596e-43	S000004100	YLR110C	CCW12	Covalently linked Cell Wall protein
YDR447C	612.954	686.956	192.715	199.819	-1.72749	1.12308e-44	6.01732e-43	S000002855	YDR447C	RPS17B	Ribosomal Protein of the Small subunit
YJL190C	887.935	1304.5	201.786	215.608	-2.393	8.01662e-44	4.08046e-42	S000003726	YJL190C	RPS22A	Ribosomal Protein of the Small subunit
YLR367W	334.435	408.493	108.121	106.502	-1.79119	8.31481e-44	4.20222e-42	S000004359	YLR367W	RPS22B	Ribosomal Protein of the Small subunit
YBR230W-A	152.318	151.964	49.1928	57.0008	-1.51939	1.37217e-43	6.88598e-42	S000029722	YBR230W-A
YEL040W	254.949	300.773	88.0603	88.896	-1.65075	3.63105e-42	1.69117e-40	S000000766	YEL040W	UTR2	Unidentified TRanscript
YNL300W	111.125	153.917	32.3035	30.5531	-2.07508	4.50353e-42	2.0839e-40	S000005244	YNL300W	TOS6
YBL003C	219.206	260.51	79.2838	74.6853	-1.63904	5.10918e-42	2.3489e-40	S000000099	YBL003C	HTA2	Histone h Two A
YNL327W	1041.46	1038.28	341.99	305.136	-1.68417	7.01817e-42	3.18544e-40	S000005271	YNL327W	EGT2
YOL143C	371.099	388.962	133.639	125.923	-1.5498	1.71472e-41	7.63692e-40	S000005503	YOL143C	RIB4	RIBoflavin biosynthesis
YHR092C	134.977	142.725	47.1278	53.2903	-1.46797	3.57355e-41	1.57192e-39	S000001134	YHR092C	HXT4	HeXose Transporter
YPL249C-A	90.7399	119.663	29.3534	27.0793	-1.8972	9.22195e-41	4.00705e-39	S000006438	YPL249C-A	RPL36B	Ribosomal Protein of the Large subunit
YHR141C	510.819	603.124	167.934	173.766	-1.70481	1.23931e-40	5.35232e-39	S000001183	YHR141C	RPL42B	Ribosomal Protein of the Large subunit
YOR369C	1111.39	1354.01	350.471	354.953	-1.80521	1.28918e-40	5.50104e-39	S000005896	YOR369C	RPS12	Ribosomal Protein of the Small subunit
YCL012C	221.258	229.411	76.5549	85.6592	-1.47444	2.76996e-40	1.15431e-38	S000029705	YCL012C
YJL188C	77.2209	81.6535	27.9521	23.2109	-1.63258	5.43563e-39	2.20081e-37	S000003724	YJL188C	BUD19	BUD site selection
YDL133C-A	167.465	145.729	38.13	51.3955	-1.80792	1.2875e-38	5.18346e-37	S000002293	YDL133C-A	RPL41B	Ribosomal Protein of the Large subunit
YER074W-A	171.571	153.992	57.6006	62.922	-1.43413	1.48036e-38	5.92642e-37	S000007651	YER074W-A	YOS1	Yip One Suppressor
YKL056C	1408.24	1431.23	472.236	486.797	-1.56596	1.79023e-38	7.08732e-37	S000001539	YKL056C	TMA19	Translation Machinery Associated
YHR005C-A	337.054	359.516	114.464	127.423	-1.52607	2.31033e-38	9.04582e-37	S000003530	YHR005C-A	TIM10	Translocase of the Inner Membrane
YER152C	219.984	224.303	88.3553	83.1328	-1.37303	9.21175e-38	3.56755e-36	S000000954	YER152C
YDL081C	412.647	520.119	133.123	142.186	-1.7604	9.78505e-38	3.7691e-36	S000002239	YDL081C	RPP1A	Ribosomal Protein P1 Alpha
YPR073C	115.867	107.119	39.9	43.9743	-1.41133	1.04997e-37	4.02264e-36	S000006277	YPR073C	LTP1
YER009W	267.973	307.759	93.518	101.765	-1.55986	1.90888e-37	7.1972e-36	S000000811	YER009W	NTF2	Nuclear Transport Factor
YLR185W	232.654	313.168	74.4161	80.6854	-1.81511	1.28102e-36	4.65744e-35	S000004175	YLR185W	RPL37A	Ribosomal Protein of the Large subunit
YLR179C	143.4	186.519	50.1516	53.5271	-1.66976	4.87609e-36	1.68675e-34	S000004169	YLR179C
YNL162W	296.922	394.596	100.082	97.7383	-1.8053	5.32604e-36	1.8335e-34	S000005106	YNL162W	RPL42A	Ribosomal Protein of the Large subunit
YHR021C	356.66	502.015	107.9	113.212	-1.9572	5.89333e-36	2.01903e-34	S000001063	YHR021C	RPS27B	Ribosomal Protein of the Small subunit
YDR308C	74.3897	74.4422	28.0259	27.0793	-1.43279	7.48186e-36	2.53884e-34	S000002716	YDR308C	SRB7	Suppressor of RNA polymerase B
YDR086C	155.857	176.903	60.1082	66.0799	-1.39901	1.26332e-35	4.22649e-34	S000002493	YDR086C	SSS1	Sec Sixty-one Suppressor
YPR113W	197.972	211.308	81.4963	82.6591	-1.31788	1.35523e-35	4.51279e-34	S000006317	YPR113W	PIS1	Phosphatidyl Inositol Synthase
TLC1	278.944	268.623	107.088	98.8436	-1.41059	1.52748e-35	5.06272e-34	S000006657	TLC1	TLC1	TeLomerase Component
YGR206W	103.056	93.2969	35.0324	39.3953	-1.40046	2.55189e-35	8.41887e-34	S000003438	YGR206W	MVB12	MultiVesicular Body sorting factor of 12 kilodaltons
YMR195W	86.0684	76.9962	31.1235	28.0267	-1.46218	3.89663e-35	1.26792e-33	S000004808	YMR195W	ICY1	Interacting with the CYtoskeleton
YLR061W	63.2773	87.8883	18.9544	16.9739	-2.07099	4.32078e-35	1.39954e-33	S000004051	YLR061W	RPL22A	Ribosomal Protein of the Large subunit
YKL080W	256.436	313.243	93.7392	97.5804	-1.57402	9.06936e-35	2.89813e-33	S000001563	YKL080W	VMA5	Vacuolar Membrane Atpase
YLR448W	264.859	352.83	89.6091	91.4224	-1.77042	1.00483e-34	3.19663e-33	S000004440	YLR448W	RPL6B	Ribosomal Protein of the Large subunit
YLR390W	98.2426	90.8931	39.0887	35.9216	-1.33364	2.67726e-34	8.36762e-33	S000004382	YLR390W	ECM19	ExtraCellular Mutant
YKL033W-A	115.796	130.48	48.8241	47.2902	-1.35682	4.63086e-34	1.42239e-32	S000007242	YKL033W-A
YMR074C	336.134	315.797	123.535	124.581	-1.39371	4.75392e-34	1.45392e-32	S000004678	YMR074C	SDD2	Suppressor of Degenerative Death
YOR182C	156.141	187.495	63.2058	65.0536	-1.42154	6.44167e-34	1.96168e-32	S000005708	YOR182C	RPS30B	Ribosomal Protein of the Small subunit
YLL050C	536.441	575.706	200.975	210.161	-1.43565	7.56379e-34	2.28388e-32	S000003973	YLL050C	COF1	COFilin
YLR340W	301.593	410.596	101.262	102.712	-1.80367	8.78031e-34	2.64002e-32	S000004332	YLR340W	RPP0	Ribosomal Protein P0
YDL235C	101.428	110.048	44.1777	43.6585	-1.26709	1.5744e-33	4.71394e-32	S000002394	YDL235C	YPD1	tYrosine Phosphatase Dependent
YPL220W	174.473	214.688	66.3771	73.1063	-1.48025	1.7973e-33	5.33647e-32	S000006141	YPL220W	RPL1A	Ribosomal Protein of the Large subunit
YIL052C	349.795	473.32	117.635	122.765	-1.77553	2.21174e-33	6.53977e-32	S000001314	YIL052C	RPL34B	Ribosomal Protein of the Large subunit
YDL219W	44.1667	49.578	11.5054	13.8949	-1.8847	3.71755e-33	1.0682e-31	S000002378	YDL219W	DTD1	D-Tyr-tRNA(Tyr) Deacylase
YMR158W	156.707	157.072	65.0496	68.7642	-1.22969	4.05312e-33	1.15994e-31	S000004767	YMR158W	MRPS8	Mitochondrial Ribosomal Protein
YER070W	310.441	430.878	108.195	97.2646	-1.85084	4.40509e-33	1.25563e-31	S000000872	YER070W	RNR1	RiboNucleotide Reductase
YGR208W	54.4298	71.137	16.2993	16.1844	-1.94937	5.67983e-33	1.60613e-31	S000003440	YGR208W	SER2	SERine requiring
YDR533C	695.696	721.586	233.869	268.267	-1.49707	5.70247e-33	1.60616e-31	S000002941	YDR533C	HSP31	Heat-Shock Protein
YDL130W	335.497	461.076	117.93	111.475	-1.79561	7.96127e-33	2.21609e-31	S000002288	YDL130W	RPP1B	Ribosomal Protein P1 Beta
YLR420W	119.335	130.856	50.3729	52.3429	-1.28423	1.14323e-32	3.14543e-31	S000004412	YLR420W	URA4	URAcil requiring
YKL006W	286.517	390.69	101.041	93.9488	-1.79583	1.56834e-32	4.24943e-31	S000001489	YKL006W	RPL14A	Ribosomal Protein of the Large subunit
YGR209C	738.801	703.407	253.044	279.004	-1.43873	5.25972e-32	1.38818e-30	S000003441	YGR209C	TRX2	ThioRedoXin
YOL002C	126.767	127.325	51.4791	56.0535	-1.24094	5.86525e-32	1.53661e-30	S000005362	YOL002C	IZH2	Implicated in Zinc Homeostasis
YGR148C	516.127	654.505	183.57	197.687	-1.61841	2.98961e-31	7.63582e-30	S000003380	YGR148C	RPL24B	Ribosomal Protein of the Large subunit
YEL033W	210.358	239.477	92.7067	85.6592	-1.33406	3.90986e-31	9.9506e-30	S000000759	YEL033W	MTC7	Maintenance of Telomere Capping
YBL087C	294.728	388.737	111.44	104.37	-1.66277	4.0751e-31	1.02976e-29	S000000183	YBL087C	RPL23A	Ribosomal Protein of the Large subunit
YOR234C	296.356	405.338	101.188	108.317	-1.74374	5.12386e-31	1.2902e-29	S000005760	YOR234C	RPL33B	Ribosomal Protein of the Large subunit
YLR167W	1884.3	2231.01	711.415	713.221	-1.53038	5.66418e-31	1.41624e-29	S000004157	YLR167W	RPS31	Ribosomal Protein of the Small subunit
YGL103W	328.773	415.103	130.615	120.318	-1.56743	6.16499e-31	1.53607e-29	S000003071	YGL103W	RPL28	Ribosomal Protein of the Large subunit
YMR292W	77.7164	74.7427	27.3621	31.5005	-1.37404	6.91119e-31	1.716e-29	S000004906	YMR292W	GOT1	GOlgi Transport
YDR378C	164.917	164.509	68.8109	74.7643	-1.19845	7.2729e-31	1.79331e-29	S000002786	YDR378C	LSM6	Like SM
YLR043C	268.61	289.431	109.153	114.16	-1.32128	7.32063e-31	1.79886e-29	S000004033	YLR043C	TRX1	ThioRedoXin
YNL122C	172.774	160.227	56.8631	70.4221	-1.38831	9.80154e-31	2.39198e-29	S000005066	YNL122C
YOR263C	24.2775	27.1177	6.49021	5.60535	-2.08275	1.31219e-30	3.1805e-29	S000005789	YOR263C
YDR115W	156.636	182.012	66.1559	70.9747	-1.30418	1.58359e-30	3.81239e-29	S000002522	YDR115W	MRX14	Mitochondrial oRganization of gene eXpression (MIOREX)
YOR096W	732.997	922.828	277.899	276.004	-1.57976	3.24121e-30	7.72469e-29	S000005622	YOR096W	RPS7A	Ribosomal Protein of the Small subunit
YER117W	744.11	900.518	290.953	287.136	-1.50831	4.74129e-30	1.11876e-28	S000000919	YER117W	RPL23B	Ribosomal Protein of the Large subunit
YPR187W	213.543	232.791	96.6156	90.7908	-1.25156	6.97137e-30	1.62346e-28	S000006391	YPR187W	RPO26	RNA POlymerase
YGR034W	442.445	625.96	155.396	154.818	-1.78397	7.96705e-30	1.84929e-28	S000003266	YGR034W	RPL26B	Ribosomal Protein of the Large subunit
YMR230W	489.443	554.448	178.849	204.635	-1.44481	1.55319e-29	3.58189e-28	S000004843	YMR230W	RPS10B	Ribosomal Protein of the Small subunit
YNL096C	232.866	319.027	84.2989	89.9224	-1.66331	1.89722e-29	4.36115e-28	S000005040	YNL096C	RPS7B	Ribosomal Protein of the Small subunit
YCR031C	735.545	948.969	283.652	259.03	-1.63401	1.95782e-29	4.48599e-28	S000000627	YCR031C	RPS14A	Ribosomal Protein of the Small subunit
YPR098C	251.977	248.491	104.507	109.502	-1.22569	2.28499e-29	5.18563e-28	S000006302	YPR098C
YJL136C	377.965	498.935	144.407	144.16	-1.60333	2.75039e-29	6.22199e-28	S000003672	YJL136C	RPS21B	Ribosomal Protein of the Small subunit
YGR085C	128.607	165.035	55.1668	52.0271	-1.45308	2.87107e-29	6.47445e-28	S000003317	YGR085C	RPL11B	Ribosomal Protein of the Large subunit
YDR528W	52.3772	59.3434	19.0281	18.7898	-1.56173	3.85329e-29	8.63477e-28	S000002936	YDR528W	HLR1	Homologue of LRe1
YCL005W-A	33.4789	39.2117	10.3253	10.0265	-1.83466	5.34588e-29	1.19046e-27	S000028508	YCL005W-A	VMA9	Vacuolar Membrane Atpase
YPR035W	929.765	1000.42	362.714	284.767	-1.57564	6.58893e-29	1.45816e-27	S000006239	YPR035W	GLN1	GLutamiNe metabolism
YLR388W	64.976	84.0573	24.707	23.8425	-1.61687	6.73784e-29	1.4865e-27	S000004380	YLR388W	RPS29A	Ribosomal Protein of the Small subunit
YKL137W	235.06	187.044	72.9411	81.7117	-1.44901	7.14601e-29	1.57168e-27	S000001620	YKL137W	CMC1	Cx9C Mitochondrial protein necessary for full assembly of Cytochrome c oxidase
YHR039C-A	459.433	462.954	181.873	194.529	-1.29315	8.21358e-29	1.80092e-27	S000002100	YHR039C-A	VMA10
YPR020W	387.166	395.122	143.67	165.476	-1.3396	8.62079e-29	1.88441e-27	S000006224	YPR020W	ATP20	ATP synthase
YDL136W	107.302	137.091	44.3252	44.6059	-1.45787	8.84387e-29	1.92726e-27	S000002295	YDL136W	RPL35B	Ribosomal Protein of the Large subunit
YKR057W	569.496	659.087	239.4	230.846	-1.38538	1.97536e-28	4.26558e-27	S000001765	YKR057W	RPS21A	Ribosomal Protein of the Small subunit
YDR453C	117.919	122.668	50.5941	55.185	-1.18578	1.99158e-28	4.28762e-27	S000002861	YDR453C	TSA2	Thiol-Specific Antioxidant
YPR099C	86.1392	96.9777	35.2536	39.6322	-1.29026	2.09072e-28	4.47401e-27	S000006303	YPR099C
YFR044C	273.918	321.281	118.373	112.739	-1.36449	2.11848e-28	4.51985e-27	S000001940	YFR044C	DUG1	Deficient in Utilization of Glutathione
YPR106W	114.168	127.926	52.5117	51.8692	-1.21322	2.72475e-28	5.77874e-27	S000006310	YPR106W	ISR1	Inhibition of Staurosporine Resistance
YML026C	669.72	898.414	252.012	250.898	-1.64058	2.82988e-28	5.9839e-27	S000004488	YML026C	RPS18B	Ribosomal Protein of the Small subunit
YGL030W	1173.11	1455.19	456.38	465.954	-1.51073	2.8909e-28	6.09483e-27	S000002998	YGL030W	RPL30	Ribosomal Protein of the Large subunit
YMR194W	191.035	241.956	74.4161	83.6065	-1.45421	2.90298e-28	6.10225e-27	S000004807	YMR194W	RPL36A	Ribosomal Protein of the Large subunit
YOR189W	106.382	117.635	48.8978	47.7639	-1.21203	2.98016e-28	6.24606e-27	S000005715	YOR189W	IES4	Ino Eighty Subunit
YML001W	216.304	216.04	97.3531	96.9488	-1.15379	3.96855e-28	8.26898e-27	S000004460	YML001W	YPT7	Yeast Protein Two
YCL035C	619.183	649.623	231.73	263.53	-1.3573	4.45906e-28	9.26393e-27	S000000540	YCL035C	GRX1	GlutaRedoXin
YMR225C	136.676	135.739	59.5181	64.5799	-1.13467	4.55915e-28	9.41987e-27	S000004838	YMR225C	MRPL44	Mitochondrial Ribosomal Protein
YGL232W	83.945	87.2123	36.4337	39.3953	-1.17479	6.1656e-28	1.26617e-26	S000003201	YGL232W	TAN1	Trna AcetylatioN
YGL226C-A	69.5059	91.8696	24.117	27.553	-1.64294	6.30582e-28	1.29124e-26	S000003194	YGL226C-A	OST5	OligoSaccharylTransferase
YBL036C	142.197	140.696	60.5507	67.0273	-1.14932	7.24691e-28	1.47547e-26	S000000132	YBL036C
YHR010W	881.989	979.993	375.104	354.795	-1.35098	7.94248e-28	1.6079e-26	S000001052	YHR010W	RPL27A	Ribosomal Protein of the Large subunit
YER131W	402.455	535.142	158.273	155.923	-1.57713	8.69712e-28	1.75072e-26	S000000933	YER131W	RPS26B	Ribosomal Protein of the Small subunit
YGR185C	165.837	208.378	74.1949	73.58	-1.34005	9.09163e-28	1.81986e-26	S000003417	YGR185C	TYS1	TYrosyl-tRNA Synthetase
YDR418W	127.899	171.42	54.503	49.4218	-1.52526	9.57434e-28	1.91111e-26	S000002826	YDR418W	RPL12B	Ribosomal Protein of the Large subunit
YDR382W	475.146	663.97	167.492	181.424	-1.70691	1.31164e-27	2.59633e-26	S000002790	YDR382W	RPP2B	Ribosomal Protein P2 Beta
YLR262C-A	178.79	150.312	69.7697	69.08	-1.24513	2.19084e-27	4.28898e-26	S000007246	YLR262C-A	TMA7	Translation Machinery Associated
YBL059C-A	383.557	303.928	100.524	125.054	-1.60807	2.82278e-27	5.48097e-26	S000007488	YBL059C-A	CMC2	Cx9C Motif-Containing protein
YOL077W-A	448.037	349.45	129.583	147.16	-1.52714	3.30669e-27	6.38576e-26	S000007339	YOL077W-A	ATP19	ATP synthase
YLR325C	499.211	612.139	209.162	206.056	-1.42024	3.81133e-27	7.34041e-26	S000004317	YLR325C	RPL38	Ribosomal Protein of the Large subunit
YBL026W	220.48	174.8	68.7372	78.8696	-1.42165	3.98844e-27	7.66082e-26	S000000122	YBL026W	LSM2	Like SM
YKL156W	200.378	252.022	81.8651	89.6855	-1.3989	4.53373e-27	8.61529e-26	S000001639	YKL156W	RPS27A	Ribosomal Protein of the Small subunit
YLL045C	273.14	362.821	112.104	102.002	-1.57023	4.66149e-27	8.83452e-26	S000003968	YLL045C	RPL8B	Ribosomal Protein of the Large subunit
YER057C	179.852	187.12	88.2816	81.9486	-1.10772	5.48817e-27	1.03462e-25	S000000859	YER057C	HMF1	Homologous Mmf1p Factor
YKL167C	155.362	163.157	65.1971	75.3169	-1.1811	6.40617e-27	1.19817e-25	S000001650	YKL167C	MRP49	Mitochondrial Ribosomal Protein
YKL122C	108.01	117.936	45.7265	51.4744	-1.21725	9.04867e-27	1.67919e-25	S000001605	YKL122C	SRP21	Signal Recognition Particle
YFL014W	7345.97	7212.33	2918.38	2967.04	-1.30662	1.60587e-26	2.96461e-25	S000001880	YFL014W	HSP12	Heat Shock Protein
YKL172W	169.235	174.65	82.8976	80.3696	-1.0744	1.64872e-26	3.03586e-25	S000001655	YKL172W	EBP2	EBNA1-binding protein (homolog)
YDR071C	268.185	277.787	117.93	121.107	-1.19156	1.93459e-26	3.55306e-25	S000002478	YDR071C	PAA1	PolyAmine Acetyltransferase
YGR105W	68.6566	69.7848	27.2884	30.3952	-1.26364	2.45288e-26	4.4794e-25	S000003337	YGR105W	VMA21	Vacuolar Membrane Atpase
YKL003C	170.863	177.955	69.0322	82.6591	-1.20187	2.45599e-26	4.4794e-25	S000001486	YKL003C	MRP17	Mitochondrial Ribosomal Protein
YPL267W	55.2791	68.2074	15.193	20.2898	-1.8002	2.61913e-26	4.7612e-25	S000006188	YPL267W	ACM1	APC/C[Cdh1] Modulator
YLR372W	146.515	168.415	69.0322	71.1326	-1.16768	4.0363e-26	7.28169e-25	S000004364	YLR372W	ELO3	fatty acid ELOngation
YNL070W	67.878	72.2638	28.6897	31.0268	-1.23086	4.91482e-26	8.82191e-25	S000005014	YNL070W	TOM7	Translocase of the Outer Mitochondrial membrane
YER056C-A	272.857	380.324	103.991	108.633	-1.61901	4.98543e-26	8.92617e-25	S000002135	YER056C-A	RPL34A	Ribosomal Protein of the Large subunit
YML073C	342.787	454.315	141.162	140.923	-1.49845	5.18993e-26	9.26904e-25	S000004538	YML073C	RPL6A	Ribosomal Protein of the Large subunit
YCR003W	104.825	98.9307	39.9	48.0007	-1.21402	5.24168e-26	9.33805e-25	S000000596	YCR003W	MRPL32	Mitochondrial Ribosomal Protein
YJL096W	178.861	184.866	84.6677	88.896	-1.06745	6.98126e-26	1.23445e-24	S000003632	YJL096W	MRPL49	Mitochondrial Ribosomal Protein
YKL053C-A	166.262	163.683	74.1949	80.4486	-1.09358	7.99443e-26	1.41011e-24	S000007243	YKL053C-A	MDM35	Mitochondrial Distribution and Morphology
YIL002W-A	62.3571	68.5078	25.002	27.553	-1.31635	1.08613e-25	1.90635e-24	S000028835	YIL002W-A
YER067W	775.678	842	263.886	329.61	-1.44672	1.24447e-25	2.1789e-24	S000000869	YER067W	RGI1	Respiratory Growth Induced
YML024W	686.707	899.09	282.25	276.32	-1.5053	1.79703e-25	3.13096e-24	S000004486	YML024W	RPS17A	Ribosomal Protein of the Small subunit
YKR085C	146.868	157.598	72.6461	71.4484	-1.07894	1.87038e-25	3.2429e-24	S000001793	YKR085C	MRPL20	Mitochondrial Ribosomal Protein
YFL034C-A	74.319	96.6772	24.707	31.8163	-1.59765	3.22216e-25	5.51873e-24	S000006436	YFL034C-A	RPL22B	Ribosomal Protein of the Large subunit
YHR147C	187.355	188.772	88.2816	90.475	-1.07323	3.22946e-25	5.51873e-24	S000001190	YHR147C	MRPL6	Mitochondrial Ribosomal Protein
YDL191W	351.706	408.869	160.928	156.239	-1.26166	3.70688e-25	6.30435e-24	S000002350	YDL191W	RPL35A	Ribosomal Protein of the Large subunit
YLL024C	499.353	709.792	200.68	177.634	-1.67611	5.82958e-25	9.77449e-24	S000003947	YLL024C	SSA2	Stress-Seventy subfamily A
YEL026W	70.0014	98.5551	25.9608	28.8162	-1.62123	6.73244e-25	1.12369e-23	S000000752	YEL026W	SNU13	Small NUclear ribonucleoprotein associated
YPL079W	380.584	510.804	162.181	142.186	-1.54993	6.93253e-25	1.15423e-23	S000006000	YPL079W	RPL21B	Ribosomal Protein of the Large subunit
YGR041W	129.74	141.222	65.0496	63.6325	-1.07385	7.58362e-25	1.25966e-23	S000003273	YGR041W	BUD9	BUD site selection
YHL015W	891.474	1236.9	338.376	359.453	-1.60876	8.05228e-25	1.33134e-23	S000001007	YHL015W	RPS20	Ribosomal Protein of the Small subunit
YHR063W-A	15.0761	14.4978	3.68762	2.84215	-2.17179	8.72953e-25	1.43997e-23	S000028778	YHR063W-A
YHR060W	115.654	117.41	55.9043	55.4219	-1.06571	9.13617e-25	1.50356e-23	S000001102	YHR060W	VMA22	Vacuolar Membrane Atpase
YKL161C	134.482	160.302	62.4682	66.3957	-1.19365	1.038e-24	1.70041e-23	S000001644	YKL161C	KDX1	Kinase Dead X-talker
YDR450W	646.858	809.399	283.357	265.741	-1.407	1.40358e-24	2.28877e-23	S000002858	YDR450W	RPS18A	Ribosomal Protein of the Small subunit
YIL148W	766.051	892.405	333.803	339.873	-1.29966	1.71606e-24	2.77294e-23	S000001410	YIL148W	RPL40A	Ribosomal Protein of the Large subunit
YIL133C	391.979	501.414	170.147	169.502	-1.3951	1.96911e-24	3.17463e-23	S000001395	YIL133C	RPL16A	Ribosomal Protein of the Large subunit
YJL130C	483.427	471.292	214.693	210.477	-1.16699	2.01907e-24	3.24783e-23	S000003666	YJL130C	URA2	URAcil requiring
YBR088C	28.0289	42.9676	5.97394	7.34221	-2.41394	2.74153e-24	4.39014e-23	S000000292	YBR088C	POL30	POLymerase
YBR137W	118.769	116.208	54.4292	57.9482	-1.06447	3.46135e-24	5.50572e-23	S000000341	YBR137W
YHR072W-A	61.9325	62.0477	27.3621	24.474	-1.25679	3.80235e-24	6.03464e-23	S000007455	YHR072W-A	NOP10	NucleOlar Protein
YDR114C	67.3825	76.4704	31.0497	30.711	-1.21905	4.81748e-24	7.62541e-23	S000002521	YDR114C
YPR063C	163.997	166.763	83.5614	79.8959	-1.01655	4.82607e-24	7.62541e-23	S000006267	YPR063C
YNL185C	76.6547	83.3813	38.0562	36.2374	-1.10619	4.92666e-24	7.75909e-23	S000005129	YNL185C	MRPL19	Mitochondrial Ribosomal Protein
YDR274C	69.2228	55.888	23.3795	20.8424	-1.49971	5.06817e-24	7.95502e-23	S000002682	YDR274C
YAL012W	140.074	188.697	63.2795	62.1325	-1.38988	5.08279e-24	7.96043e-23	S000000010	YAL012W	CYS3	CYStathionine gamma-lyase
YLR351C	138.587	160.903	70.1385	65.1325	-1.14596	5.39938e-24	8.43771e-23	S000004343	YLR351C	NIT3	NITrilase superfamily
YGR037C	193.017	224.754	83.7827	95.9225	-1.21722	5.43257e-24	8.47101e-23	S000003269	YGR037C	ACB1	Acyl-CoA-Binding
YHR191C	52.0233	53.1086	20.2819	21.474	-1.33222	6.0098e-24	9.28976e-23	S000001234	YHR191C	CTF8	Chromosome Transmission Fidelity
YKL192C	406.277	419.235	179.513	190.74	-1.15682	8.67602e-24	1.33244e-22	S000001675	YKL192C	ACP1	Acyl Carrier Protein
YDR248C	97.7471	108.696	47.054	50.3692	-1.08339	1.11184e-23	1.70021e-22	S000002656	YDR248C
YOR115C	105.745	103.137	43.8826	52.185	-1.12153	1.24591e-23	1.90115e-22	S000005641	YOR115C	TRS33	TRapp Subunit
YJL177W	360.765	476.851	160.264	148.897	-1.43768	1.30986e-23	1.99446e-22	S000003713	YJL177W	RPL17B	Ribosomal Protein of the Large subunit
YOL109W	4487.59	4072.54	1491.79	1798.92	-1.37926	2.47339e-23	3.7106e-22	S000005469	YOL109W	ZEO1	ZEOcin resistance
YNL110C	66.1085	71.7379	29.0584	31.8163	-1.17934	2.53944e-23	3.8017e-22	S000005054	YNL110C	NOP15	NucleOlar Protein
YDR303C	66.8871	77.7474	29.7222	31.5794	-1.23813	2.77561e-23	4.14654e-22	S000002711	YDR303C	RSC3	Remodel the Structure of Chromatin
YJL127C-B	89.8198	68.7332	30.3122	30.9478	-1.37244	3.49527e-23	5.21073e-22	S000028522	YJL127C-B
YKL067W	945.549	916.142	392.141	423.006	-1.19152	3.67988e-23	5.4745e-22	S000001550	YKL067W	YNK1	Yeast Nucleoside diphosphate Kinase
YGL245W	346.397	411.122	166.017	149.371	-1.26385	4.3767e-23	6.45325e-22	S000003214	YGL245W	GUS1	GlUtamyl-tRNA Synthetase
YCL007C	51.3155	58.5171	14.308	19.974	-1.68133	4.39881e-23	6.46307e-22	S000000513	YCL007C
YIL016W	49.1213	55.4373	20.7982	18.7898	-1.39944	5.96475e-23	8.74585e-22	S000001278	YIL016W	SNL1	Suppressor of Nup116-C Lethal
YDR002W	364.021	413.301	164.468	176.134	-1.19041	6.34366e-23	9.28232e-22	S000002409	YDR002W	YRB1	Yeast Ran Binder
YLR301W	62.711	63.2496	28.3209	27.8688	-1.16415	7.01956e-23	1.02293e-21	S000004292	YLR301W	HRI1	HRr25 Interacting
YGR027C	606.867	715.276	282.84	269.057	-1.26028	7.40102e-23	1.07413e-21	S000003259	YGR027C	RPS25A	Ribosomal Protein of the Small subunit
YGL229C	50.6784	59.0429	20.7982	21.2372	-1.38343	9.24642e-23	1.33381e-21	S000003198	YGL229C	SAP4	Sit4 Associated Protein
YBR111W-A	139.507	116.809	45.0627	57.2377	-1.32618	9.68053e-23	1.39361e-21	S000028510	YBR111W-A	SUS1	Sl gene Upstream of ySa1
YLR197W	159.609	202.894	75.8912	79.1854	-1.22476	1.13403e-22	1.62598e-21	S000004187	YLR197W	NOP56	NucleOlar Protein of 56.8 kDa
YLL014W	158.83	139.645	59.3706	71.6853	-1.18825	1.13691e-22	1.62683e-21	S000003937	YLL014W	EMC6	ER Membrane protein Complex
YER053C	803.99	838.32	375.547	345.716	-1.18703	1.16999e-22	1.67082e-21	S000000855	YER053C	PIC2	PI Carrier
YGL068W	47.8472	46.9489	19.6919	17.3687	-1.35338	1.56064e-22	2.21978e-21	S000003036	YGL068W	MNP1	Mitochondrial-Nucleoid Protein
YIL027C	83.7327	72.414	32.5985	36.7111	-1.17285	2.26507e-22	3.19621e-21	S000001289	YIL027C	EMC5	ER Membrane protein Complex
YPR028W	525.47	499.386	231.73	237.319	-1.12763	2.32268e-22	3.27104e-21	S000006232	YPR028W	YOP1	YIP One Partner
YEL051W	232.937	255.102	111.44	117.318	-1.09315	2.34335e-22	3.29363e-21	S000000777	YEL051W	VMA8	Vacuolar Membrane Atpase
YDR363W-A	206.04	191.476	85.6265	99.0804	-1.10626	2.42172e-22	3.39041e-21	S000007235	YDR363W-A	SEM1	Suppressor of Exocyst Mutations
YGR118W	653.653	754.638	309.391	292.11	-1.22719	2.4937e-22	3.47751e-21	S000003350	YGR118W	RPS23A	Ribosomal Protein of the Small subunit
YPR133W-A	41.1232	48.6015	15.0455	16.7371	-1.4971	2.74579e-22	3.82159e-21	S000006433	YPR133W-A	TOM5	Translocase of the Outer Mitochondrial membrane
YOL127W	940.029	1239.68	399.369	416.375	-1.4179	2.83191e-22	3.93376e-21	S000005487	YOL127W	RPL25	Ribosomal Protein of the Large subunit
YBR126W-B	67.0994	84.9587	27.8046	31.5005	-1.35833	2.8979e-22	4.0098e-21	S000028738	YBR126W-B
YNL046W	161.024	165.035	84.0039	73.8169	-1.04619	3.01927e-22	4.16964e-21	S000004991	YNL046W
YAL007C	84.2281	82.0291	41.7438	41.1322	-1.00422	3.16379e-22	4.36077e-21	S000000005	YAL007C	ERP2	Emp24p/Erv25p Related Protein
YPR132W	640.771	737.811	302.532	293.294	-1.21013	3.75371e-22	5.14402e-21	S000006336	YPR132W	RPS23B	Ribosomal Protein of the Small subunit
YDR381C-A	408.967	359.666	157.904	177.397	-1.19704	4.78738e-22	6.49808e-21	S000007650	YDR381C-A
YOR232W	283.969	293.262	124.568	139.502	-1.12839	5.28281e-22	7.1569e-21	S000005758	YOR232W	MGE1	Mitochondrial GrpE
YHL034W-A	19.606	19.9815	5.08891	6.31588	-1.79681	5.51392e-22	7.45582e-21	S000028774	YHL034W-A
YML056C	102.277	148.959	36.5074	45.0796	-1.62274	6.67758e-22	8.97819e-21	S000004520	YML056C	IMD4	IMP Dehydrogenase
YNR032C-A	67.9488	62.6486	27.8046	30.1583	-1.17264	6.96935e-22	9.35284e-21	S000007251	YNR032C-A	HUB1	Homologous to UBiquitin
YHR063C	94.6328	107.494	50.1516	44.8428	-1.08819	8.47858e-22	1.12931e-20	S000001105	YHR063C	PAN5	PANtothenate biosynthesis
YOL090W	105.816	131.757	48.6766	53.1324	-1.22236	8.67563e-22	1.15315e-20	S000005450	YOL090W	MSH2	MutS Homolog
YER066C-A	1171.13	1293.84	393.911	521.139	-1.42972	9.17971e-22	1.21589e-20	S000002959	YER066C-A
YMR123W	52.0233	58.2166	22.642	22.5793	-1.28478	9.88589e-22	1.30457e-20	S000004730	YMR123W	PKR1	Pichia farinosa Killer toxin Resistance
YJR058C	83.4496	82.9305	42.9976	39.869	-1.0049	1.07155e-21	1.41143e-20	S000003819	YJR058C	APS2	clathrin Associated Protein complex Small subunit
YLR264C-A	32.1341	43.6437	10.6941	10.9738	-1.80468	1.1158e-21	1.46431e-20	S000028808	YLR264C-A
YAL030W	163.643	177.73	81.2751	88.1855	-1.01049	1.22593e-21	1.60293e-20	S000000028	YAL030W	SNC1	Suppressor of the Null allele of CAP
YDR410C	37.7965	40.038	15.193	15.0792	-1.36152	2.01765e-21	2.62848e-20	S000002818	YDR410C	STE14	STErile
YEL017C-A	103.976	100.208	49.1928	52.8955	-1.0005	2.16484e-21	2.81508e-20	S000002103	YEL017C-A	PMP2	Plasma Membrane Proteolipid
YGL041W-A	99.3751	96.3016	44.0302	51.0797	-1.04169	2.17918e-21	2.82857e-20	S000028826	YGL041W-A
YEL021W	283.757	311.59	138.581	137.291	-1.10958	2.20144e-21	2.85226e-20	S000000747	YEL021W	URA3	URAcil requiring
YLR171W	30.1523	28.8454	8.33402	10.737	-1.63144	2.28369e-21	2.94811e-20	S000004161	YLR171W
YOR293W	660.589	801.812	315.513	293.767	-1.26303	2.47702e-21	3.19191e-20	S000005819	YOR293W	RPS10A	Ribosomal Protein of the Small subunit
YNR022C	228.195	222.35	105.466	116.133	-1.02397	2.51487e-21	3.22319e-20	S000005305	YNR022C	MRPL50	Mitochondrial Ribosomal Protein
YDL072C	524.338	502.541	232.467	245.293	-1.10396	2.61082e-21	3.32821e-20	S000002230	YDL072C	YET3	Yeast Endoplasmic reticulum Transmembrane protein
YHL001W	177.728	215.589	90.1254	89.7645	-1.12825	2.76454e-21	3.51787e-20	S000000993	YHL001W	RPL14B	Ribosomal Protein of the Large subunit
YIL059C	56.8363	50.6297	20.2819	22.6582	-1.32445	2.78871e-21	3.54231e-20	S000001321	YIL059C
YOR169C	9.34295	10.4414	1.77006	2.13161	-2.33928	3.07297e-21	3.87574e-20	S000005695	YOR169C
YPR060C	35.1069	49.1273	7.37524	11.3686	-2.1694	3.12634e-21	3.93609e-20	S000006264	YPR060C	ARO7	AROmatic amino acid requiring
YDR471W	410.948	515.461	197.73	170.055	-1.3325	3.19577e-21	4.01642e-20	S000002879	YDR471W	RPL27B	Ribosomal Protein of the Large subunit
YOR253W	76.1592	70.6863	33.2623	36.5532	-1.0735	3.34135e-21	4.19199e-20	S000005779	YOR253W	NAT5	N-terminal AcetylTransferase
YMR244C-A	44.0251	42.4418	16.4468	18.0792	-1.32511	3.74383e-21	4.68045e-20	S000004857	YMR244C-A	COA6	Cytochrome Oxidase Assembly
YBR164C	70.0722	78.5737	33.5573	36.4742	-1.08582	4.10677e-21	5.11623e-20	S000000368	YBR164C	ARL1	ADP-Ribosylation factor-Like
YLR303W	419.513	526.278	184.823	203.056	-1.28589	4.4053e-21	5.47856e-20	S000004294	YLR303W	MET17	METhionine requiring
YPL059W	181.692	184.19	83.0451	95.5277	-1.03526	4.86992e-21	6.03531e-20	S000005980	YPL059W	GRX5	GlutaRedoXin
YPR166C	155.999	132.809	58.8544	70.501	-1.15959	6.51128e-21	7.95873e-20	S000006370	YPR166C	MRP2	Mitochondrial Ribosomal Protein
YML063W	833.08	1061.65	384.914	381.637	-1.30547	7.1135e-21	8.6503e-20	S000004528	YML063W	RPS1B	Ribosomal Protein of the Small subunit
YBR031W	134.977	177.955	68.0734	61.2641	-1.27393	7.21415e-21	8.75775e-20	S000000235	YBR031W	RPL4A	Ribosomal Protein of the Large subunit
YBR082C	338.541	394.221	165.722	168.002	-1.13457	7.65059e-21	9.27179e-20	S000000286	YBR082C	UBC4	UBiquitin-Conjugating
YDL181W	340.168	336.755	161.296	166.976	-1.04413	8.11503e-21	9.81795e-20	S000002340	YDL181W	INH1	INHibitor (of F1F0-ATPase)
YDR174W	329.41	364.399	162.476	165.555	-1.08062	8.14373e-21	9.83597e-20	S000002581	YDR174W	HMO1	High MObility group (HMG) family
YER102W	161.803	217.017	79.21	78.6327	-1.26261	8.67354e-21	1.04405e-19	S000000904	YER102W	RPS8B	Ribosomal Protein of the Small subunit
YPL273W	118.769	134.612	62.9108	62.4483	-1.0148	8.90418e-21	1.07e-19	S000006194	YPL273W	SAM4	S-AdenosylMethionine metabolism
YLR287C-A	602.833	690.412	225.461	287.215	-1.33499	1.11994e-20	1.34129e-19	S000004278	YLR287C-A	RPS30A	Ribosomal Protein of the Small subunit
YIR032C	41.7602	40.4887	17.0368	14.0528	-1.40129	1.19602e-20	1.43001e-19	S000001471	YIR032C	DAL3	Degradation of Allantoin
YHR209W	270.875	316.098	124.346	137.134	-1.16661	1.27844e-20	1.52599e-19	S000001252	YHR209W	CRG1	Cantharidin Resistance Gene
YGL135W	125.21	170.594	60.4032	60.1588	-1.29435	1.28594e-20	1.53237e-19	S000003103	YGL135W	RPL1B	Ribosomal Protein of the Large subunit
YGL189C	680.974	904.048	306.367	311.215	-1.35973	1.35501e-20	1.6093e-19	S000003157	YGL189C	RPS26A	Ribosomal Protein of the Small subunit
YER145C-A	35.4608	37.7845	13.3492	14.7634	-1.38172	1.36728e-20	1.62117e-19	S000028758	YER145C-A
YDL061C	113.814	143.551	58.4119	48.6323	-1.26443	1.3752e-20	1.62785e-19	S000002219	YDL061C	RPS29B	Ribosomal Protein of the Small subunit
YPR102C	153.876	216.941	72.1298	73.1853	-1.35115	1.64638e-20	1.9424e-19	S000006306	YPR102C	RPL11A	Ribosomal Protein of the Large subunit
YBR175W	19.5353	20.0566	6.63771	5.84219	-1.66206	1.68661e-20	1.98658e-19	S000000379	YBR175W	SWD3	Set1c
YBL092W	783.534	1060.07	359.321	341.768	-1.39476	1.77132e-20	2.07606e-19	S000000188	YBL092W	RPL32	Ribosomal Protein of the Large subunit
YDR424C	139.72	114.105	52.8067	60.0798	-1.1697	2.19348e-20	2.54572e-19	S000002832	YDR424C	DYN2	DYNein
YLR183C	70.0722	90.3672	31.566	35.0531	-1.2678	3.1069e-20	3.58249e-19	S000004173	YLR183C	TOS4	Target Of Sbf
YLR258W	1556.88	1519.34	731.845	689.536	-1.11383	3.52512e-20	4.05162e-19	S000004248	YLR258W	GSY2	Glycogen SYnthase
YOR224C	97.6763	122.217	51.0366	42.7901	-1.2274	4.07839e-20	4.67245e-19	S000005750	YOR224C	RPB8	RNA Polymerase B
YLR344W	320.138	443.573	147.136	148.581	-1.36864	5.72725e-20	6.49878e-19	S000004336	YLR344W	RPL26A	Ribosomal Protein of the Large subunit
YGR008C	2086.03	1725.09	760.092	839.46	-1.25258	6.56689e-20	7.42788e-19	S000003240	YGR008C	STF2	STabilizing Factor
YBL028C	44.0251	45.5217	16.668	19.5003	-1.3088	6.80254e-20	7.68223e-19	S000000124	YBL028C
YNL303W	9.41373	9.23954	1.6963	2.21056	-2.25525	7.85232e-20	8.78424e-19	S000005247	YNL303W
YOL159C	97.9595	106.142	45.4314	53.8429	-1.0404	8.64483e-20	9.62548e-19	S000005519	YOL159C		Condition Specific Secretion
YOL139C	309.096	364.023	157.314	155.213	-1.1067	1.02419e-19	1.13153e-18	S000005499	YOL139C	CDC33	Cell Division Cycle
YGL123W	658.749	895.259	311.456	274.504	-1.40696	1.0472e-19	1.15517e-18	S000003091	YGL123W	RPS2	Ribosomal Protein of the Small subunit
YDR513W	806.891	827.578	366.254	398.848	-1.09513	1.08455e-19	1.19451e-18	S000002921	YDR513W	GRX2	GlutaRedoXin
YOR310C	140.215	192.152	65.7133	70.58	-1.28583	1.12891e-19	1.24145e-18	S000005837	YOR310C	NOP58	NucleOlar Protein of 58 kDa
YOL039W	273.14	395.347	124.051	122.37	-1.43954	1.46275e-19	1.60609e-18	S000005399	YOL039W	RPP2A	Ribosomal Protein P2 Alpha
YDL192W	309.662	372.662	159.01	152.292	-1.13191	1.61881e-19	1.77198e-18	S000002351	YDL192W	ARF1	ADP-Ribosylation Factor
YNL178W	856.721	1104.09	415.595	389.769	-1.28364	1.94063e-19	2.11129e-18	S000005122	YNL178W	RPS3	Ribosomal Protein of the Small subunit
YPR062W	302.938	298.67	153.11	142.028	-1.02725	2.23987e-19	2.42943e-18	S000006266	YPR062W	FCY1	FluoroCYtosine resistance
YBR052C	415.266	437.639	207.613	210.161	-1.02962	2.39874e-19	2.59778e-18	S000000256	YBR052C	RFS1	Rad55 (Fifty-five) Suppressor
YHR087W	319.005	375.065	159.231	165.002	-1.09796	2.48782e-19	2.69016e-18	S000001129	YHR087W	RTC3	Restriction of Telomere Capping
YMR184W	95.5529	115.682	46.6115	51.8692	-1.10091	2.61109e-19	2.81067e-18	S000004796	YMR184W	ADD37	Alpha1-proteinase inhibitor-Degradation Deficient
YDL092W	113.885	128.602	55.388	63.0799	-1.03365	3.2056e-19	3.43506e-18	S000002250	YDL092W	SRP14	Signal Recognition Particle
YDL232W	38.0088	42.7423	15.488	16.7371	-1.32505	3.26332e-19	3.49165e-18	S000002391	YDL232W	OST4	OligoSaccharylTransferase
YPR052C	68.0903	75.1182	36.2124	31.8952	-1.07076	3.85996e-19	4.11153e-18	S000006256	YPR052C	NHP6A	Non-Histone Protein
YGR205W	71.2046	84.508	35.8436	38.1321	-1.07345	4.13155e-19	4.3877e-18	S000003437	YGR205W	TDA10	Topoisomerase I Damage Affected
YDL075W	659.598	810.301	330.927	308.215	-1.20138	4.61074e-19	4.87479e-18	S000002233	YDL075W	RPL31A	Ribosomal Protein of the Large subunit
YLR038C	775.465	705.961	318.241	360.242	-1.1267	4.63213e-19	4.89016e-18	S000004028	YLR038C	COX12	Cytochrome c OXidase
YGR215W	108.86	111.4	50.0041	58.8167	-1.01792	5.34077e-19	5.60506e-18	S000003447	YGR215W	RSM27	Ribosomal Small subunit of Mitochondria
YJR086W	96.4023	91.494	42.3339	50.4481	-1.01907	5.71411e-19	5.97049e-18	S000003846	YJR086W	STE18	STErile
YBR211C	59.8798	59.1181	25.9608	29.2899	-1.10765	9.9736e-19	1.02262e-17	S000000415	YBR211C	AME1	Associated with Microtubules and Essential
YOR051C	70.0722	92.6959	34.3686	35.5268	-1.21888	1.19609e-18	1.21936e-17	S000005577	YOR051C	ETT1	Enhancer of Translation Termination 1
YCR020W-B	36.4517	38.4605	14.8242	16.1055	-1.2763	1.39765e-18	1.41876e-17	S000006439	YCR020W-B	HTL1	High-Temperature Lethal
YIL051C	645.584	676.44	324.658	322.189	-1.03121	1.41264e-18	1.4299e-17	S000001313	YIL051C	MMF1	Mitochondrial Matrix Factor
YCR043C	51.6694	68.2825	22.8632	23.4477	-1.37214	1.43751e-18	1.45301e-17	S000000639	YCR043C
YMR260C	263.938	316.022	134.672	135.949	-1.09951	1.52295e-18	1.53502e-17	S000004873	YMR260C	TIF11	Translation Initiation Factor
YDR379C-A	254.525	217.092	98.3856	118.502	-1.12115	1.65124e-18	1.65962e-17	S000007605	YDR379C-A	SDH6
YGR169C-A	79.769	97.6537	41.1538	43.1059	-1.07385	2.19177e-18	2.19054e-17	S000028521	YGR169C-A	LSO2	Late-annotated Small Open reading frame
YMR242C	386.954	520.945	187.036	189.082	-1.27121	2.24241e-18	2.23488e-17	S000004855	YMR242C	RPL20A	Ribosomal Protein of the Large subunit
YHR174W	1565.94	2227.41	733.393	596.377	-1.51222	2.27663e-18	2.26266e-17	S000001217	YHR174W	ENO2	ENOlase
YML022W	103.551	121.166	52.0692	57.4745	-1.03661	2.53004e-18	2.4971e-17	S000004484	YML022W	APT1	Adenine PhosphoribosylTransferase
YKR074W	272.644	237.975	115.349	129.081	-1.06313	2.55713e-18	2.52035e-17	S000001782	YKR074W	AIM29	Altered Inheritance rate of Mitochondria
YFR053C	2687.66	2915.19	1361.91	1222.75	-1.11615	3.21347e-18	3.15416e-17	S000001949	YFR053C	HXK1	HeXoKinase
YIL111W	203.563	234.068	97.2056	112.896	-1.05878	3.59125e-18	3.51045e-17	S000001373	YIL111W	COX5B	Cytochrome c OXidase
YBR252W	51.8109	64.0007	21.7569	25.1846	-1.30292	3.75716e-18	3.66761e-17	S000000456	YBR252W	DUT1	DUTp pyrophosphatase
YHR043C	78.495	90.217	39.6788	44.2901	-1.00675	3.92833e-18	3.82945e-17	S000001085	YHR043C	DOG2	DeOxyGlucose
YOR276W	82.8125	99.2312	41.7438	46.1849	-1.04982	4.04229e-18	3.93516e-17	S000005802	YOR276W	CAF20	Cap Associated Factor
YKL180W	536.512	666.75	277.899	250.346	-1.1875	4.32582e-18	4.20543e-17	S000001663	YKL180W	RPL17A	Ribosomal Protein of the Large subunit
YOR020C	717.355	812.028	355.339	370.663	-1.07488	4.58711e-18	4.44731e-17	S000005546	YOR020C	HSP10	Heat Shock Protein
YOL120C	637.02	882.714	310.35	289.031	-1.34215	4.68111e-18	4.53228e-17	S000005480	YOL120C	RPL18A	Ribosomal Protein of the Large subunit
YMR143W	700.651	861.606	336.901	358.979	-1.16669	5.20701e-18	5.02099e-17	S000004751	YMR143W	RPS16A	Ribosomal Protein of the Small subunit
YNL147W	115.867	115.832	47.2015	61.1062	-1.09809	5.2882e-18	5.0924e-17	S000005091	YNL147W	LSM7	Like SM
YNL153C	60.7292	71.5126	31.1972	30.3162	-1.10322	6.27741e-18	6.02057e-17	S000005097	YNL153C	GIM3	Gene Involved in Microtubule biogenesis
YDR226W	403.304	497.133	212.776	188.687	-1.16511	7.46346e-18	7.10075e-17	S000002634	YDR226W	ADK1	ADenylate Kinase
YGL031C	549.677	728.947	268.459	272.293	-1.24146	8.70604e-18	8.26088e-17	S000002999	YGL031C	RPL24A	Ribosomal Protein of the Large subunit
YNR046W	44.4498	54.6861	19.9131	20.6845	-1.28723	8.75113e-18	8.29263e-17	S000005329	YNR046W	TRM112	TRna Methyltransferase
YHR030C	237.891	309.863	122.65	119.37	-1.17812	1.02632e-17	9.68682e-17	S000001072	YHR030C	SLT2	Suppressor of the LyTic phenotype
YPR105C	92.1555	113.729	51.9954	47.7639	-1.04429	1.74813e-17	1.6348e-16	S000006309	YPR105C	COG4	Conserved Oligomeric Golgi complex
YML077W	39.2829	48.1508	17.1843	17.7634	-1.32209	1.93279e-17	1.80276e-16	S000004542	YML077W	BET5	Blocked Early in Transport
YJR069C	36.027	46.0475	14.7505	15.7897	-1.42544	2.14621e-17	1.9992e-16	S000003830	YJR069C	HAM1	6-n-HydroxylAMinopurine sensitive
YJR135W-A	171.571	135.513	62.1732	75.4748	-1.1584	2.20418e-17	2.04518e-16	S000007348	YJR135W-A	TIM8	Translocase of the Inner Mitochondrial membrane
YER154W	248.862	269.825	136.663	115.817	-1.03823	2.65279e-17	2.4392e-16	S000000956	YER154W	OXA1	cytochrome OXidase Activity
YLR354C	630.012	728.347	325.764	327.715	-1.05559	2.66191e-17	2.44442e-16	S000004346	YLR354C	TAL1	TransALdolase
YPL037C	375.134	459.874	201.713	177.713	-1.1377	2.69208e-17	2.46895e-16	S000005958	YPL037C	EGD1	Enhancer of Gal4 DNA binding
YKR083C	71.1339	54.3856	18.5856	25.7372	-1.5036	2.99446e-17	2.73922e-16	S000001791	YKR083C	DAD2	Duo1 And Dam1 interacting
YAL033W	46.2193	42.3667	17.9218	20.4477	-1.20825	3.21742e-17	2.93564e-16	S000000031	YAL033W	POP5	Processing Of Precursor RNAs
YBR048W	287.437	403.235	148.463	130.976	-1.30513	4.46585e-17	4.03853e-16	S000000252	YBR048W	RPS11B	Ribosomal Protein of the Small subunit
snR44	29.1613	25.2397	9.95657	10.6581	-1.40068	5.77273e-17	5.1744e-16	S000006504	snR44	SNR44	Small Nucleolar RNA
YBL057C	65.1176	70.536	35.7699	31.5005	-1.01047	6.05772e-17	5.42303e-16	S000000153	YBL057C	PTH2	Peptidyl-Trna Hydrolase
YDL208W	120.184	150.762	67.3359	65.6852	-1.02578	6.80934e-17	6.08062e-16	S000002367	YDL208W	NHP2	Non-Histone Protein
YOR238W	68.1611	75.2685	32.8935	38.4479	-1.00808	7.89131e-17	7.00292e-16	S000005764	YOR238W
YDL082W	328.419	438.014	173.982	157.265	-1.20997	8.04612e-17	7.12257e-16	S000002240	YDL082W	RPL13A	Ribosomal Protein of the Large subunit
YLR292C	94.7744	105.992	44.3252	54.7903	-1.01899	8.83588e-17	7.79263e-16	S000004283	YLR292C	SEC72	SECretory
YMR142C	583.368	752.61	307.326	282.715	-1.17887	1.08694e-16	9.5388e-16	S000004750	YMR142C	RPL13B	Ribosomal Protein of the Large subunit
YER074W	331.887	431.479	177.227	166.345	-1.15153	1.13768e-16	9.95961e-16	S000000876	YER074W	RPS24A	Ribosomal Protein of the Small subunit
YLR406C	389.29	510.579	196.624	204.161	-1.16679	1.29574e-16	1.12878e-15	S000004398	YLR406C	RPL31B	Ribosomal Protein of the Large subunit
YDL228C	15.9963	16.8265	6.04769	4.57901	-1.62092	1.33989e-16	1.16582e-15	S000002387	YDL228C
YDR154C	230.176	247.965	128.993	104.844	-1.03138	1.77685e-16	1.53291e-15	S000002561	YDR154C
YMR290W-A	19.1106	16.4509	5.82644	6.31588	-1.55094	2.24806e-16	1.93708e-15	S000004904	YMR290W-A
YLR285C-A	6.0163	4.58221	0.516266	0.947382	-2.85573	2.94611e-16	2.52029e-15	S000028569	YLR285C-A
YGR271C-A	84.582	71.137	29.0584	39.3164	-1.18907	3.92037e-16	3.31788e-15	S000007608	YGR271C-A	EFG1	Exit From G1
YDR012W	174.685	221.223	100.303	86.9223	-1.07975	3.94203e-16	3.33226e-15	S000002419	YDR012W	RPL4B	Ribosomal Protein of the Large subunit
YGL102C	15.2885	14.7232	5.45767	3.86848	-1.67938	4.10934e-16	3.46547e-15	S000003070	YGL102C
YBR189W	572.327	852.066	282.25	271.267	-1.36353	4.96002e-16	4.16805e-15	S000000393	YBR189W	RPS9B	Ribosomal Protein of the Small subunit
YLR175W	273.777	352.079	135.631	150.871	-1.12725	5.66576e-16	4.7332e-15	S000004165	YLR175W	CBF5	Centromere Binding Factor
YLR170C	20.8093	18.5542	7.00647	7.50011	-1.44066	6.51585e-16	5.43699e-15	S000004160	YLR170C	APS1	clathrin Associated Protein complex Small subunit
YOR312C	495.46	652.402	253.929	262.662	-1.15177	7.00844e-16	5.83437e-15	S000005839	YOR312C	RPL20B	Ribosomal Protein of the Large subunit
YKR094C	380.655	481.433	209.383	194.134	-1.09499	7.93059e-16	6.57898e-15	S000001802	YKR094C	RPL40B	Ribosomal Protein of the Large subunit
YJR010C-A	26.9672	29.9722	10.7678	12.237	-1.30766	8.65495e-16	7.12185e-15	S000003770	YJR010C-A	SPC1	Signal Peptidase Complex
YDR139C	125.493	110.048	49.2666	63.5536	-1.06302	9.9943e-16	8.18614e-15	S000002546	YDR139C	RUB1	Related to UBiquitin
YJL122W	49.2628	54.6861	25.3708	23.8425	-1.07756	1.00181e-15	8.18616e-15	S000003658	YJL122W	ALB1	Arx1 Little Brother
YDL083C	540.051	735.408	275.908	280.662	-1.19629	1.0444e-15	8.50562e-15	S000002241	YDL083C	RPS16B	Ribosomal Protein of the Small subunit
YLR306W	51.9525	50.7048	20.4294	25.6583	-1.15683	1.61546e-15	1.29056e-14	S000004297	YLR306W	UBC12	UBiquitin-Conjugating
YDR510C-A	32.1341	31.1741	13.4229	14.4476	-1.18408	1.75962e-15	1.40101e-14	S000028615	YDR510C-A
YNL184C	28.3828	32.6013	12.6854	12.7107	-1.26254	1.85875e-15	1.475e-14	S000005128	YNL184C
YLR339C	98.2426	146.03	47.8653	52.185	-1.28744	1.88465e-15	1.49389e-14	S000004331	YLR339C
YPL225W	592.357	510.203	223.322	281.925	-1.12599	1.99648e-15	1.57901e-14	S000006146	YPL225W
YFL045C	290.622	374.915	158.125	158.608	-1.07107	2.22812e-15	1.75056e-14	S000001849	YFL045C	SEC53	SECretory
YBR191W	375.842	512.682	193.231	201.398	-1.17081	2.42044e-15	1.89747e-14	S000000395	YBR191W	RPL21A	Ribosomal Protein of the Large subunit
YNR034W-A	8124.26	5520.59	2215.96	2783.41	-1.44855	2.56336e-15	2.00291e-14	S000007525	YNR034W-A	EGO4	Exit from rapamycin-induced GrOwth arrest
YLR333C	202.218	273.055	105.245	114.16	-1.11503	2.83421e-15	2.20487e-14	S000004325	YLR333C	RPS25B	Ribosomal Protein of the Small subunit
YML036W	27.6042	30.7985	12.3166	12.4739	-1.23518	3.23605e-15	2.50381e-14	S000004500	YML036W	CGI121	homolog of human CGI-121
YER134C	51.1031	52.6579	26.6246	24.3161	-1.02523	3.41167e-15	2.63112e-14	S000000936	YER134C
YDR340W	63.7727	53.7847	23.7483	29.132	-1.15408	3.55047e-15	2.72636e-14	S000002748	YDR340W
YKR095W-A	27.8165	29.6717	12.7592	12.0791	-1.2091	5.03095e-15	3.80984e-14	S000028512	YKR095W-A	PCC1	Polarized growth Chromatin-associated Controller
YIL029C	57.1902	50.4795	23.0845	27.0004	-1.10542	5.47786e-15	4.13509e-14	S000001291	YIL029C
YOL056W	22.8619	25.4651	10.1778	9.39488	-1.30158	6.13641e-15	4.60295e-14	S000005417	YOL056W	GPM3	Glycerate PhosphoMutase
YBL027W	853.96	1114	455.642	456.007	-1.11009	6.76945e-15	5.05651e-14	S000000123	YBL027W	RPL19B	Ribosomal Protein of the Large subunit
YBR253W	45.4407	51.2306	23.8958	21.3161	-1.09472	9.01508e-15	6.69182e-14	S000000457	YBR253W	SRB6	Suppressor of RNA polymerase B
YEL059C-A	48.4135	51.9818	25.2233	24.3951	-1.01589	9.1431e-15	6.77979e-14	S000002954	YEL059C-A	SOM1	SOrting Mitochondrial
YEL039C	562.771	593.209	229.739	304.978	-1.11243	1.05638e-14	7.79269e-14	S000000765	YEL039C	CYC7	CYtochrome C
YPL142C	23.2866	25.2397	10.6203	9.39488	-1.27494	1.40499e-14	1.02687e-13	S000006063	YPL142C
YMR122W-A	1307.23	1650.35	710.751	701.458	-1.06642	1.52958e-14	1.1145e-13	S000007524	YMR122W-A		Novel Cell Wall protein
YGL194C	44.7329	43.4935	22.1257	21.474	-1.01644	1.67658e-14	1.21663e-13	S000003162	YGL194C	HOS2	Hda One Similar
YER152W-A	11.8203	12.0189	3.90887	4.10532	-1.57116	1.85914e-14	1.345e-13	S000028761	YER152W-A
YDR417C	99.2335	138.218	53.913	55.8956	-1.11218	2.1534e-14	1.55158e-13	S000002825	YDR417C
YOL077C	55.7038	71.7379	28.3209	30.9478	-1.10411	2.35508e-14	1.69518e-13	S000005437	YOL077C	BRX1	Xenopus laevis Brix (Biogenesis of Ribosomes in Xenopus) homolog
YOL041C	80.3352	91.6443	36.8024	47.7639	-1.02489	2.48358e-14	1.78228e-13	S000005401	YOL041C	NOP12	NucleOlar Protein
YCR020C-A	83.1664	61.8974	28.2472	35.1321	-1.19598	3.2106e-14	2.27423e-13	S000000614	YCR020C-A	MAK31	MAintenance of Killer
YAL003W	457.309	636.477	251.127	239.925	-1.15524	3.84727e-14	2.71442e-13	S000000003	YAL003W	EFB1	Elongation Factor Beta
YDL226C	85.8561	111.4	51.8479	45.948	-1.01107	4.1957e-14	2.94858e-13	S000002385	YDL226C	GCS1	Growth Cold Sensitive
YHR068W	106.524	140.02	61.5095	61.6588	-1.00069	4.96057e-14	3.45205e-13	S000001110	YHR068W	DYS1	DeoxyhYpusine Synthase
YML094W	23.8528	26.8923	10.5466	11.0528	-1.23143	5.29905e-14	3.65901e-13	S000004559	YML094W	GIM5	Gene Involved in Microtubule biogenesis
YKL081W	299.895	411.423	171.032	157.502	-1.11418	6.18828e-14	4.23202e-13	S000001564	YKL081W	TEF4	Translation Elongation Factor
YNL038W	93.9958	74.968	37.7612	45.7112	-1.0186	6.2769e-14	4.28851e-13	S000004983	YNL038W	GPI15	GlycosylPhosphatidylInositol anchor biosynthesis
YKL119C	40.2738	42.7423	17.9218	21.1582	-1.08777	7.6115e-14	5.14607e-13	S000001602	YKL119C	VPH2	Vacuolar pH
YOR309C	11.0417	19.9063	2.36008	3.47374	-2.4062	7.91906e-14	5.33377e-13	S000005836	YOR309C
YDL085C-A	21.3755	24.7139	8.48152	9.94752	-1.32263	9.79197e-14	6.51518e-13	S000007588	YDL085C-A
YEL054C	129.881	172.922	78.3988	71.8432	-1.01042	1.01509e-13	6.74773e-13	S000000780	YEL054C	RPL12A	Ribosomal Protein of the Large subunit
YOL040C	580.113	744.873	332.181	312.084	-1.04013	1.14544e-13	7.56476e-13	S000005400	YOL040C	RPS15	Ribosomal Protein of the Small subunit
YDR031W	555.906	392.718	165.427	219.003	-1.30334	1.16024e-13	7.64836e-13	S000002438	YDR031W	MIX14	Mitochondrial Intermembrane space CX(n)C motif protein
YGL242C	40.2738	49.9536	21.2407	18.8687	-1.1677	1.15963e-13	7.64836e-13	S000003211	YGL242C
YLR169W	32.7003	29.6717	14.898	12.8686	-1.16602	1.28374e-13	8.40804e-13	S000004159	YLR169W
YLR359W	302.089	389.338	176.563	167.608	-1.00622	1.32402e-13	8.65595e-13	S000004351	YLR359W	ADE13	ADEnine requiring
YDR025W	448.674	614.617	252.454	241.346	-1.10639	1.34524e-13	8.78657e-13	S000002432	YDR025W	RPS11A	Ribosomal Protein of the Small subunit
YJR063W	18.4736	21.7843	8.33402	7.42116	-1.35	1.41769e-13	9.22599e-13	S000003824	YJR063W	RPA12	RNA Polymerase A
YEL053W-A	94.7744	143.1	51.9954	51.0797	-1.20587	1.61432e-13	1.04261e-12	S000028744	YEL053W-A
YIL020C-A	18.8275	19.2303	7.52274	8.21065	-1.2744	1.73644e-13	1.11879e-12	S000028787	YIL020C-A
snR33	33.2666	22.1599	8.40777	9.71067	-1.61435	4.29705e-13	2.68603e-12	S000007298	snR33	SNR33	Small Nucleolar RNA
YGL188C-A	6.29942	7.43671	1.91756	1.73687	-1.90124	7.5907e-13	4.6153e-12	S000028635	YGL188C-A
YGL168W	18.6859	16.9767	7.08023	7.65801	-1.27553	9.04123e-13	5.45536e-12	S000003136	YGL168W	HUR1	HydroxyUrea Resistance
YNL069C	519.242	781.23	284.61	279.636	-1.20453	1.04774e-12	6.2741e-12	S000005013	YNL069C	RPL16B	Ribosomal Protein of the Large subunit
YLR029C	834.708	1143.68	486.839	433.822	-1.10348	1.05012e-12	6.28306e-12	S000004019	YLR029C	RPL15A	Ribosomal Protein of the Large subunit
snR5	34.1867	18.4791	6.78522	6.39483	-1.99767	1.27464e-12	7.57554e-12	S000007291	snR5	SNR5	Small Nucleolar RNA
YKR059W	42.0433	50.8551	22.5682	22.7372	-1.03503	1.38724e-12	8.22421e-12	S000001767	YKR059W	TIF1	Translation Initiation Factor
YLL044W	70.2845	117.184	37.6137	36.6321	-1.33546	1.60996e-12	9.44247e-12	S000003967	YLL044W
YGL253W	334.506	457.47	197.361	186.319	-1.04534	1.62634e-12	9.52286e-12	S000003222	YGL253W	HXK2	HeXoKinase
YGR064W	24.4191	30.7985	11.3579	11.8423	-1.24971	1.71102e-12	9.99404e-12	S000003296	YGR064W
YJL179W	49.0505	51.5311	17.9956	25.8951	-1.19802	1.78745e-12	1.04063e-11	S000003715	YJL179W	PFD1	PreFolDin
YNL259C	108.647	79.6253	38.2037	49.106	-1.10977	1.86748e-12	1.08457e-11	S000005203	YNL259C	ATX1	AnTioXidant
YEL050W-A	12.3865	12.1692	4.6464	4.73691	-1.38659	2.24431e-12	1.29918e-11	S000028545	YEL050W-A
YFR031C-A	354.749	484.963	213.882	178.187	-1.0985	2.24693e-12	1.29965e-11	S000002104	YFR031C-A	RPL2A	Ribosomal Protein of the Large subunit
YBR181C	142.126	193.054	89.9041	77.2906	-1.00269	2.56807e-12	1.47939e-11	S000000385	YBR181C	RPS6B	Ribosomal Protein of the Small subunit
YGL042C	16.5625	19.5307	6.1952	7.89485	-1.35788	3.82915e-12	2.19345e-11	S000003010	YGL042C
YIR036W-A	26.047	30.5731	12.3166	13.3423	-1.14129	4.05496e-12	2.31907e-11	S000028803	YIR036W-A
YOL118C	35.8854	30.1224	15.2667	15.9476	-1.08116	6.97262e-12	3.91544e-11	S000005478	YOL118C
YPL211W	51.7401	68.2825	28.0996	30.632	-1.03063	7.69465e-12	4.30393e-11	S000006132	YPL211W	NIP7	Nuclear ImPort
YLR146W-A	18.8275	19.3805	6.26895	8.92118	-1.33352	1.01554e-11	5.60985e-11	S000113566	YLR146W-A
YEL003W	131.155	109.222	50.5941	69.3958	-1.00343	1.14064e-11	6.24283e-11	S000000729	YEL003W	GIM4	Gene Involved in Microtubule biogenesis
YBR254C	27.3211	30.6482	13.5704	14.3686	-1.05248	1.28954e-11	7.02009e-11	S000000458	YBR254C	TRS20	TRapp Subunit
YGR078C	22.7911	30.9487	10.6941	11.0528	-1.3036	1.42464e-11	7.72016e-11	S000003310	YGR078C	PAC10	Perish in the Absence of Cin8p
YGL157W	34.2575	49.9536	12.1691	17.6055	-1.50056	1.47008e-11	7.94822e-11	S000003125	YGL157W	ARI1	Aldehyde Reductase Intermediate
YBL077W	12.3157	14.4227	2.36008	4.97376	-1.87125	1.47843e-11	7.97526e-11	S000000173	YBL077W
YPL197C	9.69685	14.7232	3.98263	3.15794	-1.76632	1.70025e-11	9.11662e-11	S000006118	YPL197C
YGR152C	33.125	45.4465	14.1605	17.8424	-1.29595	1.89417e-11	1.0073e-10	S000003384	YGR152C	RSR1	RaS-Related
snR82	49.1921	34.8549	18.3643	17.5266	-1.22773	2.06509e-11	1.09411e-10	S000028467	snR82	SNR82	Small Nucleolar RNA
YLR145W	31.9218	39.2868	16.8155	17.1318	-1.06766	2.29455e-11	1.20939e-10	S000004135	YLR145W	RMP1	RNase MRP Protein
YPR167C	31.9925	38.3103	17.2581	17.0529	-1.03363	2.66015e-11	1.39282e-10	S000006371	YPR167C	MET16	METhionine requiring
YKL068W-A	21.0924	25.2397	10.2516	10.5791	-1.15196	3.21867e-11	1.66205e-10	S000028524	YKL068W-A
YOR103C	29.3029	29.3712	12.5379	15.4739	-1.0682	3.28283e-11	1.69272e-10	S000005629	YOR103C	OST2	OligoSaccharylTransferase
YJL011C	22.5788	21.8594	9.95657	11.2107	-1.07092	6.41665e-11	3.23145e-10	S000003548	YJL011C	RPC17	RNA Polymerase C
YEL068C	34.9653	41.4653	20.1344	18.0003	-1.00112	7.40494e-11	3.70819e-10	S000000794	YEL068C
YPR010C-A	1298.6	820.592	415.963	490.902	-1.22462	7.8893e-11	3.93691e-10	S000122558	YPR010C-A
YLR126C	34.9653	42.2916	18.4381	19.974	-1.00764	8.13422e-11	4.05062e-10	S000004116	YLR126C
YJR145C	404.649	573.678	255.773	228.714	-1.01366	1.51485e-10	7.33341e-10	S000003906	YJR145C	RPS4A	Ribosomal Protein of the Small subunit
YOR304C-A	31.1432	37.9347	17.5531	16.5792	-1.0154	1.55734e-10	7.53399e-10	S000005830	YOR304C-A	BIL1	Bud6-Interacting Ligand
YFL013W-A	8.06891	7.28647	2.65508	2.68425	-1.52202	1.94952e-10	9.33621e-10	S000028628	YFL013W-A
YOL076W	38.1504	44.5451	18.4381	22.8161	-1.0039	2.68861e-10	1.26881e-09	S000005436	YOL076W	MDM20	Mitochondrial Distribution and Morphology
YMR175W	3626.2	2219.67	1217.65	1306.6	-1.21158	3.09089e-10	1.45001e-09	S000004787	YMR175W	SIP18	Salt Induced Protein
snR70	10.617	10.8921	4.86766	3.63163	-1.33283	4.13247e-10	1.90725e-09	S000006461	snR70	SNR70	Small Nucleolar RNA
YPR146C	14.2976	12.695	6.04769	5.84219	-1.18203	7.49247e-10	3.37493e-09	S000006350	YPR146C
YMR256C	1060.92	661.867	361.46	415.98	-1.14801	1.17466e-09	5.21535e-09	S000004869	YMR256C	COX7	Cytochrome c OXidase
YDL158C	13.2359	13.5213	5.67893	6.39483	-1.14839	1.35429e-09	5.97565e-09	S000002317	YDL158C
YGL041C-B	39.1413	37.7845	16.078	22.0266	-1.0154	1.41458e-09	6.22627e-09	S000028548	YGL041C-B
snR43	14.5099	7.66206	3.17135	2.4474	-1.9762	1.45464e-09	6.39465e-09	S000006503	snR43	SNR43	Small Nucleolar RNA
YLR275W	62.3571	47.3245	23.3057	30.632	-1.02556	2.9084e-09	1.24252e-08	S000004265	YLR275W	SMD2
snR46	17.3411	11.1926	4.27764	5.60535	-1.53239	3.52103e-09	1.49084e-08	S000006506	snR46	SNR46	Small Nucleolar RNA
YIL156W-A	13.4482	15.6997	6.41645	6.94747	-1.12388	4.26457e-09	1.79077e-08	S000028797	YIL156W-A
YJR023C	4.52992	4.65733	0.811276	1.73687	-1.85659	5.28474e-09	2.19714e-08	S000003784	YJR023C
YER146W	8.49359	9.38978	2.87634	4.10532	-1.35941	5.56472e-09	2.30816e-08	S000000948	YER146W	LSM5	Like SM
YFR056C	7.078	9.01419	2.58133	3.31584	-1.44733	5.59735e-09	2.32034e-08	S000001951	YFR056C
YAL026C-A	14.0852	12.8452	6.63771	5.84219	-1.10742	6.57429e-09	2.7002e-08	S000028730	YAL026C-A
YGR219W	8.35203	8.93907	3.0976	3.86848	-1.31237	7.66754e-09	3.12579e-08	S000003451	YGR219W
YLR341W	20.1723	17.9533	8.85028	10.1844	-1.00382	1.06619e-08	4.29006e-08	S000004333	YLR341W	SPO77	SPOrulation
YKL030W	11.4664	12.8452	5.23642	5.84219	-1.13319	1.20731e-08	4.82787e-08	S000001513	YKL030W
YAL045C	10.4754	10.4414	4.6464	4.89481	-1.13176	1.77395e-08	7.00342e-08	S000000043	YAL045C
YPL034W	18.7567	19.2303	8.26026	10.6581	-1.00769	2.38157e-08	9.26369e-08	S000005955	YPL034W
YNL113W	14.156	16.9016	8.11276	6.55273	-1.07789	3.62747e-08	1.38232e-07	S000005057	YNL113W	RPC19	RNA Polymerase C
YJL009W	8.56437	7.73718	3.31886	3.63163	-1.23018	6.72018e-08	2.49028e-07	S000003546	YJL009W
YLR076C	6.79488	6.1597	2.50758	2.6053	-1.33989	6.95471e-08	2.57451e-07	S000004066	YLR076C
YOL080C	9.05983	10.6668	3.46636	4.97376	-1.22686	7.59852e-08	2.80409e-07	S000005440	YOL080C	REX4	Rna EXonuclease
YGR174W-A	71.5585	49.578	23.3795	34.4216	-1.06901	8.94015e-08	3.27377e-07	S000028639	YGR174W-A
YKL118W	10.0508	11.418	5.16266	5.13165	-1.05778	1.69304e-07	6.01126e-07	S000001601	YKL118W
YDR246W-A	7.078	7.51182	3.46636	2.68425	-1.23862	1.70817e-07	6.06197e-07	S000028542	YDR246W-A
YJL075C	5.87474	4.65733	1.47505	2.21056	-1.51981	1.77795e-07	6.28899e-07	S000003611	YJL075C	APQ13
YOR102W	8.35203	10.5166	4.20388	4.26322	-1.15249	2.21576e-07	7.76278e-07	S000005628	YOR102W
YPR087W	4.52992	4.65733	1.84381	1.34213	-1.51593	2.26683e-07	7.93001e-07	S000006291	YPR087W	VPS69	Vacuolar Protein Sorting
YDL016C	8.84749	9.61514	3.0976	4.97376	-1.1978	4.4705e-07	1.51627e-06	S000002174	YDL016C
YLR364W	14.4391	20.0566	8.03901	8.60539	-1.04959	4.59064e-07	1.5548e-06	S000004356	YLR364W	GRX8	GlutaRedoXin
YDL050C	2.8312	3.00473	0.516266	1.02633	-1.92017	4.88055e-07	1.64673e-06	S000002208	YDL050C
YKL111C	4.38836	4.88269	1.10629	2.13161	-1.52291	7.06695e-07	2.33468e-06	S000001594	YKL111C
snR41	4.10524	4.58221	1.6963	1.50002	-1.43343	1.00083e-06	3.25508e-06	S000007305	snR41	SNR41	Small Nucleolar RNA
snR10	6.65332	3.23008	1.18004	1.50002	-1.88311	1.1998e-06	3.86115e-06	S000007499	snR10	SNR10	Small Nucleolar RNA
YOR316C-A	3.1851	3.60568	1.40129	0.710537	-1.66167	1.72579e-06	5.43679e-06	S000028584	YOR316C-A
snR50	1.84028	1.6526	0.442514	0.236846	-2.31897	1.8302e-06	5.74285e-06	S000006441	snR50	SNR50	Small Nucleolar RNA
snR49	17.1287	10.4414	3.61387	6.39483	-1.46576	1.86937e-06	5.85544e-06	S000007460	snR49	SNR49	Small Nucleolar RNA
YLR342W-A	3.1851	2.62914	0.958781	0.789485	-1.72157	3.07002e-06	9.35313e-06	S000028571	YLR342W-A
YDR426C	4.2468	3.83103	1.40129	1.73687	-1.36435	5.11617e-06	1.52161e-05	S000002834	YDR426C
YCR087W	6.44098	7.8123	3.31886	3.47374	-1.06595	6.71701e-06	1.96815e-05	S000000683	YCR087W
YPR043W	1.4156	1.87796	0.442514	0.315794	-2.07987	1.77857e-05	4.92581e-05	S000006247	YPR043W	RPL43A	Ribosomal Protein of the Large subunit
YGR069W	8.91827	6.30993	3.61387	3.71058	-1.05734	1.91636e-05	5.27666e-05	S000003301	YGR069W
YHR070C-A	3.39744	4.9578	1.40129	1.89476	-1.33832	2.14078e-05	5.87416e-05	S000028780	YHR070C-A
YML100W-A	5.59162	6.986	2.58133	3.39479	-1.07341	2.23711e-05	6.11962e-05	S000028688	YML100W-A
YKL169C	3.11432	3.83103	1.18004	1.50002	-1.36967	2.54949e-05	6.91839e-05	S000001652	YKL169C
snR36	14.9346	9.01419	4.13013	6.31588	-1.20081	3.28979e-05	8.81317e-05	S000007300	snR36	SNR36	Small Nucleolar RNA
YLR444C	3.96368	4.35686	1.25379	2.21056	-1.26866	3.71766e-05	9.87403e-05	S000004436	YLR444C
YBR089W	7.29034	11.6433	4.72015	4.42112	-1.04548	5.58903e-05	0.000145197	S000000293	YBR089W
snR39	3.1851	2.70426	0.958781	1.26318	-1.40663	5.82386e-05	0.000150967	S000007302	snR39	SNR39	Small Nucleolar RNA
YFR036W-A	4.17602	3.45544	1.62255	1.73687	-1.18303	7.93129e-05	0.000201707	S000028767	YFR036W-A
YIL115W-A	3.8929	3.68079	1.25379	2.05266	-1.20099	8.6449e-05	0.000218763	S000028795	YIL115W-A
YHR182C-A	0.920139	1.6526	0.221257	0.315794	-2.2199	9.21495e-05	0.000232281	S000028784	YHR182C-A
YGR035W-A	4.52992	3.75591	1.62255	2.13161	-1.1456	9.46199e-05	0.000238171	S000028827	YGR035W-A
YJL169W	2.97276	3.00473	1.47505	0.868434	-1.33348	0.000121196	0.000300293	S000003705	YJL169W
YGR018C	1.91106	2.62914	0.663771	0.947382	-1.48673	0.000180736	0.000436437	S000003250	YGR018C
YPR059C	1.62794	1.50236	0.737524	0.157897	-1.75759	0.000213719	0.000511061	S000006263	YPR059C
snR67	2.1234	2.10331	0.368762	1.10528	-1.52932	0.000233092	0.000554225	S000006458	snR67	SNR67	Small Nucleolar RNA
YJR022W	4.10524	4.43198	2.36008	1.81582	-1.02262	0.000241694	0.00057353	S000003783	YJR022W	LSM8	Like SM
YPR170W-A	3.68056	2.85449	1.6963	1.10528	-1.2117	0.000252957	0.000597867	S000028861	YPR170W-A
YMR075C-A	2.61886	2.25355	0.590019	1.34213	-1.34404	0.000386429	0.000885147	S000004679	YMR075C-A
YPL038W-A	2.1234	2.55402	0.811276	1.10528	-1.28261	0.000667051	0.00147438	S000028588	YPL038W-A
snR63	46.4317	18.404	12.6117	16.5792	-1.15217	0.000753694	0.0016546	S000006454	snR63	SNR63	Small Nucleolar RNA
snR42	76.3716	30.1975	21.3144	28.9741	-1.0842	0.000755062	0.00165709	S000006502	snR42	SNR42	Small Nucleolar RNA
YIL068W-A	1.4156	1.27701	0.590019	0.236846	-1.6639	0.00086001	0.00187414	S000028792	YIL068W-A
YJL032W	0.920139	0.826301	0.0737524	0.315794	-2.14276	0.00095346	0.00206578	S000003569	YJL032W
YHR214C-B	2.4773	2.4789	1.10629	1.10528	-1.15745	0.00111331	0.00238242	S000003534	YHR214C-B
YAL031W-A	2.1234	2.62914	1.5488	0.473691	-1.20267	0.00177805	0.00369398	S000028731	YAL031W-A
YDR467C	4.67148	4.58221	1.40129	3.23689	-1.00501	0.00179268	0.00372329	S000002875	YDR467C
YLR412C-A	0.7078	1.42725	0.0737524	0.55264	-1.76231	0.00200613	0.00413289	S000028572	YLR412C-A
YBR191W-A	0.63702	0.826301	0.0737524	0.236846	-2.18933	0.00229703	0.00469285	S000007594	YBR191W-A
YFR034W-A	1.34482	2.02819	0.737524	0.631588	-1.27954	0.00277355	0.0055942	S000028631	YFR034W-A
snR189	10.2631	3.15497	2.43383	2.6053	-1.41272	0.00283868	0.00571909	S000007314	snR189	SNR189	Small Nucleolar RNA
snR39B	1.27404	1.05166	0.221257	0.55264	-1.5872	0.00286511	0.00576643	S000007303	snR39B	SNR39B	Small Nucleolar RNA
YLR062C	2.1234	2.10331	0.811276	1.10528	-1.14002	0.00293066	0.00588279	S000004052	YLR062C	BUD28	BUD site selection
snR51	2.33574	3.15497	1.6963	0.947382	-1.03478	0.00328412	0.00651884	S000006442	snR51	SNR51	Small Nucleolar RNA
snR7-L	1.13248	0.976537	0.295009	0.394743	-1.59579	0.00440682	0.0085965	S000006495	snR7-L	SNR7-L	Small Nuclear RNA
YPR130C	1.91106	1.87796	1.10629	0.631588	-1.10504	0.0044704	0.00870622	S000006334	YPR130C
snR77	1.55716	1.27701	0.368762	0.710537	-1.39489	0.00476809	0.00924556	S000007311	snR77	SNR77	Small Nucleolar RNA
YML084W	1.69872	1.95307	0.590019	1.02633	-1.17593	0.0051093	0.00986156	S000004549	YML084W
YAL056C-A	1.34482	1.35213	0.516266	0.631588	-1.22343	0.00849565	0.0157985	S000002139	YAL056C-A
YHR086W-A	0.14156	0.450709	0	0	-5.01453	0.00876965	0.0162572	S000028552	YHR086W-A
YEL014C	1.69872	1.6526	0.590019	0.947382	-1.12526	0.00960741	0.0176951	S000000740	YEL014C
YOL038C-A	1.7695	1.87796	0.590019	1.18423	-1.04503	0.0116201	0.0211076	S000028812	YOL038C-A
YEL018C-A	1.98184	1.35213	0.737524	0.868434	-1.05465	0.0149858	0.0267439	S000028742	YEL018C-A
YBR174C	1.20326	1.05166	0.368762	0.631588	-1.17185	0.0211358	0.0367172	S000000378	YBR174C
YHR022C-A	0.56624	0.676064	0.147505	0.236846	-1.6529	0.0211308	0.0367172	S000028645	YHR022C-A
YGL152C	1.13248	1.35213	0.516266	0.631588	-1.10297	0.0213127	0.0369974	S000003120	YGL152C
YIR023C-A	0.56624	0.525828	0.0737524	0.236846	-1.77949	0.0233558	0.0401624	S000028801	YIR023C-A
YNL140C	0.42468	0.225355	0.0737524	0	-2.82911	0.0240035	0.0411967	S000005084	YNL140C
